# Supplementary material for: Frac-seq reveals isoform-specific recruitment to polyribosomes
Source: HighWire-hosted journal article supplement (doi:10.1101/gr.148585.112), 2013-06-19
Supplement: Supplemental_Table_1.xlsx [file Supplemental_Table_1.xlsx]

## Sheet: Sheet1
TOPHAP MAPPING STATS
# Stats from bowtie mappings
# mapping algorithm: mapalgo4_pe75x58_rptfilt_tophat
# mapping directory: tophat_bam
#
# M: Millions of fragments
# TotalCnt: total fragments input to Tophat
# MaxMapCnt: count of fragments with 10 mappings
# MaxMapPct: MaxMapCnt/TotalCnt
# MappedCnt: count of mapped fragments, INCLUDING MaxMapCnt
# MappedPct: MappedCnt/TotalCnt
# MultiCnt: count of multiply mapped fragments INCLUDING MaxMapCnt
# UniqCnt: count of uniquely mapped fragments
# SpliceCnt: count of uniquely mapped fragments with any end at splice-junction
# BothCnt: count of uniquely mapped fragments with both ends mapped
# SE1Cnt: count of uniquely mapped fragments with only read1 mapped
# SE2Cnt: count of uniquely mapped fragments with only read2 mapped
# BothSCnt: count of BothCnt fragments with either end at splice-junction
# SE1SCnt: count of SE1Cnt fragments at splice-junction
# SE2SCnt: count of SE2Cnt fragments at splice-junction
# BothDCnt: count of BothCnt fragments with discordant chromosomes
# MultiPct: MultiCnt/MappedCnt
# UniqPct: UniqCnt/MappedCnt
# SplicePct: SpliceCnt/UniqCnt
# BothPct: BothCnt/UniqCnt
# SE1Pct: SE1Cnt/UniqCnt
# SE2Pct: SE2Cnt/UniqCnt
# BothSPct: BothSCnt/UniqCnt
# SE1SPct: SE1SCnt/UniqCnt
# SE2SPct: SE2SCnt/UniqCnt
# BothDPct: BothDCnt/UniqCnt
#
#Sample	TotalCnt	MaxMapCnt	MaxMapPct	MappedCnt	MappedPct	MultiCnt	MultiPct	UniqCnt	UniqPct	SpliceCnt	SplicePct	BothCnt	BothPct	SE1Cnt	SE1Pct	SE2Cnt	SE2Pct	BothSCnt	BothSPct	SE1SCnt	SE1SPct	SE2SCnt	SE2SPct	BothDCnt	BothDPct
cyd_rn01	NA	0.01M	NA	35.14M	NA	0.67M	0.019	34.47M	0.981	14.16M	0.411	34.47M	1	0.00M	0	0.00M	0	14.16M	0.411	0.00M	0	0.00M	0	113205	0.003
psd_rn02	NA	0.00M	NA	18.83M	NA	0.31M	0.016	18.52M	0.984	8.14M	0.439	18.52M	1	0.00M	0	0.00M	0	8.14M	0.439	0.00M	0	0.00M	0	50247	0.003
cyr_rn03	NA	0.01M	NA	29.37M	NA	0.55M	0.019	28.82M	0.981	11.46M	0.398	28.82M	1	0.00M	0	0.00M	0	11.46M	0.398	0.00M	0	0.00M	0	107152	0.004
psr_rn04	NA	0.01M	NA	25.08M	NA	0.40M	0.016	24.68M	0.984	10.58M	0.428	24.68M	1	0.00M	0	0.00M	0	10.58M	0.428	0.00M	0	0.00M	0	62397	0.003
cyd_rn05	NA	0.02M	NA	48.00M	NA	0.89M	0.019	47.11M	0.981	19.05M	0.404	47.11M	1	0.00M	0	0.00M	0	19.05M	0.404	0.00M	0	0.00M	0	166321	0.004
psd_rn06	NA	0.00M	NA	20.41M	NA	0.30M	0.015	20.11M	0.985	9.35M	0.465	20.11M	1	0.00M	0	0.00M	0	9.35M	0.465	0.00M	0	0.00M	0	53686	0.003
cyr_rn07	NA	0.01M	NA	19.70M	NA	0.35M	0.018	19.35M	0.982	7.97M	0.412	19.35M	1	0.00M	0	0.00M	0	7.97M	0.412	0.00M	0	0.00M	0	71643	0.004
psr_rn08	NA	0.00M	NA	22.60M	NA	0.36M	0.016	22.24M	0.984	10.10M	0.454	22.24M	1	0.00M	0	0.00M	0	10.10M	0.454	0.00M	0	0.00M	0	79696	0.004
BOWTIE MAPPING STATS
# Stats from bowtie mappings
# mapping algorithm: mapalgo1_pe116x100_nofilt_genome
# mapping directory: bowtie_map
#
# M: Millions of reads
# TotalCnt: total reads
# UnMapCnt: count of unmapped reads
# MaxMapCnt: count of reads exceeding (no_limit)(bowtie_map) mappings
# UnMapPct: UnMapCnt/TotalCnt
# MaxMapPct: MaxMapCnt/TotalCnt
# MappedCnt: count of mapped reads, EXCLUDING MaxMapCnt
# MappedPct: MappedCnt/TotalCnt
# UniqCnt: count of uniquely mapped reads, INCLUDES uniquely mapping SpliceCnt
# MultiCnt: count of multiply mapped reads but <= (no_limit)(bowtie_map) mappings
# SpliceCnt: count of splice-junction mapped reads
# UniqPct: UniqCnt/MappedCnt
# MultiPct: MultiCnt/MappedCnt
# SplicePct: SpliceCnt/MappedCnt
#
#Sample	TotalCnt	UnMapCnt	UnMapPct	MaxMapCnt	MaxMapPct	MappedCnt	MappedPct	UniqCnt	UniqPct	MultiCnt	MultiPct	SpliceCnt	SplicePct
cyd_rn05	82.41M	51.17M	0.621	0.00M	0	31.24M	0.379	27.53M	0.881	3.71M	0.119	0.00M	0
psd_rn06	35.61M	23.19M	0.651	0.00M	0	12.42M	0.349	10.49M	0.844	1.93M	0.156	0.00M	0
cyr_rn07	30.86M	18.84M	0.61	0.00M	0	12.02M	0.39	10.53M	0.876	1.49M	0.124	0.00M	0
psr_rn08	45.54M	29.14M	0.64	0.00M	0	16.40M	0.36	13.80M	0.841	2.60M	0.159	0.00M	0
RSEM MAPPING STATS (MAPPING TO TRANSCRIPTOME)
# Stats from bowtie mappings
# mapping algorithm: mapalgoR1_pe58x58_rptfilt_xcriptome/rsem/rsemalgoR1_ihn_rd1
# mapping directory: rsem_bam
#
# M: Millions of fragments
# TotalCnt: total fragments input to Tophat
# MaxMapCnt: count of fragments with (no_limit) mappings
# MaxMapPct: MaxMapCnt/TotalCnt
# MappedCnt: count of mapped fragments, INCLUDING MaxMapCnt
# MappedPct: MappedCnt/TotalCnt
# MultiCnt: count of multiply mapped fragments INCLUDING MaxMapCnt
# UniqCnt: count of uniquely mapped fragments
# SpliceCnt: count of uniquely mapped fragments with any end at splice-junction
# BothCnt: count of uniquely mapped fragments with both ends mapped
# SE1Cnt: count of uniquely mapped fragments with only read1 mapped
# SE2Cnt: count of uniquely mapped fragments with only read2 mapped
# BothSCnt: count of BothCnt fragments with either end at splice-junction
# SE1SCnt: count of SE1Cnt fragments at splice-junction
# SE2SCnt: count of SE2Cnt fragments at splice-junction
# BothDCnt: count of BothCnt fragments with discordant chromosomes
# MultiPct: MultiCnt/MappedCnt
# UniqPct: UniqCnt/MappedCnt
# SplicePct: SpliceCnt/UniqCnt
# BothPct: BothCnt/UniqCnt
# SE1Pct: SE1Cnt/UniqCnt
# SE2Pct: SE2Cnt/UniqCnt
# BothSPct: BothSCnt/UniqCnt
# SE1SPct: SE1SCnt/UniqCnt
# SE2SPct: SE2SCnt/UniqCnt
# BothDPct: BothDCnt/UniqCnt
#
#Sample	TotalCnt	MaxMapCnt	MaxMapPct	MappedCnt	MappedPct	MultiCnt	MultiPct	UniqCnt	UniqPct	SpliceCnt	SplicePct	BothCnt	BothPct	SE1Cnt	SE1Pct	SE2Cnt	SE2Pct	BothSCnt	BothSPct	SE1SCnt	SE1SPct	SE2SCnt	SE2SPct	BothDCnt	BothDPct
cyd_rn01	NA	0.00M	NA	18.28M	NA	0.00M	0	18.28M	1	7.46M	0.408	18.28M	1	0.00M	0	0.00M	0	7.46M	0.408	0.00M	0	0.00M	0	0	0
psd_rn02	NA	0.00M	NA	10.62M	NA	0.00M	0	10.62M	1	4.66M	0.438	10.62M	1	0.00M	0	0.00M	0	4.66M	0.438	0.00M	0	0.00M	0	0	0
cyr_rn03	NA	0.00M	NA	15.07M	NA	0.00M	0	15.07M	1	6.04M	0.401	15.07M	1	0.00M	0	0.00M	0	6.04M	0.401	0.00M	0	0.00M	0	0	0
psr_rn04	NA	0.00M	NA	14.04M	NA	0.00M	0	14.04M	1	6.00M	0.428	14.04M	1	0.00M	0	0.00M	0	6.00M	0.428	0.00M	0	0.00M	0	0	0
cyd_rn05	NA	0.00M	NA	24.44M	NA	0.00M	0	24.44M	1	9.83M	0.402	24.44M	1	0.00M	0	0.00M	0	9.83M	0.402	0.00M	0	0.00M	0	0	0
psd_rn06	NA	0.00M	NA	11.69M	NA	0.00M	0	11.69M	1	5.33M	0.456	11.69M	1	0.00M	0	0.00M	0	5.33M	0.456	0.00M	0	0.00M	0	0	0
cyr_rn07	NA	0.00M	NA	10.23M	NA	0.00M	0	10.23M	1	4.19M	0.409	10.23M	1	0.00M	0	0.00M	0	4.19M	0.409	0.00M	0	0.00M	0	0	0
psr_rn08	NA	0.00M	NA	12.72M	NA	0.00M	0	12.72M	1	5.65M	0.445	12.72M	1	0.00M	0	0.00M	0	5.65M	0.445	0.00M	0	0.00M	0	0	0
