# Supplementary material for: Frac-seq reveals isoform-specific recruitment to polyribosomes
Source: HighWire-hosted journal article supplement (doi:10.1101/gr.148585.112), 2013-06-19
Supplement: Supplemental_Table_2.xlsx [file Supplemental_Table_2.xlsx]

## Sheet: Control Rep1
Miso Event Name (coordinates)	Poly_lo_ci	Poly_hi_ci	Poly_Psi	Cyto_lo_ci	Cyto_hi_ci	Cyto_Psi	DeltaPsi	Bayes Factor	Polyribosome_Reads	Poly Assigned Reads	Cytoplasm_Reads	Cyto Assigned Reads	Chrom	Ensemble Gene_id	Gene Symbol	Event Type	Location	Overlapping Elements ( Psi @ 1-Psi )	Differential_or_not
chr13:20251864:20253251:-@chr13:20249124|20249793:20248896:-	0.42	0.25	0.61	0.76	0.63	0.88	-0.34	16.81	(0,0):16,(0,1):9,(1,0):13,(1,1):21	0:22,1:21	(0,0):41,(0,1):7,(1,0):43,(1,1):26	0:61,1:15	chr13	ENST00000471658.1	PSPC1	A3SS	UTR3	PAS	diff
chr21:40719305:40720962:-@chr21:40717884|40719218:40717756:-	0.29	0.2	0.41	0.69	0.62	0.77	-0.4	4.32659e+12	(0,0):1501,(0,1):17,(1,0):37,(1,1):110	0:65,1:99	(0,0):1506,(0,1):27,(1,0):249,(1,1):258	0:430,1:104	chr21	ENST00000380749.5	HMGN1	A3SS	CDS	uORF,(TG)n	diff
chr8:144679518:144679845:-@chr8:144674830|144675112:144674817:-	0.49	0.26	0.85	0.95	0.82	0.99	-0.46	6.23	(0,0):566,(1,0):17,(1,1):35	0:42,1:10	(0,0):1124,(1,0):45,(1,1):14	00:59:00	chr8	ENST00000526838.1	EEF1D	A3SS	UTR5	IRES	diff
chrX:47053196:47053423:+@chrX:47057566|47057708:47057754:+	0.93	0.79	1	0.41	0.29	0.57	0.52	1.86771e+16	(0,0):722,(1,0):34,(1,1):12	00:46:00	(0,0):1830,(0,1):6,(1,0):45,(1,1):131	0:102,1:80	chrX	ENST00000377351.4	UBA1	A3SS	UTR5	uORF,IRES	diff
chr1:53373540:53373626:-@chr1:53370762|53373434:53370706:-	0.09	0.05	0.13	0.42	0.29	0.56	-0.33	1.4111e+07	(0,0):200,(0,1):16,(1,0):74,(1,1):6	0:76,1:20	(0,0):179,(0,1):11,(1,0):337,(1,1):3	0:338,1:13	chr1	ENST00000371522.4	ECHDC2	A3SS	CDS	SF2,K-BOX,GY-BOX,L2c	diff
chr1:53373540:53373626:-@chr1:53370762|53372283:53370706:-	0.16	0.1	0.25	0.5	0.37	0.64	-0.34	6443.97	(0,0):191,(0,1):16,(1,0):83,(1,1):6	0:83,1:22	(0,0):245,(0,1):11,(1,0):271,(1,1):3	0:272,1:13	chr1	ENST00000371522.4	ECHDC2	A3SS	CDS	SF2,GY-BOX	diff
chr3:49711795:49712054:+@chr3:49712616|49713127:49713220:+	0.34	0.23	0.49	0.77	0.66	0.88	-0.43	20582.2	(0,0):95,(0,1):14,(1,0):31,(1,1):19	0:36,1:28	(0,0):263,(0,1):7,(1,0):127,(1,1):41	0:159,1:16	chr3	ENST00000296456.5	APEH	A3SS	CDS	NA	diff
chr6:112575158:112575827:-@chr6:112537633|112537670:112537569:-	0.23	0.08	0.48	0.98	0.95	1	-0.75	2145724144850370	(0,0):169,(1,0):3,(1,1):282	0:72,1:213	(0,0):265,(1,0):75,(1,1):394	0:455,1:14	chr6	ENST00000230538.7	LAMA4	A3SS	CDS	NA	diff
chr19:2040133:2040176:-@chr19:2037828|2039855:2037470:-	0.43	0.38	0.47	0.54	0.49	0.59	-0.11	9.67	(0,0):220,(0,1):68,(1,0):874,(1,1):197	0:966,1:173	(0,0):223,(0,1):64,(1,0):1238,(1,1):210	0:1363,1:149	chr19	ENST00000591142.1	MKNK2	A3SS	CDS	ConservedRegion	diff
chr12:108955240:108956512:+@chr12:108957836|108958055:108958168:+	0.09	0.04	0.15	0.38	0.26	0.52	-0.29	34806.4	(0,0):225,(0,1):53,(1,0):6,(1,1):77	0:11,1:125	(0,0):186,(0,1):24,(1,0):21,(1,1):60	0:46,1:59	chr12	ENST00000545932.1	ISCU	A3SS	CDS	NA	diff
chr12:53295648:53296190:-@chr12:53294467|53295003:53294372:-	0.85	0.72	0.99	0.64	0.58	0.7	0.21	9.55	(0,0):680,(1,0):236,(1,1):290	0:521,1:5	(0,0):2367,(1,0):728,(1,1):1204	0:1513,1:419	chr12	ENST00000552551.1	KRT8	A3SS	CDS	ConservedRegion	diff
chr1:53373540:53373626:-@chr1:53372283|53373434:53370706:-	0.2	0.12	0.3	0.38	0.3	0.45	-0.18	8.31	(0,0):186,(0,1):30,(1,0):21,(1,1):59	0:30,1:80	(0,0):160,(0,1):30,(1,0):96,(1,1):244	0:188,1:182	chr1	ENST00000371522.4	ECHDC2	A3SS	CDS	K-BOX,L2c	diff
chr17:26925528:26925653:-@chr17:26919495|26920084:26919000:-	0.7	0.6	0.79	0.92	0.87	0.96	-0.22	416881	(0,0):132,(0,1):7,(1,0):237,(1,1):276	0:418,1:102	(0,0):464,(0,1):7,(1,0):1387,(1,1):1204	0:2445,1:153	chr17	ENST00000481916.2	RP11-192H23.4	A3SS	CDS	NA	diff
chr17:26925528:26925653:-@chr17:26919492|26920084:26919000:-	0.66	0.57	0.75	0.91	0.86	0.95	-0.25	1.15268e+08	(0,0):127,(0,1):12,(1,0):241,(1,1):272	0:420,1:105	(0,0):460,(0,1):11,(1,0):1404,(1,1):1187	0:2463,1:139	chr17	ENST00000481916.2	RP11-192H23.4	A3SS	CDS	NA	diff
chr17:25633234:25633908:+@chr17:25634770|25636126:25636298:+	0.09	0.06	0.13	0.24	0.2	0.3	-0.15	237208	(0,0):93,(0,1):56,(1,0):26,(1,1):73	0:34,1:121	(0,0):235,(0,1):61,(1,0):111,(1,1):140	0:139,1:173	chr17	ENST00000262394.2	WSB1	A3SS	CDS	ConservedRegion,IRES,uORF,(TTTC)n,PAS	diff
chr16:69166499:69166592:+@chr16:69167361|69167415:69167521:+	0.64	0.49	0.8	0.89	0.84	0.94	-0.25	14.46	(0,0):22,(0,1):10,(1,0):31,(1,1):22	0:45,1:18	(0,0):102,(0,1):12,(1,0):173,(1,1):58	0:226,1:17	chr16	ENST00000314423.7	CIRH1A	A3SS	UTR5	NA	diff
chr3:42597422:42597487:-@chr3:42590149|42594940:42589459:-	0.49	0.42	0.56	0.71	0.63	0.79	-0.22	420.84	(0,0):55,(0,1):15,(1,0):759,(1,1):190	0:851,1:113	(0,0):62,(0,1):12,(1,0):1257,(1,1):207	0:1395,1:81	chr3	ENST00000451653.1	SEC22C	A3SS	CDS	K-BOX,AluSc,ConservedRegion,BRD-BOX,AluJr,PAS,MIRc	diff
chr3:49044637:49044964:+@chr3:49048854|49049068:49049174:+	0.34	0.22	0.48	0.15	0.11	0.19	0.19	10.15	(0,0):36,(0,1):18,(1,0):21,(1,1):35	0:26,1:48	(0,0):208,(0,1):116,(1,0):47,(1,1):179	0:69,1:273	chr3	ENST00000395474.3	WDR6	A3SS	CDS	NA	diff
chr14:70235515:70235968:+@chr14:70236228|70237184:70237257:+	0.17	0.13	0.21	0.28	0.24	0.32	-0.11	86.18	(0,0):413,(0,1):88,(1,0):73,(1,1):55	0:82,1:134	(0,0):698,(0,1):145,(1,0):243,(1,1):115	0:276,1:227	chr14	ENST00000553521.1	SRSF5	A3SS	CDS	T-rich,ConservedRegion,uORF,PAS,GY-BOX	diff
chr14:24909989:24911001:-@chr14:24909698|24909807:24908985:-	0.2	0.14	0.27	0.39	0.3	0.48	-0.19	19.67	(0,0):219,(0,1):57,(1,0):28,(1,1):1025	0:189,1:921	(0,0):278,(0,1):42,(1,0):55,(1,1):1081	0:441,1:737	chr14	ENST00000251343.5	KHNYN	A3SS	CDS	ConservedRegion,IRES,UNR-bs	diff
chr6:99873091:99873534:-@chr6:99862562|99864304:99862448:-	0.11	0.05	0.18	0.27	0.2	0.35	-0.16	6.67	(0,0):56,(1,0):13,(1,1):40	0:16,1:37	(0,0):269,(1,0):89,(1,1):93	0:125,1:57	chr6	ENST00000369239.5	PNISR	A3SS	UTR5	uORF,IRES,L2c	diff
chr6:4135745:4135831:-@chr6:4133935|4133945:4133783:-	0.18	0.13	0.25	0.4	0.33	0.48	-0.22	1813.02	(0,0):155,(0,1):104,(1,0):25,(1,1):127	0:49,1:207	(0,0):192,(0,1):89,(1,0):68,(1,1):184	0:145,1:196	chr6	ENST00000380118.3	ECI2	A3SS	CDS	SF2,IRES	diff
chr15:91479176:91479212:+@chr15:91479367|91479515:91479690:+	0.26	0.15	0.39	0.04	0.03	0.07	0.22	14987.5	(0,0):80,(0,1):9,(1,0):19,(1,1):53	0:27,1:54	(0,0):337,(0,1):70,(1,0):18,(1,1):263	0:28,1:323	chr15	ENST00000394275.2	UNC45A	A3SS	CDS	NA	diff
chrX:23801917:23802208|23802044:+@chrX:23803445:23803546:+	0.05	0.02	0.09	0.35	0.25	0.47	-0.3	4.72733e+10	(0,0):1077,(1,0):7,(1,1):159	0:18,1:148	(0,0):1347,(1,0):52,(1,1):146	0:112,1:86	chrX	ENST00000379270.4	SAT1	A5SS	CDS	NA	diff
chrX:23801917:23802520|23802044:+@chrX:23803445:23803546:+	0.39	0.32	0.47	0.71	0.59	0.84	-0.32	1760.43	(0,0):897,(1,0):187,(1,1):159	0:233,1:113	(0,0):1084,(1,0):315,(1,1):146	0:433,1:28	chrX	ENST00000379270.4	SAT1	A5SS	CDS	ConservedRegion	diff
chr9:103109688:103109449|103108976:-@chr9:103108354:103108597:-	0.63	0.47	0.8	0.96	0.91	0.99	-0.33	545.12	(0,0):10,(0,1):5,(1,0):44,(1,1):35	0:63,1:21	(0,0):133,(0,1):2,(1,0):427,(1,1):240	0:665,1:4	chr9	ENST00000535814.1	TEX10	A5SS	CDS	NA	diff
chr16:89865640:89865574|89865359:-@chr16:89862314:89862426:-	0.56	0.39	0.72	0.08	0.05	0.11	0.48	1136152759978020	(0,0):259,(0,1):8,(1,0):29,(1,1):1	0:29,1:9	(0,0):279,(0,1):58,(1,0):20,(1,1):42	0:23,1:97	chr16	ENST00000389301.3	FANCA	A5SS	CDS	NA	diff
chr3:20216547:20216497|20215741:-@chr3:20212531:20212724:-	0.21	0.13	0.3	0.73	0.59	0.85	-0.52	1.16273e+32	(0,0):38,(0,1):5,(1,0):38,(1,1):37	0:44,1:36	(0,0):116,(0,1):4,(1,0):292,(1,1):73	0:349,1:20	chr3	ENST00000306698.2	SGOL1	A5SS	CDS	NA	diff
chr1:113242841:113242962|113242932:+@chr1:113243038:113245004:+	0.41	0.27	0.6	0.97	0.92	0.99	-0.56	1.92051e+26	(0,0):564,(1,0):19,(1,1):3274	0:1290,1:2003	(0,0):474,(0,1):1,(1,0):110,(1,1):2457	0:2549,1:19	chr1	ENST00000413052.2	MOV10	A5SS	CDS	ConservedRegion	diff
chr1:1328183:1328059|1327976:-@chr1:1326146:1326955:-	0.79	0.6	0.93	0.46	0.35	0.59	0.33	11.89	(0,0):199,(0,1):3,(1,0):25,(1,1):151	0:141,1:38	(0,0):473,(0,1):24,(1,0):38,(1,1):347	0:156,1:253	chr1	ENST00000482621.1	CCNL2	A5SS	CDS	ConservedRegion	diff
chr1:173833842:173833813|173833622:-@chr1:173833039:173833442:-	0.08	0.03	0.17	0.5	0.34	0.71	-0.42	993640	(0,0):377,(0,1):1,(1,0):5,(1,1):149	0:29,1:126	(0,0):385,(1,0):41,(1,1):167	0:140,1:68	chr1	ENST00000450589.1	GAS5	A5SS	UTR3	NA	diff
chr10:70105668:70105588|70105459:-@chr10:70100864:70101045:-	0.16	0.07	0.29	0.52	0.39	0.68	-0.36	8099.71	(0,0):1906,(1,0):8,(1,1):83	0:15,1:76	(0,0):4699,(1,0):60,(1,1):175	0:159,1:76	chr10	ENST00000466493.1	RUFY2	A5SS	UTR3	PAS	diff
chr6:7579508:7581802|7580005:+@chr6:7582875:7586950:+	0.3	0.22	0.39	0.67	0.64	0.7	-0.37	1.80132e+31	(0,0):8,(0,1):4,(1,0):52,(1,1):424	0:201,1:279	(0,0):164,(0,1):75,(1,0):2887,(1,1):9971	0:9693,1:3240	chr6	ENST00000379802.3	DSP	A5SS	CDS	SF2	diff
chrX:70348448:70348703|70348568:+@chrX:70348964:70349279:+	0.26	0.09	0.5	0.02	0	0.06	0.24	6.54	(0,0):29,(0,1):6,(1,0):3,(1,1):17	0:7,1:19	(0,0):211,(0,1):51,(1,0):1,(1,1):88	0:2,1:138	chrX	ENST00000374102.1	MED12	A5SS	CDS	NA	diff
chr9:130924283:130925231|130924623:+@chr9:130925722:130926207:+	0.05	0.03	0.06	0.17	0.13	0.22	-0.12	2.99115e+10	(0,0):187,(1,0):31,(1,1):847	0:62,1:816	(0,0):115,(1,0):66,(1,1):489	0:150,1:405	chr9	ENST00000372994.1	C9orf16	A5SS	CDS	NA	diff
chr2:10563109:10566107|10563214:+@chr2:10566346:10566621:+	0.03	0.01	0.06	0.14	0.08	0.23	-0.11	24.74	(0,0):195,(1,0):6,(1,1):28	0:6,1:28	(0,0):126,(0,1):2,(1,0):34,(1,1):26	0:36,1:26	chr2	ENST00000307845.3	HPCAL1	A5SS	CDS	MIRb,AluY,MIRc	diff
chr2:60689559:60689417|60687817:-@chr2:60678302:60679801:-	0.63	0.51	0.75	0.92	0.87	0.96	-0.29	2.6387e+07	(0,0):76,(0,1):10,(1,0):90,(1,1):82	0:148,1:34	(0,0):383,(0,1):7,(1,0):286,(1,1):114	0:394,1:13	chr2	ENST00000356842.4	BCL11A	A5SS	CDS	ConservedRegion,GA-rich	diff
chr7:23562051:23561973|23561751:-@chr7:23561326:23561459:-	0.06	0.03	0.09	0.2	0.15	0.25	-0.14	3.1097e+08	(0,0):379,(1,0):18,(1,1):219	0:27,1:210	(0,0):565,(0,1):6,(1,0):90,(1,1):278	0:144,1:230	chr7	ENST00000297071.4	TRA2A	A5SS	CDS	SF2,uORF,UNR-bs	diff
chr7:23562051:23561973|23561740:-@chr7:23561326:23561459:-	0.06	0.04	0.09	0.19	0.15	0.24	-0.13	9.16401e+06	(0,0):374,(1,0):23,(1,1):219	0:28,1:214	(0,0):565,(0,1):6,(1,0):90,(1,1):278	0:149,1:225	chr7	ENST00000297071.4	TRA2A	A5SS	CDS	SF2,uORF,UNR-bs	diff
chr1:42922918:42923238|42923021:+@chr1:42925274:42926900:+	0.17	0.12	0.24	0.33	0.25	0.41	-0.16	5.73	(0,0):96,(0,1):62,(1,0):25,(1,1):497	0:100,1:484	(0,0):115,(0,1):49,(1,0):49,(1,1):537	0:214,1:421	chr1	ENST00000472013.1	PPCS	A5SS	CDS	ConservedRegion,uORF,L2c	diff
chr1:53364896:53364846|53363109:-@chr1:53361582:53362269:-	0.1	0.08	0.13	0.31	0.26	0.37	-0.21	3.36516e+26	(0,0):109,(0,1):5,(1,0):72,(1,1):266	0:98,1:245	(0,0):195,(0,1):5,(1,0):194,(1,1):234	0:266,1:167	chr1	ENST00000371522.4	ECHDC2	A5SS	CDS	ConservedRegion,MER3,AluSc8,MIRb,MIR	diff
chr21:45750799:45750706|45750346:-@chr21:45748807:45750209:-	0.21	0.14	0.28	0.38	0.31	0.45	-0.17	33.92	(0,0):71,(0,1):51,(1,0):30,(1,1):276	0:88,1:269	(0,0):122,(0,1):56,(1,0):93,(1,1):533	0:310,1:372	chr21	ENST00000339818.4	C21orf2	A5SS	CDS	NA	diff
chr10:70644016:70646374|70644215:+@chr10:70652345:70653435:+	0.71	0.49	0.89	0.96	0.92	0.99	-0.25	5.2	(0,0):15,(0,1):2,(1,0):52,(1,1):31	0:78,1:7	(0,0):30,(0,1):4,(1,0):414,(1,1):65	0:479,1:4	chr10	ENST00000399169.4	STOX1	A5SS	CDS	NA	diff
chr12:123461418:123461845|123461517:+@chr12:123462907:123463116:+	0.04	0.01	0.08	0.22	0.11	0.36	-0.18	11.33	(0,0):101,(0,1):12,(1,0):4,(1,1):65	0:6,1:75	(0,0):105,(0,1):5,(1,0):14,(1,1):42	0:24,1:37	chr12	ENST00000542678.1	ABCB9	A5SS	CDS	IRES,uORF,LTR33	diff
chr12:46319925:46323748:-@chr12:46385668:46385903:-	0.63	0.4	0.87	0.96	0.91	0.98	-0.33	8.57	(0,0):232,(0,1):2,(1,0):81	0:81,1:2	(0,0):1547,(0,1):4,(1,0):2366	0:2366,1:4	chr12	ENST00000465950.1	SCAF11	AFE	UTR5	L1MA8,ConservedRegion,AT_rich,uORF,Tigger2b_PrDNA/TcMar-Tigger,AluJb@NA	diff
chr22:31644348:31644755:+@chr22:31608250:31608410:+	0.75	0.51	0.93	0.35	0.22	0.53	0.4	12.16	(0,0):38,(0,1):2,(1,0):27	0:27,1:2	(0,0):104,(0,1):14,(1,0):26	0:26,1:14	chr22	ENST00000331728.4	LIMK2	AFE	UTR5	ConservedRegion,uORF,IRES@ConservedRegion,IRES	diff
chr19:20149982:20150064:-,chr19:20141802:20141922:-,chr19:20141517:20141691:-,chr19:20135059:20135185:-@chr19:20150152:20150277:-,chr19:20115227:20118084:-	0.6	0.39	0.78	0.12	0.03	0.23	0.48	431.45	(0,0):78,(0,1):34,(1,0):9	0:9,1:34	(0,0):239,(0,1):174,(1,0):3	0:3,1:174	chr19	ENST00000397165.1	ZNF682	AFE	UTR5	ConservedRegion,uORF,IRES@SF2,ConservedRegion,AT_rich,AluYc3,PAS	diff
chr14:24657925:24659014:-,chr14:24657550:24657844:-,chr14:24657422:24657463:-,chr14:24656873:24657002:-@chr14:24659586:24659797:-,chr14:24657925:24659014:-	0.24	0.19	0.3	0.61	0.57	0.65	-0.37	6.42845e+90	(0,0):115,(0,1):106,(1,0):52,(1,1):243	0:124,1:277	(0,0):261,(0,1):172,(1,0):376,(1,1):408	0:615,1:341	chr14	ENST00000561090.1	IPO4	AFE	UTR5	ConservedRegion@NA	diff
chr14:24657758:24658002:-,chr14:24657550:24657629:-,chr14:24657422:24657463:-,chr14:24656873:24657002:-,chr14:24656606:24656785:-,chr14:24656291:24656356:-,chr14:24656084:24656185:-,chr14:24655914:24655997:-,chr14:24655493:24655657:-,chr14:24655335:24655411:-@chr14:24659586:24659797:-,chr14:24657925:24659014:-	0.46	0.42	0.5	0.76	0.74	0.77	-0.3	1.75523e+254	(0,0):152,(0,1):349,(1,0):268	0:268,1:349	(0,0):533,(0,1):579,(1,0):1616,(1,1):1	0:1617,1:579	chr14	ENST00000561090.1	IPO4	AFE	UTR5	SF2,ConservedRegion@ConservedRegion,PAS	diff
chr14:24657925:24659014:-,chr14:24657758:24657844:-,chr14:24657550:24657597:-,chr14:24657422:24657463:-,chr14:24656873:24657002:-@chr14:24659586:24659797:-,chr14:24657925:24659014:-	0.26	0.2	0.33	0.63	0.59	0.68	-0.37	3.66191e+96	(0,0):122,(0,1):106,(1,0):45,(1,1):243	0:136,1:258	(0,0):293,(0,1):172,(1,0):344,(1,1):408	0:596,1:328	chr14	ENST00000561090.1	IPO4	AFE	UTR5	ConservedRegion@NA	diff
chr14:92482040:92482205:-@chr14:92505891:92506817:-	0.08	0.01	0.21	0.66	0.57	0.73	-0.58	9.03388e+50	(0,0):41,(0,1):81	0:0,1:81	(0,0):236,(0,1):165,(1,0):35	0:35,1:165	chr14	ENST00000267622.4	TRIP11	AFE	UTR5	NA@ConservedRegion,uORF,IRES	diff
chr14:35591928:35592116:+,chr14:35595941:35595988:+,chr14:35596685:35596817:+@chr14:35591776:35591841:+,chr14:35592158:35593437:+	0.65	0.56	0.72	0.35	0.29	0.42	0.3	227694638459594	(0,0):57,(0,1):103,(1,0):45	0:45,1:103	(0,0):101,(0,1):386,(1,0):49	0:49,1:386	chr14	ENST00000554896.1	RP11-173D9.3	AFE	UTR5	K-BOX,ConservedRegion,uORF@ConservedRegion,uORF	diff
chr6:30890881:30891008:+,chr6:30891130:30892337:+@chr6:30680459:30680477:+,chr6:30680938:30681170:+	0.49	0.36	0.64	0.19	0.16	0.23	0.3	1.14202e+07	(0,0):65302,(0,1):16,(1,0):102	0:102,1:16	(0,0):76079,(0,1):124,(1,0):203	0:203,1:124	chr6	ENST00000321897.5	VARS2	AFE	UTR5	MER5A,SF2,ConservedRegion@ConservedRegion	diff
chr6:3077117:3077328:-@chr6:31774532:31774743:-	0.09	0.01	0.21	0.55	0.39	0.7	-0.46	2.86976e+11	(0,0):329254,(0,1):20,(1,0):1	0:1,1:20	(0,0):571016,(0,1):16,(1,0):19	0:19,1:16	chr6	ENST00000541791.1	RIPK1	AFE	UTR5	NA@SF2	diff
chr6:31928951:31929385:-@chr6:32160249:32160683:-	0.2	0.13	0.3	0.69	0.62	0.75	-0.49	7.94688e+61	(0,0):22587,(0,1):65,(1,0):16	0:16,1:65	(0,0):26659,(0,1):56,(1,0):126	0:126,1:56	chr6	ENST00000375394.2	SKIV2L	AFE	UTR5	ConservedRegion,uORF@SF2,ConservedRegion,uORF	diff
chr8:124253470:124253617:-@chr8:124279513:124279626:-	0.79	0.59	0.91	0.22	0.15	0.3	0.57	2.22988e+11	(0,0):484,(0,1):3,(1,0):22	0:22,1:3	(0,0):2476,(0,1):55,(1,0):27	0:27,1:55	chr8	ENST00000276704.4	C8orf76	AFE	UTR5	NA@ConservedRegion,uORF	diff
chr7:102183972:102184517:-@chr7:102311999:102312182:-	0.26	0.18	0.37	0.59	0.49	0.69	-0.33	2.25697e+07	(0,0):5876,(0,1):26,(1,0):38	0:38,1:26	(0,0):7353,(0,1):23,(1,0):139	0:139,1:23	chr7	ENST00000379340.5	POLR2J3	AFE	UTR5	SF2,ConservedRegion@NA	diff
chr1:23638155:23638386:-,chr1:23637694:23637815:-@chr1:23667345:23667510:-	0.72	0.63	0.82	0.3	0.27	0.34	0.42	3.42571e+53	(0,0):2763,(0,1):17,(1,0):137	0:137,1:17	(0,0):6246,(0,1):205,(1,0):271	0:271,1:205	chr1	ENST00000478691.1	HNRNPR	AFE	UTR5	SF2@IRES	diff
chr1:7804895:7805082:+@chr1:6845384:6845635:+	0.17	0.06	0.29	0.52	0.37	0.65	-0.35	49.17	(0,0):1923,(0,1):45,(1,0):5	0:5,1:45	(0,0):1913,(0,1):31,(1,0):22	0:22,1:31	chr1	ENST00000303635.6	CAMTA1	AFE	UTR5	ConservedRegion@(CGG)n,SF2,ConservedRegion,IRES	diff
chr1:7796404:7796600:+@chr1:6845384:6845635:+	0.17	0.07	0.29	0.61	0.5	0.72	-0.44	1.37489e+11	(0,0):1890,(0,1):45,(1,0):6	0:6,1:45	(0,0):1697,(0,1):31,(1,0):35	0:35,1:31	chr1	ENST00000303635.6	CAMTA1	AFE	UTR5	NA@(CGG)n,SF2,ConservedRegion,IRES	diff
chr2:160289268:160290662:-@chr2:160568825:160568946:-,chr2:160567228:160567405:-,chr2:160527219:160527321:-,chr2:160472753:160473112:-,chr2:160412334:160412376:-,chr2:160335086:160335232:-	0.13	0.05	0.23	0.43	0.36	0.5	-0.3	1.15788e+06	(0,0):78,(0,1):27,(1,0):5	0:5,1:27	(0,0):442,(0,1):87,(1,0):98	0:98,1:87	chr2	ENST00000392782.1	BAZ2B	AFE	UTR5	NA@SF2,L1MEf,ConservedRegion,uORF	diff
chr2:160310124:160310312:-@chr2:160568825:160568946:-,chr2:160567228:160567405:-,chr2:160527219:160527321:-,chr2:160472753:160473112:-,chr2:160412334:160412376:-,chr2:160335086:160335232:-	0.18	0.02	0.51	0.66	0.55	0.76	-0.48	13.52	(0,0):74,(0,1):27	0:0,1:27	(0,0):229,(0,1):87,(1,0):23	0:23,1:87	chr2	ENST00000392782.1	BAZ2B	AFE	UTR5	NA@SF2,L1MEf,ConservedRegion,uORF	diff
chr2:190718655:190718808:+,chr2:190718965:190719854:+@chr2:190648811:190649319:+,chr2:190656516:190656667:+	0.3	0.17	0.45	0.65	0.6	0.7	-0.35	5728.57	(0,0):157,(0,1):22,(1,0):15	0:15,1:22	(0,0):461,(0,1):86,(1,0):265	0:265,1:86	chr2	ENST00000441310.2	PMS1	AFE	UTR5	ConservedRegion@uORF,IRES	diff
chr17:58964411:58964572:+,chr17:58967056:58967132:+@chr17:58755172:58755275:+,chr17:58756814:58756901:+	0.93	0.82	0.98	0.58	0.45	0.71	0.35	1537.76	(0,0):104,(0,1):1,(1,0):35	0:35,1:1	(0,0):357,(0,1):18,(1,0):37	0:37,1:18	chr17	ENST00000589222.1	BCAS3	AFE	UTR5	NA@ConservedRegion	diff
chr10:65028423:65028982:-,chr10:65024411:65024524:-,chr10:64979638:64979743:-,chr10:64976967:64977091:-,chr10:64975309:64975456:-,chr10:64975023:64975215:-@chr10:65225255:65225722:-	0.12	0.04	0.24	0.56	0.49	0.63	-0.44	1051313991650210	(0,0):15,(0,1):16,(1,0):5	0:5,1:16	(0,0):159,(0,1):59,(1,0):220	0:220,1:59	chr10	ENST00000554702.1	JMJD1C	AFE	UTR5	uORF@NA	diff
chr10:64950654:64950868:-@chr10:65225255:65225722:-	0.49	0.28	0.69	0.81	0.76	0.86	-0.32	20.07	(0,0):121,(0,1):16,(1,0):6	0:6,1:16	(0,0):2507,(0,1):59,(1,0):96	0:96,1:59	chr10	ENST00000554702.1	JMJD1C	AFE	UTR5	UNR-bs@NA	diff
chr10:64966355:64968561:-@chr10:65225255:65225722:-	0.34	0.22	0.48	0.74	0.69	0.79	-0.4	1.74993e+13	(0,0):49,(0,1):16,(1,0):42	0:42,1:16	(0,0):1087,(0,1):59,(1,0):906	0:906,1:59	chr10	ENST00000554702.1	JMJD1C	AFE	UTR5	NA@NA	diff
chr4:467770:467998:-@chr4:492845:493442:-,chr4:433779:438221:-	0.91	0.86	0.94	0.6	0.52	0.67	0.31	5.72416e+29	(0,0):147,(0,1):61,(1,0):21	0:21,1:61	(0,0):343,(0,1):998,(1,0):47	0:47,1:998	chr4	ENST00000451020.2	ABCA11P	AFE	UTR5	uORF@SF2,K-BOX,ConservedRegion,uORF,AluSp,PAS,UNR-bs	diff
chr15:93514995:93515157:+@chr15:93429433:93429484:+,chr15:93435234:93435302:+,chr15:93444397:93444529:+	0.14	0.01	0.33	0.49	0.39	0.59	-0.35	57.28	(0,0):867,(0,1):31,(1,0):2	0:2,1:31	(0,0):2396,(0,1):70,(1,0):34	0:34,1:70	chr15	ENST00000557381.1	CHD2	AFE	UTR5	SF2@ConservedRegion,uORF	diff
chr3:56667072:56667994:-@chr3:56716704:56717135:-	0.55	0.44	0.66	0.72	0.68	0.76	-0.17	9.18	(0,0):273,(0,1):24,(1,0):68	0:68,1:24	(0,0):2168,(0,1):124,(1,0):765	0:765,1:124	chr3	ENST00000459993.1	FAM208A	AFE	UTR5	ConservedRegion@SF2,ConservedRegion	diff
chr12:49720424:49720503:+,chr12:49720992:49721113:+@chr12:49716971:49717132:+,chr12:49717387:49717535:+	0.12	0.08	0.16	0.25	0.2	0.3	-0.13	64.61	(0,0):998,(0,1):415,(1,0):29	0:29,1:415	(0,0):927,(0,1):312,(1,0):55	0:55,1:312	chr12	ENST00000551245.1	TROAP	AFE	UTR5	NA@ConservedRegion	diff
chr12:46319925:46323748:-@chr12:46384136:46384401:-,chr12:46357890:46357971:-	0.13	0.09	0.18	0.4	0.37	0.43	-0.27	5.22726e+59	(0,0):182,(0,1):41,(1,0):81	0:81,1:41	(0,0):1262,(0,1):262,(1,0):2366	0:2366,1:262	chr12	ENST00000465950.1	SCAF11	AFE	UTR5	L1MA8,ConservedRegion,AT_rich,uORF,Tigger2b_PrDNA/TcMar-Tigger,AluJb@G-rich,ConservedRegion,IRES	diff
chr5:96294156:96294480:+,chr5:96314842:96315682:+@chr5:96271346:96271878:+	0.56	0.39	0.74	0.84	0.75	0.91	-0.28	10.56	(0,0):89,(0,1):9,(1,0):26	0:26,1:9	(0,0):111,(0,1):11,(1,0):140	0:140,1:11	chr5	ENST00000231368.5	LNPEP	AFE	UTR5	uORF,MLT1D@ConservedRegion,uORF,IRES,L2a	diff
chr5:112630026:112630612:-@chr5:112823942:112824527:-	0.62	0.45	0.76	0.89	0.8	0.95	-0.27	11.08	(0,0):93,(0,1):14,(1,0):22	0:22,1:14	(0,0):163,(0,1):8,(1,0):69	0:69,1:8	chr5	ENST00000302475.4	MCC	AFE	UTR5	ConservedRegion,uORF@ConservedRegion,uORF,IRES	diff
chr18:47375937:47376216:-@chr18:47428964:47429203:-	0.42	0.29	0.55	0.15	0.08	0.23	0.27	89.8	(0,0):217,(0,1):26,(1,0):23	0:23,1:26	(0,0):646,(0,1):73,(1,0):15	0:15,1:73	chr18	ENST00000285039.7	MYO5B	AFE	UTR5	NA@NA	diff
chr22:38153620:38154145:+,chr22:38155161:38155271:+,chr22:38161677:38161824:+@chr22:38082344:38082482:+,chr22:38083917:38084022:+,chr22:38084319:38084367:+,chr22:38084857:38084999:+,chr22:38086704:38086801:+,chr22:38087181:38087431:+,chr22:38089339:38089417:+,chr22:38093595:38093703:+,chr22:38097313:38097486:+	0.3	0.28	0.32	0.44	0.42	0.46	-0.14	5.46279e+91	(0,0):1175,(0,1):2192,(1,0):620	0:620,1:2192	(0,0):1406,(0,1):1486,(1,0):766	0:766,1:1486	chr22	ENST00000407319.2	TRIOBP	AFE	UTR5	SF2@SF2,ConservedRegion	diff
chr21:34959828:34959908:-,chr21:34958284:34958487:-,chr21:34956896:34957074:-,chr21:34954471:34954552:-,chr21:34954257:34954361:-@chr21:35284593:35284703:-,chr21:35281386:35281515:-,chr21:35279645:35279757:-	0.06	0.05	0.07	0.17	0.16	0.18	-0.11	1000000000000	(0,0):5366,(0,1):3103,(1,0):408	0:408,1:3103	(0,0):8762,(0,1):2383,(1,0):980	0:980,1:2383	chr21	ENST00000303071.5	DONSON	AFE	UTR5	SF2@SF2,uORF	diff
chr11:57529234:57529591:+,chr11:57561482:57561553:+,chr11:57563049:57563201:+@chr11:57480042:57480279:+,chr11:57505080:57505140:+,chr11:57556509:57556627:+,chr11:57558857:57559145:+	0.11	0.08	0.15	0.32	0.29	0.35	-0.21	2.31521e+70	(0,0):4311,(0,1):362,(1,0):35	0:35,1:362	(0,0):4211,(0,1):620,(1,0):235	0:235,1:620	chr11	ENST00000524630.1	CTNND1	AFE	UTR5	SF2,L1MEf,ConservedRegion,uORF,(GA)n@SF2,ConservedRegion,IRES,uORF	diff
chr11:57529269:57529540:+,chr11:57561482:57561553:+,chr11:57563049:57563201:+@chr11:57480042:57480279:+,chr11:57505080:57505140:+,chr11:57556509:57556627:+,chr11:57558857:57559145:+	0.13	0.09	0.17	0.36	0.33	0.39	-0.23	6.55067e+53	(0,0):4311,(0,1):362,(1,0):35	0:35,1:362	(0,0):4214,(0,1):620,(1,0):232	0:232,1:620	chr11	ENST00000524630.1	CTNND1	AFE	UTR5	SF2,L1MEf,ConservedRegion,uORF,(GA)n@SF2,ConservedRegion,IRES,uORF	diff
chr11:57529234:57529518:+,chr11:57563049:57563201:+@chr11:57480042:57480279:+,chr11:57505080:57505140:+,chr11:57556509:57556627:+,chr11:57558857:57559145:+	0.12	0.08	0.16	0.35	0.31	0.39	-0.23	1.28785e+50	(0,0):4319,(0,1):362,(1,0):27	0:27,1:362	(0,0):4256,(0,1):620,(1,0):190	0:190,1:620	chr11	ENST00000524630.1	CTNND1	AFE	UTR5	ConservedRegion,(GA)n@SF2,ConservedRegion,IRES,uORF	diff
chr11:57529234:57529518:+,chr11:57569205:57569668:+@chr11:57480042:57480279:+,chr11:57505080:57505140:+,chr11:57556509:57556627:+,chr11:57558857:57559145:+	0.21	0.17	0.24	0.49	0.46	0.52	-0.28	4.85527e+196	(0,0):4460,(0,1):362,(1,0):100	0:100,1:362	(0,0):5139,(0,1):620,(1,0):637	0:637,1:620	chr11	ENST00000524630.1	CTNND1	AFE	UTR5	ConservedRegion,(GA)n@SF2,ConservedRegion,IRES,uORF	diff
chr11:57529234:57529591:+,chr11:57569205:57569668:+@chr11:57480042:57480279:+,chr11:57505080:57505140:+,chr11:57556509:57556627:+,chr11:57558857:57559145:+	0.19	0.16	0.23	0.47	0.44	0.49	-0.28	8.9129e+191	(0,0):4460,(0,1):362,(1,0):100	0:100,1:362	(0,0):5138,(0,1):620,(1,0):638	0:638,1:620	chr11	ENST00000524630.1	CTNND1	AFE	UTR5	SF2,ConservedRegion,uORF,(GA)n@SF2,ConservedRegion,IRES,uORF	diff
chr11:66406406:66407594:+@chr11:66384097:66384528:+	0.58	0.55	0.62	0.46	0.43	0.48	0.12	2.00734e+09	(0,0):1825,(0,1):218,(1,0):948	0:948,1:218	(0,0):5048,(0,1):613,(1,0):1607	0:1607,1:613	chr11	ENST00000310092.7	RBM4	AFE	UTR5	SF2,IRES@SF2,ConservedRegion,IRES	diff
chr11:66406138:66406223:+,chr11:66407171:66408662:+@chr11:66384097:66384528:+	0.56	0.52	0.59	0.42	0.4	0.44	0.14	2.13542e+21	(0,0):1710,(0,1):218,(1,0):1148	0:1148,1:218	(0,0):4896,(0,1):613,(1,0):1871	0:1871,1:613	chr11	ENST00000310092.7	RBM4	AFE	UTR5	SF2,AT_rich,ConservedRegion,IRES,Tigger4a,PAS@SF2,ConservedRegion,IRES	diff
chr11:57529234:57529518:+,chr11:57561482:57561553:+,chr11:57563049:57563201:+@chr11:57480042:57480279:+,chr11:57505080:57505140:+,chr11:57556509:57556627:+,chr11:57558857:57559145:+	0.13	0.1	0.17	0.36	0.33	0.4	-0.23	1.46317e+76	(0,0):4309,(0,1):362,(1,0):37	0:37,1:362	(0,0):4203,(0,1):620,(1,0):243	0:243,1:620	chr11	ENST00000524630.1	CTNND1	AFE	UTR5	L1MEf,ConservedRegion,(GA)n@SF2,ConservedRegion,IRES,uORF	diff
chr11:67957384:67957619:-,chr11:67953248:67953395:-,chr11:67947599:67947667:-,chr11:67942485:67942650:-,chr11:67941271:67941380:-,chr11:67939010:67939176:-,chr11:67938699:67938763:-,chr11:67938482:67938618:-,chr11:67934449:67934645:-,chr11:67923507:67926638:-@chr11:67980605:67980784:-,chr11:67957384:67957619:-	0.55	0.41	0.75	0.82	0.7	0.92	-0.27	5.02	(0,0):170,(0,1):4,(1,0):226,(1,1):28	0:233,1:25	(0,0):440,(0,1):6,(1,0):1117,(1,1):80	0:1187,1:16	chr11	ENST00000441488.2	SUV420H1	AFE	UTR5	hsa-miR-548d-3p,hsa-miR-93,ConservedRegion,BRD-BOX,hsa-miR-106b,PAS,UNR-bs@ConservedRegion,GC_rich,IRES	diff
chr19:37935809:37935866:-,chr19:37902060:37905321:-@chr19:37957986:37958339:-,chr19:37956215:37956375:-,chr19:37935809:37935866:-	0.33	0.26	0.42	0.51	0.47	0.56	-0.18	158.99	(0,0):54,(0,1):38,(1,0):119	0:119,1:38	(0,0):310,(0,1):141,(1,0):954	0:954,1:141	chr19	ENST00000392149.2	ZNF569	AFE	UTR5	K-BOX,ConservedRegion,PAS@IRES,L2a	diff
chr14:23540334:23540747:-@chr14:23548756:23550018:-	0.55	0.48	0.61	0.26	0.23	0.29	0.29	5.24154e+37	(0,0):172,(0,1):204,(1,0):70	0:70,1:204	(0,0):816,(0,1):1409,(1,0):143	0:143,1:1409	chr14	ENST00000338631.6	ACIN1	AFE	UTR5	NA@SF2	diff
chr14:23540636:23540770:-,chr14:23540334:23540395:-@chr14:23548756:23550018:-	0.67	0.6	0.74	0.38	0.33	0.43	0.29	4.3501e+19	(0,0):198,(0,1):204,(1,0):44	0:44,1:204	(0,0):870,(0,1):1409,(1,0):89	0:89,1:1409	chr14	ENST00000338631.6	ACIN1	AFE	UTR5	NA@SF2	diff
chr14:23540636:23540770:-@chr14:23548756:23550018:-	0.75	0.66	0.81	0.51	0.44	0.57	0.24	1.69541e+06	(0,0):142,(0,1):204,(1,0):32	0:32,1:204	(0,0):766,(0,1):1409,(1,0):75	0:75,1:1409	chr14	ENST00000338631.6	ACIN1	AFE	UTR5	NA@SF2	diff
chr14:23548756:23550018:-@chr14:23564184:23564823:-	0.51	0.45	0.57	0.76	0.74	0.79	-0.25	3.09279e+41	(0,0):219,(0,1):95,(1,0):204	0:204,1:95	(0,0):578,(0,1):206,(1,0):1409	0:1409,1:206	chr14	ENST00000262710.1	ACIN1	AFE	UTR5	SF2@ConservedRegion,IRES,uORF,TOP	diff
chr14:24653856:24653969:-@chr14:24657925:24659014:-	0.56	0.4	0.69	0.83	0.8	0.86	-0.27	1036.63	(0,0):560,(0,1):243,(1,0):13	0:13,1:243	(0,0):3102,(0,1):408,(1,0):83	0:83,1:408	chr14	ENST00000561090.1	IPO4	AFE	UTR5	NA@ConservedRegion,PAS	diff
chr14:24653856:24653969:-@chr14:24659586:24659797:-,chr14:24657925:24659014:-	0.53	0.39	0.65	0.81	0.77	0.84	-0.28	478358	(0,0):604,(0,1):349,(1,0):13	0:13,1:349	(0,0):3159,(0,1):580,(1,0):83	0:83,1:580	chr14	ENST00000561090.1	IPO4	AFE	UTR5	NA@ConservedRegion,PAS	diff
chr14:24657758:24658002:-,chr14:24657550:24657629:-,chr14:24657422:24657463:-,chr14:24656873:24657002:-,chr14:24656606:24656785:-,chr14:24656291:24656356:-,chr14:24656084:24656185:-,chr14:24655914:24655997:-,chr14:24655493:24655657:-,chr14:24655335:24655411:-@chr14:24657925:24659014:-	0.51	0.46	0.55	0.79	0.77	0.8	-0.28	4.57851e+160	(0,0):108,(0,1):243,(1,0):268	0:268,1:243	(0,0):476,(0,1):407,(1,0):1616,(1,1):1	0:1617,1:407	chr14	ENST00000561090.1	IPO4	AFE	UTR5	SF2,ConservedRegion@ConservedRegion,PAS	diff
chr6:158491160:158491538:+,chr6:158492634:158492826:+@chr6:158438173:158438322:+,chr6:158449788:158450058:+,chr6:158454487:158454712:+,chr6:158464348:158464431:+	0.06	0.02	0.1	0.2	0.16	0.24	-0.14	1672.47	(0,0):387,(0,1):156,(1,0):6	0:6,1:156	(0,0):960,(0,1):350,(1,0):68	0:68,1:350	chr6	ENST00000367121.3	SYNJ2	AFE	UTR5	uORF,IRES@AluSx,ConservedRegion,uORF,IRES	diff
chr6:30882103:30882121:+,chr6:30882582:30882814:+@chr6:30680459:30680477:+,chr6:30680938:30681170:+	0.71	0.6	0.82	0.43	0.36	0.5	0.28	2124.05	(0,0):64360,(0,1):16,(1,0):42	0:42,1:16	(0,0):74047,(0,1):124,(1,0):93	0:93,1:124	chr6	ENST00000321897.5	VARS2	AFE	UTR5	ConservedRegion,uORF@SF2,ConservedRegion	diff
chr6:128326229:128326389:-@chr6:128841404:128841723:-,chr6:128812877:128812994:-,chr6:128718711:128718833:-	0.53	0.38	0.68	0.76	0.7	0.81	-0.23	8.1	(0,0):342,(0,1):56,(1,0):12	0:12,1:56	(0,0):1557,(0,1):139,(1,0):79	0:79,1:139	chr6	ENST00000368226.4	PTPRK	AFE	UTR5	NA@SF2,ConservedRegion	diff
chr6:31795512:31798031:+@chr6:31596988:31599510:+	0.83	0.83	0.84	0.94	0.94	0.95	-0.11	1000000000000	(0,0):52818,(0,1):1848,(1,0):9346	0:9346,1:1848	(0,0):135418,(0,1):3584,(1,0):60096	0:60096,1:3584	chr6	ENST00000375650	ENSG00000204388	AFE	UTR5	SF2,(T)n,ConservedRegion,IRES,SF2SAN_347@SF2,ConservedRegion,(CAG)n,SF2SAN_345	diff
chr6:44191296:44191378:+,chr6:44195000:44195079:+@chr6:44187242:44187519:+	0.63	0.5	0.75	0.84	0.77	0.9	-0.21	9.49	(0,0):252,(0,1):29,(1,0):22	0:22,1:29	(0,0):286,(0,1):20,(1,0):49	0:49,1:20	chr6	ENST00000393844.1	SLC29A1	AFE	UTR5	uORF@uORF	diff
chr6:31723123:31726070:+@chr6:31509193:31509258:+,chr6:31509650:31509809:+	0.06	0.04	0.1	0.18	0.12	0.27	-0.12	22.46	(0,0):45058,(0,1):28,(1,0):33	0:33,1:28	(0,0):68749,(0,1):22,(1,0):86	0:86,1:22	chr6	ENST00000375755.3	MSH5	AFE	UTR5	SF2,AluYc,uORF@ConservedRegion,uORF	diff
chr6:30882103:30882121:+,chr6:30882582:30882814:+@chr6:30679944:30681170:+	0.55	0.47	0.63	0.27	0.23	0.31	0.28	5.29317e+23	(0,0):64276,(0,1):220,(1,0):42	0:42,1:220	(0,0):73406,(0,1):1607,(1,0):93	0:93,1:1607	chr6	ENST00000321897.5	VARS2	AFE	UTR5	ConservedRegion,uORF@SF2,ConservedRegion	diff
chr6:31632006:31632320:-@chr6:31830395:31830709:-,chr6:31828965:31829227:-	0.49	0.45	0.54	0.34	0.3	0.39	0.15	5867.37	(0,0):51383,(0,1):326,(1,0):151	0:151,1:326	(0,0):164279,(0,1):448,(1,0):110	0:110,1:448	chr6	ENST00000375906.1	GPANK1	AFE	UTR5	SF2@SF2,IRES	diff
chr6:4061871:4062803:-@chr6:32820816:32821748:-	0.21	0.14	0.28	0.47	0.43	0.52	-0.26	1.25912e+17	(0,0):370340,(0,1):103,(1,0):26	0:26,1:103	(0,0):715706,(0,1):244,(1,0):218	0:218,1:244	chr6	ENST00000480058.1	PRPF4B	AFE	UTR5	hsa-miR-224,hsa-miR-634,ConservedRegion,hsa-miR-548c-5p,AT_rich,hsa-miR-605,PAS,hsa-miR-105,hsa-miR-661,hsa-miR-23b,hsa-miR-548c-3p,UNR-bs@SF2,ConservedRegion,uORF	diff
chr6:31632006:31632320:-,chr6:31630577:31630838:-@chr6:31830395:31830709:-,chr6:31828965:31829227:-	0.32	0.28	0.36	0.2	0.17	0.23	0.12	94.82	(0,0):51619,(0,1):326,(1,0):151	0:151,1:326	(0,0):164448,(0,1):448,(1,0):111	0:111,1:448	chr6	ENST00000375906.1	GPANK1	AFE	UTR5	SF2@SF2,IRES	diff
chr6:3264400:3264789:-,chr6:3263685:3264104:-@chr6:31763323:31763712:-,chr6:31762608:31763027:-	0.37	0.29	0.45	0.13	0.1	0.16	0.24	5.57922e+11	(0,0):315140,(0,1):81,(1,0):48	0:48,1:81	(0,0):549067,(0,1):482,(1,0):69	0:69,1:482	chr6	ENST00000454610.2	PSMG4	AFE	UTR5	PAS@SF2,ConservedRegion,GC_rich,uORF	diff
chr20:35126220:35127724:+,chr20:35127991:35128079:+,chr20:35128602:35129014:+@chr20:35090142:35091002:+	0.58	0.51	0.66	0.45	0.4	0.5	0.13	7.13	(0,0):190,(0,1):51,(1,0):178	0:178,1:51	(0,0):386,(0,1):132,(1,0):259	0:259,1:132	chr20	ENST00000373913.3	DLGAP4	AFE	UTR5	ConservedRegion,uORF@(CCCG)n,ConservedRegion,uORF	diff
chr20:2636762:2636860:+,chr20:2637047:2637195:+,chr20:2637420:2637541:+@chr20:2636241:2636392:+	0.55	0.51	0.59	0.66	0.64	0.69	-0.11	32407.3	(0,0):1013,(0,1):167,(1,0):770	0:770,1:167	(0,0):2256,(0,1):346,(1,0):2592	0:2592,1:346	chr20	ENST00000329276.5	NOP56	AFE	UTR5	SF2,ConservedRegion,IRES@NA	diff
chr20:2967411:2968751:+,chr20:2968984:2969120:+,chr20:2979977:2980071:+,chr20:2985702:2985792:+,chr20:2987990:2988066:+,chr20:2996495:2996531:+,chr20:2998462:2998559:+@chr20:2844825:2844933:+,chr20:2845011:2845108:+,chr20:2845193:2845300:+,chr20:2845624:2845701:+,chr20:2845794:2845963:+,chr20:2903853:2903931:+,chr20:2928628:2928670:+,chr20:2944918:2944996:+	0.48	0.43	0.53	0.23	0.21	0.25	0.25	4.11551e+69	(0,0):689,(0,1):128,(1,0):303	0:303,1:128	(0,0):1550,(0,1):586,(1,0):461	0:461,1:586	chr20	ENST00000380393.3	PTPRA	AFE	UTR5	NA@NA	diff
chr20:34219190:34219276:-,chr20:34219036:34219095:-,chr20:34218361:34218956:-@chr20:34241450:34241831:-	0.44	0.38	0.5	0.21	0.19	0.23	0.23	2.21765e+42	(0,0):1542,(0,1):111,(1,0):188	0:188,1:111	(0,0):6536,(0,1):737,(1,0):427	0:427,1:737	chr20	ENST00000352393.4	CPNE1	AFE	UTR5	NA@NA	diff
chr20:34219190:34219276:-,chr20:34219036:34219095:-,chr20:34218361:34218956:-@chr20:34246852:34246904:-,chr20:34243124:34243266:-	0.49	0.4	0.58	0.22	0.2	0.25	0.27	1.18525e+21	(0,0):2165,(0,1):37,(1,0):188	0:188,1:37	(0,0):10455,(0,1):270,(1,0):427	0:427,1:270	chr20	ENST00000352393.4	CPNE1	AFE	UTR5	NA@NA	diff
chr20:34219190:34219276:-,chr20:34219036:34219095:-,chr20:34218361:34218956:-@chr20:34252682:34252848:-,chr20:34246852:34246904:-,chr20:34243124:34243266:-	0.62	0.55	0.7	0.37	0.34	0.41	0.25	9.30254e+12	(0,0):2194,(0,1):49,(1,0):188	0:188,1:49	(0,0):10600,(0,1):309,(1,0):427	0:427,1:309	chr20	ENST00000352393.4	CPNE1	AFE	UTR5	NA@NA	diff
chr20:34219190:34219276:-,chr20:34219036:34219095:-,chr20:34218361:34218956:-@chr20:34252682:34252848:-,chr20:34246852:34246936:-,chr20:34243124:34243266:-	0.57	0.5	0.64	0.31	0.29	0.34	0.26	6.66291e+17	(0,0):2175,(0,1):68,(1,0):188	0:188,1:68	(0,0):10459,(0,1):450,(1,0):427	0:427,1:450	chr20	ENST00000352393.4	CPNE1	AFE	UTR5	NA@NA	diff
chr20:34219190:34219276:-,chr20:34219036:34219095:-,chr20:34218361:34218956:-@chr20:34252682:34252848:-,chr20:34246852:34246936:-	0.67	0.58	0.76	0.48	0.43	0.53	0.19	78.53	(0,0):2219,(0,1):24,(1,0):188	0:188,1:24	(0,0):10786,(0,1):123,(1,0):427	0:427,1:123	chr20	ENST00000352393.4	CPNE1	AFE	UTR5	NA@NA	diff
chr20:34219190:34219276:-,chr20:34219036:34219095:-,chr20:34218361:34218956:-@chr20:34252724:34252848:-,chr20:34243124:34243266:-	0.72	0.62	0.8	0.46	0.41	0.5	0.26	1.29989e+10	(0,0):2221,(0,1):22,(1,0):188	0:188,1:22	(0,0):10761,(0,1):148,(1,0):427	0:427,1:148	chr20	ENST00000352393.4	CPNE1	AFE	UTR5	NA@NA	diff
chr20:57478036:57478640:+@chr20:57464180:57464408:+,chr20:57470667:57470739:+	0.07	0.03	0.11	0.35	0.28	0.43	-0.28	1.69607e+32	(0,0):4683,(0,1):57,(1,0):8	0:8,1:57	(0,0):7142,(0,1):62,(1,0):77	0:77,1:62	chr20	ENST00000313949.7	GNAS	AFE	UTR5	AT_rich,ConservedRegion,PAS,hsa-miR-218@AT_rich,ConservedRegion,PAS,hsa-miR-218	diff
chr9:115946572:115946679:-@chr9:116037662:116037869:-,chr9:116035609:116035718:-,chr9:116034707:116034828:-,chr9:115985499:115985605:-	0.2	0.09	0.36	0.48	0.35	0.6	-0.28	5.14	(0,0):3115,(0,1):238,(1,0):4	0:4,1:238	(0,0):4891,(0,1):267,(1,0):18	0:18,1:267	chr9	ENST00000446284.1	FKBP15	AFE	UTR5	NA@SF2,ConservedRegion,uORF,IRES	diff
chr9:115983471:115983676:-,chr9:115973757:115973872:-,chr9:115968789:115968858:-,chr9:115965241:115965315:-@chr9:116037662:116037869:-,chr9:116035609:116035718:-,chr9:116034707:116034828:-,chr9:115985499:115985605:-	0.06	0.03	0.1	0.28	0.23	0.33	-0.22	1.6516e+41	(0,0):2980,(0,1):238,(1,0):13	0:13,1:238	(0,0):4239,(0,1):267,(1,0):84	0:84,1:267	chr9	ENST00000446284.1	FKBP15	AFE	UTR5	ConservedRegion@SF2,ConservedRegion,uORF,IRES	diff
chr9:98684587:98684700:+,chr9:98685542:98685661:+,chr9:98690433:98690559:+,chr9:98691001:98691146:+,chr9:98703736:98703831:+,chr9:98717010:98717204:+,chr9:98718196:98718295:+,chr9:98728844:98728996:+,chr9:98729741:98729907:+,chr9:98732858:98732938:+@chr9:98637900:98638366:+	0.17	0.11	0.25	0.38	0.33	0.45	-0.21	1875.06	(0,0):203,(0,1):37,(1,0):22	0:22,1:37	(0,0):836,(0,1):98,(1,0):188	0:188,1:98	chr9	ENST00000288985.7	ERCC6L2	AFE	UTR5	SF2@NA	diff
chr9:98684587:98684700:+,chr9:98685542:98685661:+,chr9:98690433:98690559:+,chr9:98691001:98691146:+,chr9:98703736:98703831:+,chr9:98717010:98717204:+,chr9:98718196:98718295:+,chr9:98728844:98728996:+,chr9:98729741:98729907:+,chr9:98732858:98732938:+@chr9:98637900:98638366:+,chr9:98643151:98643575:+,chr9:98660131:98660253:+,chr9:98677950:98678111:+	0.25	0.16	0.35	0.42	0.38	0.47	-0.17	17.42	(0,0):177,(0,1):63,(1,0):22	0:22,1:63	(0,0):704,(0,1):230,(1,0):188	0:188,1:230	chr9	ENST00000288985.7	ERCC6L2	AFE	UTR5	SF2@NA	diff
chr9:115983471:115983676:-@chr9:116037662:116037869:-,chr9:116035609:116035718:-,chr9:116034707:116034828:-,chr9:115985499:115985605:-	0.04	0.01	0.1	0.23	0.16	0.31	-0.19	1.87176e+06	(0,0):2942,(0,1):238,(1,0):2	0:2,1:238	(0,0):4119,(0,1):267,(1,0):22	0:22,1:267	chr9	ENST00000446284.1	FKBP15	AFE	UTR5	ConservedRegion@SF2,ConservedRegion,uORF,IRES	diff
chr9:139937379:139938544:-@chr9:139940330:139940655:-	0.35	0.27	0.43	0.62	0.54	0.69	-0.27	1.07786e+08	(0,0):190,(0,1):44,(1,0):99	0:99,1:44	(0,0):425,(0,1):43,(1,0):299	0:299,1:43	chr9	ENST00000371600.3	NPDC1	AFE	UTR5	SF2@ConservedRegion,IRES,CT-rich	diff
chr7:64289938:64289953:+,chr7:64291318:64291454:+,chr7:64291829:64293705:+@chr7:64254806:64254949:+,chr7:64275296:64275422:+,chr7:64275950:64276031:+	0.27	0.19	0.36	0.48	0.42	0.54	-0.21	125.51	(0,0):58,(0,1):23,(1,0):58	0:58,1:23	(0,0):194,(0,1):77,(1,0):492	0:492,1:77	chr7	ENST00000494380.1	ZNF138	AFE	UTR5	ConservedRegion,PAS@ConservedRegion,uORF,IRES	diff
chr7:134617739:134618828:+@chr7:134464171:134464500:+,chr7:134528635:134528722:+,chr7:134552444:134552555:+	0.77	0.67	0.85	0.61	0.57	0.64	0.16	10.17	(0,0):120,(0,1):15,(1,0):116	0:116,1:15	(0,0):814,(0,1):226,(1,0):772	0:772,1:226	chr7	ENST00000422748.1	CALD1	AFE	UTR5	SF2,ConservedRegion,PAS,polypurine,UNR-bs@MSTB,MLT2D,ConservedRegion,uORF	diff
chr7:99168971:99169002:+,chr7:99169311:99169415:+,chr7:99169868:99174077:+@chr7:99156045:99156410:+,chr7:99158156:99158318:+	0.25	0.21	0.3	0.47	0.43	0.5	-0.22	6.07276e+43	(0,0):412,(0,1):103,(1,0):321	0:321,1:103	(0,0):897,(0,1):217,(1,0):1784	0:1784,1:217	chr7	ENST00000252713.4	ZNF655	AFE	UTR5	SF2,ConservedRegion,AT_rich,BRD-BOX,PAS,AluSg,AluJr,(CA)n,UNR-bs@IRES,uORF	diff
chr7:99167822:99169415:+,chr7:99169868:99174077:+@chr7:99156045:99156410:+,chr7:99158156:99158318:+	0.21	0.18	0.25	0.41	0.37	0.44	-0.2	9.04763e+50	(0,0):396,(0,1):103,(1,0):337	0:337,1:103	(0,0):819,(0,1):217,(1,0):1862	0:1862,1:217	chr7	ENST00000252713.4	ZNF655	AFE	UTR5	SF2,ConservedRegion,AT_rich,BRD-BOX,PAS,AluSg,AluJr,(CA)n,UNR-bs@IRES,uORF	diff
chr7:64289938:64289953:+,chr7:64291318:64291454:+,chr7:64291829:64293705:+@chr7:64254806:64254949:+,chr7:64274437:64274525:+,chr7:64275296:64275422:+	0.38	0.25	0.53	0.61	0.54	0.67	-0.23	5.3	(0,0):66,(0,1):15,(1,0):58	0:58,1:15	(0,0):224,(0,1):47,(1,0):492	0:492,1:47	chr7	ENST00000494380.1	ZNF138	AFE	UTR5	ConservedRegion,PAS@ConservedRegion,uORF,IRES	diff
chr7:74221275:74221352:-,chr7:74219118:74219201:-,chr7:74216326:74216354:-,chr7:74210484:74212604:-@chr7:74267663:74267841:-,chr7:74251402:74251505:-,chr7:74247928:74248066:-,chr7:74239462:74239581:-,chr7:74237152:74237335:-,chr7:74236955:74236983:-,chr7:74234499:74234553:-,chr7:74227272:74227349:-	0.09	0.04	0.14	0.22	0.15	0.3	-0.13	9.28	(0,0):44,(0,1):43,(1,0):10	0:10,1:43	(0,0):88,(0,1):49,(1,0):37	0:37,1:49	chr7	ENST00000405086.2	GTF2IRD2	AFE	UTR5	PAS,AluSx,Charlie8@ConservedRegion,A-rich,GC_rich,IRES	diff
chr7:99168971:99169002:+,chr7:99169311:99169415:+,chr7:99169868:99174077:+@chr7:99156448:99156640:+,chr7:99158156:99158318:+	0.24	0.19	0.29	0.49	0.44	0.53	-0.25	1.15591e+41	(0,0):417,(0,1):69,(1,0):321	0:321,1:69	(0,0):949,(0,1):124,(1,0):1784	0:1784,1:124	chr7	ENST00000252713.4	ZNF655	AFE	UTR5	SF2,ConservedRegion,AT_rich,BRD-BOX,PAS,AluSg,AluJr,(CA)n,UNR-bs@IRES	diff
chr7:99167822:99169415:+,chr7:99169868:99174077:+@chr7:99156448:99156640:+,chr7:99158156:99158318:+	0.2	0.16	0.24	0.43	0.38	0.47	-0.23	3.30008e+11	(0,0):401,(0,1):69,(1,0):337	0:337,1:69	(0,0):871,(0,1):124,(1,0):1862	0:1862,1:124	chr7	ENST00000252713.4	ZNF655	AFE	UTR5	SF2,ConservedRegion,AT_rich,BRD-BOX,PAS,AluSg,AluJr,(CA)n,UNR-bs@IRES	diff
chr13:45010640:45010979:-@chr13:45147299:45150701:-	0.82	0.78	0.85	0.65	0.59	0.69	0.17	3.19112e+11	(0,0):88,(0,1):247,(1,0):92	0:92,1:247	(0,0):175,(0,1):691,(1,0):101	0:101,1:691	chr13	ENST00000458659.2	TSC22D1	AFE	UTR5	ConservedRegion,IRES@ConservedRegion,uORF	diff
chr13:45010640:45010979:-@chr13:45148548:45150392:-	0.81	0.76	0.84	0.63	0.58	0.68	0.18	4.06433e+08	(0,0):184,(0,1):144,(1,0):92	0:92,1:144	(0,0):470,(0,1):384,(1,0):101	0:101,1:384	chr13	ENST00000458659.2	TSC22D1	AFE	UTR5	ConservedRegion,IRES@ConservedRegion	diff
chr1:23638155:23638386:-,chr1:23637694:23637815:-@chr1:23670704:23670853:-,chr1:23667345:23667510:-	0.73	0.66	0.79	0.44	0.4	0.48	0.29	2.4755e+41	(0,0):2763,(0,1):44,(1,0):137	0:137,1:44	(0,0):6225,(0,1):296,(1,0):271	0:271,1:296	chr1	ENST00000478691.1	HNRNPR	AFE	UTR5	SF2@ConservedRegion,IRES	diff
chr1:23667345:23667510:-@chr1:23670704:23670853:-,chr1:23664983:23665101:-,chr1:23664247:23664354:-	0.11	0.06	0.16	0.39	0.36	0.43	-0.28	9.32701e+77	(0,0):293,(0,1):478,(1,0):17	0:17,1:478	(0,0):782,(0,1):1039,(1,0):205	0:205,1:1039	chr1	ENST00000478691.1	HNRNPR	AFE	UTR5	NA@SF2,ConservedRegion,IRES	diff
chr1:144921835:144922047:-,chr1:144918833:144918991:-,chr1:144917819:144917932:-@chr1:145075630:145076079:-	0.68	0.59	0.77	0.85	0.81	0.88	-0.17	53.47	(0,0):1065,(0,1):33,(1,0):81	0:81,1:33	(0,0):2829,(0,1):60,(1,0):371	0:371,1:60	chr1	ENST00000313382.9	PDE4DIP	AFE	UTR5	NA@uORF	diff
chr1:144894083:144894125:-,chr1:144892501:144892589:-,chr1:144886097:144886329:-@chr1:145075630:145076079:-	0.2	0.09	0.32	0.42	0.33	0.52	-0.22	7.66	(0,0):1680,(0,1):33,(1,0):6	0:6,1:33	(0,0):5408,(0,1):60,(1,0):34	0:34,1:60	chr1	ENST00000313382.9	PDE4DIP	AFE	UTR5	ConservedRegion@uORF	diff
chr1:151254791:151254871:+,chr1:151257682:151258550:+,chr1:151258751:151260882:+@chr1:151254094:151254555:+	0.58	0.51	0.66	0.77	0.72	0.82	-0.19	124.79	(0,0):76,(0,1):37,(1,0):406	0:406,1:37	(0,0):134,(0,1):49,(1,0):1267	0:1267,1:49	chr1	ENST00000443959.1	ZNF687	AFE	UTR5	ConservedRegion,uORF,IRES,AluSz,AluSc8@uORF	diff
chr1:151254791:151254871:+,chr1:151258751:151260882:+@chr1:151254094:151254555:+	0.66	0.58	0.74	0.82	0.78	0.86	-0.16	33.18	(0,0):85,(0,1):37,(1,0):397	0:397,1:37	(0,0):145,(0,1):49,(1,0):1256	0:1256,1:49	chr1	ENST00000443959.1	ZNF687	AFE	UTR5	ConservedRegion,IRES@uORF	diff
chr1:144921835:144922047:-,chr1:144918833:144918991:-,chr1:144917819:144917932:-@chr1:145039590:145039942:-,chr1:145021112:145021167:-,chr1:145017908:145018002:-,chr1:145015860:145016011:-,chr1:144994591:144994701:-	0.74	0.67	0.8	0.88	0.85	0.9	-0.14	317.29	(0,0):985,(0,1):47,(1,0):81	0:81,1:47	(0,0):2613,(0,1):84,(1,0):371	0:371,1:84	chr1	ENST00000313382.9	PDE4DIP	AFE	UTR5	NA@IRES	diff
chr1:144894083:144894125:-,chr1:144892501:144892589:-,chr1:144886097:144886329:-@chr1:145039590:145039942:-,chr1:145021112:145021167:-,chr1:145017908:145018002:-,chr1:145015860:145016011:-,chr1:144994591:144994701:-	0.24	0.1	0.41	0.48	0.39	0.57	-0.24	6.31	(0,0):1600,(0,1):47,(1,0):6	0:6,1:47	(0,0):5192,(0,1):84,(1,0):34	0:34,1:84	chr1	ENST00000313382.9	PDE4DIP	AFE	UTR5	ConservedRegion@IRES	diff
chr1:151258751:151260882:+@chr1:151254094:151254555:+	0.67	0.59	0.74	0.83	0.78	0.86	-0.16	219.1	(0,0):89,(0,1):37,(1,0):393	0:393,1:37	(0,0):154,(0,1):49,(1,0):1247	0:1247,1:49	chr1	ENST00000443959.1	ZNF687	AFE	UTR5	IRES@uORF	diff
chr1:148267841:148268013:-,chr1:148267018:148267126:-,chr1:148266217:148266389:-@chr1:148346582:148346791:-,chr1:148343594:148343808:-,chr1:148341795:148342006:-,chr1:148340238:148340447:-	0.48	0.37	0.6	0.67	0.63	0.71	-0.19	9.07	(0,0):506,(0,1):58,(1,0):27	0:27,1:58	(0,0):3339,(0,1):195,(1,0):198	0:198,1:195	chr1	ENST00000369202	ENSG00000203832	AFE	UTR5	SF2@SF2	diff
chr1:235897783:235901307:-@chr1:236030143:236030220:-,chr1:235996878:235996967:-,chr1:235992708:235993724:-	0.05	0.02	0.11	0.18	0.13	0.24	-0.13	18.89	(0,0):104,(0,1):25,(1,0):3	0:3,1:25	(0,0):1207,(0,1):72,(1,0):48	0:48,1:72	chr1	ENST00000473037.1	LYST	AFE	UTR5	ConservedRegion,uORF,L1MC4,L1MC5@NA	diff
chr1:144930584:144932032:-@chr1:145039590:145039942:-,chr1:145021112:145021167:-,chr1:145017908:145018002:-,chr1:145015860:145016011:-,chr1:144994591:144994701:-	0.73	0.67	0.78	0.84	0.81	0.86	-0.11	13.84	(0,0):478,(0,1):47,(1,0):252	0:252,1:47	(0,0):996,(0,1):84,(1,0):859	0:859,1:84	chr1	ENST00000313382.9	PDE4DIP	AFE	UTR5	SF2@IRES	diff
chr2:55831114:55831212:-,chr2:55825552:55826175:-@chr2:55844280:55845113:-	0.3	0.26	0.35	0.46	0.43	0.49	-0.16	3.98203e+09	(0,0):344,(0,1):271,(1,0):101	0:101,1:271	(0,0):785,(0,1):549,(1,0):398	0:398,1:549	chr2	ENST00000272313.5	SMEK2	AFE	UTR5	NA@ConservedRegion,uORF,(CCG)n	diff
chr2:110561556:110561708:+,chr2:110565751:110565981:+,chr2:110571037:110571232:+,chr2:110577273:110577360:+,chr2:110579627:110579691:+,chr2:110581799:110581980:+,chr2:110582064:110582239:+,chr2:110582387:110582530:+,chr2:110583453:110583611:+,chr2:110583878:110584015:+@chr2:110551742:110552114:+	0.6	0.42	0.78	0.87	0.81	0.92	-0.27	10.14	(0,0):41,(0,1):7,(1,0):50	0:50,1:7	(0,0):416,(0,1):15,(1,0):501	0:501,1:15	chr2	ENST00000393283.1	RGPD5	AFE	UTR5	NA@NA	diff
chr2:75928316:75928498:-,chr2:75923326:75923441:-,chr2:75921367:75921553:-,chr2:75917764:75917845:-,chr2:75917095:75917207:-@chr2:75937717:75938322:-	0.58	0.44	0.7	0.87	0.82	0.91	-0.29	1.69536e+07	(0,0):158,(0,1):23,(1,0):36	0:36,1:23	(0,0):523,(0,1):28,(1,0):213	0:213,1:28	chr2	ENST00000470197.1	GCFC2	AFE	UTR5	SF2,ConservedRegion,L3@uORF,IRES	diff
chr2:160289268:160290662:-@chr2:160472753:160473112:-,chr2:160412334:160412376:-,chr2:160335086:160335232:-	0.08	0.03	0.16	0.34	0.27	0.41	-0.26	2.32666e+13	(0,0):52,(0,1):24,(1,0):5	0:5,1:24	(0,0):377,(0,1):71,(1,0):98	0:98,1:71	chr2	ENST00000392782.1	BAZ2B	AFE	UTR5	NA@SF2,ConservedRegion,uORF	diff
chr2:110561555:110561707:-,chr2:110565750:110565980:-,chr2:110571036:110571231:-,chr2:110577272:110577359:-,chr2:110579626:110579690:-,chr2:110581798:110581979:-,chr2:110582063:110582238:-,chr2:110582386:110582529:-,chr2:110583452:110583610:-,chr2:110583877:110584014:-@chr2:110551035:110552113:-	0.65	0.49	0.81	0.9	0.85	0.93	-0.25	8.17	(0,0):58,(0,1):11,(1,0):31	0:31,1:11	(0,0):611,(0,1):23,(1,0):304	0:304,1:23	chr2	ENST00000393283.1	RGPD5	AFE	UTR5	NA@NA	diff
chr2:110561556:110561708:+,chr2:110565751:110565981:+,chr2:110571037:110571232:+,chr2:110577273:110577360:+,chr2:110579627:110579691:+,chr2:110581799:110581980:+,chr2:110582064:110582239:+,chr2:110582387:110582530:+,chr2:110583453:110583611:+,chr2:110583878:110584015:+@chr2:110551036:110552114:+	0.75	0.63	0.87	0.94	0.91	0.96	-0.19	16.08	(0,0):39,(0,1):11,(1,0):50	0:50,1:11	(0,0):414,(0,1):23,(1,0):501	0:501,1:23	chr2	ENST00000393283.1	RGPD5	AFE	UTR5	NA@NA	diff
chr17:41276754:41277131:-,chr17:41276034:41276132:-@chr17:41277288:41277468:-,chr17:41243452:41246877:-	0.42	0.29	0.56	0.23	0.19	0.27	0.19	5.77	(0,0):74,(0,1):138,(1,0):11	0:11,1:138	(0,0):700,(0,1):2171,(1,0):72	0:72,1:2171	chr17	ENST00000393691.2	BRCA1	AFE	UTR5	uORF,IRES,AluSg,(CAAAA)n@SF2,ConservedRegion	diff
chr17:7217807:7217916:-,chr17:7217610:7217722:-,chr17:7217399:7217478:-,chr17:7216887:7217307:-@chr17:7222369:7222527:-,chr17:7221814:7221993:-,chr17:7221588:7221675:-,chr17:7221384:7221491:-,chr17:7221107:7221251:-,chr17:7220780:7220892:-,chr17:7220524:7220689:-,chr17:7219595:7219646:-,chr17:7218650:7218974:-,chr17:7218278:7218438:-	0.91	0.9	0.92	0.77	0.75	0.78	0.14	1000000000000	(0,0):1111,(0,1):383,(1,0):1732	0:1732,1:383	(0,0):1228,(0,1):907,(1,0):1353	0:1353,1:907	chr17	ENST00000391950.3	GPS2	AFE	UTR5	SF2,ConservedRegion@ConservedRegion,GC_rich,IRES,uORF,PAS,GY-BOX	diff
chr17:59067332:59067596:+@chr17:58755172:58755275:+,chr17:58756814:58756901:+	0.96	0.9	0.99	0.84	0.77	0.89	0.12	5.8	(0,0):393,(0,1):1,(1,0):92	0:92,1:1	(0,0):936,(0,1):18,(1,0):148	0:148,1:18	chr17	ENST00000589222.1	BCAS3	AFE	UTR5	NA@ConservedRegion	diff
chr17:59445680:59445855:+,chr17:59469338:59470199:+@chr17:58755172:58755275:+,chr17:58756814:58756901:+	0.96	0.9	1	0.81	0.73	0.88	0.15	6.45	(0,0):1041,(0,1):1,(1,0):394	0:394,1:1	(0,0):2203,(0,1):18,(1,0):638	0:638,1:18	chr17	ENST00000589222.1	BCAS3	AFE	UTR5	ConservedRegion,PAS@ConservedRegion	diff
chr10:22610140:22610625:+,chr10:22615360:22615490:+@chr10:22605299:22605485:+	0.24	0.19	0.3	0.47	0.41	0.54	-0.23	3350239311947020	(0,0):1206,(0,1):81,(1,0):122	0:122,1:81	(0,0):1212,(0,1):77,(1,0):328	0:328,1:77	chr10	ENST00000376663.3	BMI1	AFE	UTR5	ConservedRegion,IRES,uORF,GA-rich@ConservedRegion	diff
chr10:102676327:102677057:+@chr10:102672326:102673007:+	0.49	0.41	0.58	0.74	0.69	0.78	-0.25	5.46396e+07	(0,0):73,(0,1):60,(1,0):64	0:64,1:60	(0,0):172,(0,1):111,(1,0):336	0:336,1:111	chr10	ENST00000238961.3	FAM178A	AFE	UTR5	SF2@ConservedRegion,uORF	diff
chr16:10622435:10624568:-@chr16:10674406:10674539:-,chr16:10641397:10641534:-	0.35	0.3	0.41	0.48	0.43	0.55	-0.13	22.94	(0,0):838,(0,1):77,(1,0):434	0:434,1:77	(0,0):1206,(0,1):76,(1,0):736	0:736,1:76	chr16	ENST00000359543.3	EMP2	AFE	UTR5	ConservedRegion,L2a,AluSx,AluSp@ConservedRegion	diff
chr16:89343886:89346124:-@chr16:89556653:89556969:-,chr16:89497664:89497734:-,chr16:89484692:89484776:-,chr16:89383341:89383486:-	0.06	0.03	0.08	0.29	0.25	0.33	-0.23	3.32086e+104	(0,0):1423,(0,1):83,(1,0):18	0:18,1:83	(0,0):6527,(0,1):179,(1,0):289	0:289,1:179	chr16	ENST00000378330.2	ANKRD11	AFE	UTR5	NA@SF2,ConservedRegion,GC_rich,uORF	diff
chr16:89343886:89346124:-@chr16:89556653:89556969:-,chr16:89484692:89484776:-,chr16:89383341:89383486:-,chr16:89379725:89379997:-,chr16:89371614:89371752:-	0.05	0.03	0.08	0.26	0.23	0.29	-0.21	7.92917e+108	(0,0):1361,(0,1):145,(1,0):18	0:18,1:145	(0,0):6367,(0,1):339,(1,0):289	0:289,1:339	chr16	ENST00000378330.2	ANKRD11	AFE	UTR5	NA@SF2,ConservedRegion,GC_rich,uORF	diff
chr16:89343886:89346124:-@chr16:89386384:89386764:-,chr16:89383341:89383483:-	0.07	0.04	0.1	0.32	0.28	0.36	-0.25	2.32503e+99	(0,0):1411,(0,1):60,(1,0):18	0:18,1:60	(0,0):6478,(0,1):131,(1,0):289	0:289,1:131	chr16	ENST00000378330.2	ANKRD11	AFE	UTR5	NA@SF2	diff
chr16:89343886:89346124:-@chr16:89556653:89556969:-,chr16:89484692:89484776:-,chr16:89383341:89383486:-	0.04	0.02	0.06	0.23	0.2	0.26	-0.19	4.82293e+94	(0,0):1407,(0,1):99,(1,0):18	0:18,1:99	(0,0):6493,(0,1):213,(1,0):289	0:289,1:213	chr16	ENST00000378330.2	ANKRD11	AFE	UTR5	NA@SF2,ConservedRegion,GC_rich,uORF	diff
chr16:89343886:89346124:-@chr16:89556653:89556969:-,chr16:89484692:89484776:-,chr16:89383341:89383483:-	0.05	0.03	0.07	0.24	0.21	0.27	-0.19	5.53786e+93	(0,0):1418,(0,1):88,(1,0):18	0:18,1:88	(0,0):6501,(0,1):205,(1,0):289	0:289,1:205	chr16	ENST00000378330.2	ANKRD11	AFE	UTR5	NA@SF2,ConservedRegion,GC_rich,uORF	diff
chr16:75674082:75674247:-,chr16:75670352:75670445:-@chr16:75681476:75681577:-,chr16:75678181:75678360:-	0.66	0.62	0.71	0.8	0.77	0.83	-0.14	8.23288e+08	(0,0):423,(0,1):132,(1,0):235	0:235,1:132	(0,0):947,(0,1):155,(1,0):551	0:551,1:155	chr16	ENST00000319410.5	KARS	AFE	UTR5	NA@uORF	diff
chr4:95505552:95506154:+,chr4:95506716:95506888:+,chr4:95507559:95507595:+,chr4:95539155:95539342:+@chr4:95373038:95373146:+,chr4:95376398:95376535:+	0.1	0.06	0.15	0.32	0.28	0.37	-0.22	1.07094e+21	(0,0):170,(0,1):43,(1,0):25	0:25,1:43	(0,0):1118,(0,1):126,(1,0):314	0:314,1:126	chr4	ENST00000437932.1	PDLIM5	AFE	UTR5	SF2@ConservedRegion	diff
chr4:129918359:129918440:-,chr4:129913322:129913392:-,chr4:129891533:129891623:-,chr4:129886382:129886473:-,chr4:129880755:129880932:-,chr4:129878181:129878279:-,chr4:129873924:129873995:-,chr4:129873498:129873687:-@chr4:130014225:130014764:-	0.04	0.01	0.09	0.28	0.22	0.33	-0.24	8.07697e+24	(0,0):166,(0,1):50,(1,0):3	0:3,1:50	(0,0):415,(0,1):130,(1,0):85	0:85,1:130	chr4	ENST00000281142.5	SCLT1	AFE	UTR5	uORF@ConservedRegion,uORF,IRES	diff
chr4:187517694:187518385:-@chr4:187647508:187647850:-,chr4:187627717:187630999:-	0.76	0.68	0.83	0.63	0.6	0.66	0.13	9.15	(0,0):342,(0,1):55,(1,0):32	0:32,1:55	(0,0):4250,(0,1):1064,(1,0):310	0:310,1:1064	chr4	ENST00000500085.2	FAT1	AFE	UTR5	ConservedRegion@IRES	diff
chr4:187516843:187516980:-,chr4:187513847:187513906:-@chr4:187647508:187647850:-,chr4:187627717:187630999:-	0.75	0.58	0.87	0.5	0.41	0.57	0.25	5.77	(0,0):379,(0,1):55,(1,0):7	0:7,1:55	(0,0):4630,(0,1):1064,(1,0):38	0:38,1:1064	chr4	ENST00000509927.1	FAT1	AFE	UTR5	NA@IRES	diff
chr6:31750440:31750624:+@chr6:31948781:31949223:+	0.39	0.3	0.48	0.81	0.77	0.85	-0.42	4.1298e+75	(0,0):39291,(0,1):165,(1,0):32	0:32,1:165	(0,0):159336,(0,1):126,(1,0):167	0:167,1:126	chr6	ENST00000375663.3	VARS	ALE	UTR3	ConservedRegion,uORF@SF2,ConservedRegion,IRES,uORF	diff
chr6:99930138:99930759:-@chr6:99880185:99883722:-	0.7	0.56	0.8	0.36	0.28	0.44	0.34	5761.13	(0,0):69,(0,1):46,(1,0):18	0:18,1:46	(0,0):464,(0,1):379,(1,0):34	0:34,1:379	chr6	ENST00000496518.2	USP45	ALE	UTR3	MIR3,MIRb,PAS@ConservedRegion,MLT1A0,AT_rich,BRD-BOX,PAS,MER113A,AluJr,GY-BOX	diff
chr6:90571845:90574090:+@chr6:90583522:90584155:+	0.37	0.25	0.52	0.74	0.71	0.78	-0.37	1.16939e+12	(0,0):73,(0,1):16,(1,0):34	0:34,1:16	(0,0):1894,(0,1):114,(1,0):1279	0:1279,1:114	chr6	ENST00000552401.1	CASP8AP2	ALE	UTR3	NA@NA	diff
chr6:32793187:32796682:-@chr6:4034241:4037865:-	0.94	0.88	0.97	0.57	0.53	0.61	0.37	1.07171e+137	(0,0):369397,(0,1):6,(1,0):92	0:92,1:6	(0,0):717105,(0,1):240,(1,0):309	0:309,1:240	chr6	ENST00000374899.4	TAP2	ALE	UTR3	(GGGTG)n,ConservedRegion,AT_rich,BRD-BOX,PAS,AmnSINE2,L2,L1ME4a,GY-BOX,MIRb,UNR-bs,L2c@SF2,UNR-bs	diff
chr6:32793187:32796811:-@chr6:4034241:4037865:-	0.94	0.89	0.98	0.6	0.56	0.64	0.34	1.08562e+140	(0,0):369397,(0,1):6,(1,0):109	0:109,1:6	(0,0):717101,(0,1):240,(1,0):357	0:357,1:240	chr6	ENST00000374899.4	TAP2	ALE	UTR3	(GGGTG)n,ConservedRegion,AT_rich,BRD-BOX,PAS,AmnSINE2,L2,L1ME4a,MIRb,GY-BOX,L2c,UNR-bs@SF2,UNR-bs	diff
chr6:27356538:27357613:+@chr6:27368072:27369227:+	0.49	0.36	0.63	0.14	0.1	0.19	0.35	3.71881e+08	(0,0):40,(0,1):31,(1,0):27	0:27,1:31	(0,0):106,(0,1):201,(1,0):30	0:30,1:201	chr6	ENST00000244576.4	ZNF391	ALE	UTR3	NA@SF2,ConservedRegion,uORF	diff
chr6:99858451:99860194:-@chr6:99847841:99849506:-	0.55	0.47	0.63	0.22	0.2	0.25	0.33	5.55004e+57	(0,0):99,(0,1):65,(1,0):84	0:84,1:65	(0,0):1303,(0,1):1012,(1,0):305	0:305,1:1012	chr6	ENST00000369239.5	PNISR	ALE	UTR3	NA@ConservedRegion,AT_rich,PAS,(TAG)n,K-BOX,A-rich,UNR-bs	diff
chr6:31750440:31750624:+@chr6:31948781:31948965:+	0.38	0.28	0.47	0.81	0.76	0.86	-0.43	1.34988e+37	(0,0):39334,(0,1):54,(1,0):32	0:32,1:54	(0,0):159374,(0,1):38,(1,0):167	0:167,1:38	chr6	ENST00000375663.3	VARS	ALE	UTR3	ConservedRegion,uORF@SF2,ConservedRegion,uORF	diff
chr6:31608799:31609020:+@chr6:31807320:31807539:+	0.17	0.13	0.2	0.51	0.47	0.55	-0.34	3.17868e+203	(0,0):54996,(0,1):388,(1,0):79	0:79,1:388	(0,0):176918,(0,1):300,(1,0):318	0:318,1:300	chr6	ENST00000375976.4	BAG6	ALE	UTR3	SF2,ConservedRegion@ConservedRegion,PAS	diff
chr12:113382281:113383120:+@chr12:113407767:113411055:+	0.54	0.33	0.73	0.23	0.15	0.33	0.31	6.8	(0,0):24,(0,1):23,(1,0):7	0:7,1:23	(0,0):216,(0,1):202,(1,0):14	0:14,1:202	chr12	ENST00000228928.7	OAS3	ALE	UTR3	NA@L1M5,PAS,L1MB7,LTR67B,MER117,HERV16-int,(TG)n,UNR-bs	diff
chr12:62728947:62730463:+@chr12:62797973:62799898:+	0.64	0.53	0.74	0.3	0.25	0.35	0.34	1.4984e+13	(0,0):69,(0,1):29,(1,0):41	0:41,1:29	(0,0):1068,(0,1):270,(1,0):88	0:88,1:270	chr12	ENST00000353364.3	USP15	ALE	UTR3	PAS,Charlie1a,K-BOX,MER91C@hsa-miR-30c,hsa-miR-579,(T)n,ConservedRegion,uORF,IRES,PAS,hsa-miR-105,hsa-miR-196b,hsa-miR-26a,hsa-miR-16,hsa-miR-15b,hsa-miR-26b,hsa-miR-135a	diff
chr21:40668365:40670508:-@chr21:40562148:40562968:-,chr21:40562976:40569341:-	0.95	0.94	0.96	0.59	0.57	0.61	0.36	1000000000000	(0,0):163,(0,1):106,(1,0):647	0:647,1:106	(0,0):2357,(0,1):1925,(1,0):822	0:822,1:1925	chr21	ENST00000333229.2	BRWD1	ALE	UTR3	NA@SF2,hsa-miR-559,ConservedRegion,hsa-miR-605,hsa-miR-597,PAS,hsa-miR-7,K-BOX,hsa-miR-26a,UNR-bs,hsa-miR-592	diff
chr21:40668365:40670508:-@chr21:40574251:40574471:-	0.9	0.81	0.97	0.5	0.43	0.57	0.4	5.79635e+34	(0,0):134,(0,1):4,(1,0):647	0:647,1:4	(0,0):1825,(0,1):58,(1,0):822	0:822,1:58	chr21	ENST00000333229.2	BRWD1	ALE	UTR3	NA@ConservedRegion	diff
chrX:76937012:76938943:-@chrX:76760356:76764107:-	0.29	0.15	0.44	0.63	0.61	0.65	-0.34	3957.25	(0,0):40,(0,1):44,(1,0):8	0:8,1:44	(0,0):1808,(0,1):978,(1,0):833	0:833,1:978	chrX	ENST00000373344.4	ATRX	ALE	UTR3	SF2@(A)n,MARNA,ConservedRegion,BRD-BOX,PAS,K-BOX	diff
chrX:54200222:54200579:-@chrX:54094757:54099720:-	0.88	0.82	0.92	0.57	0.49	0.65	0.31	1.04866e+22	(0,0):58,(0,1):71,(1,0):31	0:31,1:71	(0,0):390,(0,1):480,(1,0):38	0:38,1:480	chrX	ENST00000375180.2	FAM120C	ALE	UTR3	ConservedRegion,PAS,MLT1F2@(CATA)n,ConservedRegion,AT_rich,PAS,(CTATT)n,K-BOX,(TG)n	diff
chr7:150734328:150734646:+@chr7:150742296:150744869:+	0.63	0.56	0.7	0.33	0.24	0.43	0.3	3.22775e+10	(0,0):363,(0,1):273,(1,0):47	0:47,1:273	(0,0):455,(0,1):391,(1,0):19	0:19,1:391	chr7	ENST00000358849.4	ABCB8	ALE	UTR3	NA@PAS,K-BOX,L1MC,GY-BOX,L2c	diff
chr7:156447270:156447615:+@chr7:156469113:156469820:+	0.65	0.48	0.8	0.24	0.09	0.41	0.41	215.65	(0,0):262,(0,1):15,(1,0):12	0:12,1:15	(0,0):754,(0,1):32,(1,0):4	0:4,1:32	chr7	ENST00000432459.2	RNF32	ALE	UTR3	NA@ConservedRegion,AT_rich,PAS	diff
chr7:156447270:156447615:+@chr7:156468989:156469812:+	0.64	0.48	0.78	0.2	0.09	0.36	0.44	8736.71	(0,0):259,(0,1):18,(1,0):12	0:12,1:18	(0,0):738,(0,1):48,(1,0):4	0:4,1:48	chr7	ENST00000432459.2	RNF32	ALE	UTR3	NA@ConservedRegion,AT_rich,PAS,K-BOX	diff
chr7:105400636:105401909:-@chr7:105245221:105248337:-	0.59	0.42	0.73	0.29	0.19	0.39	0.3	16.72	(0,0):88,(0,1):27,(1,0):16	0:16,1:27	(0,0):237,(0,1):114,(1,0):18	0:18,1:114	chr7	ENST00000419735.3	ATXN7L1	ALE	UTR3	NA@NA	diff
chr11:76164358:76164969:+@chr11:76169227:76172033:+	0.82	0.7	0.91	0.47	0.31	0.64	0.35	233.09	(0,0):15,(0,1):13,(1,0):14	0:14,1:13	(0,0):70,(0,1):50,(1,0):9	0:9,1:50	chr11	ENST00000427574.2	C11orf30	ALE	UTR3	NA@ConservedRegion,BRD-BOX,AluSx,MIRb	diff
chr11:76164358:76164969:+@chr11:76260996:76262589:+	0.4	0.27	0.55	0.1	0.05	0.16	0.3	113813	(0,0):207,(0,1):59,(1,0):14	0:14,1:59	(0,0):1049,(0,1):249,(1,0):9	0:9,1:249	chr11	ENST00000427574.2	C11orf30	ALE	UTR3	NA@hsa-miR-595,ConservedRegion,PAS,K-BOX	diff
chr11:76164358:76164969:+@chr11:76207259:76208275:+	0.7	0.52	0.84	0.21	0.11	0.33	0.49	487.8	(0,0):60,(0,1):9,(1,0):14	0:14,1:9	(0,0):303,(0,1):61,(1,0):9	0:9,1:61	chr11	ENST00000427574.2	C11orf30	ALE	UTR3	NA@NA	diff
chr11:62283374:62301546:-@chr11:62201016:62201363:-	0.65	0.46	0.85	0.97	0.94	1	-0.32	426.35	(0,0):7,(0,1):5,(1,0):602	0:602,1:5	(0,0):56,(0,1):1,(1,0):5739	0:5739,1:1	chr11	ENST00000257247.7	AHNAK	ALE	UTR3	ConservedRegion,PAS@ConservedRegion,PAS	diff
chr11:67933186:67934645:-@chr11:67923507:67926638:-	0.84	0.8	0.88	0.52	0.49	0.56	0.32	3.93396e+185	(0,0):13,(0,1):62,(1,0):157	0:157,1:62	(0,0):78,(0,1):634,(1,0):316	0:316,1:634	chr11	ENST00000441488.2	SUV420H1	ALE	UTR3	ConservedRegion,PAS,K-BOX,UNR-bs@hsa-miR-548d-3p,ConservedRegion,BRD-BOX,hsa-miR-106b,PAS,hsa-miR-93	diff
chr11:67933213:67933415:-@chr11:67923507:67926638:-	0.9	0.86	0.94	0.59	0.51	0.67	0.31	2.1603e+27	(0,0):20,(0,1):62,(1,0):26	0:26,1:62	(0,0):77,(0,1):634,(1,0):40	0:40,1:634	chr11	ENST00000441488.2	SUV420H1	ALE	UTR3	ConservedRegion@hsa-miR-548d-3p,ConservedRegion,BRD-BOX,hsa-miR-106b,PAS,hsa-miR-93	diff
chr11:82868231:82869913:+@chr11:82895721:82896835:+	0.83	0.77	0.89	0.48	0.43	0.53	0.35	4.18692e+65	(0,0):167,(0,1):20,(1,0):162	0:162,1:20	(0,0):1851,(0,1):184,(1,0):261	0:261,1:184	chr11	ENST00000298281.4	PCF11	ALE	UTR3	ConservedRegion,IRES@ConservedRegion,AT_rich,PAS	diff
chr16:89864767:89865487:-@chr16:89803959:89805116:-	0.63	0.59	0.68	0.23	0.2	0.26	0.4	1.58065e+290	(0,0):959,(0,1):210,(1,0):215	0:215,1:210	(0,0):3733,(0,1):757,(1,0):135	0:135,1:757	chr16	ENST00000389301.3	FANCA	ALE	UTR3	PAS@hsa-miR-595,ConservedRegion,PAS,hsa-miR-105,hsa-miR-26a,hsa-miR-26b	diff
chr16:89864794:89865640:-@chr16:89803959:89805116:-	0.6	0.56	0.65	0.21	0.18	0.24	0.39	1.42034e+281	(0,0):979,(0,1):210,(1,0):229	0:229,1:210	(0,0):3809,(0,1):757,(1,0):143	0:143,1:757	chr16	ENST00000389301.3	FANCA	ALE	UTR3	PAS@hsa-miR-595,ConservedRegion,PAS,hsa-miR-105,hsa-miR-26a,hsa-miR-26b	diff
chr16:89353070:89355078:-@chr16:89334035:89335071:-	0.79	0.74	0.83	0.38	0.35	0.4	0.41	2.9244e+304	(0,0):353,(0,1):57,(1,0):424	0:424,1:57	(0,0):4881,(0,1):535,(1,0):650	0:650,1:535	chr16	ENST00000378330.2	ANKRD11	ALE	UTR3	NA@AT_rich,ConservedRegion,PAS,hsa-miR-101	diff
chr16:89353070:89353521:-@chr16:89334035:89335071:-	0.77	0.7	0.83	0.36	0.32	0.41	0.41	2.48808e+108	(0,0):353,(0,1):57,(1,0):76	0:76,1:57	(0,0):4800,(0,1):535,(1,0):119	0:119,1:535	chr16	ENST00000378330.2	ANKRD11	ALE	UTR3	NA@AT_rich,ConservedRegion,PAS,hsa-miR-101	diff
chr16:89365283:89367370:-@chr16:89334035:89335071:-	0.75	0.69	0.8	0.34	0.31	0.36	0.41	1.51642e+260	(0,0):982,(0,1):57,(1,0):351	0:351,1:57	(0,0):6192,(0,1):535,(1,0):565	0:565,1:535	chr16	ENST00000378330.2	ANKRD11	ALE	UTR3	PAS@AT_rich,ConservedRegion,PAS,hsa-miR-101	diff
chr16:4404543:4405164:-@chr16:4390252:4390406:-	0.05	0.04	0.07	0.37	0.31	0.43	-0.32	8.09597e+99	(0,0):1346,(0,1):112,(1,0):42	0:42,1:112	(0,0):1091,(0,1):69,(1,0):264	0:264,1:69	chr16	ENST00000251166.4	CORO7	ALE	UTR3	ConservedRegion,PAS@ConservedRegion,PAS	diff
chr16:24560266:24560722:+@chr16:24582197:24584183:+	0.76	0.62	0.87	0.14	0.1	0.19	0.62	2.71216e+66	(0,0):125,(0,1):17,(1,0):12	0:12,1:17	(0,0):2057,(0,1):908,(1,0):30	0:30,1:908	chr16	ENST00000564314.1	RBBP6	ALE	UTR3	ConservedRegion,PAS@ConservedRegion,hsa-miR-561,BRD-BOX,PAS,hsa-miR-16,hsa-miR-15b,hsa-miR-548c-3p	diff
chr16:47483751:47484364:-@chr16:47189298:47189689:-	0.62	0.49	0.74	0.3	0.24	0.37	0.32	9044.08	(0,0):286,(0,1):16,(1,0):44	0:44,1:16	(0,0):1055,(0,1):89,(1,0):64	0:64,1:89	chr16	ENST00000320640.6	ITFG1	ALE	UTR3	5S@ConservedRegion,PAS	diff
chr5:139851824:139852062:+@chr5:139905581:139906028:+	0.53	0.38	0.68	0.18	0.13	0.24	0.35	118461	(0,0):253,(0,1):27,(1,0):14	0:14,1:27	(0,0):2548,(0,1):293,(1,0):28	0:28,1:293	chr5	ENST00000360839.2	ANKHD1	ALE	UTR3	NA@SF2	diff
chr5:1468400:1471468:+@chr5:70805292:70807178:+	0.65	0.54	0.75	0.13	0.11	0.15	0.52	2.63285e+102	(0,0):142349,(0,1):19,(1,0):59	0:59,1:19	(0,0):401027,(0,1):684,(1,0):163	0:163,1:684	chr5	ENST00000283415.3	LPCAT1	ALE	UTR3	NA@SF2	diff
chr5:139851824:139852062:+@chr5:139918944:139919441:+	0.66	0.48	0.78	0.32	0.23	0.41	0.34	146.86	(0,0):646,(0,1):17,(1,0):14	0:14,1:17	(0,0):5927,(0,1):154,(1,0):28	0:28,1:154	chr5	ENST00000360839.2	ANKHD1	ALE	UTR3	NA@NA	diff
chr4:129957750:129959281:-@chr4:129805152:129805694:-	0.7	0.52	0.85	0.37	0.27	0.48	0.33	34.65	(0,0):54,(0,1):4,(1,0):37	0:37,1:4	(0,0):347,(0,1):26,(1,0):47	0:47,1:26	chr4	ENST00000281142.5	SCLT1	ALE	UTR3	L1M5,PAS,AluY,(TTTTA)n,LTR67B@ConservedRegion,PAS	diff
chr4:13600570:13606708:-@chr4:13570366:13571752:-	0.22	0.12	0.36	0.59	0.56	0.61	-0.37	437.23	(0,0):15,(0,1):15,(1,0):18	0:18,1:15	(0,0):630,(0,1):365,(1,0):2383	0:2383,1:365	chr4	ENST00000040738.5	BOD1L1	ALE	UTR3	SF2@SF2,ConservedRegion,AT_rich,BRD-BOX,PAS	diff
chr2:110935623:110936124:-@chr2:110880914:110881640:-	0.88	0.74	0.96	0.54	0.42	0.66	0.34	305.99	(0,0):33,(0,1):4,(1,0):22	0:22,1:4	(0,0):215,(0,1):34,(1,0):27	0:27,1:34	chr2	ENST00000316534.4	NPHP1	ALE	UTR3	BRD-BOX,PAS,L2c@ConservedRegion,AT_rich,PAS,L1M4	diff
chr2:11720830:11721390:+@chr2:11780417:11782912:+	0.79	0.67	0.89	0.19	0.07	0.34	0.6	1.92186e+10	(0,0):60,(0,1):17,(1,0):15	0:15,1:17	(0,0):251,(0,1):105,(1,0):4	0:4,1:105	chr2	ENST00000263834.5	GREB1	ALE	UTR3	PAS,MIRb@ConservedRegion,PAS,AluY,AluSq2,MIRc	diff
chr2:138724667:138725014:+@chr2:138771345:138773934:+	0.83	0.74	0.9	0.49	0.33	0.64	0.34	201.32	(0,0):29,(0,1):32,(1,0):18	0:18,1:32	(0,0):88,(0,1):89,(1,0):10	0:10,1:89	chr2	ENST00000329366.4	HNMT	ALE	UTR3	PAS,AluJo@ConservedRegion,AT_rich,PAS,K-BOX,L2b	diff
chr2:145268958:145271364:-@chr2:145184381:145187593:-	0.66	0.49	0.81	0.34	0.26	0.43	0.32	25.43	(0,0):10,(0,1):12,(1,0):18	0:18,1:12	(0,0):73,(0,1):100,(1,0):39	0:39,1:100	chr2	ENST00000303660.3	ZEB2	ALE	UTR3	NA@ConservedRegion	diff
chr3:37365079:37369316:+@chr3:37407571:37408242:+,chr3:37402734:37402796:+	0.16	0.08	0.26	0.53	0.49	0.56	-0.37	2.32439e+26	(0,0):14,(0,1):17,(1,0):18	0:18,1:17	(0,0):494,(0,1):230,(1,0):1609	0:1609,1:230	chr3	ENST00000361924.2	GOLGA4	ALE	UTR3	NA@ConservedRegion,PAS,K-BOX	diff
chr3:37365079:37369316:+@chr3:37407571:37408242:+	0.18	0.1	0.29	0.53	0.49	0.57	-0.35	7.32448e+11	(0,0):17,(0,1):14,(1,0):18	0:18,1:14	(0,0):521,(0,1):203,(1,0):1609	0:1609,1:203	chr3	ENST00000361924.2	GOLGA4	ALE	UTR3	NA@ConservedRegion,PAS,K-BOX	diff
chr3:121412588:121417776:-@chr3:121382048:121383461:-	0.16	0.1	0.23	0.53	0.5	0.55	-0.37	9.44876e+53	(0,0):58,(0,1):35,(1,0):23	0:23,1:35	(0,0):1785,(0,1):580,(1,0):2469	0:2469,1:580	chr3	ENST00000340645.5	GOLGB1	ALE	UTR3	SF2,ConservedRegion,PAS,SF2SAN_220,GY-BOX@ConservedRegion,PAS,GY-BOX	diff
chr19:37209850:37211463:+@chr19:37214091:37214248:+	0.55	0.35	0.79	0.9	0.81	0.96	-0.35	7.09	(0,0):45,(0,1):5,(1,0):104	0:104,1:5	(0,0):223,(0,1):3,(1,0):662	0:662,1:3	chr19	ENST00000536254.2	ZNF567	ALE	UTR3	NA@PAS	diff
chr19:37209850:37212225:+@chr19:37214091:37214248:+	0.53	0.34	0.75	0.89	0.8	0.96	-0.36	16.33	(0,0):8,(0,1):5,(1,0):141	0:141,1:5	(0,0):52,(0,1):3,(1,0):833	0:833,1:3	chr19	ENST00000536254.2	ZNF567	ALE	UTR3	ConservedRegion,AT_rich,PAS,L1ME3F@PAS	diff
chr19:38024210:38027432:+@chr19:38027799:38034239:+	0.59	0.52	0.67	0.28	0.25	0.32	0.31	2.45222e+34	(0,0):15,(0,1):86,(1,0):62	0:62,1:86	(0,0):77,(0,1):693,(1,0):135	0:135,1:693	chr19	ENST00000588578.1	ZNF793	ALE	UTR3	NA@AT_rich,ConservedRegion,PAS,L1ME3F,L1MA2,AluY,AluSx,AluSq2,K-BOX,AluSg,L1ME3C,AluSx1,UNR-bs	diff
chr19:38024210:38027432:+@chr19:38033110:38034200:+	0.62	0.49	0.75	0.28	0.24	0.34	0.34	1.46094e+10	(0,0):89,(0,1):12,(1,0):62	0:62,1:12	(0,0):658,(0,1):112,(1,0):135	0:135,1:112	chr19	ENST00000588578.1	ZNF793	ALE	UTR3	NA@AT_rich,ConservedRegion,L1ME3F,K-BOX,L1ME3C,AluSx1,UNR-bs	diff
chr19:52877737:52877969:+@chr19:52887102:52888070:+	0.82	0.69	0.9	0.5	0.32	0.67	0.32	24.11	(0,0):164,(0,1):14,(1,0):13	0:13,1:14	(0,0):143,(0,1):39,(1,0):7	0:7,1:39	chr19	ENST00000344085.5	ZNF880	ALE	UTR3	PAS,AluJo@ConservedRegion	diff
chr19:37875770:37876541:+@chr19:37879208:37883966:+	0.45	0.35	0.56	0.13	0.07	0.18	0.32	1.17056e+12	(0,0):18,(0,1):194,(1,0):24	0:24,1:194	(0,0):68,(0,1):750,(1,0):16	0:16,1:750	chr19	ENST00000483919.1	ZNF527	ALE	UTR3	L1M5,PAS,AluJo@ConservedRegion,PAS,K-BOX,AluSp,MLT1K,AluJb,AluSx1	diff
chr8:133823291:133825439:+@chr8:133858026:133861052:+	0.53	0.44	0.61	0.2	0.17	0.24	0.33	3.00336e+31	(0,0):128,(0,1):69,(1,0):54	0:54,1:69	(0,0):994,(0,1):644,(1,0):116	0:116,1:644	chr8	ENST00000337920.4	PHF20L1	ALE	UTR3	AT_rich,ConservedRegion,PAS,K-BOX,hsa-miR-190@hsa-miR-579,SF2,ConservedRegion,BRD-BOX,PAS,hsa-miR-101,hsa-miR-190	diff
chr8:38173935:38175556:-@chr8:38132561:38133400:-	0.71	0.62	0.79	0.41	0.37	0.45	0.3	5.31719e+09	(0,0):122,(0,1):23,(1,0):115	0:115,1:23	(0,0):1015,(0,1):219,(1,0):305	0:305,1:219	chr8	ENST00000433384.2	WHSC1L1	ALE	UTR3	hsa-miR-548d-3p,hsa-miR-198,ConservedRegion,PAS,K-BOX,hsa-miR-93,hsa-miR-548d-5p@ConservedRegion,BRD-BOX,PAS,UNR-bs	diff
chr8:62537094:62538839:-@chr8:62415820:62416068:-	0.81	0.65	0.94	0.4	0.35	0.45	0.41	4.8412e+07	(0,0):76,(0,1):3,(1,0):143	0:143,1:3	(0,0):732,(0,1):89,(1,0):554	0:554,1:89	chr8	ENST00000541428.1	ASPH	ALE	UTR3	ConservedRegion,AT_rich,BRD-BOX,PAS,K-BOX@NA	diff
chr1:98185324:98186482:-@chr1:97543300:97544702:-	0.91	0.82	0.97	0.51	0.38	0.64	0.4	5.72847e+07	(0,0):22,(0,1):2,(1,0):26	0:26,1:2	(0,0):166,(0,1):30,(1,0):26	0:26,1:30	chr1	ENST00000370192.3	DPYD	ALE	UTR3	ConservedRegion,PAS,(GA)n,(TG)n@ConservedRegion,AT_rich,PAS	diff
chr1:22054339:22055212:-@chr1:22004792:22005932:-	0.77	0.68	0.84	0.47	0.42	0.51	0.3	2.19551e+10	(0,0):287,(0,1):25,(1,0):64	0:64,1:25	(0,0):1838,(0,1):294,(1,0):194	0:194,1:294	chr1	ENST00000400301.1	USP48	ALE	UTR3	NA@SF2,hsa-miR-148b,ConservedRegion,PAS,hsa-miR-26a,hsa-miR-30e	diff
chr1:22054339:22055212:-@chr1:22047529:22047656:-	0.53	0.32	0.77	0.18	0.14	0.22	0.35	24.16	(0,0):124,(0,1):4,(1,0):64	0:64,1:4	(0,0):680,(0,1):62,(1,0):194	0:194,1:62	chr1	ENST00000400301.1	USP48	ALE	UTR3	NA@NA	diff
chr14:91844987:91846229:-@chr14:91737667:91739997:-	0.45	0.35	0.56	0.11	0.07	0.16	0.34	5.9453e+20	(0,0):182,(0,1):64,(1,0):28	0:28,1:64	(0,0):954,(0,1):285,(1,0):17	0:17,1:285	chr14	ENST00000389856.5	CCDC88C	ALE	UTR3	NA@ConservedRegion,PAS	diff
chr14:51389971:51390818:-@chr14:51371937:51372274:-	0.71	0.6	0.81	0.28	0.23	0.32	0.43	3.28294e+39	(0,0):211,(0,1):16,(1,0):119	0:119,1:16	(0,0):1860,(0,1):136,(1,0):151	0:151,1:136	chr14	ENST00000532462.1	PYGL	ALE	UTR3	SF2@ConservedRegion,PAS	diff
chr10:93221852:93222967:+@chr10:93272021:93274520:+	0.45	0.33	0.56	0.15	0.11	0.2	0.3	653473	(0,0):75,(0,1):65,(1,0):23	0:23,1:65	(0,0):607,(0,1):476,(1,0):36	0:36,1:476	chr10	ENST00000446394.1	HECTD2	ALE	UTR3	L1M5,AT_rich,uORF,MER5A,Tigger2a@ConservedRegion,PAS	diff
chr10:63997909:63999524:-@chr10:63952953:63958202:-	0.66	0.57	0.74	0.28	0.24	0.32	0.38	8.51175e+44	(0,0):81,(0,1):72,(1,0):43	0:43,1:72	(0,0):517,(0,1):829,(1,0):94	0:94,1:829	chr10	ENST00000373789.3	RTKN2	ALE	UTR3	ConservedRegion,Eulor1,PAS@ConservedRegion,AT_rich,(TTCC)n,PAS,CT-rich	diff
chr10:38343303:38348995:+@chr10:38353016:38354026:+	0.22	0.18	0.27	0.66	0.62	0.69	-0.44	1000000000000	(0,0):30,(0,1):101,(1,0):171	0:171,1:101	(0,0):81,(0,1):172,(1,0):1973	0:1973,1:172	chr10	ENST00000374618.3	ZNF33A	ALE	UTR3	L1MC2,ConservedRegion,BRD-BOX,PAS,AluSx3,K-BOX,L1MC,L1MD3,(TG)n@K-BOX	diff
chr10:38343306:38348995:+@chr10:38353016:38354026:+	0.22	0.18	0.27	0.66	0.62	0.69	-0.44	1000000000000	(0,0):28,(0,1):101,(1,0):171	0:171,1:101	(0,0):80,(0,1):172,(1,0):1972	0:1972,1:172	chr10	ENST00000374618.3	ZNF33A	ALE	UTR3	L1MC2,ConservedRegion,BRD-BOX,PAS,AluSx3,K-BOX,L1MC,L1MD3,(TG)n@K-BOX	diff
chr10:43084555:43090147:-@chr10:43077042:43078571:-	0.24	0.19	0.3	0.79	0.75	0.83	-0.55	5.01462e+303	(0,0):24,(0,1):68,(1,0):83	0:83,1:68	(0,0):39,(0,1):63,(1,0):920	0:920,1:63	chr10	ENST00000486187.1	ZNF33B	ALE	UTR3	L1MC2,Zaphod,ConservedRegion,BRD-BOX,PAS,K-BOX,L1MC3,AluSc8,L1MC4a,(TG)n@NA	diff
chr10:103789208:103789502:-@chr10:103605356:103607377:-	0.53	0.43	0.62	0.23	0.15	0.31	0.3	660.5	(0,0):208,(0,1):210,(1,0):28	0:28,1:210	(0,0):823,(0,1):636,(1,0):21	0:21,1:636	chr10	ENST00000311122.5	C10orf76	ALE	UTR3	PAS@ConservedRegion,PAS,AluSc8	diff
chr10:21845572:21846111:+@chr10:22030868:22032554:+,chr10:22029083:22029165:+	0.55	0.47	0.63	0.24	0.18	0.3	0.31	4.25743e+16	(0,0):317,(0,1):132,(1,0):46	0:46,1:132	(0,0):1290,(0,1):459,(1,0):40	0:40,1:459	chr10	ENST00000377072.3	MLLT10	ALE	UTR3	PAS,HAL1@ConservedRegion,AT_rich,PAS	diff
chr10:21845572:21846111:+@chr10:22030868:22032554:+	0.58	0.5	0.66	0.26	0.19	0.32	0.32	1085080980271750	(0,0):337,(0,1):112,(1,0):46	0:46,1:112	(0,0):1340,(0,1):409,(1,0):40	0:40,1:409	chr10	ENST00000377072.3	MLLT10	ALE	UTR3	PAS,HAL1@ConservedRegion,AT_rich,PAS	diff
chr10:21845572:21846111:+@chr10:21884260:21884369:+	0.55	0.33	0.78	0.16	0.09	0.25	0.39	75.86	(0,0):19,(0,1):3,(1,0):46	0:46,1:3	(0,0):99,(0,1):18,(1,0):40	0:40,1:18	chr10	ENST00000377072.3	MLLT10	ALE	UTR3	PAS,HAL1@NA	diff
chr15:85159540:85159841:+@chr15:85163833:85166947:+	0.68	0.6	0.76	0.36	0.25	0.48	0.32	45951.6	(0,0):29,(0,1):201,(1,0):34	0:34,1:201	(0,0):28,(0,1):342,(1,0):14	0:14,1:342	chr15	ENST00000546148.1	ZSCAN2	ALE	UTR3	NA@ConservedRegion,BRD-BOX,PAS,AluY,GY-BOX,MIR	diff
chr15:85159540:85159841:+@chr15:85163833:85165945:+	0.65	0.56	0.73	0.33	0.22	0.44	0.32	1133.08	(0,0):29,(0,1):158,(1,0):34	0:34,1:158	(0,0):36,(0,1):258,(1,0):14	0:14,1:258	chr15	ENST00000546148.1	ZSCAN2	ALE	UTR3	NA@ConservedRegion,BRD-BOX,GY-BOX,MIR	diff
chr15:56991558:56993270:-@chr15:56922374:56924320:-	0.84	0.74	0.92	0.51	0.45	0.58	0.33	1.36964e+17	(0,0):36,(0,1):11,(1,0):54	0:54,1:11	(0,0):266,(0,1):122,(1,0):113	0:113,1:122	chr15	ENST00000559237.1	ZNF280D	ALE	UTR3	NA@ConservedRegion,PAS,hsa-miR-9,UNR-bs	diff
chr9:137989627:137989952:+@chr9:138011350:138013030:+	0.54	0.39	0.69	0.23	0.09	0.39	0.31	11.61	(0,0):28,(0,1):64,(1,0):13	0:13,1:64	(0,0):42,(0,1):118,(1,0):5	0:5,1:118	chr9	ENST00000277415.11	OLFM1	ALE	UTR3	ConservedRegion,PAS@ConservedRegion,PAS	diff
chr9:94841346:94841848:-@chr9:94793427:94794840:-	0.39	0.29	0.49	0.08	0.05	0.12	0.31	2604610129438370	(0,0):201,(0,1):132,(1,0):27	0:27,1:132	(0,0):1140,(0,1):779,(1,0):22	0:22,1:779	chr9	ENST00000486910.1	SPTLC1	ALE	UTR3	PAS,AluSx1@hsa-miR-579,ConservedRegion,hsa-miR-15a,PAS,hsa-miR-16,hsa-miR-15b	diff
chr9:17166816:17168554:+@chr9:17502549:17503917:+	0.8	0.65	0.91	0.34	0.28	0.4	0.46	2.15746e+09	(0,0):141,(0,1):5,(1,0):30	0:30,1:5	(0,0):991,(0,1):130,(1,0):84	0:84,1:130	chr9	ENST00000380647.3	CNTLN	ALE	UTR3	NA@MER58B,ConservedRegion,BRD-BOX,PAS,L2a	diff
chr9:17166816:17168554:+@chr9:17502549:17503917:+,chr9:17494905:17495019:+	0.82	0.65	0.94	0.35	0.29	0.42	0.47	3.03696e+11	(0,0):141,(0,1):5,(1,0):30	0:30,1:5	(0,0):991,(0,1):130,(1,0):84	0:84,1:130	chr9	ENST00000380647.3	CNTLN	ALE	UTR3	NA@AluSg7,MER58B,ConservedRegion,BRD-BOX,PAS,L2a	diff
chr9:17298188:17302049:+@chr9:17502549:17503917:+	0.84	0.72	0.93	0.39	0.33	0.44	0.45	6.38588e+37	(0,0):17,(0,1):5,(1,0):84	0:84,1:5	(0,0):589,(0,1):130,(1,0):236	0:236,1:130	chr9	ENST00000380647.3	CNTLN	ALE	UTR3	NA@MER58B,ConservedRegion,BRD-BOX,PAS,L2a	diff
chr9:17298188:17302049:+@chr9:17502549:17503917:+,chr9:17494905:17495019:+	0.84	0.73	0.93	0.4	0.35	0.46	0.44	9.84619e+36	(0,0):17,(0,1):5,(1,0):84	0:84,1:5	(0,0):589,(0,1):130,(1,0):236	0:236,1:130	chr9	ENST00000380647.3	CNTLN	ALE	UTR3	NA@AluSg7,MER58B,ConservedRegion,BRD-BOX,PAS,L2a	diff
chr9:135785198:135786079:-@chr9:135766736:135772141:-	0.52	0.46	0.57	0.2	0.16	0.24	0.32	2.98259e+76	(0,0):207,(0,1):577,(1,0):94	0:94,1:577	(0,0):794,(0,1):2011,(1,0):76	0:76,1:2011	chr9	ENST00000298552.3	TSC1	ALE	UTR3	NA@hsa-miR-98,(T)n,ConservedRegion,BRD-BOX,hsa-miR-25,hsa-miR-32,PAS,CR1_Mam,hsa-let-7f,UNR-bs	diff
chr6:42025127:42025510:+@chr6:42045271:42048644:+	0.73	0.69	0.76	0.44	0.39	0.49	0.29	2.75877e+95	(0,0):466,(0,1):798,(1,0):200	0:200,1:798	(0,0):776,(0,1):1505,(1,0):111	0:111,1:1505	chr6	ENST00000372978.3	TAF8	ALE	UTR3	FLAM_C,PAS@AluSz,AluSq2,ConservedRegion,PAS,GY-BOX,AluSz6,L4	diff
chr6:42025127:42025510:+@chr6:42054457:42055199:+,chr6:42044838:42044977:+	0.92	0.89	0.94	0.79	0.74	0.84	0.13	5.3934e+06	(0,0):1320,(0,1):45,(1,0):200	0:200,1:45	(0,0):2482,(0,1):74,(1,0):111	0:111,1:74	chr6	ENST00000372978.3	TAF8	ALE	UTR3	FLAM_C,PAS@PAS,MIR	diff
chr6:32158543:32159280:-@chr6:31927245:31927982:-	0.97	0.94	0.99	0.84	0.78	0.89	0.13	9.60142e+06	(0,0):22354,(0,1):7,(1,0):221	0:221,1:7	(0,0):26912,(0,1):32,(1,0):169	0:169,1:32	chr6	ENST00000375040.3	GPSM3	ALE	UTR3	ConservedRegion,PAS@SF2	diff
chr6:31634598:31635607:+@chr6:31639641:31640227:+	0.23	0.19	0.28	0.11	0.08	0.15	0.12	2962.89	(0,0):7824,(0,1):130,(1,0):70	0:70,1:130	(0,0):6096,(0,1):164,(1,0):37	0:37,1:164	chr6	ENST00000375882.2	CSNK2B	ALE	UTR3	SF2,ConservedRegion,IRES@K-BOX	diff
chr6:94119373:94120888:-@chr6:93951139:93953258:-	0.7	0.63	0.75	0.49	0.47	0.52	0.21	3.43531e+18	(0,0):237,(0,1):68,(1,0):111	0:111,1:68	(0,0):2393,(0,1):923,(1,0):633	0:633,1:923	chr6	ENST00000369303.4	EPHA7	ALE	UTR3	ConservedRegion,PAS@hsa-miR-579,hsa-miR-103,K-BOX,hsa-miR-9,hsa-miR-93,hsa-miR-204,(CAAAA)n,hsa-miR-26b,hsa-miR-15b,hsa-miR-98,ConservedRegion,BRD-BOX,hsa-miR-106b,PAS,hsa-let-7f,hsa-miR-196b,hsa-miR-26a,hsa-miR-16,UNR-bs	diff
chr6:32793187:32796682:-@chr6:4034241:4037736:-	0.96	0.92	0.99	0.82	0.78	0.85	0.14	3.2347e+07	(0,0):369400,(0,1):3,(1,0):92	0:92,1:3	(0,0):717277,(0,1):68,(1,0):309	0:309,1:68	chr6	ENST00000374899.4	TAP2	ALE	UTR3	(GGGTG)n,ConservedRegion,AT_rich,BRD-BOX,PAS,AmnSINE2,L2,L1ME4a,GY-BOX,MIRb,UNR-bs,L2c@SF2,UNR-bs	diff
chr6:128642549:128643455:-@chr6:128289932:128291425:-	0.67	0.6	0.73	0.39	0.35	0.43	0.28	1.12165e+37	(0,0):376,(0,1):84,(1,0):101	0:101,1:84	(0,0):2346,(0,1):495,(1,0):184	0:184,1:495	chr6	ENST00000368226.4	PTPRK	ALE	UTR3	NA@hsa-miR-25,hsa-miR-218,ConservedRegion,AT_rich,hsa-miR-32,PAS	diff
chr6:135356995:135359164:-@chr6:135281521:135286428:-	0.28	0.22	0.34	0.49	0.45	0.53	-0.21	1.10836e+18	(0,0):1831,(0,1):283,(1,0):47	0:47,1:283	(0,0):3462,(0,1):506,(1,0):215	0:215,1:506	chr6	ENST00000367837.5	HBS1L	ALE	UTR3	ConservedRegion,AT_rich,PAS@K-BOX,MIRb,MER90,ConservedRegion,BRD-BOX,PAS,L1ME4a,AluJr,MLT1K,UNR-bs	diff
chr6:32793187:32796811:-@chr6:4034241:4037736:-	0.96	0.92	0.99	0.83	0.8	0.87	0.13	903588	(0,0):369400,(0,1):3,(1,0):109	0:109,1:3	(0,0):717273,(0,1):68,(1,0):357	0:357,1:68	chr6	ENST00000374899.4	TAP2	ALE	UTR3	(GGGTG)n,SF2,ConservedRegion,AT_rich,BRD-BOX,PAS,AmnSINE2,L2,L1ME4a,MIRb,GY-BOX,L2c,UNR-bs@UNR-bs	diff
chr6:3263918:3266965:+@chr6:3267825:3268300:+	0.08	0.07	0.1	0.19	0.16	0.23	-0.11	6.14579e+11	(0,0):353,(0,1):208,(1,0):137	0:137,1:208	(0,0):238,(0,1):117,(1,0):202	0:202,1:117	chr6	ENST00000454610.2	PSMG4	ALE	UTR3	SF2,PAS@SF2,ConservedRegion,PAS	diff
chr6:112574986:112575493:-@chr6:112429134:112430785:-	0.97	0.95	0.98	0.8	0.78	0.83	0.17	4.74703e+154	(0,0):613,(0,1):32,(1,0):259	0:259,1:32	(0,0):3840,(0,1):294,(1,0):333	0:333,1:294	chr6	ENST00000230538.7	LAMA4	ALE	UTR3	NA@ConservedRegion,PAS,AluJr	diff
chr6:42025127:42025510:+@chr6:42045271:42048644:+,chr6:42044838:42044977:+	0.72	0.68	0.74	0.43	0.38	0.48	0.29	2.11266e+103	(0,0):389,(0,1):875,(1,0):200	0:200,1:875	(0,0):660,(0,1):1621,(1,0):111	0:111,1:1621	chr6	ENST00000372978.3	TAF8	ALE	UTR3	FLAM_C,PAS@L4,AluSz,ConservedRegion,PAS,AluSq2,GY-BOX,AluSz6	diff
chr6:33054316:33054976:+,chr6:33053996:33054019:+@chr6:33248572:33249232:+,chr6:33248252:33248275:+	0.47	0.42	0.51	0.31	0.27	0.34	0.16	4.8355e+06	(0,0):34394,(0,1):229,(1,0):199	0:199,1:229	(0,0):35190,(0,1):374,(1,0):164	0:164,1:374	chr6	ENST00000418931	ENSG00000223865	ALE	UTR3	PAS@SF2	diff
chr6:151219996:151220157:+@chr6:151422662:151423023:+,chr6:151413603:151413723:+	0.45	0.3	0.6	0.17	0.1	0.24	0.28	16.85	(0,0):565,(0,1):55,(1,0):10	0:10,1:55	(0,0):3145,(0,1):340,(1,0):14	0:14,1:340	chr6	ENST00000367321.3	MTHFD1L	ALE	UTR3	PAS,AluSc@ConservedRegion,PAS	diff
chr6:33180075:33180499:+@chr6:33374068:33374492:+	0.84	0.81	0.87	0.58	0.54	0.62	0.26	4.47717e+129	(0,0):40340,(0,1):86,(1,0):466	0:466,1:86	(0,0):42292,(0,1):250,(1,0):340	0:340,1:250	chr6	ENST00000374656.4	RING1	ALE	UTR3	ConservedRegion,PAS@SF2	diff
chr6:31654736:31655072:-@chr6:3155863:3156199:-	0.75	0.69	0.81	0.53	0.47	0.59	0.22	108536	(0,0):306568,(0,1):38,(1,0):118	0:118,1:38	(0,0):538344,(0,1):132,(1,0):148	0:148,1:132	chr6	ENST00000395952.3	ABHD16A	ALE	UTR3	ConservedRegion,PAS@SF2	diff
chr13:107209396:107212005:-@chr13:107195662:107196508:-	0.22	0.18	0.25	0.33	0.3	0.35	-0.11	2729.88	(0,0):124,(0,1):181,(1,0):162	0:162,1:181	(0,0):336,(0,1):417,(1,0):658	0:658,1:417	chr13	ENST00000400198.3	ARGLU1	ALE	UTR3	SF2,ConservedRegion,BRD-BOX,SF2SAN_636@(TTTTTG)n,K-BOX,SF2,ConservedRegion,AT_rich,PAS,A-rich,UNR-bs	diff
chr12:53936674:53937232:-@chr12:53909843:53911138:-	0.69	0.63	0.75	0.44	0.38	0.51	0.25	1.39487e+08	(0,0):219,(0,1):103,(1,0):91	0:91,1:103	(0,0):393,(0,1):244,(1,0):77	0:77,1:244	chr12	ENST00000548446.2	ATF7	ALE	UTR3	ConservedRegion,AT_rich,PAS@BRD-BOX,ConservedRegion,uORF	diff
chr12:70188921:70190424:+@chr12:70209144:70216984:+	0.5	0.42	0.58	0.3	0.25	0.34	0.2	86543.1	(0,0):186,(0,1):239,(1,0):45	0:45,1:239	(0,0):418,(0,1):1113,(1,0):87	0:87,1:1113	chr12	ENST00000247833.7	RAB3IP	ALE	UTR3	NA@L1MA5A,L1M5,L1ME3F,L2,MER102a,FLAM_A,ConservedRegion,BRD-BOX,FAM,PAS,Charlie15a,AluJr,AluJo,AluSp,GY-BOX,L1MA4,(CA)n,UNR-bs	diff
chr12:70188921:70190424:+@chr12:70209144:70216984:+,chr12:70206744:70206813:+	0.48	0.4	0.55	0.29	0.25	0.33	0.19	1027.01	(0,0):156,(0,1):269,(1,0):45	0:45,1:269	(0,0):360,(0,1):1171,(1,0):87	0:87,1:1171	chr12	ENST00000247833.7	RAB3IP	ALE	UTR3	NA@L1MA5A,L1M5,L1ME3F,L2,MER102a,FLAM_A,ConservedRegion,BRD-BOX,FAM,PAS,Charlie15a,AluJr,AluJo,AluSp,GY-BOX,L1MA4,(CA)n,UNR-bs	diff
chr12:56478779:56479401:+@chr12:56495313:56497128:+	0.72	0.6	0.82	0.45	0.3	0.59	0.27	21.08	(0,0):54,(0,1):24,(1,0):21	0:21,1:24	(0,0):174,(0,1):53,(1,0):14	0:14,1:53	chr12	ENST00000267101.3	ERBB3	ALE	UTR3	AT_rich,PAS,AluSz@hsa-miR-125a-5p,hsa-miR-125b,MIRb,ConservedRegion,hsa-miR-152,AluJr	diff
chr12:31604636:31605410:-@chr12:31535157:31540720:-	0.77	0.71	0.81	0.51	0.48	0.55	0.26	9.15515e+40	(0,0):172,(0,1):165,(1,0):71	0:71,1:165	(0,0):1053,(0,1):1496,(1,0):203	0:203,1:1496	chr12	ENST00000536562.1	DENND5B	ALE	UTR3	PAS,GY-BOX@AluY,K-BOX,FLAM_A,MARNA,ConservedRegion,AT_rich,BRD-BOX,PAS,AluSq2,MIR3,UNR-bs	diff
chr12:31604636:31605410:-@chr12:31537719:31539234:-	0.77	0.71	0.84	0.53	0.49	0.57	0.24	3.07049e+26	(0,0):215,(0,1):41,(1,0):71	0:71,1:41	(0,0):1490,(0,1):372,(1,0):203	0:203,1:372	chr12	ENST00000536562.1	DENND5B	ALE	UTR3	PAS,GY-BOX@AluY,AluSq2,MIR3,UNR-bs	diff
chr12:42792656:42793227:+@chr12:42840394:42842422:+	0.63	0.54	0.72	0.42	0.37	0.47	0.21	98.1	(0,0):309,(0,1):95,(1,0):42	0:42,1:95	(0,0):950,(0,1):615,(1,0):115	0:115,1:615	chr12	ENST00000395580.3	PPHLN1	ALE	UTR3	ConservedRegion,PAS,L1ME4a@K-BOX,LTR22E,ConservedRegion,AT_rich,BRD-BOX,PAS,HERVK22-intLTR/ERVK,UNR-bs	diff
chr12:98926601:98928321:+@chr12:98941351:98942735:+	0.27	0.24	0.29	0.42	0.41	0.43	-0.15	1.87278e+183	(0,0):1038,(0,1):962,(1,0):436	0:436,1:962	(0,0):3530,(0,1):2641,(1,0):2415	0:2415,1:2641	chr12	ENST00000556029.1	TMPO	ALE	UTR3	SF2,ConservedRegion,IRES@AluYc,AluSc5,ConservedRegion,PAS,hsa-miR-23b,UNR-bs	diff
chr12:109927724:109928410:+@chr12:109972396:109974507:+	0.27	0.22	0.33	0.11	0.08	0.15	0.16	6.58683e+06	(0,0):750,(0,1):487,(1,0):54	0:54,1:487	(0,0):1358,(0,1):910,(1,0):35	0:35,1:910	chr12	ENST00000434735.2	UBE3B	ALE	UTR3	K-BOX,MIRc@ConservedRegion,PAS,GY-BOX	diff
chr21:34896317:34897307:-@chr21:34876272:34876622:-	0.58	0.51	0.65	0.4	0.37	0.43	0.18	1.46317e+08	(0,0):544,(0,1):54,(1,0):249	0:249,1:54	(0,0):3645,(0,1):359,(1,0):805	0:805,1:359	chr21	ENST00000381815.4	GART	ALE	UTR3	T-rich,ConservedRegion,PAS,GY-BOX,AluJb@ConservedRegion,PAS	diff
chr21:34634866:34635062:+@chr21:34635098:34636820:+	0.74	0.67	0.8	0.57	0.49	0.64	0.17	17.4	(0,0):23,(0,1):157,(1,0):35	0:35,1:157	(0,0):51,(0,1):391,(1,0):39	0:39,1:391	chr21	ENST00000382264.3	IFNAR2	ALE	UTR3	PAS@K-BOX,AluSx1,ConservedRegion,PAS	diff
chr21:40668365:40670508:-@chr21:40557404:40559343:-	0.98	0.96	0.99	0.74	0.72	0.77	0.24	1000000000000	(0,0):291,(0,1):13,(1,0):647	0:647,1:13	(0,0):4687,(0,1):254,(1,0):822	0:822,1:254	chr21	ENST00000333229.2	BRWD1	ALE	UTR3	NA@ConservedRegion,PAS	diff
chr21:45479346:45480108:+@chr21:45523174:45526432:+	0.32	0.27	0.37	0.16	0.13	0.2	0.16	5.2865e+08	(0,0):1246,(0,1):638,(1,0):65	0:65,1:638	(0,0):3148,(0,1):1656,(1,0):69	0:69,1:1656	chr21	ENST00000291574.4	TRAPPC10	ALE	UTR3	PAS@hsa-miR-448,K-BOX,SF2,ConservedRegion,PAS	diff
chrX:85224656:85226590:-@chrX:85116185:85119826:-	0.46	0.36	0.56	0.24	0.2	0.28	0.22	480.61	(0,0):58,(0,1):72,(1,0):32	0:32,1:72	(0,0):440,(0,1):556,(1,0):90	0:90,1:556	chrX	ENST00000357749.2	CHM	ALE	UTR3	ConservedRegion,L1MA6,AT_rich,K-BOX,LTR12C,MIRb@MIRc,AluSx1,ConservedRegion,PAS	diff
chrX:76937012:76940085:-@chrX:76760356:76764107:-	0.35	0.22	0.49	0.62	0.6	0.64	-0.27	6755.85	(0,0):40,(0,1):44,(1,0):19	0:19,1:44	(0,0):1824,(0,1):978,(1,0):1313	0:1313,1:978	chrX	ENST00000373344.4	ATRX	ALE	UTR3	SF2@(A)n,K-BOX,MARNA,ConservedRegion,BRD-BOX,PAS	diff
chr20:61536355:61537452:-@chr20:61509090:61513766:-	0.89	0.86	0.91	0.66	0.63	0.69	0.23	1.84146e+217	(0,0):279,(0,1):144,(1,0):250	0:250,1:144	(0,0):1219,(0,1):954,(1,0):412	0:412,1:954	chr20	ENST00000395343.1	DIDO1	ALE	UTR3	PAS@SF2,ConservedRegion,PAS,SF2SAN_924,UNR-bs	diff
chr7:45703888:45704270:+@chr7:45753292:45762714:+	0.47	0.35	0.58	0.25	0.18	0.33	0.22	27.37	(0,0):190,(0,1):628,(1,0):19	0:19,1:628	(0,0):512,(0,1):1731,(1,0):19	0:19,1:1731	chr7	ENST00000297323.7	ADCY1	ALE	UTR3	PAS,L1ME4a@MLT1E2,K-BOX,MIRb,AluSx1,ConservedRegion,PAS	diff
chr7:101891692:101893344:+@chr7:101926313:101927250:+	0.1	0.07	0.13	0.31	0.26	0.35	-0.21	1.0103e+42	(0,0):923,(0,1):172,(1,0):32	0:32,1:172	(0,0):4204,(0,1):191,(1,0):153	0:153,1:191	chr7	ENST00000437600.3	CUX1	ALE	UTR3	BRD-BOX,ConservedRegion,PAS,UNR-bs@ConservedRegion,PAS	diff
chr7:69755354:69755607:+@chr7:70254734:70257885:+	0.25	0.14	0.36	0.05	0.02	0.1	0.2	23.68	(0,0):590,(0,1):522,(1,0):10	0:10,1:522	(0,0):1695,(0,1):1534,(1,0):4	0:4,1:1534	chr7	ENST00000406775.2	AUTS2	ALE	UTR3	NA@(A)n,(TG)n,SF2,(T)n,ConservedRegion,AT_rich,BRD-BOX,PAS,(CCA)n,GY-BOX	diff
chr7:63984955:63986895:-@chr7:63980262:63982878:-	0.18	0.1	0.28	0.04	0.02	0.06	0.14	12.9	(0,1):49,(1,0):7	0:7,1:49	(0,0):19,(0,1):507,(1,0):15	0:15,1:507	chr7	ENST00000309683.6	ZNF680	ALE	UTR3	ConservedRegion,BRD-BOX,L1M3d,L1MB2@K-BOX,SF2,ConservedRegion,AT_rich,PAS	diff
chr7:107258773:107260923:+@chr7:107269267:107271165:+	0.57	0.49	0.64	0.82	0.79	0.85	-0.25	2.78849e+18	(0,0):71,(0,1):66,(1,0):98	0:98,1:66	(0,0):356,(0,1):113,(1,0):598	0:598,1:113	chr7	ENST00000005259.4	BCAP29	ALE	UTR3	hsa-miR-98,ConservedRegion,BRD-BOX,PAS,hsa-let-7g,hsa-let-7f,MIR3,MIRb,MIR@hsa-let-7g,ConservedRegion,PAS	diff
chr7:107262075:107263762:+@chr7:107269267:107271165:+	0.31	0.22	0.4	0.58	0.52	0.64	-0.27	728.26	(0,0):6,(0,1):66,(1,0):25	0:25,1:66	(0,0):46,(0,1):113,(1,0):138	0:138,1:113	chr7	ENST00000005259.4	BCAP29	ALE	UTR3	MER20,PAS,MLT1J,L2a,GY-BOX@hsa-let-7g,ConservedRegion,PAS	diff
chr7:23165380:23165662:+@chr7:23213634:23215038:+	0.73	0.67	0.78	0.46	0.39	0.52	0.27	1.60546e+18	(0,0):331,(0,1):156,(1,0):68	0:68,1:156	(0,0):941,(0,1):445,(1,0):59	0:59,1:445	chr7	ENST00000322231.7	KLHL7	ALE	UTR3	Tigger7,PAS@ConservedRegion,AT_rich,PAS	diff
chr7:138745084:138745884:-@chr7:138728266:138732599:-	0.45	0.31	0.57	0.16	0.13	0.2	0.29	204963	(0,0):22,(0,1):105,(1,0):15	0:15,1:105	(0,0):322,(0,1):1720,(1,0):55	0:55,1:1720	chr7	ENST00000242351.5	ZC3HAV1	ALE	UTR3	FLAM_C,PAS@(A)n,AluSx3,MER20B,MER5B,ConservedRegion,PAS,L2b,UNR-bs	diff
chr7:120595613:120597031:+@chr7:120614782:120615711:+	0.48	0.39	0.57	0.31	0.26	0.35	0.17	41.39	(0,0):165,(0,1):53,(1,0):76	0:76,1:53	(0,0):628,(0,1):196,(1,0):135	0:135,1:196	chr7	ENST00000315870.5	ING3	ALE	UTR3	ConservedRegion,PAS@K-BOX,ConservedRegion,PAS	diff
chr7:120595613:120597031:+@chr7:120610742:120615711:+	0.77	0.71	0.82	0.63	0.58	0.68	0.14	1536.23	(0,0):138,(0,1):80,(1,0):76	0:76,1:80	(0,0):540,(0,1):284,(1,0):135	0:135,1:284	chr7	ENST00000315870.5	ING3	ALE	UTR3	ConservedRegion,PAS@K-BOX,ConservedRegion,PAS	diff
chr7:120596214:120597034:+@chr7:120614782:120615711:+	0.61	0.53	0.69	0.42	0.37	0.48	0.19	117.11	(0,0):145,(0,1):53,(1,0):73	0:73,1:53	(0,0):596,(0,1):196,(1,0):125	0:125,1:196	chr7	ENST00000315870.5	ING3	ALE	UTR3	ConservedRegion,PAS@K-BOX,ConservedRegion,PAS	diff
chr7:120596214:120597034:+@chr7:120610742:120615711:+	0.85	0.81	0.89	0.74	0.7	0.78	0.11	21.84	(0,0):118,(0,1):80,(1,0):73	0:73,1:80	(0,0):508,(0,1):284,(1,0):125	0:125,1:284	chr7	ENST00000315870.5	ING3	ALE	UTR3	ConservedRegion,PAS@K-BOX,ConservedRegion,PAS	diff
chr7:86988522:86989369:+@chr7:87027840:87029109:+	0.41	0.28	0.54	0.14	0.1	0.18	0.27	430.3	(0,0):80,(0,1):38,(1,0):17	0:17,1:38	(0,0):659,(0,1):311,(1,0):31	0:31,1:311	chr7	ENST00000419147.2	CROT	ALE	UTR3	NA@K-BOX,hsa-miR-93,ConservedRegion,PAS,hsa-miR-33a,AluJb	diff
chr7:99621777:99622582:+@chr7:99630928:99635403:+	0.33	0.24	0.42	0.17	0.13	0.2	0.16	48.94	(0,0):80,(0,1):292,(1,0):24	0:24,1:292	(0,0):419,(0,1):1829,(1,0):60	0:60,1:1829	chr7	ENST00000324306.6	ZKSCAN1	ALE	UTR3	AT_rich,PAS,AluSz,K-BOX,AluJr@hsa-miR-15a,AluYc,hsa-miR-9,K-BOX,hsa-miR-93,hsa-miR-15b,AluSx1,SF2,ConservedRegion,hsa-miR-16,UNR-bs	diff
chr7:44873213:44874161:-@chr7:44866488:44869762:-	0.71	0.69	0.72	0.57	0.55	0.58	0.14	1.92081e+301	(0,0):2366,(0,1):2337,(1,0):1547	0:1547,1:2337	(0,0):4178,(0,1):4895,(1,0):1755	0:1755,1:4895	chr7	ENST00000222690.6	H2AFV	ALE	UTR3	SF2,ConservedRegion,AluYc,MER104,PAS,L2b,MIRb@MIRb,ConservedRegion,AT_rich,AluSq2,MLT1D,GY-BOX	diff
chr7:99498787:99499797:-@chr7:99488036:99490369:-	0.1	0.06	0.14	0.33	0.29	0.37	-0.23	4.27797e+28	(0,0):42,(0,1):367,(1,0):16	0:16,1:367	(0,0):169,(0,1):726,(1,0):146	0:146,1:726	chr7	ENST00000355947.2	TRIM4	ALE	UTR3	L1MEc@MIRb,MLT1L,PAS,L1PA15,L1ME4a	diff
chr11:33162977:33163308:-@chr11:33106130:33106835:-	0.87	0.82	0.91	0.61	0.56	0.66	0.26	1.29547e+34	(0,0):155,(0,1):35,(1,0):96	0:96,1:35	(0,0):1054,(0,1):233,(1,0):151	0:151,1:233	chr11	ENST00000323959.4	CSTF3	ALE	UTR3	ConservedRegion,PAS@ConservedRegion,PAS	diff
chr11:33162977:33163532:-@chr11:33106130:33106835:-	0.83	0.78	0.88	0.54	0.5	0.59	0.29	3.01556e+49	(0,0):228,(0,1):35,(1,0):139	0:139,1:35	(0,0):1169,(0,1):233,(1,0):212	0:212,1:233	chr11	ENST00000323959.4	CSTF3	ALE	UTR3	SF2,ConservedRegion,PAS,HAL1@ConservedRegion,PAS	diff
chr11:88053981:88059611:-@chr11:88026760:88027676:-	0.22	0.17	0.29	0.05	0.04	0.06	0.17	2.21438e+16	(0,0):59,(0,1):47,(1,0):86	0:86,1:47	(0,0):363,(0,1):308,(1,0):113	0:113,1:308	chr11	ENST00000227266.4	CTSC	ALE	UTR3	ConservedRegion,L1P3,PAS,L2a,MER85,L1PA10,MIRb@AT_rich,PAS	diff
chr11:88053981:88059567:-@chr11:88026760:88027676:-	0.2	0.15	0.26	0.05	0.04	0.06	0.15	1.41799e+16	(0,0):65,(0,1):47,(1,0):74	0:74,1:47	(0,0):368,(0,1):308,(1,0):104	0:104,1:308	chr11	ENST00000227266.4	CTSC	ALE	UTR3	L1P3,PAS,L2a,MER85,L1PA10,MIRb@AT_rich,PAS	diff
chr11:47861053:47862140:-@chr11:47799670:47800746:-	0.48	0.39	0.57	0.3	0.26	0.33	0.18	80.95	(0,0):342,(0,1):64,(1,0):59	0:59,1:64	(0,0):3129,(0,1):487,(1,0):208	0:208,1:487	chr11	ENST00000378460.2	NUP160	ALE	UTR3	ConservedRegion,IRES,PAS,K-BOX,L3@hsa-miR-577,ConservedRegion	diff
chr11:115085211:115085500:-@chr11:115044345:115047312:-	0.65	0.58	0.71	0.51	0.47	0.54	0.14	39.23	(0,0):127,(0,1):374,(1,0):53	0:53,1:374	(0,0):708,(0,1):2743,(1,0):211	0:211,1:2743	chr11	ENST00000537140.1	CADM1	ALE	UTR3	NA@K-BOX,ConservedRegion,AT_rich,(CAAAAA)n,PAS,UNR-bs	diff
chr11:76164358:76164969:+@chr11:76255303:76255912:+	0.33	0.21	0.47	0.08	0.04	0.13	0.25	7449.18	(0,0):138,(0,1):29,(1,0):14	0:14,1:29	(0,0):745,(0,1):116,(1,0):9	0:9,1:116	chr11	ENST00000427574.2	C11orf30	ALE	UTR3	NA@ConservedRegion	diff
chr16:31765087:31766243:+@chr16:31770678:31772885:+	0.35	0.22	0.49	0.64	0.57	0.71	-0.29	890.67	(0,0):47,(0,1):46,(1,0):13	0:13,1:46	(0,0):404,(0,1):100,(1,0):91	0:91,1:100	chr16	ENST00000316491.9	ZNF720	ALE	UTR3	NA@NA	diff
chr16:3336023:3336888:+,chr16:3335681:3335754:+@chr16:3349106:3351400:+	0.58	0.5	0.66	0.33	0.27	0.39	0.25	704.51	(0,0):1164,(0,1):99,(1,0):54	0:54,1:99	(0,0):1298,(0,1):305,(1,0):58	0:58,1:305	chr16	ENST00000538765.1	ZNF263	ALE	UTR3	SF2,ConservedRegion,PAS,L1ME2z@NA	diff
chr16:3339393:3341459:+@chr16:3349106:3351400:+	0.92	0.9	0.93	0.8	0.78	0.82	0.12	1.36047e+74	(0,0):81,(0,1):99,(1,0):980	0:980,1:99	(0,0):105,(0,1):305,(1,0):1084	0:1084,1:305	chr16	ENST00000538765.1	ZNF263	ALE	UTR3	ConservedRegion,PAS,UNR-bs@NA	diff
chr16:90025422:90025774:+@chr16:90032269:90034467:+	0.82	0.8	0.83	0.68	0.66	0.71	0.14	1.12091e+76	(0,0):706,(0,1):1060,(1,0):619	0:619,1:1060	(0,0):816,(0,1):1328,(1,0):378	0:378,1:1328	chr16	ENST00000563594.1	DEF8	ALE	UTR3	ConservedRegion,uORF,IRES@IRES,MIR,ConservedRegion,uORF	diff
chr16:89353070:89355078:-@chr16:89343886:89346124:-	0.96	0.94	0.98	0.71	0.69	0.74	0.25	9.96389e+300	(0,0):290,(0,1):18,(1,0):424	0:424,1:18	(0,0):4135,(0,1):289,(1,0):650	0:650,1:289	chr16	ENST00000378330.2	ANKRD11	ALE	UTR3	NA@NA	diff
chr16:89353070:89353521:-@chr16:89343886:89346124:-	0.96	0.93	0.98	0.7	0.65	0.74	0.26	9.34296e+97	(0,0):290,(0,1):18,(1,0):76	0:76,1:18	(0,0):4054,(0,1):289,(1,0):119	0:119,1:289	chr16	ENST00000378330.2	ANKRD11	ALE	UTR3	NA@NA	diff
chr16:89365283:89367370:-@chr16:89343886:89346124:-	0.95	0.93	0.97	0.68	0.65	0.71	0.27	3.51847e+225	(0,0):919,(0,1):18,(1,0):351	0:351,1:18	(0,0):5446,(0,1):289,(1,0):565	0:565,1:289	chr16	ENST00000378330.2	ANKRD11	ALE	UTR3	PAS@NA	diff
chr16:66599789:66599971:+@chr16:66599986:66600154:+	0.98	0.94	1	0.81	0.72	0.9	0.17	44.76	(0,0):115,(1,0):71	0.0493056	(0,0):104,(0,1):10,(1,0):52	0:52,1:10	chr16	ENST00000264001.4	CKLF	ALE	UTR3	PAS@NA	diff
chr16:1365655:1367126:+@chr16:1370439:1371422:+	0.29	0.19	0.41	0.52	0.42	0.63	-0.23	8.4	(0,0):2055,(0,1):30,(1,0):18	0:18,1:30	(0,0):1683,(0,1):31,(1,0):50	0:50,1:31	chr16	ENST00000397514.3	UBE2I	ALE	UTR3	NA@NA	diff
chr16:4411691:4412161:-@chr16:4390252:4390406:-	0.02	0.01	0.04	0.18	0.14	0.24	-0.16	1.3508e+25	(0,0):1473,(0,1):112,(1,0):11	0:11,1:112	(0,0):2075,(0,1):69,(1,0):73	0:73,1:69	chr16	ENST00000251166.4	CORO7	ALE	UTR3	ConservedRegion,K-BOX,MIRb,MIR@ConservedRegion,PAS	diff
chr5:68399789:68400567:+@chr5:68419026:68419360:+	0.44	0.36	0.52	0.27	0.22	0.32	0.17	26.45	(0,0):688,(0,1):48,(1,0):101	0:101,1:48	(0,0):1667,(0,1):123,(1,0):119	0:119,1:123	chr5	ENST00000396591.3	SLC30A5	ALE	UTR3	ConservedRegion,PAS,AluSx1@PAS	diff
chr5:80382947:80384383:+@chr5:80521497:80521953:+	0.62	0.47	0.78	0.37	0.28	0.45	0.25	7.88	(0,0):131,(0,1):9,(1,0):53	0:53,1:9	(0,0):455,(0,1):43,(1,0):86	0:86,1:43	chr5	ENST00000265080.4	RASGRF2	ALE	UTR3	NA@ConservedRegion	diff
chr5:137541563:137542373:-@chr5:137523337:137524837:-	0.39	0.34	0.44	0.17	0.15	0.19	0.22	7.84962e+39	(0,0):362,(0,1):346,(1,0):115	0:115,1:346	(0,0):1870,(0,1):1555,(1,0):166	0:166,1:1555	chr5	ENST00000394886.2	CDC23	ALE	UTR3	NA@ConservedRegion,PAS	diff
chr5:68399789:68400567:+@chr5:68425274:68425880:+	0.32	0.27	0.37	0.16	0.14	0.19	0.16	3.12635e+08	(0,0):792,(0,1):164,(1,0):101	0:101,1:164	(0,0):1943,(0,1):462,(1,0):119	0:119,1:462	chr5	ENST00000396591.3	SLC30A5	ALE	UTR3	ConservedRegion,PAS,AluSx1@ConservedRegion,PAS	diff
chr5:446652:448241:+@chr5:69337351:69338940:+	0.25	0.2	0.29	0.4	0.36	0.44	-0.15	1.11705e+07	(0,0):160148,(0,1):310,(1,0):100	0:100,1:310	(0,0):423065,(0,1):317,(1,0):214	0:214,1:317	chr5	ENST00000512944.1	EXOC3	ALE	UTR3	NA@AluSx3,AluSc,ConservedRegion,MLT1C,AluJb	diff
chr5:446652:448241:+@chr5:70212768:70214357:+	0.26	0.21	0.31	0.44	0.4	0.49	-0.18	3.1903e+13	(0,0):164568,(0,1):289,(1,0):100	0:100,1:289	(0,0):432451,(0,1):265,(1,0):214	0:214,1:265	chr5	ENST00000512944.1	EXOC3	ALE	UTR3	NA@AluSx3,AluSc,ConservedRegion,MLT1C,AluJb	diff
chr4:129960348:129961367:-@chr4:129805152:129805694:-	0.82	0.67	0.94	0.53	0.41	0.65	0.29	16.29	(0,0):99,(0,1):4,(1,0):37	0:37,1:4	(0,0):419,(0,1):26,(1,0):56	0:56,1:26	chr4	ENST00000281142.5	SCLT1	ALE	UTR3	ConservedRegion,PAS,(TG)n@ConservedRegion,PAS	diff
chr4:186433267:186435491:-@chr4:186422851:186423637:-	0.07	0.06	0.09	0.18	0.15	0.2	-0.11	9.43409e+40	(0,0):408,(0,1):352,(1,0):79	0:79,1:352	(0,0):766,(0,1):329,(1,0):210	0:210,1:329	chr4	ENST00000284770.4	PDLIM3	ALE	UTR3	ConservedRegion,UNR-bs@ConservedRegion,PAS,(CACG)n	diff
chr4:30732375:30732838:+@chr4:31144095:31148421:+	0.91	0.86	0.94	0.77	0.73	0.8	0.14	1.23803e+11	(0,0):91,(0,1):42,(1,0):39	0:39,1:42	(0,0):624,(0,1):520,(1,0):159	0:159,1:520	chr4	ENST00000361762.2	PCDH7	ALE	UTR3	ConservedRegion,PAS,K-BOX@(A)n,(TAAA)n,ConservedRegion,AT_rich,BRD-BOX,PAS,UNR-bs	diff
chr4:122782116:122782834:-@chr4:122745635:122747148:-	0.65	0.5	0.78	0.39	0.33	0.45	0.26	56.64	(0,0):108,(0,1):21,(1,0):19	0:19,1:21	(0,0):900,(0,1):264,(1,0):74	0:74,1:264	chr4	ENST00000264499.4	BBS7	ALE	UTR3	PAS@MIRc,ConservedRegion,AT_rich,BRD-BOX,PAS	diff
chr4:129782859:129785787:+@chr4:129792510:129796379:+	0.59	0.53	0.64	0.39	0.36	0.42	0.2	2.51148e+10	(0,0):43,(0,1):142,(1,0):153	0:153,1:142	(0,0):151,(0,1):669,(1,0):320	0:320,1:669	chr4	ENST00000511647.1	PHF17	ALE	UTR3	SF2,ConservedRegion,hsa-miR-578,PAS,AluSz,K-BOX,GY-BOX,(TG)n@hsa-miR-579,(A)n,hsa-miR-218,BRD-BOX,ConservedRegion,PAS,hsa-miR-7,hsa-miR-153,A-rich,GY-BOX	diff
chr4:187627717:187630999:-@chr4:187508937:187510374:-	0.21	0.16	0.26	0.41	0.39	0.44	-0.2	5.76129e+22	(0,0):370,(0,1):87,(1,0):53	0:53,1:87	(0,0):4704,(0,1):619,(1,0):1021	0:1021,1:619	chr4	ENST00000509647.1	FAT1	ALE	UTR3	IRES@hsa-miR-641,hsa-miR-548d-3p,hsa-miR-198,ConservedRegion,BRD-BOX,PAS	diff
chr2:128522042:128522553:-@chr2:128461808:128464126:-	0.87	0.84	0.89	0.64	0.61	0.68	0.23	1.22196e+97	(0,0):470,(0,1):132,(1,0):169	0:169,1:132	(0,0):2567,(0,1):610,(1,0):216	0:216,1:610	chr2	ENST00000322313.4	WDR33	ALE	UTR3	ConservedRegion,PAS@hsa-miR-198,ConservedRegion,PAS,AluJb	diff
chr2:60684329:60689559:-@chr2:60678302:60679801:-	0.43	0.36	0.5	0.7	0.65	0.75	-0.27	1.54417e+18	(0,0):29,(0,1):62,(1,0):167	0:167,1:62	(0,0):64,(0,1):77,(1,0):649	0:649,1:77	chr2	ENST00000356842.4	BCL11A	ALE	UTR3	(A)n,hsa-miR-25,(CAAA)n,hsa-miR-93,hsa-miR-626,(GA)n,hsa-miR-190,ConservedRegion,hsa-miR-561,hsa-miR-32,hsa-miR-21,hsa-miR-152,hsa-miR-23b,hsa-miR-26a,hsa-miR-452,hsa-miR-448,hsa-miR-148b,hsa-miR-657,hsa-miR-511,K-BOX,hsa-miR-33b,hsa-miR-613,GA-rich,hsa-miR-26b,hsa-miR-548c-3p,hsa-miR-577,hsa-miR-569,(T)n,hsa-miR-586,AT_rich,PAS,hsa-miR-33a,hsa-miR-484,(TTTTTA)n,hsa-miR-567,hsa-miR-553,hsa-miR-64…	diff
chr2:211016129:211019335:-@chr2:210885435:210887903:-	0.15	0.11	0.19	0.27	0.24	0.3	-0.12	177793	(0,0):88,(0,1):218,(1,0):48	0:48,1:218	(0,0):604,(0,1):521,(1,0):255	0:255,1:521	chr2	ENST00000418791.1	KANSL1L	ALE	UTR3	ConservedRegion@(CATA)n,MIRc,SF2,ConservedRegion,(TTG)n,PAS,UNR-bs	diff
chr2:71622377:71622796:+@chr2:71653590:71654544:+	0.41	0.2	0.61	0.13	0.1	0.16	0.28	6.23	(0,0):80,(0,1):25,(1,0):7	0:7,1:25	(0,0):2212,(0,1):801,(1,0):45	0:45,1:801	chr2	ENST00000410075.1	ZNF638	ALE	UTR3	NA@SF2,ConservedRegion	diff
chr2:145268958:145271364:-@chr2:145145584:145146449:-	0.23	0.14	0.34	0.09	0.06	0.12	0.14	13.01	(0,0):275,(0,1):22,(1,0):18	0:18,1:22	(0,0):1341,(0,1):147,(1,0):39	0:39,1:147	chr2	ENST00000303660.3	ZEB2	ALE	UTR3	NA@ConservedRegion,AT_rich,PAS,UNR-bs	diff
chr2:65298588:65301312:+@chr2:65310773:65314142:+,chr2:65309670:65309843:+	0.73	0.69	0.76	0.59	0.56	0.62	0.14	8428951950349290	(0,0):143,(0,1):176,(1,0):364	0:364,1:176	(0,0):244,(0,1):565,(1,0):629	0:629,1:565	chr2	ENST00000377990.2	CEP68	ALE	UTR3	MER103C,MIRc,MIR,SF2@AluY,K-BOX,ConservedRegion,BRD-BOX,PAS,hsa-miR-101,UNR-bs	diff
chr2:202624183:202626541:-@chr2:202565277:202566612:-	0.62	0.56	0.67	0.5	0.47	0.54	0.12	46.86	(0,0):390,(0,1):99,(1,0):287	0:287,1:99	(0,0):1704,(0,1):348,(1,0):638	0:638,1:348	chr2	ENST00000264276.6	ALS2	ALE	UTR3	ConservedRegion,AT_rich,PAS,AluJb@ConservedRegion,PAS,GY-BOX,UNR-bs	diff
chr2:233422594:233423533:+@chr2:233445614:233448349:+	0.38	0.34	0.42	0.22	0.19	0.26	0.16	1.84938e+10	(0,0):2652,(0,1):836,(1,0):164	0:164,1:836	(0,0):2165,(0,1):1068,(1,0):100	0:100,1:1068	chr2	ENST00000409098.1	EIF4E2	ALE	UTR3	ConservedRegion@(TG)n,ConservedRegion,(TTG)n,PAS	diff
chr2:75928924:75929549:-@chr2:75889294:75891909:-	0.81	0.75	0.85	0.55	0.5	0.59	0.26	5.94873e+23	(0,0):286,(0,1):78,(1,0):72	0:72,1:78	(0,0):2152,(0,1):584,(1,0):155	0:155,1:584	chr2	ENST00000321027.3	GCFC2	ALE	UTR3	ConservedRegion,SF2,PAS@L1M5,ConservedRegion,BRD-BOX,PAS,AluJb,UNR-bs	diff
chr2:69329974:69330575:+@chr2:69472357:69476302:+	0.29	0.22	0.37	0.17	0.13	0.21	0.12	5.38	(0,0):292,(0,1):570,(1,0):32	0:32,1:570	(0,0):797,(0,1):1936,(1,0):54	0:54,1:1936	chr2	ENST00000303714.4	ANTXR1	ALE	UTR3	IRES,MER91A,PAS,GY-BOX@L4,hsa-miR-661,K-BOX,SF2,ConservedRegion,AT_rich,PAS,Tigger14a,MER117,hsa-miR-608	diff
chr2:69372458:69373488:+@chr2:69472357:69476302:+	0.32	0.26	0.38	0.12	0.1	0.15	0.2	2.81171e+26	(0,0):137,(0,1):570,(1,0):65	0:65,1:570	(0,0):487,(0,1):1936,(1,0):66	0:66,1:1936	chr2	ENST00000303714.4	ANTXR1	ALE	UTR3	LTR79,PAS@L4,hsa-miR-661,K-BOX,SF2,ConservedRegion,AT_rich,PAS,Tigger14a,MER117,hsa-miR-608	diff
chr2:61315493:61316805:+@chr2:61349261:61351411:+	0.54	0.44	0.63	0.27	0.22	0.32	0.27	5.4148e+09	(0,0):101,(0,1):61,(1,0):43	0:43,1:61	(0,0):634,(0,1):345,(1,0):76	0:76,1:345	chr2	ENST00000402291.1	KIAA1841	ALE	UTR3	AluSg,AluSx1,ConservedRegion,AluSp@AluSx,ConservedRegion,PAS	diff
chr17:55709152:55710544:+@chr17:55756910:55757299:+,chr17:55754348:55754420:+	0.16	0.12	0.2	0.05	0.04	0.06	0.11	61943458472606	(0,0):147,(0,1):111,(1,0):69	0:69,1:111	(0,0):583,(0,1):456,(1,0):73	0:73,1:456	chr17	ENST00000416426.2	MSI2	ALE	UTR3	ConservedRegion,PAS@(TTTTG)n,ConservedRegion,BRD-BOX,PAS	diff
chr17:79224671:79225412:-@chr17:79218799:79220473:-	0.61	0.55	0.67	0.39	0.35	0.42	0.22	3.66528e+22	(0,0):106,(0,1):158,(1,0):106	0:106,1:158	(0,0):486,(0,1):778,(1,0):205	0:205,1:778	chr17	ENST00000542075.1	SLC38A10	ALE	UTR3	PAS@SF2,PAS	diff
chr17:80042911:80043032:-@chr17:80036214:80037156:-	0.65	0.57	0.72	0.77	0.74	0.79	-0.12	8.29	(0,0):3093,(0,1):309,(1,0):32	0:32,1:309	(0,0):21670,(0,1):1950,(1,0):354	0:354,1:1950	chr17	ENST00000306749.2	FASN	ALE	UTR3	NA@hsa-miR-15a,hsa-miR-103,ConservedRegion,PAS,hsa-miR-16,(CACCC)n	diff
chr17:80111486:80115824:-@chr17:80059346:80059742:-	0.14	0.11	0.17	0.31	0.27	0.36	-0.17	6.74726e+31	(0,0):216,(0,1):103,(1,0):215	0:215,1:103	(0,0):639,(0,1):97,(1,0):580	0:580,1:97	chr17	ENST00000392347.1	CCDC57	ALE	UTR3	L1MC4,AluSz,PAS,GY-BOX@PAS	diff
chr17:57075561:57076820:-@chr17:57060000:57060282:-	0.85	0.77	0.92	0.59	0.54	0.65	0.26	1.62039e+11	(0,0):139,(0,1):10,(1,0):334	0:334,1:10	(0,0):662,(0,1):84,(1,0):697	0:697,1:84	chr17	ENST00000393066.3	TRIM37	ALE	UTR3	ConservedRegion,K-BOX,PAS@SF2,ConservedRegion,PAS	diff
chr17:29548868:29549782:+@chr17:29701031:29704695:+	0.14	0.06	0.25	0.02	0.01	0.03	0.12	18.22	(0,0):607,(0,1):182,(1,0):6	0:6,1:182	(0,0):7168,(0,1):2106,(1,0):9	0:9,1:2106	chr17	ENST00000358273.4	NF1	ALE	UTR3	ConservedRegion,Charlie5,PAS@hsa-miR-448,hsa-miR-103,ConservedRegion,AT_rich,PAS,GY-BOX,hsa-miR-27b,UNR-bs	diff
chr17:38245459:38246290:+@chr17:38249273:38250120:+	0.36	0.32	0.4	0.52	0.48	0.55	-0.16	342604	(0,0):622,(0,1):313,(1,0):172	0:172,1:313	(0,0):969,(0,1):285,(1,0):296	0:296,1:285	chr17	ENST00000394121.4	THRA	ALE	UTR3	ConservedRegion@ConservedRegion,PAS,L2b	diff
chr17:38245459:38246290:+@chr17:38249390:38250118:+	0.36	0.31	0.4	0.52	0.48	0.57	-0.16	4.51937e+07	(0,0):667,(0,1):268,(1,0):172	0:172,1:268	(0,0):1021,(0,1):233,(1,0):296	0:296,1:233	chr17	ENST00000394121.4	THRA	ALE	UTR3	ConservedRegion@ConservedRegion,PAS,L2b	diff
chr17:5239783:5239984:+@chr17:5286890:5289132:+,chr17:5286417:5286863:+	0.3	0.22	0.39	0.14	0.1	0.18	0.16	21.96	(0,0):1128,(0,1):1028,(1,0):22	0:22,1:1028	(0,0):4574,(0,1):3542,(1,0):27	0:27,1:3542	chr17	ENST00000537505.1	RABEP1	ALE	UTR3	NA@ConservedRegion,PAS	diff
chr17:5239783:5239984:+@chr17:5280411:5280600:+	0.25	0.17	0.34	0.1	0.07	0.14	0.15	80.89	(0,0):934,(0,1):63,(1,0):22	0:22,1:63	(0,0):3737,(0,1):233,(1,0):27	0:27,1:233	chr17	ENST00000537505.1	RABEP1	ALE	UTR3	NA@NA	diff
chr3:183701541:183702682:-,chr3:183703092:183703166:-@chr3:183637724:183639189:-	0.53	0.45	0.61	0.31	0.25	0.37	0.22	616.32	(0,0):281,(0,1):75,(1,0):69	0:69,1:75	(0,0):977,(0,1):198,(1,0):72	0:72,1:198	chr3	ENST00000334444.6	ABCC5	ALE	UTR3	ConservedRegion,PAS@hsa-miR-15a,hsa-miR-15b,hsa-miR-98,ConservedRegion,BRD-BOX,PAS,hsa-miR-335,hsa-let-7f,hsa-miR-101,hsa-miR-16	diff
chr3:183701541:183702682:-@chr3:183637724:183639189:-	0.53	0.44	0.61	0.31	0.25	0.37	0.22	4399.89	(0,0):274,(0,1):75,(1,0):65	0:65,1:75	(0,0):969,(0,1):198,(1,0):68	0:68,1:198	chr3	ENST00000334444.6	ABCC5	ALE	UTR3	ConservedRegion,PAS@hsa-miR-15a,hsa-miR-15b,hsa-miR-98,ConservedRegion,BRD-BOX,PAS,hsa-miR-335,hsa-let-7f,hsa-miR-101,hsa-miR-16	diff
chr3:44399709:44401294:+@chr3:44448934:44450940:+	0.39	0.32	0.47	0.24	0.2	0.29	0.15	15.9	(0,0):139,(0,1):102,(1,0):51	0:51,1:102	(0,0):336,(0,1):262,(1,0):66	0:66,1:262	chr3	ENST00000417237.1	TCAIM	ALE	UTR3	MER77,FLAM_A,ConservedRegion,K-BOX,MER2,PAS@ConservedRegion,AT_rich,PAS,AluJb	diff
chr3:14489090:14489691:+@chr3:14526375:14530857:+	0.56	0.49	0.64	0.39	0.33	0.44	0.17	72.14	(0,0):293,(0,1):305,(1,0):48	0:48,1:305	(0,0):644,(0,1):1026,(1,0):77	0:77,1:1026	chr3	ENST00000427436.1	SLC6A6	ALE	UTR3	ConservedRegion,MIRb,PAS@hsa-miR-30c,MIRb,hsa-miR-26b,(TG)n,hsa-miR-561,AT_rich,BRD-BOX,ConservedRegion,PAS,hsa-miR-581,MIR3,hsa-miR-26a,GY-BOX,hsa-miR-27b,hsa-miR-30e	diff
chr3:183854400:183855167:+@chr3:183862672:183863099:+	0.27	0.22	0.32	0.14	0.11	0.17	0.13	256144	(0,0):874,(0,1):130,(1,0):91	0:91,1:130	(0,0):1741,(0,1):246,(1,0):76	0:76,1:246	chr3	ENST00000444495.1	EIF2B5	ALE	UTR3	ConservedRegion,L2a,uORF,PAS@ConservedRegion,PAS	diff
chr3:51433298:51434555:-,chr3:51436166:51436258:-@chr3:51435273:51436258:-	0.82	0.77	0.86	0.6	0.56	0.63	0.22	2.37396e+48	(0,0):255,(0,1):50,(1,0):322,(1,1):4	0:326,1:50	(0,0):404,(0,1):267,(1,0):557,(1,1):20	0:571,1:273	chr3	ENST00000323686	ENSG00000179837	ALE	UTR3	ConservedRegion,PAS,UNR-bs@NA	diff
chr3:47161957:47166038:-@chr3:47057906:47058744:-	0.26	0.2	0.33	0.43	0.4	0.45	-0.17	35.44	(0,0):216,(0,1):58,(1,0):104	0:104,1:58	(0,0):2610,(0,1):459,(1,0):1770	0:1770,1:459	chr3	ENST00000412450.1	SETD2	ALE	UTR3	ConservedRegion,BRD-BOX,K-BOX,SF2,PAS,GY-BOX@hsa-miR-559,ConservedRegion,hsa-miR-548c-5p,PAS	diff
chr19:10941654:10942579:+@chr19:10942980:10944160:+	0.19	0.16	0.21	0.42	0.4	0.44	-0.23	4.4403e+239	(0,0):129,(0,1):937,(1,0):165	0:165,1:937	(0,0):228,(0,1):1227,(1,0):684	0:684,1:1227	chr19	ENST00000585892.1	DNM2	ALE	UTR3	ConservedRegion,PAS@ConservedRegion,PAS,UNR-bs	diff
chr19:10941657:10942579:+@chr19:10942980:10944160:+	0.19	0.16	0.21	0.42	0.4	0.44	-0.23	2.33538e+279	(0,0):129,(0,1):937,(1,0):165	0:165,1:937	(0,0):225,(0,1):1227,(1,0):682	0:682,1:1227	chr19	ENST00000585892.1	DNM2	ALE	UTR3	ConservedRegion,PAS@ConservedRegion,PAS,UNR-bs	diff
chr19:3544197:3544730:-@chr19:3538263:3538754:-,chr19:3542774:3542975:-	0.71	0.66	0.75	0.56	0.51	0.6	0.15	3.19798e+07	(0,0):296,(0,1):129,(1,0):230	0:230,1:129	(0,0):560,(0,1):258,(1,0):243	0:243,1:258	chr19	ENST00000355415.2	MFSD12	ALE	UTR3	PAS@K-BOX,(TTTTG)n,(CAAAA)n,PAS,L1MB5	diff
chr19:16964954:16966535:+@chr19:16989308:16991164:+	0.51	0.47	0.56	0.36	0.33	0.39	0.15	3.02593e+11	(0,0):969,(0,1):272,(1,0):243	0:243,1:272	(0,0):2370,(0,1):817,(1,0):385	0:385,1:817	chr19	ENST00000379803.1	SIN3B	ALE	UTR3	NA@ConservedRegion,PAS	diff
chr19:15357847:15360101:-@chr19:15348301:15349256:-	0.47	0.43	0.51	0.26	0.24	0.28	0.21	5.54377e+72	(0,0):337,(0,1):188,(1,0):417	0:417,1:188	(0,0):1023,(0,1):654,(1,0):566	0:566,1:654	chr19	ENST00000263377.1	BRD4	ALE	UTR3	ConservedRegion,BRD-BOX@T-rich,hsa-miR-204,ConservedRegion,hsa-miR-211	diff
chr19:15366875:15367074:-@chr19:15357847:15360101:-	0.53	0.44	0.62	0.72	0.67	0.77	-0.19	173.73	(0,0):315,(0,1):417,(1,0):28	0:28,1:417	(0,0):744,(0,1):566,(1,0):87	0:87,1:566	chr19	ENST00000263377.1	BRD4	ALE	UTR3	A-rich@ConservedRegion,BRD-BOX	diff
chr19:37440414:37442450:+@chr19:37469906:37471218:+	0.59	0.48	0.69	0.81	0.76	0.86	-0.22	198.65	(0,0):73,(0,1):28,(1,0):63	0:63,1:28	(0,0):240,(0,1):40,(1,0):281	0:281,1:40	chr19	ENST00000444991.1	ZNF568	ALE	UTR3	L1M5,K-BOX,PAS@NA	diff
chr19:37469906:37471218:+@chr19:37487219:37488337:+	0.4	0.28	0.52	0.18	0.13	0.23	0.22	16.4	(0,0):41,(0,1):36,(1,0):28	0:28,1:36	(0,0):81,(0,1):159,(1,0):40	0:40,1:159	chr19	ENST00000444991.1	ZNF568	ALE	UTR3	NA@ConservedRegion	diff
chr19:33428438:33428579:-@chr19:33369904:33370284:-	0.34	0.17	0.51	0.05	0.01	0.13	0.29	113.81	(0,0):377,(0,1):55,(1,0):6	0:6,1:55	(0,0):1214,(0,1):175,(1,0):1	0:1,1:175	chr19	ENST00000305768.4	CEP89	ALE	UTR3	PAS@PAS	diff
chr19:33428438:33428579:-@chr19:33406243:33406423:-	0.3	0.13	0.49	0.04	0.01	0.09	0.26	13.08	(0,0):201,(0,1):23,(1,0):6	0:6,1:23	(0,0):629,(0,1):85,(1,0):1	0:1,1:85	chr19	ENST00000305768.4	CEP89	ALE	UTR3	PAS@ConservedRegion	diff
chr19:49639981:49640497:+@chr19:49653493:49654280:+,chr19:49653337:49653408:+	0.09	0.04	0.17	0.28	0.2	0.36	-0.19	17.62	(0,0):207,(0,1):125,(1,0):6	0:6,1:125	(0,0):380,(0,1):120,(1,0):26	0:26,1:120	chr19	ENST00000334186.3	PPFIA3	ALE	UTR3	ConservedRegion,(CCCTG)n@SF2,ConservedRegion,hsa-miR-619,hsa-miR-7,GY-BOX	diff
chr19:49639981:49640497:+@chr19:49653514:49654278:+,chr19:49653337:49653408:+	0.1	0.05	0.18	0.33	0.23	0.42	-0.23	37.74	(0,0):231,(0,1):101,(1,0):6	0:6,1:101	(0,0):406,(0,1):94,(1,0):26	0:26,1:94	chr19	ENST00000334186.3	PPFIA3	ALE	UTR3	ConservedRegion,(CCCTG)n@SF2,ConservedRegion,hsa-miR-7,GY-BOX	diff
chr19:44679137:44679582:+@chr19:44679651:44681838:+	0.51	0.44	0.58	0.28	0.24	0.32	0.23	3.16316e+09	(0,0):60,(0,1):322,(1,0):59	0:59,1:322	(0,0):91,(0,1):1358,(1,0):92	0:92,1:1358	chr19	ENST00000590578.1	ZNF226	ALE	UTR3	NA@SF2	diff
chr19:49639981:49640497:+@chr19:49653337:49654278:+	0.1	0.04	0.17	0.31	0.22	0.4	-0.21	234.72	(0,0):211,(0,1):121,(1,0):6	0:6,1:121	(0,0):383,(0,1):117,(1,0):26	0:26,1:117	chr19	ENST00000334186.3	PPFIA3	ALE	UTR3	ConservedRegion,(CCCTG)n@SF2,ConservedRegion,hsa-miR-619,hsa-miR-7,GY-BOX	diff
chr22:21831669:21832204:-@chr22:21827287:21827694:-	0.14	0.1	0.19	0.27	0.22	0.32	-0.13	38.9	(0,0):192,(0,1):106,(1,0):23	0:23,1:106	(0,0):480,(0,1):206,(1,0):103	0:103,1:206	chr22	ENST00000467443.1	PI4KAP2	ALE	UTR3	NA@NA	diff
chr22:38119192:38122510:+@chr22:38155424:38155961:+	0.04	0.03	0.07	0.18	0.13	0.24	-0.14	4.12668e+06	(0,0):1248,(0,1):76,(1,0):23	0:23,1:76	(0,0):1579,(0,1):49,(1,0):72	0:72,1:49	chr22	ENST00000492485.1	TRIOBP	ALE	UTR3	NA@MER20,MIRb,ConservedRegion,PAS,MER63D	diff
chr22:38119192:38122577:+@chr22:38155424:38155961:+	0.04	0.03	0.07	0.18	0.13	0.23	-0.14	6.85162e+09	(0,0):1248,(0,1):76,(1,0):23	0:23,1:76	(0,0):1579,(0,1):49,(1,0):72	0:72,1:49	chr22	ENST00000492485.1	TRIOBP	ALE	UTR3	NA@MER20,MIRb,ConservedRegion,PAS,MER63D	diff
chr18:32409005:32409292:+@chr18:32470264:32470583:+	0.37	0.27	0.47	0.15	0.1	0.21	0.22	1084.88	(0,0):538,(0,1):53,(1,0):27	0:27,1:53	(0,0):1859,(0,1):162,(1,0):25	0:25,1:162	chr18	ENST00000315456.6	DTNA	ALE	UTR3	ConservedRegion,PAS@ConservedRegion	diff
chr18:32409005:32409292:+@chr18:32446075:32448776:+,chr18:32443934:32444026:+	0.89	0.83	0.93	0.72	0.61	0.8	0.17	40.64	(0,0):99,(0,1):39,(1,0):27	0:27,1:39	(0,0):362,(0,1):117,(1,0):25	0:25,1:117	chr18	ENST00000315456.6	DTNA	ALE	UTR3	ConservedRegion,PAS@L4,ConservedRegion,BRD-BOX,PAS,(TTAAA)n,UNR-bs	diff
chr18:42456530:42457378:+@chr18:42643044:42644773:+	0.24	0.1	0.41	0.02	0	0.06	0.22	27.08	(0,0):122,(0,1):30,(1,0):4	0:4,1:30	(0,0):699,(0,1):240,(1,0):1	0:1,1:240	chr18	ENST00000426838.4	SETBP1	ALE	UTR3	MER5C1,K-BOX,PAS,GY-BOX@ConservedRegion	diff
chr18:32823116:32824033:+@chr18:32825226:32827152:+	0.55	0.46	0.64	0.34	0.29	0.39	0.21	1022.07	(0,0):22,(0,1):70,(1,0):40	0:40,1:70	(0,0):167,(0,1):491,(1,0):115	0:115,1:491	chr18	ENST00000330501.7	ZNF397	ALE	UTR3	SF2,L2c@SF2,ConservedRegion,L2b	diff
chr18:32825226:32827152:+@chr18:32837892:32838359:+	0.49	0.36	0.63	0.75	0.68	0.81	-0.26	47.61	(0,0):256,(0,1):16,(1,0):70	0:70,1:16	(0,0):1084,(0,1):35,(1,0):491	0:491,1:35	chr18	ENST00000330501.7	ZNF397	ALE	UTR3	ConservedRegion,SF2,L2b@LTR16A1,PAS,AluYk4	diff
chr1:6692856:6693621:+@chr1:6694080:6695645:+	0.57	0.54	0.6	0.36	0.34	0.39	0.21	7.73438e+138	(0,0):108,(0,1):871,(1,0):536	0:536,1:871	(0,0):133,(0,1):1684,(1,0):445	0:445,1:1684	chr1	ENST00000054650.4	THAP3	ALE	UTR3	ConservedRegion,PAS@ConservedRegion,AT_rich,PAS	diff
chr1:144951761:144952376:-@chr1:144851427:144852499:-	0.82	0.74	0.89	0.63	0.55	0.7	0.19	28.68	(0,0):1357,(0,1):18,(1,0):48	0:48,1:18	(0,0):5051,(0,1):67,(1,0):63	0:63,1:67	chr1	ENST00000313382.9	PDE4DIP	ALE	UTR3	PAS,L2c@ConservedRegion,PAS	diff
chr1:35470733:35470873:-@chr1:35449368:35449548:-	0.09	0.03	0.17	0.36	0.24	0.49	-0.27	13453.2	(0,0):207,(0,1):60,(1,0):3	0:3,1:60	(0,0):437,(0,1):51,(1,0):17	0:17,1:51	chr1	ENST00000493328.1	ZMYM6	ALE	UTR3	NA@NA	diff
chr1:144951761:144952376:-@chr1:144902728:144903204:-	0.23	0.17	0.29	0.12	0.09	0.15	0.11	71.91	(0,0):1045,(0,1):124,(1,0):48	0:48,1:124	(0,0):3640,(0,1):352,(1,0):63	0:63,1:352	chr1	ENST00000313382.9	PDE4DIP	ALE	UTR3	PAS,L2c@SF2,ConservedRegion	diff
chr1:144951761:144952376:-@chr1:144890591:144892589:-	0.9	0.85	0.94	0.75	0.67	0.81	0.15	197.37	(0,0):1231,(0,1):18,(1,0):48	0:48,1:18	(0,0):4542,(0,1):75,(1,0):63	0:63,1:75	chr1	ENST00000313382.9	PDE4DIP	ALE	UTR3	PAS,L2c@ConservedRegion,PAS	diff
chr1:229734941:229738666:-@chr1:229728864:229730841:-	0.26	0.24	0.28	0.37	0.36	0.39	-0.11	5.20232e+71	(0,0):173,(0,1):1096,(1,0):741	0:741,1:1096	(0,0):249,(0,1):1334,(1,0):1536	0:1536,1:1334	chr1	ENST00000366676.1	TAF5L	ALE	UTR3	L1MB7,BRD-BOX,SF2,AT_rich,PAS,UNR-bs@ConservedRegion,PAS,(TTA)n,UNR-bs	diff
chr1:35562918:35566700:+@chr1:35578578:35581455:+	0.48	0.39	0.58	0.22	0.2	0.25	0.26	2.04725e+10	(0,0):78,(0,1):48,(1,0):59	0:59,1:48	(0,0):426,(0,1):545,(1,0):208	0:208,1:545	chr1	ENST00000417119.1	ZMYM1	ALE	UTR3	ConservedRegion,IRES,uORF@K-BOX,BRD-BOX,ConservedRegion,PAS,GY-BOX,L1MC4a	diff
chr1:14113010:14114571:+@chr1:14149654:14151575:+,chr1:14142922:14143065:+	0.7	0.63	0.75	0.82	0.79	0.85	-0.12	24.64	(0,0):23,(0,1):68,(1,0):118	0:118,1:68	(0,0):67,(0,1):144,(1,0):495	0:495,1:144	chr1	ENST00000235372.6	PRDM2	ALE	UTR3	hsa-miR-105,hsa-let-7g,hsa-miR-98,ConservedRegion,AT_rich,PAS,hsa-let-7f@hsa-miR-448,hsa-miR-204,(CGTG)n,ConservedRegion,PAS,UNR-bs	diff
chr1:14105119:14106820:+@chr1:14149654:14151575:+	0.72	0.66	0.78	0.87	0.85	0.89	-0.15	5.65961e+08	(0,0):395,(0,1):60,(1,0):135	0:135,1:60	(0,0):1994,(0,1):125,(1,0):741	0:741,1:125	chr1	ENST00000235372.6	PRDM2	ALE	UTR3	SF2SAN_20@hsa-miR-448,hsa-miR-204,(CGTG)n,ConservedRegion,PAS,UNR-bs	diff
chr1:14113010:14114571:+@chr1:14149654:14151575:+	0.71	0.64	0.77	0.83	0.8	0.86	-0.12	51.77	(0,0):31,(0,1):60,(1,0):118	0:118,1:60	(0,0):86,(0,1):125,(1,0):495	0:495,1:125	chr1	ENST00000235372.6	PRDM2	ALE	UTR3	hsa-miR-105,hsa-let-7g,hsa-miR-98,ConservedRegion,AT_rich,PAS,hsa-let-7f@hsa-miR-448,hsa-miR-204,(CGTG)n,ConservedRegion,PAS,UNR-bs	diff
chr1:94944080:94944260:+@chr1:94982608:94984219:+	0.34	0.14	0.57	0.06	0.02	0.12	0.28	5.7	(0,0):143,(0,1):108,(1,0):4	0:4,1:108	(0,0):1893,(0,1):1239,(1,0):5	0:5,1:1239	chr1	ENST00000394233.2	ABCD3	ALE	UTR3	FLAM_C,PAS@K-BOX,ConservedRegion,AT_rich,PAS,UNR-bs	diff
chr1:235343475:235346108:-@chr1:235294949:235295312:-	0.04	0.02	0.05	0.25	0.23	0.28	-0.21	7.05177e+257	(0,0):672,(0,1):83,(1,0):26	0:26,1:83	(0,0):3281,(0,1):271,(1,0):805	0:805,1:271	chr1	ENST00000349213.3	ARID4B	ALE	UTR3	SF2@ConservedRegion,PAS	diff
chr1:144821921:144822084:+@chr1:145368441:145370195:+	0.86	0.77	0.92	0.71	0.64	0.77	0.15	6.52	(0,0):5495,(0,1):45,(1,0):17	0:17,1:45	(0,0):14901,(0,1):268,(1,0):36	0:36,1:268	chr1	ENST00000375552.3	NBPF9	ALE	UTR3	NA@NA	diff
chr1:235992708:235993724:-@chr1:235824346:235826378:-	0.47	0.3	0.66	0.22	0.16	0.27	0.25	7.12	(0,0):155,(0,1):26,(1,0):11	0:11,1:26	(0,0):1802,(0,1):313,(1,0):41	0:41,1:313	chr1	ENST00000489585.1	LYST	ALE	UTR3	NA@hsa-miR-448,hsa-miR-15a,hsa-miR-25,hsa-miR-15b,ConservedRegion,AT_rich,PAS,hsa-miR-16	diff
chr1:155447677:155452240:-@chr1:155305052:155307542:-	0.39	0.32	0.47	0.54	0.52	0.56	-0.15	22.39	(0,0):171,(0,1):68,(1,0):82	0:82,1:68	(0,0):2392,(0,1):702,(1,0):1533	0:1533,1:702	chr1	ENST00000368346.3	ASH1L	ALE	UTR3	NA@hsa-miR-103,hsa-miR-548d-5p,hsa-miR-15b,(TG)n,hsa-miR-548d-3p,ConservedRegion,hsa-miR-561,AT_rich,hsa-miR-106b,PAS,hsa-miR-16,UNR-bs	diff
chr1:35451767:35454536:-@chr1:35449368:35449548:-	0.03	0.02	0.04	0.16	0.13	0.21	-0.13	6.80088e+29	(0,0):147,(0,1):60,(1,0):39	0:39,1:60	(0,0):127,(0,1):51,(1,0):241	0:241,1:51	chr1	ENST00000493328.1	ZMYM6	ALE	UTR3	ConservedRegion,AluSq2,MER58B,AT_rich,PAS@NA	diff
chr1:144951761:144952376:-@chr1:144890591:144892219:-	0.9	0.84	0.95	0.76	0.69	0.82	0.14	14.34	(0,0):1235,(0,1):14,(1,0):48	0:48,1:14	(0,0):4560,(0,1):57,(1,0):63	0:63,1:57	chr1	ENST00000313382.9	PDE4DIP	ALE	UTR3	PAS,L2c@ConservedRegion,PAS	diff
chr1:14105119:14106820:+@chr1:14149654:14151575:+,chr1:14142922:14143065:+	0.71	0.64	0.77	0.86	0.84	0.88	-0.15	5.19866e+09	(0,0):387,(0,1):68,(1,0):135	0:135,1:68	(0,0):1975,(0,1):144,(1,0):741	0:741,1:144	chr1	ENST00000235372.6	PRDM2	ALE	UTR3	SF2SAN_20@hsa-miR-448,hsa-miR-204,(CGTG)n,ConservedRegion,PAS,UNR-bs	diff
chr1:235330210:235331967:-@chr1:235294949:235295312:-	0.07	0.05	0.1	0.33	0.3	0.36	-0.26	1.0017e+202	(0,0):609,(0,1):83,(1,0):37	0:37,1:83	(0,0):1940,(0,1):271,(1,0):772	0:772,1:271	chr1	ENST00000349213.3	ARID4B	ALE	UTR3	hsa-miR-218,hsa-miR-93,ConservedRegion,hsa-miR-30c,hsa-miR-106b,PAS,hsa-miR-30e@ConservedRegion,PAS	diff
chr1:235340954:235341228:-@chr1:235294949:235295312:-	0.04	0.01	0.09	0.19	0.14	0.24	-0.15	9798.58	(0,0):670,(0,1):83,(1,0):1	0:1,1:83	(0,0):3166,(0,1):271,(1,0):42	0:42,1:271	chr1	ENST00000349213.3	ARID4B	ALE	UTR3	ConservedRegion,SF2,AT_rich@ConservedRegion,PAS	diff
chr1:91403829:91406866:-@chr1:91380857:91382547:-	0.26	0.22	0.31	0.51	0.49	0.53	-0.25	1.52688e+92	(0,0):74,(0,1):157,(1,0):101	0:101,1:157	(0,0):799,(0,1):884,(1,0):1701	0:1701,1:884	chr1	ENST00000347275.5	ZNF644	ALE	UTR3	SF2@ConservedRegion,PAS	diff
chr1:46072154:46075186:+@chr1:46083733:46084567:+	0.28	0.25	0.32	0.5	0.48	0.52	-0.22	7.21254e+106	(0,0):1511,(0,1):175,(1,0):268	0:268,1:175	(0,0):5870,(0,1):643,(1,0):2518	0:2518,1:643	chr1	ENST00000453748.1	NASP	ALE	UTR3	SF2SAN_63,ConservedRegion,BRD-BOX,SF2,PAS,SF2SAN_61,SF2SAN_62,UNR-bs@SF2,ConservedRegion,PAS	diff
chr14:21851041:21851928:-@chr14:21819636:21820977:-	0.22	0.17	0.27	0.02	0.02	0.03	0.2	6.20931e+43	(0,0):555,(0,1):281,(1,0):49	0:49,1:281	(0,0):9602,(0,1):3316,(1,0):52	0:52,1:3316	chr14	ENST00000216297.2	SUPT16H	ALE	UTR3	NA@K-BOX,hsa-miR-15b,SF2,hsa-miR-224,ConservedRegion,PAS,hsa-miR-16	diff
chr10:65358930:65359065:+@chr10:65380573:65381972:+	0.64	0.55	0.73	0.46	0.38	0.54	0.18	7.41	(0,0):351,(0,1):274,(1,0):24	0:24,1:274	(0,0):795,(0,1):894,(1,0):37	0:37,1:894	chr10	ENST00000373758.4	REEP3	ALE	UTR3	NA@ConservedRegion,AT_rich,PAS	diff
chr10:74994951:74995202:+@chr10:75000704:75001939:+	0.77	0.7	0.83	0.6	0.5	0.69	0.17	12.69	(0,0):79,(0,1):71,(1,0):38	0:38,1:71	(0,0):225,(0,1):146,(1,0):34	0:34,1:146	chr10	ENST00000372955.3	FAM149B1	ALE	UTR3	ConservedRegion,PAS@ConservedRegion,AT_rich,PAS	diff
chr10:69828767:69830356:-@chr10:69681656:69682896:-	0.43	0.31	0.55	0.14	0.1	0.18	0.29	26307.7	(0,0):131,(0,1):32,(1,0):32	0:32,1:32	(0,0):1035,(0,1):174,(1,0):35	0:35,1:174	chr10	ENST00000412272.2	HERC4	ALE	UTR3	NA@ConservedRegion,AT_rich,PAS	diff
chr10:127524673:127525124:+@chr10:127529824:127531376:+	0.68	0.64	0.71	0.57	0.54	0.6	0.11	52403.7	(0,0):602,(0,1):478,(1,0):257	0:257,1:478	(0,0):984,(0,1):1087,(1,0):371	0:371,1:1087	chr10	ENST00000368759.5	BCCIP	ALE	UTR3	ConservedRegion,AT_rich,PAS@K-BOX,ConservedRegion,L1MEc,PAS,GY-BOX	diff
chr10:127529824:127531376:+@chr10:127541694:127542264:+	0.47	0.43	0.51	0.64	0.6	0.67	-0.17	1.05158e+11	(0,0):371,(0,1):184,(1,0):478	0:478,1:184	(0,0):610,(0,1):208,(1,0):1087	0:1087,1:208	chr10	ENST00000368759.5	BCCIP	ALE	UTR3	ConservedRegion,L1MEc,K-BOX,PAS,GY-BOX@AT_rich,PAS	diff
chr10:44872510:44874171:-@chr10:44865605:44868791:-	0.64	0.55	0.72	0.45	0.37	0.53	0.19	11.27	(0,0):17,(0,1):59,(1,0):55	0:55,1:59	(0,0):44,(0,1):120,(1,0):51	0:51,1:120	chr10	ENST00000395795.4	CXCL12	ALE	UTR3	hsa-miR-23a,BRD-BOX,ConservedRegion,hsa-miR-23b,PAS@ConservedRegion,PAS,hsa-miR-23b,GY-BOX	diff
chr10:21845572:21846111:+@chr10:21962279:21962939:+	0.54	0.44	0.63	0.26	0.19	0.32	0.28	2.03566e+06	(0,0):82,(0,1):49,(1,0):46	0:46,1:49	(0,0):404,(0,1):148,(1,0):40	0:40,1:148	chr10	ENST00000377072.3	MLLT10	ALE	UTR3	HAL1,PAS@SF2,BRD-BOX	diff
chr15:42741969:42744152:-@chr15:42705021:42709558:-	0.27	0.21	0.33	0.44	0.41	0.46	-0.17	6.96518e+08	(0,0):207,(0,1):281,(1,0):48	0:48,1:281	(0,0):1800,(0,1):1889,(1,0):688	0:688,1:1889	chr15	ENST00000263805.4	ZFP106	ALE	UTR3	SF2@NA	diff
chr15:55651737:55653142:-@chr15:55647447:55648607:-	0.5	0.36	0.63	0.78	0.75	0.81	-0.28	6211.19	(0,0):29,(0,1):24,(1,0):29	0:29,1:24	(0,0):449,(0,1):145,(1,0):633	0:633,1:145	chr15	ENST00000442196.3	CCPG1	ALE	UTR3	ConservedRegion@ConservedRegion,uORF,PAS	diff
chr9:15470644:15471309:-@chr9:15464065:15465578:-	0.49	0.4	0.57	0.24	0.21	0.26	0.25	8.39409e+11	(0,0):126,(0,1):121,(1,0):48	0:48,1:121	(0,0):1554,(0,1):1756,(1,0):224	0:224,1:1756	chr9	ENST00000380733.4	PSIP1	ALE	UTR3	ConservedRegion,(T)n,AT_rich,PAS@ConservedRegion,PAS	diff
chr9:15470642:15471229:-@chr9:15464065:15465578:-	0.52	0.43	0.6	0.26	0.23	0.29	0.26	2.70697e+16	(0,0):123,(0,1):121,(1,0):47	0:47,1:121	(0,0):1547,(0,1):1756,(1,0):220	0:220,1:1756	chr9	ENST00000380733.4	PSIP1	ALE	UTR3	ConservedRegion,(T)n,AT_rich,PAS@ConservedRegion,PAS	diff
chr9:123631853:123632223:-@chr9:123617931:123620564:-	0.82	0.8	0.83	0.66	0.63	0.69	0.16	4.50108e+84	(0,0):565,(0,1):978,(1,0):506	0:506,1:978	(0,0):647,(0,1):1300,(1,0):298	0:298,1:1300	chr9	ENST00000373896.3	PHF19	ALE	UTR3	ConservedRegion,MIRc,PAS@ConservedRegion,PAS	diff
chr9:135786389:135786955:-@chr9:135766736:135772141:-	0.35	0.27	0.44	0.19	0.14	0.23	0.16	15.18	(0,0):351,(0,1):577,(1,0):29	0:29,1:577	(0,0):947,(0,1):2011,(1,0):42	0:42,1:2011	chr9	ENST00000298552.3	TSC1	ALE	UTR3	ConservedRegion,PAS@hsa-miR-25,CR1_Mam,hsa-miR-98,(T)n,ConservedRegion,BRD-BOX,hsa-miR-32,PAS,hsa-let-7f,UNR-bs	diff
chr9:69256639:69256889:-@chr9:69204538:69205069:-	0.95	0.9	0.98	0.84	0.78	0.89	0.11	8.11	(0,0):171,(0,1):8,(1,0):60	0:60,1:8	(0,0):369,(0,1):34,(1,0):70	0:70,1:34	chr9	ENST00000377457.5	CBWD6	ALE	UTR3	NA@NA	diff
chr9:80881358:80881983:+@chr9:80885757:80886799:+	0.77	0.69	0.84	0.61	0.57	0.66	0.16	15.76	(0,0):13,(0,1):32,(1,0):61	0:61,1:32	(0,0):96,(0,1):264,(1,0):238	0:238,1:264	chr9	ENST00000376597.4	CEP78	ALE	UTR3	ConservedRegion,PAS@NA	diff
chr9:36085172:36086191:+@chr9:36122821:36124448:+	0.75	0.62	0.85	0.48	0.39	0.57	0.27	16.71	(0,0):57,(0,1):13,(1,0):25	0:25,1:13	(0,0):215,(0,1):75,(1,0):42	0:42,1:75	chr9	ENST00000377966.3	RECK	ALE	UTR3	K-BOX,PAS,AluJr@hsa-miR-15a,K-BOX,hsa-miR-15b,ConservedRegion,AT_rich,PAS,hsa-miR-21,hsa-miR-16	diff
chr9:36085263:36086131:+@chr9:36122821:36124448:+	0.75	0.61	0.86	0.52	0.43	0.61	0.23	5.19	(0,0):59,(0,1):13,(1,0):20	0:20,1:13	(0,0):216,(0,1):75,(1,0):41	0:41,1:75	chr9	ENST00000377966.3	RECK	ALE	UTR3	K-BOX,AluJr@hsa-miR-15a,K-BOX,hsa-miR-15b,ConservedRegion,AT_rich,PAS,hsa-miR-21,hsa-miR-16	diff
chr3:49044637:49044964:+@chr3:49046342:49046342:+@chr3:49048854:49048854:+@chr3:49049455:49050132:+	0.1	0.01	0.31	0.56	0.36	0.72	-0.46	16.11	(0,0):157,(0,1):15,(1,1):135	0:7,1:143	(0,0):891,(0,1):23,(1,1):899	0:383,1:539	chr3	ENST00000395474.3	WDR6	MXE	CDS	NA	diff
chr8:144679518:144679845:-@chr8:144674885:144674885:-@chr8:144674817:144674817:-@chr8:144672778:144672908:-	0.54	0.26	0.9	0.94	0.81	1	-0.4	5.72	(0,0):683,(1,0):10,(1,1):38	0:34,1:14	(0,0):1470,(1,0):34,(1,1):18	0:49,1:3	chr8	ENST00000526838.1	EEF1D	MXE	UTR5	IRES	diff
chr19:46195145:46195442:-@chr19:46193830:46193830:-@chr19:46192491:46192491:-@chr19:46191645:46191824:-	0.7	0.59	0.8	0.38	0.2	0.54	0.32	23.82	(0,0):4025,(0,1):35,(1,1):3188	0:2193,1:1030	(0,0):2705,(0,1):49,(1,1):2083	0:916,1:1216	chr19	ENST00000342669.3	SNRPD2	MXE	CDS	AluSz,L2	diff
chr8:144679518:144679845:-@chr8:144674885:144674885:-@chr8:144674817:144674817:-@chr8:144668899:144669022:-	0.05	0.02	0.09	0.17	0.11	0.23	-0.12	121.72	(0,0):1328,(1,0):10,(1,1):370	0:37,1:343	(0,0):2649,(1,0):34,(1,1):391	0:79,1:346	chr8	ENST00000526838.1	EEF1D	MXE	UTR5	IRES	diff
chr8:144679518:144679845:-@chr8:144676063:144676063:-@chr8:144671478:144671478:-@chr8:144668899:144669019:-	0.78	0.72	0.82	0.58	0.52	0.64	0.2	2.07714e+07	(0,0):1237,(0,1):95,(1,0):19,(1,1):357	0:297,1:174	(0,0):2440,(0,1):221,(1,0):35,(1,1):378	0:227,1:407	chr8	ENST00000532741.1	EEF1D	MXE	UTR5	MER53,ConservedRegion,uORF,IRES,FLAM_C,AluY	diff
chr19:50168888:50169132:-@chr19:50167931:50167931:-@chr19:50167844:50167844:-@chr19:50166445:50166771:-	0.8	0.74	0.86	0.94	0.9	0.97	-0.14	46.42	(0,0):375,(0,1):28,(1,0):169,(1,1):277	0:395,1:79	(0,0):426,(0,1):9,(1,0):206,(1,1):300	0:493,1:22	chr19	ENST00000377139.3	IRF3	MXE	CDS	NA	diff
chr9:140507348:140507458:+@chr9:140507875:140507962:+	0.21	0.1	0.37	0.56	0.36	0.83	-0.35	10.71	(0,0):105,(1,0):19,(1,1):31	0:35,1:15	(0,0):154,(1,0):56,(1,1):31	0:69,1:18	chr9	ENST00000371421.4	ARRDC1	RI	CDS	NA	diff
chr15:42126938:42127091:+@chr15:42127168:42127421:+	0.21	0.03	0.52	0.68	0.48	0.87	-0.47	16.33	(0,0):10,(0,1):6,(1,0):2,(1,1):34	0:7,1:35	(0,0):15,(0,1):3,(1,0):16,(1,1):34	0:46,1:7	chr15	ENST00000397299.4	JMJD7	RI	CDS	NA	diff
chr16:30012533:30012851:+@chr16:30013757:30014334:+	0.45	0.33	0.58	0.84	0.7	0.95	-0.39	3903.34	(0,0):286,(1,0):75,(1,1):156	0:134,1:97	(0,0):216,(0,1):2,(1,0):144,(1,1):134	0:268,1:12	chr16	ENST00000563197.1	INO80E	RI	CDS	L2b,ConservedRegion,UNR-bs	diff
chr10:102743705:102743831:-@chr10:102743512:102743574:-	0.18	0.07	0.32	0.77	0.53	0.97	-0.59	1.36957e+06	(0,0):110,(0,1):8,(1,0):5,(1,1):14	0:8,1:19	(0,0):83,(0,1):1,(1,0):20,(1,1):8	0:27,1:2	chr10	ENST00000521006.1	SEMA4G	RI	CDS	NA	diff
chr21:45751726:45751897:-@chr21:45750346:45750799:-	0.24	0.18	0.3	0.61	0.52	0.69	-0.37	1.80703e+26	(0,0):149,(0,1):23,(1,0):66,(1,1):118	0:101,1:106	(0,0):180,(0,1):14,(1,0):258,(1,1):198	0:380,1:90	chr21	ENST00000339818.4	C21orf2	RI	CDS	SF2	diff
chr21:40719173:40719218:-@chr21:40717756:40717884:-	0.08	0.05	0.12	0.44	0.32	0.58	-0.36	2141621829930830	(0,0):900,(0,1):6,(1,0):36,(1,1):31	0:36,1:37	(0,0):877,(0,1):3,(1,0):244,(1,1):40	0:264,1:23	chr21	ENST00000380749.5	HMGN1	RI	CDS	uORF,(TG)n	diff
chr6:43109910:43110037:+@chr6:43111160:43111358:+	0.43	0.27	0.68	0.07	0.05	0.09	0.36	255603	(0,0):55,(1,0):52,(1,1):30	0:69,1:13	(0,0):214,(0,1):1,(1,0):62,(1,1):207	0:79,1:191	chr6	ENST00000230419.4	PTK7	RI	CDS	ConservedRegion	diff
chr19:48259013:48259244:+@chr19:48259785:48259861:+	0.29	0.19	0.42	0.64	0.52	0.76	-0.35	45.81	(0,0):508,(0,1):4,(1,0):33,(1,1):43	0:45,1:35	(0,0):815,(0,1):11,(1,0):155,(1,1):62	0:191,1:37	chr19	ENST00000246802.4	GLTSCR2	RI	CDS	ConservedRegion	diff
chrX:23801917:23802000:+@chrX:23802411:23802520:+	0.07	0.05	0.1	0.18	0.15	0.22	-0.11	2.69596e+07	(0,0):560,(0,1):70,(1,0):40,(1,1):64	0:47,1:127	(0,0):538,(0,1):89,(1,0):137,(1,1):87	0:148,1:165	chrX	ENST00000379270.4	SAT1	RI	CDS	ConservedRegion	diff
chr7:74173110:74173185:+@chr7:74173878:74175020:+	0.27	0.21	0.33	0.38	0.35	0.42	-0.11	12.93	(0,0):54,(0,1):28,(1,0):77,(1,1):385	0:184,1:306	(0,0):182,(0,1):122,(1,0):420,(1,1):1291	0:917,1:916	chr7	ENST00000324896.4	GTF2I	RI	UTR5	K-BOX,ConservedRegion	diff
chr14:73566375:73566458:+@chr14:73569900:73570186:+	0.18	0.1	0.31	0.04	0.03	0.05	0.14	54.42	(0,0):5,(1,0):36,(1,1):20	0:40,1:16	(0,0):360,(0,1):107,(1,0):293,(1,1):517	0:322,1:595	chr14	ENST00000261973.7	RBM25	RI	CDS	ConservedRegion,AT_rich,(TTTTG)n,(TA)n,uORF,GA-rich	diff
chr17:71203320:71203395:+@chr17:71204453:71204643:+	0.58	0.49	0.68	0.36	0.31	0.42	0.22	6029.72	(0,0):61,(0,1):16,(1,0):432,(1,1):90	0:489,1:49	(0,0):128,(0,1):56,(1,0):473,(1,1):138	0:516,1:151	chr17	ENST00000299886.4	COG1	RI	CDS	SF2,ConservedRegion,uORF,PAS	diff
chr17:79649521:79649705:-@chr17:79649064:79649179:-	0.09	0.05	0.14	0.27	0.2	0.37	-0.18	2650.68	(0,0):423,(1,0):18,(1,1):150	0:24,1:144	(0,0):266,(1,0):47,(1,1):118	0:72,1:93	chr17	ENST00000397498.4	ARL16	RI	CDS	ConservedRegion,AluYc,AluY	diff
chr17:79650043:79650156:-@chr17:79649064:79649705:-	0.07	0.04	0.11	0.2	0.14	0.27	-0.13	15.63	(0,0):612,(0,1):43,(1,0):13,(1,1):282	0:36,1:302	(0,0):405,(0,1):28,(1,0):29,(1,1):211	0:84,1:184	chr17	ENST00000397498.4	ARL16	RI	CDS	NA	diff
chr17:79649473:79649705:-@chr17:79649064:79649179:-	0.1	0.06	0.16	0.32	0.22	0.44	-0.22	752.54	(0,0):423,(1,0):15,(1,1):153	0:35,1:133	(0,0):266,(1,0):41,(1,1):124	0:92,1:73	chr17	ENST00000397498.4	ARL16	RI	CDS	ConservedRegion,AluY	diff
chr17:7481145:7481238:+@chr17:7481488:7481562:+	0.34	0.28	0.4	0.52	0.45	0.6	-0.18	473.58	(0,0):5539,(1,0):245,(1,1):278	0:342,1:181	(0,0):6427,(1,0):448,(1,1):330	0:626,1:152	chr17	ENST00000293831.8	EIF4A1	RI	CDS	ConservedRegion,GY-BOX	diff
chr17:7481145:7481234:+@chr17:7481488:7481562:+	0.32	0.27	0.38	0.49	0.42	0.56	-0.17	189.66	(0,0):5539,(1,0):245,(1,1):278	0:345,1:178	(0,0):6427,(1,0):448,(1,1):330	0:625,1:153	chr17	ENST00000293831.8	EIF4A1	RI	CDS	ConservedRegion,GY-BOX	diff
chr17:7481145:7481238:+@chr17:7481483:7481562:+	0.07	0.06	0.09	0.22	0.19	0.26	-0.15	1.8654e+47	(0,0):5539,(1,0):78,(1,1):445	0:111,1:412	(0,0):6427,(1,0):271,(1,1):507	0:395,1:383	chr17	ENST00000293831.8	EIF4A1	RI	CDS	ConservedRegion,GY-BOX	diff
chr12:123461418:123461510:+@chr12:123462872:123463116:+	0.08	0.05	0.12	0.24	0.16	0.36	-0.16	256.29	(0,0):92,(1,0):25,(1,1):65	0:29,1:61	(0,0):77,(0,1):1,(1,0):49,(1,1):39	0:57,1:32	chr12	ENST00000542678.1	ABCB9	RI	CDS	K-BOX,MIR3,IRES,uORF,MIR,LTR33	diff
chr12:123461418:123461517:+@chr12:123462907:123463116:+	0.06	0.04	0.09	0.17	0.11	0.25	-0.11	35.34	(0,0):80,(0,1):12,(1,0):25,(1,1):65	0:27,1:75	(0,0):73,(0,1):5,(1,0):46,(1,1):42	0:51,1:42	chr12	ENST00000542678.1	ABCB9	RI	CDS	K-BOX,MIR3,IRES,uORF,MIR,LTR33	diff
chr12:98987474:98987522:+@chr12:98987753:98987913:+	0.87	0.7	1	0.58	0.48	0.7	0.29	6.4	(0,0):410,(1,0):212,(1,1):142	0:303,1:51	(0,0):596,(1,0):209,(1,1):216	0:312,1:113	chr12	ENST00000401722.3	SLC25A3	RI	UTR5	ConservedRegion	diff
chr16:30012533:30012851:+@chr16:30015876:30015978:+	0.27	0.21	0.33	0.49	0.39	0.62	-0.22	363.44	(0,0):301,(1,0):233,(1,1):103	0:261,1:75	(0,0):235,(1,0):369,(1,1):89	0:416,1:42	chr16	ENST00000563197.1	INO80E	RI	CDS	L2,L2b,ConservedRegion,MIR3,UNR-bs	diff
chr16:30012533:30012851:+@chr16:30015889:30015978:+	0.24	0.19	0.3	0.41	0.33	0.5	-0.17	73.23	(0,0):297,(0,1):4,(1,0):233,(1,1):103	0:256,1:84	(0,0):227,(0,1):8,(1,0):370,(1,1):88	0:412,1:54	chr16	ENST00000563197.1	INO80E	RI	CDS	L2,L2b,ConservedRegion,MIR3,UNR-bs	diff
chr1:12089280:12089338:+@chr1:12089822:12089951:+	0.05	0.02	0.09	0.17	0.11	0.24	-0.12	14.61	(0,0):68,(0,1):24,(1,0):9,(1,1):19	0:10,1:42	(0,0):98,(0,1):23,(1,0):37,(1,1):21	0:40,1:41	chr1	ENST00000235332.4	MIIP	RI	CDS	NA	diff
chr1:26611955:26612032:-@chr1:26610853:26610973:-	0.14	0.1	0.19	0.34	0.27	0.43	-0.2	26753.3	(0,0):79,(0,1):32,(1,0):71,(1,1):26	0:74,1:55	(0,0):85,(0,1):24,(1,0):184,(1,1):29	0:196,1:41	chr1	ENST00000314675.7	UBXN11	RI	CDS	ConservedRegion,MIR3	diff
chr1:53372191:53372283:-@chr1:53370706:53370762:-	0.1	0.07	0.15	0.31	0.23	0.4	-0.21	92287.5	(0,0):116,(0,1):17,(1,0):47,(1,1):6	0:47,1:23	(0,0):117,(0,1):24,(1,0):235,(1,1):6	0:236,1:29	chr1	ENST00000371522.4	ECHDC2	RI	CDS	GY-BOX	diff
chr11:62567849:62567958:-@chr11:62566011:62566047:-	0.31	0.21	0.42	0.16	0.13	0.2	0.15	7.72	(0,0):73,(0,1):10,(1,0):228,(1,1):17	0:234,1:21	(0,0):227,(0,1):48,(1,0):382,(1,1):37	0:392,1:75	chr11	ENST00000294172.2	NXF1	RI	CDS	SF2,hsa-miR-9,K-BOX,T-rich,ConservedRegion,uORF,GY-BOX	diff
chr11:94229770:94230117:+@chr11:94231237:94232749:+	0.06	0.02	0.11	0.2	0.15	0.26	-0.14	919.55	(0,0):6,(0,1):8,(1,0):7,(1,1):208	0:12,1:211	(0,0):22,(0,1):23,(1,0):60,(1,1):404	0:148,1:339	chr11	ENST00000544612.1	ANKRD49	RI	CDS	K-BOX,ConservedRegion,MIRb,MIRc	diff
chr11:94229770:94230222:+@chr11:94231237:94232749:+	0.07	0.03	0.13	0.23	0.17	0.31	-0.16	28.27	(0,0):14,(1,0):6,(1,1):209	0:26,1:189	(0,0):45,(1,0):50,(1,1):414	0:156,1:308	chr11	ENST00000544612.1	ANKRD49	RI	CDS	K-BOX,ConservedRegion,MIRb,MIRc	diff
chr11:94229770:94230243:+@chr11:94231237:94232749:+	0.05	0.02	0.1	0.21	0.15	0.28	-0.16	198.65	(0,0):14,(1,0):5,(1,1):210	0:17,1:198	(0,0):44,(0,1):1,(1,0):45,(1,1):419	0:150,1:315	chr11	ENST00000544612.1	ANKRD49	RI	CDS	K-BOX,ConservedRegion,MIRb,MIRc	diff
chr11:94229770:94230284:+@chr11:94231237:94232749:+	0.04	0.01	0.08	0.18	0.12	0.25	-0.14	582.3	(0,0):14,(1,0):3,(1,1):212	0:19,1:196	(0,0):43,(0,1):2,(1,0):37,(1,1):427	0:111,1:355	chr11	ENST00000544612.1	ANKRD49	RI	CDS	K-BOX,ConservedRegion,MIRb	diff
chr6:43487444:43487576:+@chr6:43487807:43487923:+	0.11	0.06	0.17	0.27	0.2	0.35	-0.16	12.19	(0,0):308,(0,1):1,(1,0):18,(1,1):138	0:29,1:128	(0,0):389,(0,1):1,(1,0):58,(1,1):166	0:88,1:137	chr6	ENST00000372389.3	POLR1C	RI	CDS	MIRb	diff
chr6:43487444:43487647:+@chr6:43487807:43487923:+	0.11	0.05	0.2	0.38	0.26	0.51	-0.27	240.29	(0,0):309,(1,0):9,(1,1):147	0:31,1:125	(0,0):390,(1,0):42,(1,1):182	0:109,1:115	chr6	ENST00000372389.3	POLR1C	RI	CDS	MIRb	diff
chr19:1878663:1880114:-@chr19:1877507:1877686:-	0.2	0.16	0.24	0.4	0.34	0.46	-0.2	4.36071e+06	(0,0):734,(1,0):104,(1,1):856	0:285,1:675	(0,0):560,(1,0):186,(1,1):744	0:477,1:453	chr19	ENST00000292577.7	FAM108A1	RI	CDS	NA	diff
chr5:176942686:176942822:-@chr5:176942187:176942340:-	0.1	0.05	0.18	0.28	0.19	0.4	-0.18	6.05	(0,0):379,(1,0):12,(1,1):78	0:18,1:72	(0,0):336,(1,0):34,(1,1):81	0:65,1:50	chr5	ENST00000330503.7	DDX41	RI	CDS	ConservedRegion,MIR3,uORF,MIRb	diff
chr2:27885042:27885148:-@chr2:27883851:27884468:-	0.08	0.05	0.12	0.21	0.17	0.25	-0.13	2443.65	(0,0):168,(1,0):26,(1,1):377	0:58,1:345	(0,0):234,(1,0):107,(1,1):578	0:225,1:460	chr2	ENST00000337768.5	SUPT7L	RI	CDS	NA	diff
chr2:27885046:27885148:-@chr2:27883851:27884310:-	0.06	0.04	0.09	0.17	0.14	0.2	-0.11	4.27357e+13	(0,0):168,(1,0):35,(1,1):368	0:48,1:355	(0,0):234,(1,0):137,(1,1):548	0:218,1:467	chr2	ENST00000337768.5	SUPT7L	RI	CDS	NA	diff
chr2:27885046:27885148:-@chr2:27883851:27884468:-	0.08	0.05	0.11	0.21	0.17	0.25	-0.13	956597	(0,0):163,(0,1):5,(1,0):26,(1,1):377	0:60,1:348	(0,0):229,(0,1):5,(1,0):107,(1,1):578	0:193,1:497	chr2	ENST00000337768.5	SUPT7L	RI	CDS	NA	diff
chr9:140513415:140513501:+@chr9:140605419:140605482:+@chr9:140611078:140611634:+	0.44	0.28	0.6	0.84	0.72	0.93	-0.4	3231.97	(0,0):55,(0,1):9,(1,0):18,(1,1):222	0:115,1:134	(0,0):166,(0,1):5,(1,0):98,(1,1):669	0:599,1:173	chr9	ENST00000462484.1	EHMT1	SE	CDS	NA	diff
chr9:94830248:94830380:-@chr9:94841716:94841848:-@chr9:94842298:94842370:-	0.42	0.26	0.57	0.08	0.04	0.12	0.34	40945.4	(0,0):65,(0,1):12,(1,0):21,(1,1):10	0:24,1:19	(0,0):323,(0,1):52,(1,0):12,(1,1):58	0:18,1:104	chr9	ENST00000486910.1	SPTLC1	SE	CDS	NA	diff
chr11:6503275:6503519:+@chr11:6518815:6520191:+@chr11:6523983:6525430:+	0.16	0.09	0.25	0.62	0.47	0.79	-0.46	5.16843e+12	(0,0):1062,(1,0):17,(1,1):135	0:53,1:99	(0,0):1317,(1,0):85,(1,1):164	0:155,1:94	chr11	ENST00000473019.1	DNHD1	SE	UTR5	ConservedRegion,uORF,IRES	diff
chr11:82868030:82868673:+@chr11:82872369:82872494:+@chr11:82874721:82874909:+	0.55	0.24	0.87	0.96	0.88	0.99	-0.41	5.81	(0,0):139,(1,0):4,(1,1):46	0:32,1:18	(0,0):237,(1,0):65,(1,1):167	0:228,1:4	chr11	ENST00000298281.4	PCF11	SE	CDS	NA	diff
chr11:64081711:64081839:+@chr11:64082473:64082742:+@chr11:64083179:64084406:+	0.44	0.36	0.53	0.75	0.62	0.91	-0.31	725.54	(0,0):1030,(1,0):123,(1,1):1340	0:716,1:747	(0,0):633,(1,0):128,(1,1):817	0:712,1:233	chr11	ENST00000406310.1	ESRRA	SE	CDS	ConservedRegion	diff
chr8:144672778:144672908:-@chr8:144674885:144675063:-@chr8:144679518:144679845:-	0.37	0.16	0.72	0.86	0.68	0.99	-0.49	12.03	(0,0):682,(0,1):3,(1,0):8,(1,1):38	0:17,1:32	(0,0):1480,(0,1):1,(1,0):23,(1,1):18	0:39,1:3	chr8	ENST00000526838.1	EEF1D	SE	UTR5	IRES	diff
chr8:144672778:144672908:-@chr8:144674885:144675112:-@chr8:144679518:144679845:-	0.38	0.18	0.66	0.89	0.75	0.98	-0.51	16.08	(0,0):680,(0,1):3,(1,0):10,(1,1):38	0:20,1:31	(0,0):1469,(0,1):1,(1,0):34,(1,1):18	0:44,1:9	chr8	ENST00000526838.1	EEF1D	SE	UTR5	IRES	diff
chr8:144672778:144672908:-@chr8:144674817:144675112:-@chr8:144679518:144679845:-	0.48	0.28	0.71	0.91	0.77	0.98	-0.43	335.09	(0,0):673,(0,1):3,(1,0):17,(1,1):38	0:38,1:20	(0,0):1458,(0,1):1,(1,0):45,(1,1):18	0:63,1:1	chr8	ENST00000526838.1	EEF1D	SE	UTR5	IRES	diff
chr8:144672778:144672908:-@chr8:144674817:144675063:-@chr8:144679518:144679845:-	0.48	0.26	0.74	0.89	0.71	0.98	-0.41	6.16	(0,0):675,(0,1):3,(1,0):15,(1,1):38	0:33,1:23	(0,0):1469,(0,1):1,(1,0):34,(1,1):18	0:52,1:1	chr8	ENST00000526838.1	EEF1D	SE	UTR5	IRES	diff
chr8:125528128:125528271:-@chr8:125531059:125531122:-@chr8:125551266:125551705:-	0.18	0.1	0.29	0.52	0.34	0.7	-0.34	70.88	(0,0):524,(1,0):12,(1,1):581	0:85,1:508	(0,0):459,(1,0):26,(1,1):420	0:209,1:237	chr8	ENST00000276692.6	TATDN1	SE	CDS	NA	diff
chr22:29945041:29945147:-@chr22:29946717:29946832:-@chr22:29949660:29950444:-	0.87	0.79	0.93	0.55	0.44	0.66	0.32	5.09742e+06	(0,0):82,(0,1):9,(1,0):79,(1,1):31	0:103,1:16	(0,0):126,(0,1):29,(1,0):45,(1,1):62	0:73,1:63	chr22	ENST00000490103.1	THOC5	SE	UTR5	IRES	diff
chr22:29945041:29945147:-@chr22:29946717:29946824:-@chr22:29949660:29950444:-	0.85	0.74	0.93	0.52	0.41	0.64	0.33	50322.7	(0,0):98,(0,1):9,(1,0):63,(1,1):31	0:92,1:11	(0,0):132,(0,1):29,(1,0):39,(1,1):62	0:62,1:68	chr22	ENST00000490103.1	THOC5	SE	UTR5	IRES	diff
chr12:112563316:112563422:+@chr12:112563889:112563953:+@chr12:112568315:112568373:+	0.55	0.39	0.72	0.18	0.12	0.25	0.37	52268.3	(0,0):107,(0,1):11,(1,0):24,(1,1):3	0:26,1:12	(0,0):195,(0,1):58,(1,0):21,(1,1):3	0:22,1:60	chr12	ENST00000412615.2	TRAFD1	SE	UTR5	IRES	diff
chr12:108955240:108956512:+@chr12:108957836:108957931:+@chr12:108958055:108958168:+	0.14	0.06	0.23	0.5	0.37	0.63	-0.36	398954	(0,0):222,(0,1):53,(1,0):9,(1,1):77	0:22,1:117	(0,0):179,(0,1):24,(1,0):28,(1,1):60	0:51,1:61	chr12	ENST00000545932.1	ISCU	SE	CDS	NA	diff
chr12:102547647:102547754:+@chr12:102548605:102548774:+@chr12:102558216:102558694:+	0.56	0.28	0.84	0.1	0.04	0.17	0.46	241.25	(0,0):80,(0,1):4,(1,0):9,(1,1):10	0:12,1:11	(0,0):181,(0,1):43,(1,0):7,(1,1):61	0:11,1:100	chr12	ENST00000327680.2	PARPBP	SE	CDS	NA	diff
chr2:207014504:207014649:-@chr2:207017143:207017234:-@chr2:207018342:207018406:-	0.4	0.23	0.6	0.8	0.73	0.86	-0.4	12272.3	(0,0):36,(0,1):12,(1,0):16,(1,1):15	0:24,1:19	(0,0):191,(0,1):26,(1,0):203,(1,1):60	0:256,1:33	chr2	ENST00000233190.5	NDUFS1	SE	CDS	NA	diff
chrX:53441930:53442118:-@chrX:53448845:53448990:-@chrX:53449441:53449677:-	0.55	0.4	0.72	0.13	0.11	0.16	0.42	4.59668e+10	(0,0):82,(0,1):9,(1,0):31,(1,1):65	0:65,1:40	(0,0):493,(0,1):226,(1,0):85,(1,1):696	0:177,1:830	chrX	ENST00000322213.4	SMC1A	SE	CDS	NA	diff
chrX:48432873:48433671:+@chrX:48434203:48434471:+@chrX:48434702:48434807:+	0.47	0.37	0.58	0.78	0.63	0.91	-0.31	34.45	(0,0):2271,(0,1):6,(1,0):79,(1,1):488	0:262,1:311	(0,0):2088,(0,1):1,(1,0):114,(1,1):443	0:448,1:110	chrX	ENST00000491240.1	RBM3	SE	CDS	ConservedRegion,uORF	diff
chr7:43648055:43649240:-@chr7:43670783:43671381:-@chr7:43679048:43679280:-	0.14	0.09	0.19	0.64	0.53	0.76	-0.5	4.2127e+67	(0,0):776,(0,1):6,(1,0):31,(1,1):497	0:121,1:413	(0,0):2995,(0,1):4,(1,0):154,(1,1):509	0:473,1:194	chr7	ENST00000446564.1	COA1	SE	UTR3	L1MDa	diff
chr7:43648055:43649240:-@chr7:43670611:43671381:-@chr7:43679048:43679280:-	0.12	0.09	0.17	0.62	0.52	0.72	-0.5	1.72942e+86	(0,0):772,(0,1):6,(1,0):35,(1,1):497	0:91,1:447	(0,0):2961,(0,1):4,(1,0):188,(1,1):509	0:474,1:227	chr7	ENST00000446564.1	COA1	SE	UTR3	L1MDa	diff
chr7:66204825:66205779:+@chr7:66236870:66237065:+@chr7:66240214:66240380:+	0.4	0.27	0.55	0.94	0.86	0.98	-0.54	1.69969e+24	(0,0):63,(1,0):36,(1,1):500	0:208,1:328	(0,0):177,(0,1):2,(1,0):140,(1,1):475	0:591,1:26	chr7	ENST00000510829.2	KCTD7	SE	UTR3	ConservedRegion	diff
chr7:23719746:23719902:+@chr7:23724118:23724291:+@chr7:23728888:23729078:+	0.45	0.27	0.64	0.85	0.73	0.94	-0.4	169.53	(0,0):44,(0,1):7,(1,0):20,(1,1):37	0:44,1:20	(0,0):87,(0,1):4,(1,0):73,(1,1):59	0:122,1:14	chr7	ENST00000409192.3	FAM221A	SE	CDS	NA	diff
chr19:58115645:58115774:+@chr19:58117054:58119195:+@chr19:58123871:58124087:+	0.34	0.28	0.42	0.84	0.7	0.96	-0.5	1.78957e+22	(0,0):223,(0,1):6,(1,0):298,(1,1):103	0:331,1:76	(0,0):412,(0,1):1,(1,0):481,(1,1):65	0:533,1:14	chr19	ENST00000332854.5	ZNF530	SE	UTR3	AluSq2,ConservedRegion	diff
chr15:100255024:100258027:-@chr15:100260989:100261171:-@chr15:100273550:100273770:-	0.88	0.67	0.99	0.43	0.26	0.6	0.45	93.8	(0,0):625,(1,0):14,(1,1):200	0:210,1:4	(0,0):803,(0,1):1,(1,0):22,(1,1):855	0:327,1:551	chr15	ENST00000496108.1	LYSMD4	SE	UTR3	L2	diff
chr3:49044637:49044964:+@chr3:49048854:49049030:+@chr3:49049455:49050132:+	0.6	0.3	0.89	0.14	0.09	0.2	0.46	72.54	(0,0):157,(1,0):15,(1,1):135	0:97,1:53	(0,0):891,(1,0):23,(1,1):899	0:170,1:752	chr3	ENST00000395474.3	WDR6	SE	CDS	NA	diff
chr3:15089009:15094140:-@chr3:15094798:15094974:-@chr3:15106568:15106841:-	0.73	0.51	0.92	0.43	0.3	0.58	0.3	5.6	(0,0):520,(1,0):30,(1,1):1141	0:1022,1:149	(0,0):685,(0,1):1,(1,0):31,(1,1):2128	0:1050,1:1110	chr3	ENST00000253686.2	MRPS25	SE	CDS	SF2,SF2SAN_204	diff
chr3:49044637:49044964:+@chr3:49048854:49049174:+@chr3:49049455:49050132:+	0.74	0.52	0.93	0.4	0.33	0.47	0.34	39.59	(0,0):138,(1,0):34,(1,1):135	0:153,1:16	(0,0):793,(1,0):121,(1,1):899	0:445,1:575	chr3	ENST00000395474.3	WDR6	SE	CDS	NA	diff
chr3:20212531:20212724:-@chr3:20215741:20216547:-@chr3:20218093:20218151:-	0.21	0.14	0.3	0.69	0.57	0.8	-0.48	1.47608e+27	(0,0):46,(0,1):9,(1,0):46,(1,1):37	0:57,1:35	(0,0):136,(0,1):8,(1,0):321,(1,1):73	0:370,1:32	chr3	ENST00000306698.2	SGOL1	SE	CDS	NA	diff
chr3:49044637:49044964:+@chr3:49048854:49049067:+@chr3:49049455:49050132:+	0.6	0.36	0.96	0.15	0.1	0.21	0.45	489.86	(0,0):154,(1,0):18,(1,1):135	0:74,1:79	(0,0):884,(1,0):30,(1,1):899	0:171,1:758	chr3	ENST00000395474.3	WDR6	SE	CDS	NA	diff
chr3:49711795:49712054:+@chr3:49712616:49712746:+@chr3:49713127:49713220:+	0.56	0.41	0.71	0.9	0.84	0.96	-0.34	3468.48	(0,0):96,(0,1):14,(1,0):30,(1,1):19	0:37,1:26	(0,0):263,(0,1):7,(1,0):127,(1,1):41	0:165,1:10	chr3	ENST00000296456.5	APEH	SE	CDS	NA	diff
chr1:23664628:23665101:-@chr1:23667345:23667510:-@chr1:23670704:23671142:-	0.25	0.19	0.32	0.63	0.59	0.67	-0.38	6.40474e+97	(0,0):188,(0,1):100,(1,0):47,(1,1):129	0:82,1:194	(0,0):485,(0,1):181,(1,0):401,(1,1):276	0:591,1:267	chr1	ENST00000478691.1	HNRNPR	SE	UTR5	IRES	diff
chr1:173833039:173833442:-@chr1:173833622:173833842:-@chr1:173834648:173834685:-	0.06	0.03	0.13	0.42	0.29	0.58	-0.36	1.76242e+08	(0,0):728,(0,1):2,(1,0):5,(1,1):149	0:16,1:140	(0,0):741,(1,0):41,(1,1):167	0:103,1:105	chr1	ENST00000450589.1	GAS5	SE	UTR3	NA	diff
chr1:182823165:182823313:+@chr1:182824712:182824848:+@chr1:182825667:182825713:+	0.51	0.37	0.67	0.16	0.13	0.19	0.35	1.82749e+09	(0,0):50,(0,1):10,(1,0):37,(1,1):27	0:49,1:25	(0,0):564,(0,1):140,(1,0):94,(1,1):237	0:138,1:333	chr1	ENST00000367549.3	DHX9	SE	CDS	IRES	diff
chr1:19570444:19570509:-@chr1:19571233:19571524:-@chr1:19577909:19578290:-	0.25	0.14	0.37	0.92	0.85	0.97	-0.67	1.15258e+103	(0,0):67,(0,1):4,(1,0):19,(1,1):95	0:44,1:74	(0,0):236,(0,1):3,(1,0):163,(1,1):114	0:261,1:19	chr1	ENST00000477853.1	EMC1	SE	CDS	NA	diff
chr1:113217308:113217671:+@chr1:113229588:113229728:+@chr1:113231557:113231760:+	0.65	0.44	0.84	0.14	0.08	0.22	0.51	1.2092e+09	(0,0):43,(0,1):5,(1,0):19,(1,1):38	0:44,1:18	(0,0):121,(0,1):47,(1,0):16,(1,1):194	0:40,1:217	chr1	ENST00000413052.2	MOV10	SE	CDS	NA	diff
chr1:23664628:23665101:-@chr1:23667345:23667513:-@chr1:23670704:23671142:-	0.25	0.19	0.32	0.62	0.58	0.66	-0.37	1.70245e+77	(0,0):189,(0,1):100,(1,0):46,(1,1):129	0:74,1:201	(0,0):497,(0,1):181,(1,0):389,(1,1):276	0:558,1:288	chr1	ENST00000478691.1	HNRNPR	SE	UTR5	IRES	diff
chr1:111492473:111492745:-@chr1:111493910:111495437:-@chr1:111506243:111507636:-	0.36	0.24	0.48	0.8	0.74	0.86	-0.44	1.1761e+17	(0,0):25,(0,1):8,(1,0):29,(1,1):60	0:46,1:51	(0,0):59,(0,1):24,(1,0):372,(1,1):230	0:543,1:83	chr1	ENST00000440689.1	RP11-96K19.2	SE	CDS	uORF	diff
chr14:35591760:35592116:+@chr14:35592711:35592962:+@chr14:35595941:35595988:+	0.48	0.3	0.69	0.94	0.82	1	-0.46	882.36	(0,0):123,(0,1):4,(1,0):17,(1,1):30	0:27,1:24	(0,0):378,(1,0):61,(1,1):38	0.06875	chr14	ENST00000554896.1	RP11-173D9.3	SE	CDS	ConservedRegion,uORF	diff
chr16:70582273:70582345:+@chr16:70584553:70584581:+@chr16:70588349:70588500:+	0.39	0.29	0.51	0.08	0.06	0.11	0.31	1.64731e+18	(0,0):152,(0,1):35,(1,0):30,(1,1):43	0:49,1:59	(0,0):742,(0,1):322,(1,0):37,(1,1):287	0:64,1:582	chr16	ENST00000302516.5	SF3B3	SE	CDS	NA	diff
chr16:29455719:29455820:-@chr16:29458123:29458243:-@chr16:29465337:29465532:-	0.62	0.48	0.77	0.96	0.89	1	-0.34	18143.5	(0,0):1853,(0,1):1,(1,0):91,(1,1):263	0:252,1:103	(0,0):1077,(1,0):128,(1,1):158	0:270,1:16	chr16	ENST00000565417.1	RP11-345J4.5	SE	UTR5	NA	diff
chr16:89862314:89862426:-@chr16:89865359:89865487:-@chr16:89865574:89865640:-	0.57	0.39	0.72	0.12	0.08	0.17	0.45	1.23803e+13	(0,0):262,(0,1):8,(1,0):26,(1,1):1	0:27,1:8	(0,0):276,(0,1):58,(1,0):23,(1,1):42	0:30,1:93	chr16	ENST00000389301.3	FANCA	SE	CDS	NA	diff
chr16:29455719:29455820:-@chr16:29458123:29458347:-@chr16:29465337:29465532:-	0.57	0.47	0.69	0.96	0.87	0.99	-0.39	2.76085e+12	(0,0):1794,(0,1):1,(1,0):150,(1,1):263	0:293,1:121	(0,0):1003,(1,0):202,(1,1):158	0.25	chr16	ENST00000565417.1	RP11-345J4.5	SE	UTR5	NA	diff
chr21:27107284:27107889:+@chr21:27113872:27113986:+@chr21:27117521:27117665:+	0.31	0.23	0.42	0.96	0.88	1	-0.65	7.29455e+95	(0,0):479,(1,0):42,(1,1):822	0:310,1:554	(0,0):792,(1,0):173,(1,1):874	0:1046,1:1	chr21	ENST00000354828.3	GABPA	SE	UTR5	NA	diff
chr21:27107284:27107889:+@chr21:27113884:27113986:+@chr21:27117521:27117665:+	0.43	0.31	0.56	0.98	0.95	1	-0.55	5.06444e+65	(0,0):468,(1,0):53,(1,1):822	0:393,1:482	(0,0):757,(1,0):208,(1,1):874	0:1065,1:17	chr21	ENST00000354828.3	GABPA	SE	UTR5	NA	diff
chr21:44313378:44313491:+@chr21:44323292:44324386:+@chr21:44328974:44329786:+	0.42	0.37	0.47	0.94	0.89	0.97	-0.52	1000000000000	(0,0):1186,(0,1):7,(1,0):434,(1,1):787	0:761,1:467	(0,0):984,(0,1):4,(1,0):902,(1,1):605	0:1454,1:57	chr21	ENST00000460259.1	NDUFV3	SE	CDS	SF2	diff
chr10:92982446:92982740:+@chr10:93000241:93000337:+@chr10:93008262:93008317:+	0.53	0.34	0.73	0.9	0.79	0.98	-0.37	147.72	(0,0):224,(1,0):22,(1,1):126	0:79,1:69	(0,0):399,(0,1):1,(1,0):114,(1,1):293	0:364,1:44	chr10	ENST00000543648.1	PCGF5	SE	CDS	NA	diff
chr10:99240652:99240799:-@chr10:99243860:99243908:-@chr10:99258030:99258366:-	0.54	0.33	0.78	0.92	0.83	0.97	-0.38	50.2	(0,0):21,(0,1):6,(1,0):9,(1,1):13	0:17,1:11	(0,0):64,(0,1):3,(1,0):54,(1,1):29	0:80,1:6	chr10	ENST00000438925.2	MMS19	SE	CDS	NA	diff
chr4:13621567:13621691:-@chr4:13625014:13627936:-@chr4:13628969:13629347:-	0.66	0.38	0.89	0.09	0.05	0.15	0.57	5122.09	(0,0):1,(0,1):1,(1,0):40,(1,1):6	0:46,1:1	(0,0):27,(0,1):17,(1,0):22,(1,1):18	0:22,1:35	chr4	ENST00000040738.5	BOD1L1	SE	CDS	NA	diff
chr6:637701:637861:-@chr6:689139:689212:-@chr6:693019:693168:-	0.54	0.36	0.75	0.15	0.1	0.22	0.39	190.47	(0,0):134,(0,1):8,(1,0):16,(1,1):22	0:26,1:20	(0,0):237,(0,1):66,(1,0):22,(1,1):143	0:44,1:187	chr6	ENST00000230449.4	EXOC2	SE	UTR5	SF2,uORF,IRES	diff
chr6:37446776:37446968:-@chr6:37449037:37449253:-@chr6:37450966:37451065:-	0.53	0.38	0.7	0.98	0.91	1	-0.45	1.95007e+09	(0,0):1600,(1,0):55,(1,1):108	0:110,1:53	(0,0):1951,(1,0):138,(1,1):52	0.131944	chr6	ENST00000373451.4	FTSJD2	SE	UTR5	SF2,ConservedRegion	diff
chr5:118792010:118792063:+@chr5:118807331:118807395:+@chr5:118809603:118809710:+	0.35	0.19	0.53	0.06	0.03	0.09	0.29	248.34	(0,0):36,(0,1):9,(1,0):10,(1,1):7	0:14,1:12	(0,0):311,(0,1):115,(1,0):15,(1,1):104	0:22,1:212	chr5	ENST00000256216.6	HSD17B4	SE	CDS	NA	diff
chr5:132342451:132342612:-@chr5:132358503:132358598:-@chr5:132362189:132362296:-	0.5	0.37	0.66	0.27	0.18	0.37	0.23	5.05	(0,0):146,(0,1):18,(1,0):34,(1,1):38	0:49,1:41	(0,0):132,(0,1):36,(1,0):29,(1,1):69	0:56,1:78	chr5	ENST00000324170.3	ZCCHC10	SE	CDS	NA	diff
chr5:60186373:60186913:-@chr5:60187864:60189470:-@chr5:60194103:60194227:-	0.13	0.08	0.19	0.35	0.27	0.46	-0.22	1951.72	(0,0):63,(0,1):18,(1,0):28,(1,1):57	0:32,1:71	(0,0):126,(0,1):14,(1,0):92,(1,1):68	0:115,1:59	chr5	ENST00000381118.3	ERCC8	SE	CDS	NA	diff
chr11:31455007:31455117:-@chr11:31477807:31477933:-@chr11:31531066:31531192:-	0.18	0.11	0.25	0.46	0.29	0.62	-0.28	13.71	(0,0):303,(0,1):43,(1,0):20,(1,1):36	0:26,1:73	(0,0):925,(0,1):8,(1,0):22,(1,1):29	0:45,1:14	chr11	ENST00000532287.1	IMMP1L	SE	CDS	NA	diff
chr11:66383908:66384528:+@chr11:66391685:66392418:+@chr11:66407171:66408663:+	0.69	0.63	0.76	0.96	0.94	0.98	-0.27	6.00956e+56	(0,0):1429,(0,1):17,(1,0):368,(1,1):1262	0:1259,1:388	(0,0):3606,(0,1):17,(1,0):1414,(1,1):2343	0:3682,1:92	chr11	ENST00000310137.4	RBM14	SE	CDS	SF2,ConservedRegion	diff
chr11:66432470:66433049:-@chr11:66436086:66436762:-@chr11:66444139:66445234:-	0.63	0.51	0.76	0.88	0.78	0.95	-0.25	36.36	(0,0):236,(0,1):5,(1,0):112,(1,1):374	0:378,1:113	(0,0):443,(0,1):1,(1,0):253,(1,1):650	0:772,1:132	chr11	ENST00000525754.1	RBM4B	SE	UTR3	NA	diff
chr11:125462691:125462813:+@chr11:125465776:125465898:+@chr11:125466954:125467014:+	0.88	0.77	0.96	0.99	0.97	1	-0.11	7.18	(0,0):40,(0,1):3,(1,0):60,(1,1):2	0:62,1:3	(0,0):155,(0,1):1,(1,0):423,(1,1):4	0:427,1:1	chr11	ENST00000392708.3	STT3A	SE	UTR5	ConservedRegion	diff
chr11:502062:502249:-@chr11:504824:504996:-@chr11:507113:507300:-	0.82	0.75	0.89	0.59	0.52	0.65	0.23	816.4	(0,0):442,(0,1):20,(1,0):249,(1,1):209	0:418,1:60	(0,0):532,(0,1):53,(1,0):222,(1,1):306	0:394,1:187	chr11	ENST00000397615.2	RNH1	SE	UTR5	NA	diff
chr11:111953407:111956186:-@chr11:111956702:111957034:-@chr11:111957364:111957774:-	0.14	0.12	0.16	0.29	0.26	0.32	-0.15	4.84167e+46	(0,0):248,(0,1):601,(1,0):149,(1,1):2968	0:560,1:3158	(0,0):258,(0,1):335,(1,0):230,(1,1):2609	0:916,1:2258	chr11	ENST00000504148.2	TIMM8B	SE	CDS	NA	diff
chr11:502062:502249:-@chr11:504824:505001:-@chr11:507113:507300:-	0.8	0.73	0.86	0.55	0.49	0.62	0.25	2.03376e+12	(0,0):459,(0,1):20,(1,0):232,(1,1):209	0:397,1:64	(0,0):552,(0,1):53,(1,0):202,(1,1):306	0:362,1:199	chr11	ENST00000397615.2	RNH1	SE	UTR5	NA	diff
chr8:144668899:144669019:-@chr8:144671478:144672251:-@chr8:144679518:144679845:-	0.12	0.09	0.14	0.26	0.22	0.31	-0.14	4.97124e+16	(0,0):1231,(0,1):25,(1,0):95,(1,1):357	0:137,1:340	(0,0):2457,(0,1):18,(1,0):221,(1,1):378	0:328,1:289	chr8	ENST00000532741.1	EEF1D	SE	CDS	ConservedRegion,uORF,IRES	diff
chr22:30806585:30806668:+@chr22:30812223:30812392:+@chr22:30824449:30825041:+	0.04	0.02	0.06	0.15	0.1	0.21	-0.11	17491.8	(0,0):1257,(1,0):10,(1,1):1112	0:54,1:1068	(0,0):1075,(1,0):27,(1,1):646	0:156,1:517	chr22	ENST00000312932.8	SEC14L2	SE	CDS	ConservedRegion,uORF	diff
chr12:49717387:49717535:+@chr12:49719284:49719441:+@chr12:49719530:49719667:+	0.22	0.15	0.3	0.43	0.33	0.55	-0.21	28.49	(0,0):1066,(1,0):38,(1,1):243	0:80,1:201	(0,0):830,(1,0):71,(1,1):224	0:185,1:110	chr12	ENST00000551245.1	TROAP	SE	CDS	ConservedRegion	diff
chr12:50399039:50399175:-@chr12:50400217:50400419:-@chr12:50410414:50410502:-	0.79	0.7	0.87	0.95	0.92	0.97	-0.16	781.87	(0,0):101,(0,1):12,(1,0):163,(1,1):46	0:205,1:16	(0,0):308,(0,1):10,(1,0):685,(1,1):172	0:848,1:19	chr12	ENST00000427314.2	RACGAP1	SE	CDS	NA	diff
chr2:223507570:223507724:-@chr2:223511520:223511689:-@chr2:223513459:223513514:-	0.29	0.18	0.45	0.11	0.08	0.16	0.18	22.01	(0,0):91,(0,1):11,(1,0):24,(1,1):43	0:36,1:42	(0,0):307,(0,1):72,(1,0):38,(1,1):127	0:54,1:183	chr2	ENST00000281828.6	FARSB	SE	CDS	NA	diff
chr2:219524379:219524466:+@chr2:219524760:219524889:+@chr2:219525662:219526243:+	0.7	0.58	0.82	0.41	0.32	0.51	0.29	1678.99	(0,0):325,(0,1):10,(1,0):88,(1,1):393	0:379,1:112	(0,0):362,(0,1):30,(1,0):61,(1,1):415	0:254,1:252	chr2	ENST00000359273.3	BCS1L	SE	UTR3	IRES,uORF,UNR-bs	diff
chr2:223507570:223507724:-@chr2:223511520:223511715:-@chr2:223513459:223513514:-	0.33	0.21	0.47	0.14	0.11	0.18	0.19	15.91	(0,0):83,(0,1):11,(1,0):32,(1,1):43	0:50,1:36	(0,0):291,(0,1):72,(1,0):54,(1,1):127	0:66,1:187	chr2	ENST00000281828.6	FARSB	SE	CDS	NA	diff
chrX:23801290:23801826:+@chrX:23801917:23802520:+@chrX:23803445:23803546:+	0.39	0.34	0.43	0.57	0.5	0.64	-0.18	27156.1	(0,0):931,(0,1):1,(1,0):393,(1,1):952	0:755,1:591	(0,0):1113,(1,0):481,(1,1):798	0:894,1:385	chrX	ENST00000379270.4	SAT1	SE	CDS	ConservedRegion	diff
chrX:47053196:47053423:+@chrX:47057566:47057754:+@chrX:47058202:47058318:+	0.32	0.24	0.41	0.07	0.05	0.08	0.25	9.62663e+24	(0,0):861,(0,1):42,(1,0):47,(1,1):68	0:77,1:80	(0,0):2245,(0,1):469,(1,0):79,(1,1):535	0:107,1:976	chrX	ENST00000377351.4	UBA1	SE	UTR5	uORF,IRES	diff
chr17:40714092:40714237:+@chr17:40714374:40714505:+@chr17:40714630:40716595:+	0.78	0.69	0.87	0.51	0.43	0.6	0.27	1.32525e+07	(0,0):1333,(0,1):9,(1,0):124,(1,1):1778	0:1516,1:395	(0,0):1441,(0,1):35,(1,0):104,(1,1):1940	0:1173,1:906	chr17	ENST00000421097.2	COASY	SE	UTR5	uORF,IRES	diff
chr17:41561331:41561553:+@chr17:41566817:41566902:+@chr17:41567759:41567861:+	0.74	0.57	0.88	0.94	0.87	0.98	-0.2	5.68	(0,0):6,(0,1):4,(1,0):25,(1,1):27	0:43,1:13	(0,0):42,(0,1):4,(1,0):136,(1,1):164	0:292,1:12	chr17	ENST00000540306.1	DHX8	SE	CDS	NA	diff
chr17:76967336:76968786:-@chr17:76969052:76969425:-@chr17:76970770:76971080:-	0.75	0.66	0.84	0.92	0.86	0.98	-0.17	12.59	(0,0):185,(0,1):2,(1,0):227,(1,1):1329	0:1127,1:431	(0,0):646,(1,0):937,(1,1):4622	0:5209,1:350	chr17	ENST00000262776.3	LGALS3BP	SE	CDS	MIR3	diff
chr17:16344680:16347445:-@chr17:16351159:16351274:-@chr17:16365572:16365700:-	0.14	0.09	0.19	0.33	0.24	0.43	-0.19	122.22	(0,0):1138,(1,0):26,(1,1):4934	0:854,1:4106	(0,0):955,(1,0):48,(1,1):3683	0:1109,1:2622	chr17	ENST00000409083.3	FAM211A	SE	CDS	NA	diff
chr17:20059318:20059549:+@chr17:20107646:20109225:+@chr17:20130726:20130933:+	0.6	0.48	0.72	0.84	0.77	0.9	-0.24	190.02	(0,0):44,(0,1):10,(1,0):198,(1,1):47	0:227,1:28	(0,0):98,(0,1):14,(1,0):779,(1,1):104	0:859,1:38	chr17	ENST00000395527.4	SPECC1	SE	CDS	NA	diff
chr20:34220717:34220845:-@chr20:34243124:34243266:-@chr20:34252724:34252853:-	0.41	0.25	0.59	0.69	0.61	0.77	-0.28	8.63	(0,0):1417,(0,1):11,(1,0):24,(1,1):33	0:40,1:28	(0,0):8906,(0,1):22,(1,0):148,(1,1):113	0:227,1:56	chr20	ENST00000352393.4	CPNE1	SE	UTR5	NA	diff
chr20:17937577:17937681:-@chr20:17941783:17941969:-@chr20:17949018:17949498:-	0.18	0.1	0.26	0.4	0.34	0.48	-0.22	37631.5	(0,0):410,(0,1):42,(1,0):17,(1,1):87	0:33,1:113	(0,0):1114,(0,1):81,(1,0):103,(1,1):188	0:177,1:195	chr20	ENST00000377768.3	SNX5	SE	CDS	uORF	diff
chr20:10389272:10389451:-@chr20:10393178:10394579:-@chr20:10401176:10401406:-	0.36	0.32	0.41	0.49	0.43	0.56	-0.13	19.48	(0,0):155,(0,1):7,(1,0):646,(1,1):419	0:810,1:262	(0,0):166,(0,1):7,(1,0):727,(1,1):341	0:890,1:185	chr20	ENST00000399054.2	MKKS	SE	UTR3	ConservedRegion,uORF	diff
chr20:21283922:21284111:+@chr20:21306917:21307044:+@chr20:21307128:21307239:+	0.73	0.58	0.88	0.99	0.97	1	-0.26	75.69	(0,0):33,(0,1):7,(1,0):45,(1,1):34	0:64,1:22	(0,0):176,(0,1):2,(1,0):499,(1,1):191	0:688,1:4	chr20	ENST00000377191.3	XRN2	SE	CDS	NA	diff
chr7:100860949:100861498:+@chr7:100861600:100865077:+@chr7:100865885:100866055:+	0.08	0.07	0.1	0.19	0.15	0.23	-0.11	3.9759e+08	(0,0):305,(0,1):25,(1,0):128,(1,1):265	0:144,1:274	(0,0):205,(0,1):27,(1,0):172,(1,1):136	0:194,1:141	chr7	ENST00000305105.2	ZNHIT1	SE	CDS	SF2,uORF,FRAM	diff
chr7:43670611:43671381:-@chr7:43671824:43673007:-@chr7:43679048:43679280:-	0.07	0.05	0.1	0.34	0.29	0.39	-0.27	3.11805e+83	(0,0):398,(0,1):4,(1,0):37,(1,1):418	0:67,1:392	(0,0):652,(0,1):4,(1,0):238,(1,1):544	0:451,1:335	chr7	ENST00000446564.1	COA1	SE	UTR3	Tigger1	diff
chr19:1271980:1272050:+@chr19:1273493:1273714:+@chr19:1274306:1275032:+	0.2	0.13	0.29	0.42	0.31	0.54	-0.22	8.57	(0,0):1512,(0,1):40,(1,0):20,(1,1):122	0:35,1:147	(0,0):1537,(0,1):19,(1,0):39,(1,1):173	0:94,1:137	chr19	ENST00000593093.1	CIRBP	SE	UTR3	ConservedRegion	diff
chr19:39330736:39331199:-@chr19:39332253:39332322:-@chr19:39334482:39334554:-	0.45	0.4	0.5	0.24	0.22	0.27	0.21	4.65462e+38	(0,0):1375,(0,1):188,(1,0):199,(1,1):340	0:338,1:389	(0,0):3142,(0,1):568,(1,0):239,(1,1):873	0:477,1:1203	chr19	ENST00000221419.4	HNRNPL	SE	CDS	NA	diff
chr15:85234766:85234875:-@chr15:85257962:85258097:-@chr15:85259256:85259946:-	0.15	0.12	0.19	0.3	0.26	0.34	-0.15	2.33687e+11	(0,0):348,(0,1):332,(1,0):82,(1,1):399	0:135,1:678	(0,0):359,(0,1):268,(1,0):158,(1,1):421	0:280,1:567	chr15	ENST00000268220.7	SEC11A	SE	CDS	NA	diff
chr15:91527136:91527370:-@chr15:91527923:91528055:-@chr15:91537637:91537880:-	0.83	0.76	0.89	0.94	0.92	0.96	-0.11	52.34	(0,0):64,(0,1):20,(1,0):159,(1,1):75	0:224,1:30	(0,0):409,(0,1):41,(1,0):1011,(1,1):454	0:1448,1:58	chr15	ENST00000394249.3	PRC1	SE	CDS	NA	diff
chr3:52232103:52232271:+@chr3:52232688:52232864:+@chr3:52233226:52233456:+	0.65	0.52	0.77	0.38	0.29	0.48	0.27	28.42	(0,0):33,(0,1):13,(1,0):63,(1,1):76	0:112,1:40	(0,0):38,(0,1):36,(1,0):55,(1,1):105	0:98,1:98	chr3	ENST00000469224.1	ALAS1	SE	UTR5	uORF,IRES	diff
chr3:195800801:195800996:-@chr3:195802030:195802231:-@chr3:195803935:195803993:-	0.7	0.5	0.86	0.97	0.94	0.99	-0.27	294.42	(0,0):31,(0,1):3,(1,0):34,(1,1):25	0:42,1:20	(0,0):217,(0,1):3,(1,0):481,(1,1):157	0:628,1:13	chr3	ENST00000420415.1	TFRC	SE	CDS	NA	diff
chr3:49711795:49712054:+@chr3:49712616:49712742:+@chr3:49713127:49713220:+	0.75	0.64	0.85	0.95	0.92	0.98	-0.2	67.76	(0,0):57,(0,1):14,(1,0):69,(1,1):19	0:85,1:17	(0,0):143,(0,1):7,(1,0):247,(1,1):41	0:286,1:9	chr3	ENST00000296456.5	APEH	SE	CDS	NA	diff
chr3:139098869:139102277:-@chr3:139103846:139104271:-@chr3:139108390:139108522:-	0.34	0.17	0.56	0.05	0.02	0.08	0.29	102.19	(0,0):38,(0,1):11,(1,0):6,(1,1):17	0:9,1:25	(0,0):203,(0,1):173,(1,0):10,(1,1):192	0:13,1:362	chr3	ENST00000333188.4	COPB2	SE	CDS	NA	diff
chr1:6845384:6845635:+@chr1:6880241:6880310:+@chr1:6885152:6885270:+	0.92	0.9	0.94	0.78	0.72	0.82	0.14	2.12154e+08	(0,0):248,(0,1):38,(1,0):590,(1,1):198	0:759,1:67	(0,0):202,(0,1):60,(1,0):285,(1,1):144	0:384,1:105	chr1	ENST00000303635.6	CAMTA1	SE	CDS	NA	diff
chr1:53370316:53370505:-@chr1:53370706:53372283:-@chr1:53373540:53373626:-	0.1	0.08	0.12	0.3	0.25	0.37	-0.2	8.4635e+26	(0,0):228,(0,1):20,(1,0):106,(1,1):117	0:116,1:127	(0,0):283,(0,1):16,(1,0):301,(1,1):105	0:327,1:95	chr1	ENST00000371522.4	ECHDC2	SE	CDS	SF2,GY-BOX	diff
chr1:68947123:68947295:-@chr1:68947729:68948580:-@chr1:68949633:68949773:-	0.1	0.07	0.15	0.24	0.2	0.28	-0.14	5038.2	(0,0):56,(0,1):19,(1,0):28,(1,1):53	0:32,1:68	(0,0):311,(0,1):43,(1,0):288,(1,1):274	0:365,1:240	chr1	ENST00000456315.2	DEPDC1	SE	CDS	NA	diff
chr1:46072154:46072263:+@chr1:46072993:46074009:+@chr1:46078841:46079094:+	0.51	0.43	0.6	0.77	0.74	0.8	-0.26	23282.2	(0,0):394,(0,1):32,(1,0):188,(1,1):23	0:200,1:43	(0,0):1757,(0,1):124,(1,0):2232,(1,1):137	0:2325,1:168	chr1	ENST00000453748.1	NASP	SE	CDS	SF2,SF2SAN_63,SF2SAN_62,ConservedRegion,UNR-bs	diff
chr1:53370316:53370505:-@chr1:53370706:53373434:-@chr1:53373540:53373626:-	0.05	0.04	0.07	0.22	0.18	0.27	-0.17	2.46804e+45	(0,0):237,(0,1):20,(1,0):97,(1,1):117	0:98,1:136	(0,0):217,(0,1):16,(1,0):367,(1,1):105	0:396,1:92	chr1	ENST00000371522.4	ECHDC2	SE	CDS	SF2,K-BOX,GY-BOX,L2c	diff
chr1:153606296:153606819:+@chr1:153609048:153610924:+@chr1:153614719:153618775:+	0.62	0.57	0.67	0.74	0.68	0.79	-0.12	10.9	(0,0):547,(1,0):714,(1,1):2787	0:2408,1:1093	(0,0):676,(1,0):1000,(1,1):3279	0:3393,1:886	chr1	ENST00000368694.3	CHTOP	SE	UTR5	ConservedRegion,uORF,IRES	diff
chr14:50069088:50069186:+@chr14:50074118:50074839:+@chr14:50080974:50081391:+	0.27	0.23	0.32	0.53	0.46	0.6	-0.26	1.73277e+21	(0,0):134,(0,1):51,(1,0):182,(1,1):305	0:273,1:265	(0,0):195,(0,1):28,(1,0):305,(1,1):263	0:429,1:167	chr14	ENST00000298288.6	LRR1	SE	CDS	ConservedRegion	diff
chr14:54863567:54863795:+@chr14:54866612:54866694:+@chr14:54868242:54868297:+	0.96	0.92	0.99	0.84	0.77	0.9	0.12	15.89	(0,0):70,(0,1):3,(1,0):150,(1,1):2	0:152,1:3	(0,0):95,(0,1):18,(1,0):136,(1,1):1	0:137,1:18	chr14	ENST00000335183.6	CDKN3	SE	CDS	NA	diff
chr14:54863567:54863795:+@chr14:54866617:54866694:+@chr14:54868242:54868297:+	0.91	0.83	0.97	0.68	0.56	0.78	0.23	24.41	(0,0):164,(0,1):3,(1,0):56,(1,1):2	0:58,1:3	(0,0):176,(0,1):18,(1,0):55,(1,1):1	0:55,1:19	chr14	ENST00000335183.6	CDKN3	SE	CDS	NA	diff
chr16:75675462:75675621:-@chr16:75678181:75678360:-@chr16:75681476:75681645:-	0.54	0.46	0.62	0.27	0.23	0.31	0.27	1.00952e+27	(0,0):134,(0,1):48,(1,0):156,(1,1):160	0:266,1:98	(0,0):271,(0,1):162,(1,0):171,(1,1):373	0:281,1:425	chr16	ENST00000319410.5	KARS	SE	CDS	NA	diff
chr16:29458119:29458347:-@chr16:29463430:29465434:-@chr16:29465512:29466369:-	0.69	0.63	0.75	0.46	0.41	0.51	0.23	1.26929e+09	(0,0):787,(1,0):1218,(1,1):896	0:1813,1:301	(0,0):505,(0,1):1,(1,0):668,(1,1):737	0:1049,1:357	chr16	ENST00000565417.1	RP11-345J4.5	SE	UTR5	ConservedRegion,MIR3,PAS	diff
chr16:30004788:30005129:-@chr16:30005969:30006164:-@chr16:30006424:30006784:-	0.55	0.45	0.65	0.8	0.69	0.89	-0.25	53.26	(0,0):818,(0,1):27,(1,0):86,(1,1):253	0:208,1:158	(0,0):1136,(0,1):11,(1,0):121,(1,1):256	0:339,1:49	chr16	ENST00000279392.3	HIRIP3	SE	CDS	SF2	diff
chr16:30004788:30005129:-@chr16:30005227:30006164:-@chr16:30006424:30006784:-	0.82	0.77	0.87	0.95	0.92	0.97	-0.13	35701.1	(0,0):276,(0,1):27,(1,0):628,(1,1):253	0:840,1:68	(0,0):322,(0,1):11,(1,0):935,(1,1):256	0:1179,1:23	chr16	ENST00000279392.3	HIRIP3	SE	CDS	SF2SAN_712,SF2,ConservedRegion,GA-rich	diff
chr21:45719925:45720073:+@chr21:45725071:45725300:+@chr21:45726564:45726648:+	0.33	0.19	0.48	0.08	0.04	0.12	0.25	147.83	(0,0):102,(0,1):13,(1,0):13	0:13,1:13	(0,0):389,(0,1):79,(1,0):15,(1,1):1	0:15,1:80	chr21	ENST00000349048.4	PFKL	SE	CDS	IRES	diff
chr6:39071836:39073552:-@chr6:39077090:39081496:-@chr6:39082659:39082988:-	0.2	0.18	0.22	0.36	0.33	0.4	-0.16	2.43431e+87	(0,0):38,(0,1):72,(1,0):520,(1,1):1069	0:744,1:917	(0,0):85,(0,1):46,(1,0):864,(1,1):957	0:1210,1:657	chr6	ENST00000373249.1	SAYSD1	SE	CDS	L1MA8,SF2,L1MA5,PAS	diff
chr6:52147451:52147659:-@chr6:52148092:52148200:-@chr6:52149395:52149646:-	0.78	0.67	0.88	0.95	0.93	0.98	-0.17	30.12	(0,0):127,(0,1):9,(1,0):66,(1,1):112	0:159,1:28	(0,0):719,(0,1):11,(1,0):507,(1,1):750	0:1241,1:27	chr6	ENST00000229854.5	MCM3	SE	UTR5	NA	diff
chr6:86350164:86350282:-@chr6:86351010:86351169:-@chr6:86352515:86353053:-	0.67	0.58	0.75	0.85	0.82	0.88	-0.18	192029	(0,0):77,(0,1):32,(1,0):108,(1,1):128	0:194,1:74	(0,0):323,(0,1):80,(1,0):716,(1,1):541	0:1170,1:167	chr6	ENST00000355238.6	SYNCRIP	SE	UTR5	IRES	diff
chr17:5335891:5336033:+@chr17:5336034:5336198:+	0.55	0.44	0.69	0.93	0.82	0.99	-0.38	1.2375e+06	(0,0):548,(1,0):165,(1,1):126	0:220,1:71	(0,0):477,(1,0):179,(1,1):70	0:242,1:7	chr17	ENST00000536255.2	RPAIN	TandemUTR	UTR3	ConservedRegion,PAS	diff
chr16:15130132:15131544:+@chr16:15131545:15132187:+	0.65	0.54	0.77	0.23	0.19	0.27	0.42	3.19464e+34	(0,0):222,(1,0):178,(1,1):583	0:487,1:274	(0,0):399,(1,0):167,(1,1):1533	0:519,1:1181	chr16	ENST00000563679.1	PDXDC1	TandemUTR	UTR3	ConservedRegion,PAS,K-BOX	diff
chr4:57897254:57897481:-@chr4:57896941:57897253:-	0.19	0.11	0.29	0.93	0.8	0.99	-0.74	8.31314e+61	(0,0):66,(1,0):25,(1,1):73	0:38,1:60	(0,0):166,(1,0):166,(1,1):67	0:221,1:12	chr4	ENST00000295666.4	IGFBP7	TandemUTR	UTR3	ConservedRegion,PAS,K-BOX	diff
chr21:45749772:45750079:-@chr21:45748825:45749771:-	0.46	0.35	0.62	0.91	0.75	0.99	-0.45	1.27809e+07	(0,0):22,(1,0):143,(1,1):81	0:166,1:58	(0,0):53,(1,0):372,(1,1):96	0:450,1:18	chr21	ENST00000339818.4	C21orf2	TandemUTR	UTR3	PAS,GY-BOX	diff
chr11:94278892:94279771:+@chr11:94279772:94283061:+	0.28	0.2	0.41	0.58	0.45	0.74	-0.3	52.32	(0,0):12,(1,0):67,(1,1):62	0:82,1:47	(0,0):13,(1,0):197,(1,1):86	0:253,1:30	chr11	ENST00000543336.1	PIWIL4	TandemUTR	UTR3	NA	diff
chr19:33870598:33870898:+@chr19:33870899:33873592:+	0.66	0.58	0.75	0.97	0.93	1	-0.31	5.26411e+23	(0,0):158,(1,0):2233,(1,1):289	0:2409,1:113	(0,0):292,(1,0):5291,(1,1):421	0:5703,1:9	chr19	ENST00000284000.3	CEBPG	TandemUTR	UTR3	T-rich,ConservedRegion,AT_rich,PAS	diff
chr8:74705185:74706335:-@chr8:74702846:74705184:-	0.28	0.22	0.35	0.42	0.36	0.48	-0.14	7.11	(0,0):22,(1,0):108,(1,1):182	0:159,1:131	(0,0):46,(1,0):331,(1,1):368	0:493,1:206	chr8	ENST00000523278.1	UBE2W	TandemUTR	UTR3	(TTTA)n,hsa-miR-148b,ConservedRegion,hsa-miR-586,AT_rich,hsa-miR-106b,hsa-miR-25,PAS,hsa-miR-619,hsa-miR-621,hsa-miR-153,hsa-miR-93,A-rich,UNR-bs	diff
chr8:48973388:48974126:+@chr8:48974127:48974454:+	0.13	0.09	0.19	0.27	0.21	0.32	-0.14	14.48	(0,0):55,(1,0):24,(1,1):386	0:57,1:353	(0,0):143,(1,0):103,(1,1):802	0:344,1:561	chr8	ENST00000523111.1	UBE2V2	TandemUTR	UTR3	ConservedRegion,PAS	diff
chr17:43183007:43183348:+@chr17:43183349:43186384:+	0.43	0.39	0.47	0.62	0.57	0.67	-0.19	2.19478e+13	(0,0):190,(1,0):3092,(1,1):643	0:3362,1:373	(0,0):223,(1,0):4460,(1,1):641	0:4849,1:252	chr17	ENST00000258960.2	NMT1	TandemUTR	UTR3	ConservedRegion,hsa-miR-15a,PAS,(TA)n	diff
chr2:46808222:46808873:+@chr2:46808874:46810105:+	0.47	0.42	0.54	0.63	0.57	0.69	-0.16	23.9	(0,0):131,(1,0):495,(1,1):493	0:757,1:231	(0,0):199,(1,0):1110,(1,1):829	0:1669,1:270	chr2	ENST00000238738.4	RHOQ	TandemUTR	UTR3	ConservedRegion,hsa-miR-488,hsa-miR-32,hsa-miR-211,hsa-miR-101,hsa-miR-26a,hsa-miR-26b	diff
chr2:28635315:28635838:+@chr2:28635839:28637514:+	0.42	0.33	0.52	0.6	0.52	0.71	-0.18	9.2	(0,0):43,(1,0):198,(1,1):130	0:251,1:77	(0,0):72,(1,0):476,(1,1):215	0:614,1:77	chr2	ENST00000379619.1	FOSL2	TandemUTR	UTR3	ConservedRegion,hsa-miR-32,K-BOX	diff
chr2:75882411:75882857:+@chr2:75882858:75889333:+	0.28	0.23	0.33	0.47	0.42	0.53	-0.19	9.24832e+06	(0,0):76,(1,0):725,(1,1):153	0:771,1:107	(0,0):155,(1,0):2561,(1,1):317	0:2709,1:169	chr2	ENST00000393909.2	MRPL19	TandemUTR	UTR3	L1MB4,L1ME3B,L1M5,PAS,AluJr,HAL1,UNR-bs	diff
chr2:85835408:85836066:-@chr2:85833775:85835407:-	0.32	0.28	0.38	0.59	0.51	0.69	-0.27	1.2756e+13	(0,0):105,(1,0):280,(1,1):314	0:395,1:199	(0,0):86,(1,0):469,(1,1):286	0:647,1:108	chr2	ENST00000459775.1	USP39	TandemUTR	UTR3	ConservedRegion,PAS,AluSc8	diff
chr2:5834179:5835765:+@chr2:5835766:5841517:+	0.24	0.22	0.27	0.45	0.42	0.49	-0.21	3.34971e+98	(0,0):130,(1,0):594,(1,1):647	0:726,1:515	(0,0):251,(1,0):2393,(1,1):1390	0:3015,1:768	chr2	ENST00000322002	ENSG00000176887	TandemUTR	UTR3	NA	diff
chr2:96937089:96937304:+@chr2:96937305:96939865:+	0.29	0.25	0.34	0.42	0.37	0.47	-0.13	22.02	(0,0):123,(1,0):1054,(1,1):202	0:1113,1:143	(0,0):191,(1,0):2454,(1,1):328	0:2594,1:188	chr2	ENST00000488633.1	CIAO1	TandemUTR	UTR3	ConservedRegion,BRD-BOX,MER106A,MLT1A,Charlie1a,AluSg4,K-BOX,AluSp,AluSz6	diff
chr2:99216944:99217213:-@chr2:99215863:99216943:-	0.3	0.24	0.36	0.52	0.42	0.64	-0.22	470.74	(0,0):90,(1,0):237,(1,1):147	0:270,1:114	(0,0):90,(1,0):387,(1,1):138	0:451,1:74	chr2	ENST00000328709.3	COA5	TandemUTR	UTR3	ConservedRegion,PAS,K-BOX,MLT1K,GY-BOX	diff
chr20:42089703:42090416:+@chr20:42090417:42092245:+	0.69	0.62	0.77	0.97	0.92	1	-0.28	3.47407e+20	(0,0):109,(1,0):808,(1,1):409	0:1092,1:125	(0,0):344,(1,0):2992,(1,1):1058	0:3952,1:98	chr20	ENST00000244020.3	SRSF6	TandemUTR	UTR3	ConservedRegion,BRD-BOX,PAS	diff
chr10:53457014:53457457:-@chr10:53455244:53457013:-	0.19	0.13	0.28	0.38	0.32	0.45	-0.19	27.5	(0,0):15,(1,0):42,(1,1):48	0:50,1:40	(0,0):76,(1,0):354,(1,1):199	0:440,1:113	chr10	ENST00000401604.2	PRKG1	TandemUTR	UTR3	NA	diff
chr14:35181217:35182069:-@chr14:35179651:35181216:-	0.34	0.31	0.37	0.47	0.43	0.5	-0.13	1.1831e+06	(0,0):150,(1,0):626,(1,1):925	0:932,1:619	(0,0):192,(1,0):1281,(1,1):1371	0:1939,1:713	chr14	ENST00000341223.3	CFL2	TandemUTR	UTR3	ConservedRegion,BRD-BOX,PAS,K-BOX	diff
chr14:67850157:67850577:+@chr14:67850578:67853233:+	0.19	0.16	0.22	0.35	0.31	0.39	-0.16	2.80858e+18	(0,0):174,(1,0):399,(1,1):280	0:448,1:231	(0,0):267,(1,0):1367,(1,1):515	0:1542,1:340	chr14	ENST00000256383.4	EIF2S1	TandemUTR	UTR3	ConservedRegion,FLAM_C,PAS,K-BOX,MamRep434,AluJr4,UNR-bs	diff
chr14:75600947:75601586:-@chr14:75598170:75600946:-	0.32	0.3	0.35	0.49	0.46	0.53	-0.17	1.60474e+46	(0,0):215,(1,0):1664,(1,1):1056	0:2007,1:713	(0,0):263,(1,0):3144,(1,1):1299	0:3826,1:617	chr14	ENST00000303575.4	TMED10	TandemUTR	UTR3	ConservedRegion,BRD-BOX,PAS,L1MD2,AluSz,GY-BOX	diff
chr18:12329114:12329562:-@chr18:12328945:12329113:-	0.11	0.07	0.18	0.24	0.19	0.3	-0.13	5.58	(0,0):105,(1,0):15,(1,1):308	0:37,1:286	(0,0):129,(1,0):75,(1,1):708	0:273,1:510	chr18	ENST00000591909.1	TUBB6	TandemUTR	UTR3	ConservedRegion,PAS	diff
chr3:112723754:112724381:-@chr3:112721289:112723753:-	0.29	0.22	0.39	0.55	0.46	0.66	-0.26	49.24	(0,0):13,(1,0):104,(1,1):83	0:131,1:56	(0,0):60,(1,0):451,(1,1):187	0:541,1:97	chr3	ENST00000485330.1	GTPBP8	TandemUTR	UTR3	LTR47A,PAS,LTR16E2,MER5A,(CA)n,AluJb,UNR-bs	diff
chr3:51431503:51431829:+@chr3:51431830:51434646:+	0.36	0.31	0.43	0.59	0.51	0.68	-0.23	6292.99	(0,0):146,(1,0):732,(1,1):183	0:803,1:112	(0,0):180,(1,0):1214,(1,1):186	0:1338,1:62	chr3	ENST00000323686	ENSG00000179837	TandemUTR	UTR3	ConservedRegion,PAS	diff
chr11:116649274:116649639:-@chr11:116648925:116649273:-	0.14	0.11	0.18	0.29	0.23	0.35	-0.15	3460.07	(0,0):124,(1,0):77,(1,1):475	0:159,1:393	(0,0):118,(1,0):111,(1,1):325	0:189,1:247	chr11	ENST00000227322.3	ZNF259	TandemUTR	UTR3	ConservedRegion	diff
chrX:20145124:20146422:-@chrX:20142641:20145123:-	0.41	0.39	0.44	0.52	0.5	0.54	-0.11	1.50673e+13	(0,0):340,(1,0):1845,(1,1):2217	0:2711,1:1351	(0,0):589,(1,0):4336,(1,1):4107	0:6464,1:1979	chrX	ENST00000379607.5	EIF1AX	TandemUTR	UTR3	ConservedRegion,PAS,MIR,UNR-bs	diff
chr19:46287042:46287499:-@chr19:46286203:46287041:-	0.53	0.44	0.63	0.81	0.71	0.94	-0.28	93.17	(0,0):74,(1,0):249,(1,1):218	0:359,1:108	(0,0):105,(1,0):559,(1,1):316	0:803,1:72	chr19	ENST00000270223.5	DMWD	TandemUTR	UTR3	ConservedRegion,GY-BOX,UNR-bs	diff
chr9:22004562:22005984:-@chr9:22002900:22004561:-	0.21	0.18	0.24	0.37	0.33	0.4	-0.16	1.077e+31	(0,0):54,(1,0):216,(1,1):829	0:384,1:661	(0,0):118,(1,0):670,(1,1):1488	0:1198,1:960	chr9	ENST00000584351.1	CDKN2B-AS1	TandemUTR	UTR3	AT_rich,PAS,MIRb,UNR-bs	diff
chr9:27329127:27330583:-@chr9:27325205:27329126:-	0.32	0.26	0.38	0.47	0.39	0.55	-0.15	6.22	(0,0):25,(1,0):195,(1,1):221	0:270,1:146	(0,0):25,(1,0):347,(1,1):265	0:485,1:127	chr9	ENST00000262244.5	MOB3B	TandemUTR	UTR3	ConservedRegion,hsa-miR-15a,BRD-BOX,MER106A,PAS,hsa-miR-621,hsa-miR-103,L1MC4,BC200,hsa-miR-16,hsa-miR-15b,(TG)n	diff
chr9:86583822:86584320:-@chr9:86583074:86583821:-	0.31	0.29	0.33	0.44	0.41	0.47	-0.13	1.3761e+38	(0,0):630,(1,0):1116,(1,1):2041	0:1744,1:1413	(0,0):918,(1,0):2065,(1,1):2665	0:3186,1:1544	chr9	ENST00000376281.4	HNRNPK	TandemUTR	UTR3	ConservedRegion,PAS	diff
chr1:145509211:145509370:+@chr1:145509371:145511443:+	0.25	0.22	0.28	0.44	0.39	0.51	-0.19	7.33172e+20	(0,0):618,(1,0):2018,(1,1):337	0:2109,1:246	(0,0):515,(1,0):2789,(1,1):262	0:2907,1:144	chr1	ENST00000330165.7	RBM8A	TandemUTR	UTR3	SF2,ConservedRegion,PAS,AluJo	diff
chr1:47842417:47843454:+@chr1:47843455:47844509:+	0.42	0.36	0.48	0.55	0.5	0.6	-0.13	18.99	(0,0):78,(1,0):326,(1,1):717	0:624,1:419	(0,0):112,(1,0):693,(1,1):1164	0:1404,1:453	chr1	ENST00000371873.5	CMPK1	TandemUTR	UTR3	ConservedRegion,hsa-miR-106b,hsa-miR-548b-3p,PAS,hsa-miR-105,hsa-miR-548b-5p	diff
chr1:6283549:6285138:-@chr1:6281251:6283548:-	0.32	0.3	0.34	0.45	0.43	0.47	-0.13	7.11913e+50	(0,0):173,(1,0):1453,(1,1):2981	0:2320,1:2114	(0,0):225,(1,0):2833,(1,1):4153	0:4816,1:2170	chr1	ENST00000343813.5	ICMT	TandemUTR	UTR3	SF2,ConservedRegion,BRD-BOX,PAS,AluSz,hsa-miR-9,AluSx3	diff
chr1:228363214:228364083:+@chr1:228364084:228369958:+	0.16	0.14	0.19	0.39	0.34	0.45	-0.23	1.8129e+47	(0,0):27,(1,0):241,(1,1):203	0:281,1:163	(0,0):37,(1,0):804,(1,1):281	0:913,1:172	chr1	ENST00000546123.1	IBA57	TandemUTR	UTR3	(TTCA)n,L1M5,MLT1A0,MER74B,L1PB4,AluSx,K-BOX,AluSc,MER89,L1MEe,(TG)n,AT_rich,ConservedRegion,PAS,AluJo,AluJb,UNR-bs	diff
chr13:101288786:101288988:-@chr13:101287190|101287449:101287059:-	0.65	0.43	0.91	0.74	0.56	0.94	-0.09	0.47	(0,0):65,(1,0):38,(1,1):60	0:74,1:24	(0,0):82,(1,0):64,(1,1):86	0:116,1:34	chr13	ENST00000376234.3	TMTC4	A3SS	CDS	ConservedRegion	no_diff
chr19:17173508:17173589:-@chr19:17170899|17170902:17170807:-	0.85	0.76	0.94	0.77	0.66	0.86	0.08	0.39	(0,0):119,(0,1):6,(1,0):42,(1,1):18	0:58,1:8	(0,0):177,(0,1):16,(1,0):58,(1,1):36	0:82,1:28	chr19	ENST00000253669.4	HAUS8	A3SS	CDS	NA	no_diff
chr19:49993107:49993179:+@chr19:49993489|49993732:49993833:+	0.9	0.83	0.97	0.86	0.8	0.92	0.04	0.16	(0,0):8645,(1,0):2264,(1,1):1052	0:3241,1:75	(0,0):6933,(1,0):1783,(1,1):862	0:2523,1:122	chr19	ENST00000391857.4	RPL13A	A3SS	CDS	ConservedRegion	no_diff
chr19:36122233:36122307:+@chr19:36123979|36124003:36124154:+	0.67	0.5	0.88	0.72	0.45	0.91	-0.05	0.37	(0,0):888,(0,1):4,(1,0):27,(1,1):158	0:100,1:89	(0,0):1271,(0,1):1,(1,0):26,(1,1):210	0:172,1:65	chr19	ENST00000588161.1	RBM42	A3SS	CDS	NA	no_diff
chr19:47220208:47220384:-@chr19:47219516|47219792:47219388:-	0.67	0.35	0.94	0.7	0.46	0.91	-0.03	0.58	(0,0):92,(1,0):20,(1,1):26	0:37,1:9	(0,0):163,(1,0):27,(1,1):32	0:55,1:4	chr19	ENST00000291281.3	PRKD2	A3SS	UTR5	ConservedRegion,GC_rich,IRES	no_diff
chr19:19416658:19416885:-@chr19:19414721|19414852:19414533:-	0.18	0.09	0.3	0.14	0.06	0.24	0.04	0.24	(0,0):103,(0,1):20,(1,0):9,(1,1):55	0:17,1:67	(0,0):227,(0,1):11,(1,0):7,(1,1):106	0:18,1:106	chr19	ENST00000588731.1	SUGP1	A3SS	CDS	ConservedRegion	no_diff
chr19:3206150:3206188:+@chr19:3206260|3206263:3206423:+	0.58	0.46	0.69	0.59	0.5	0.68	-0.01	0.21	(0,0):173,(0,1):24,(1,0):35,(1,1):99	0:94,1:64	(0,0):341,(0,1):47,(1,0):75,(1,1):239	0:208,1:153	chr19	ENST00000590671.1	NCLN	A3SS	CDS	NA	no_diff
chr19:36236026:36236253:-@chr19:36235322|36235639:36235224:-	0.3	0.22	0.39	0.33	0.23	0.44	-0.03	0.19	(0,0):267,(0,1):35,(1,0):49,(1,1):42	0:62,1:64	(0,0):190,(0,1):22,(1,0):38,(1,1):35	0:55,1:40	chr19	ENST00000590135.1	U2AF1L4	A3SS	CDS	ConservedRegion,GY-BOX	no_diff
chr19:36505077:36505141:-@chr19:36503991|36504324:36503923:-	0.79	0.61	0.93	0.7	0.48	0.88	0.09	0.46	(0,0):442,(0,1):3,(1,0):78	0:78,1:3	(0,0):321,(0,1):3,(1,0):46	0:46,1:3	chr19	ENST00000490986.1	ALKBH6	A3SS	CDS	ConservedRegion,IRES,uORF	no_diff
chr19:9649396:9649674:+@chr19:9649812|9650082:9650410:+	0.8	0.54	0.96	0.75	0.42	0.98	0.05	0.49	(0,0):1,(0,1):1,(1,0):19,(1,1):14	0:33,1:1	(0,0):4,(1,0):8,(1,1):12	0:19,1:1	chr19	NA	NA	A3SS	UTR	NA	no_diff
chr19:58920048:58920532:+@chr19:58921308|58921373:58921458:+	0.64	0.42	0.86	0.7	0.49	0.88	-0.06	0.43	(0,0):45,(0,1):3,(1,0):10,(1,1):45	0:45,1:13	(0,0):68,(0,1):4,(1,0):18,(1,1):70	0:69,1:23	chr19	ENST00000306910.3	ZNF584	A3SS	CDS	NA	no_diff
chr19:58920048:58920532:+@chr19:58921332|58921373:58921458:+	0.71	0.45	0.89	0.7	0.49	0.89	0.01	0.38	(0,0):44,(0,1):3,(1,0):11,(1,1):45	0:47,1:12	(0,0):70,(0,1):4,(1,0):16,(1,1):70	0:36,1:54	chr19	ENST00000306910.3	ZNF584	A3SS	CDS	NA	no_diff
chr19:59060107:59060143:+@chr19:59060229|59060253:59060277:+	0.54	0.12	0.89	0.56	0.11	0.97	-0.02	0.79	(0,0):590,(1,0):35	00:35:00	(0,0):2545,(1,0):156	0.108333	chr19	ENST00000253024.4	TRIM28	A3SS	CDS	NA	no_diff
chr19:36592916:36593053:+@chr19:36593639|36593654:36593753:+	0.77	0.58	0.94	0.85	0.76	0.93	-0.08	0.36	(0,0):111,(0,1):4,(1,0):18,(1,1):44	0:54,1:12	(0,0):293,(0,1):8,(1,0):66,(1,1):114	0:170,1:18	chr19	ENST00000401500.2	WDR62	A3SS	CDS	NA	no_diff
chr19:15510113:15510221:-@chr19:15509514|15509577:15509441:-	0.86	0.65	0.99	0.78	0.57	0.95	0.08	0.39	(0,0):148,(1,0):36,(1,1):57	0:82,1:11	(0,0):251,(1,0):39,(1,1):86	0:77,1:48	chr19	ENST00000397410.3	AKAP8L	A3SS	CDS	ConservedRegion	no_diff
chr19:430684:430747:-@chr19:422379|422456:422146:-	0.9	0.69	0.99	0.87	0.67	0.99	0.03	0.26	(0,0):216,(1,0):28,(1,1):74	0:96,1:6	(0,0):260,(1,0):27,(1,1):55	0.0569444	chr19	ENST00000588376.1	SHC2	A3SS	CDS	NA	no_diff
chr19:36502306:36502366:-@chr19:36501585|36501947:36501469:-	0.79	0.68	0.89	0.76	0.63	0.9	0.03	0.22	(0,0):545,(0,1):6,(1,0):345,(1,1):87	0:409,1:29	(0,0):384,(0,1):4,(1,0):245,(1,1):71	0:296,1:24	chr19	ENST00000490986.1	ALKBH6	A3SS	CDS	ConservedRegion,IRES	no_diff
chr19:36502306:36502366:-@chr19:36501585|36501979:36501469:-	0.7	0.58	0.82	0.63	0.5	0.78	0.07	0.36	(0,0):599,(0,1):6,(1,0):291,(1,1):87	0:343,1:41	(0,0):428,(0,1):4,(1,0):201,(1,1):71	0:255,1:21	chr19	ENST00000490986.1	ALKBH6	A3SS	CDS	ConservedRegion,IRES	no_diff
chr12:111082461:111082934:+@chr12:111085001|111085016:111085141:+	0.12	0.04	0.24	0.11	0.02	0.25	0.01	0.21	(0,0):71,(0,1):35,(1,0):4,(1,1):63	0:9,1:93	(0,0):108,(0,1):31,(1,0):3,(1,1):76	0:9,1:101	chr12	ENST00000551590.1	TCTN1	A3SS	CDS	ConservedRegion	no_diff
chr12:57998406:57998641:+@chr12:57999772|57999973:58000035:+	0.45	0.27	0.65	0.52	0.32	0.77	-0.07	0.42	(0,0):250,(0,1):6,(1,0):15,(1,1):19	0:22,1:18	(0,0):227,(0,1):4,(1,0):16,(1,1):16	0:24,1:12	chr12	ENST00000549583.1	DTX3	A3SS	UTR5	NA	no_diff
chr12:30869442:30869610:-@chr12:30868015|30868075:30867893:-	0.71	0.46	0.91	0.66	0.46	0.83	0.05	0.47	(0,0):24,(0,1):2,(1,0):10,(1,1):13	0:22,1:3	(0,0):101,(0,1):5,(1,0):18,(1,1):39	0:41,1:21	chr12	ENST00000433722.2	CAPRIN2	A3SS	CDS	NA	no_diff
chr12:123005051:123005128:-@chr12:123003576|123003598:123003386:-	0.39	0.18	0.71	0.35	0.24	0.48	0.04	0.36	(0,0):62,(0,1):6,(1,0):5,(1,1):15	0:13,1:13	(0,0):419,(0,1):27,(1,0):25,(1,1):243	0:173,1:122	chr12	ENST00000331738.6	RSRC2	A3SS	CDS	NA	no_diff
chr12:123832576:123832680:-@chr12:123830114|123830117:123829805:-	0.48	0.11	0.84	0.41	0.27	0.56	0.07	0.64	(0,0):5,(0,1):2,(1,0):2,(1,1):19	0:10,1:13	(0,0):91,(0,1):25,(1,0):17,(1,1):188	0:104,1:126	chr12	ENST00000420886.2	SBNO1	A3SS	CDS	NA	no_diff
chr12:133430017:133430690:-@chr12:133428320|133428323:133428204:-	0.48	0.35	0.61	0.4	0.28	0.52	0.08	0.32	(0,0):90,(0,1):28,(1,0):26,(1,1):67	0:54,1:67	(0,0):104,(0,1):40,(1,0):27,(1,1):110	0:76,1:101	chr12	ENST00000315585.7	CHFR	A3SS	CDS	NA	no_diff
chr11:67377852:67378678:+@chr11:67378948|67378993:67379040:+	0.77	0.63	0.88	0.78	0.63	0.92	-0.01	0.28	(0,0):905,(0,1):6,(1,0):46,(1,1):503	0:404,1:151	(0,0):1093,(0,1):6,(1,0):51,(1,1):639	0:574,1:122	chr11	ENST00000322776.6	NDUFV1	A3SS	CDS	NA	no_diff
chr11:126126462:126126747:+@chr11:126131320|126131323:126131379:+	0.66	0.43	0.86	0.73	0.54	0.89	-0.07	0.4	(0,0):62,(0,1):4,(1,0):10,(1,1):71	0:59,1:26	(0,0):115,(0,1):6,(1,0):19,(1,1):62	0:61,1:26	chr11	ENST00000533050.1	FAM118B	A3SS	CDS	NA	no_diff
chr11:65769381:65770101:-@chr11:65767952|65767976:65767774:-	0.48	0.32	0.65	0.47	0.31	0.64	0.01	0.3	(0,0):841,(0,1):14,(1,0):18,(1,1):402	0:191,1:243	(0,0):566,(0,1):12,(1,0):16,(1,1):354	0:252,1:130	chr11	ENST00000526451.1	EIF1AD	A3SS	UTR5	NA	no_diff
chr11:66247880:66247936:+@chr11:66249664|66249667:66249941:+	0.59	0.3	0.83	0.54	0.43	0.65	0.05	0.49	(0,0):26,(0,1):4,(1,0):6,(1,1):45	0:42,1:13	(0,0):100,(0,1):27,(1,0):34,(1,1):247	0:179,1:129	chr11	ENST00000531863.1	DPP3	A3SS	UTR5	ConservedRegion	no_diff
chr11:65769511:65769636:-@chr11:65767952|65767976:65767774:-	0.43	0.26	0.63	0.45	0.26	0.63	-0.02	0.35	(0,0):219,(0,1):13,(1,0):15,(1,1):106	0:63,1:71	(0,0):227,(0,1):8,(1,0):13,(1,1):122	0:68,1:75	chr11	ENST00000526451.1	EIF1AD	A3SS	UTR5	NA	no_diff
chr11:64081711:64081839:+@chr11:64082213|64082216:64082383:+	0.77	0.61	0.89	0.69	0.52	0.84	0.08	0.37	(0,0):61,(0,1):6,(1,0):23,(1,1):86	0:93,1:22	(0,0):67,(0,1):9,(1,0):22,(1,1):53	0:60,1:24	chr11	ENST00000406310.1	ESRRA	A3SS	CDS	NA	no_diff
chr11:67169199:67169402:-@chr11:67168665|67168703:67168539:-	0.78	0.59	0.94	0.7	0.5	0.93	0.08	0.42	(0,0):728,(1,0):44,(1,1):342	0:309,1:77	(0,0):621,(1,0):31,(1,1):315	0:338,1:8	chr11	ENST00000312989.7	PPP1CA	A3SS	CDS	NA	no_diff
chr11:67264702:67264907:-@chr11:67263816|67263819:67263649:-	0.64	0.45	0.82	0.63	0.43	0.79	0.01	0.39	(0,0):43,(0,1):7,(1,0):14,(1,1):41	0:41,1:21	(0,0):52,(0,1):8,(1,0):15,(1,1):68	0:53,1:38	chr11	ENST00000534749.1	PITPNM1	A3SS	CDS	NA	no_diff
chr11:118971728:118972852:-@chr11:118971537|118971587:118971340:-	0.66	0.35	0.99	0.72	0.47	0.94	-0.06	0.72	(0,0):60,(1,0):6,(1,1):175	0:69,1:112	(0,0):159,(0,1):1,(1,0):14,(1,1):371	0:357,1:29	chr11	ENST00000409993.2	DPAGT1	A3SS	CDS	NA	no_diff
chr11:3832480:3832654:+@chr11:3845113|3845500:3845606:+	0.89	0.69	1	0.87	0.69	0.98	0.02	0.28	(0,0):167,(1,0):85,(1,1):47	0:130,1:2	(0,0):186,(1,0):86,(1,1):46	0:119,1:13	chr11	ENST00000528216.1	PGAP2	A3SS	CDS	NA	no_diff
chr11:61644983:61645059:-@chr11:61643927|61644435:61643831:-	0.7	0.31	0.99	0.79	0.54	0.96	-0.09	0.74	(0,0):60,(1,0):18,(1,1):5	0:18,1:5	(0,0):69,(1,0):44,(1,1):9	0:51,1:2	chr11	ENST00000278829.2	FADS3	A3SS	CDS	ConservedRegion	no_diff
chr11:65479468:65479750:+@chr11:65479818|65479850:65479916:+	0.49	0.25	0.74	0.53	0.32	0.73	-0.04	0.43	(0,0):42,(0,1):5,(1,0):6,(1,1):16	0:10,1:17	(0,0):66,(0,1):8,(1,0):11,(1,1):11	0:17,1:13	chr11	ENST00000377046.3	KAT5	A3SS	CDS	NA	no_diff
chr11:6502461:6502708:-@chr11:6501653|6501693:6501553:-	0.85	0.72	0.94	0.78	0.63	0.89	0.07	0.33	(0,0):93,(0,1):5,(1,0):37,(1,1):29	0:63,1:8	(0,0):81,(0,1):6,(1,0):29,(1,1):20	0:44,1:11	chr11	ENST00000254584.2	ARFIP2	A3SS	UTR5	IRES	no_diff
chr4:39460511:39460575:-@chr4:39460060|39460218:39460014:-	0.62	0.53	0.71	0.54	0.44	0.64	0.08	0.34	(0,0):1141,(0,1):26,(1,0):215	0:215,1:26	(0,0):891,(0,1):26,(1,0):157	0:157,1:26	chr4	ENST00000295955.9	RPL9	A3SS	UTR5	ConservedRegion,IRES	no_diff
chr4:99182527:99182720:+@chr4:99214556|99214559:99214666:+	0.26	0.11	0.5	0.24	0.13	0.39	0.02	0.33	(0,0):15,(0,1):12,(1,0):4,(1,1):10	0:6,1:20	(0,0):45,(0,1):32,(1,0):10,(1,1):40	0:19,1:63	chr4	ENST00000380158.4	RAP1GDS1	A3SS	CDS	NA	no_diff
chr8:75149443:75149538:-@chr8:75148990|75149270:75146935:-	0.77	0.5	0.95	0.7	0.49	0.88	0.07	0.48	(0,0):8,(0,1):1,(1,0):17,(1,1):101	0:79,1:40	(0,0):34,(0,1):2,(1,0):27,(1,1):233	0:173,1:89	chr8	ENST00000342232.4	JPH1	A3SS	UTR3	ConservedRegion,PAS	no_diff
chr8:99962884:99962983:+@chr8:99963747|99963829:99964328:+	0.33	0.14	0.7	0.34	0.14	0.65	-0.01	0.49	(0,0):11,(0,1):6,(1,0):5,(1,1):61	0:37,1:35	(0,0):17,(0,1):5,(1,0):4,(1,1):34	0:19,1:24	chr8	ENST00000297565.4	OSR2	A3SS	CDS	NA	no_diff
chrX:152721723:152721822:-@chrX:152721106|152721128:152721000:-	0.76	0.55	0.93	0.67	0.47	0.82	0.09	0.45	(0,0):426,(0,1):3,(1,0):22,(1,1):83	0:88,1:20	(0,0):454,(0,1):5,(1,0):22,(1,1):87	0:76,1:38	chrX	ENST00000330912.2	TREX2	A3SS	CDS	NA	no_diff
chrX:133527939:133527982:+@chrX:133547518|133547521:133547687:+	0.36	0.08	0.69	0.3	0.18	0.44	0.06	0.52	(0,0):57,(0,1):4,(1,0):2,(1,1):28	0:12,1:22	(0,0):210,(0,1):29,(1,0):13,(1,1):109	0:34,1:117	chrX	ENST00000370803.3	PHF6	A3SS	CDS	NA	no_diff
chrX:135579092:135579598:+@chrX:135579783|135579835:135580029:+	0.87	0.72	0.96	0.85	0.79	0.9	0.02	0.18	(0,0):52,(0,1):2,(1,0):21,(1,1):54	0:68,1:9	(0,0):262,(0,1):14,(1,0):116,(1,1):356	0:444,1:42	chrX	ENST00000535601.1	HTATSF1	A3SS	UTR5	IRES	no_diff
chr7:6628248:6630106:+@chr7:6631334|6631384:6631498:+	0.67	0.53	0.81	0.73	0.56	0.85	-0.06	0.3	(0,0):261,(0,1):7,(1,0):24,(1,1):555	0:451,1:135	(0,0):228,(0,1):7,(1,0):32,(1,1):509	0:405,1:143	chr7	ENST00000344417.5	C7orf26	A3SS	CDS	NA	no_diff
chr7:100490786:100492399:-@chr7:100490175|100490439:100489955:-	0.76	0.45	0.95	0.79	0.49	0.97	-0.03	0.43	(0,0):3,(1,0):8,(1,1):28	0:34,1:2	(0,0):7,(1,0):13,(1,1):85	0:81,1:17	chr7	ENST00000419336.2	ACHE	A3SS	CDS	NA	no_diff
chr18:12699829:12699904:-@chr18:12699164|12699202:12698978:-	0.72	0.44	0.93	0.72	0.56	0.86	0	0.38	(0,0):21,(0,1):1,(1,0):9,(1,1):14	0:19,1:5	(0,0):67,(0,1):6,(1,0):29,(1,1):62	0:72,1:25	chr18	ENST00000585331.1	RP11-973H7.2	A3SS	CDS	NA	no_diff
chr1:45800063:45800183:-@chr1:45799233|45799236:45799085:-	0.2	0.06	0.4	0.24	0.1	0.47	-0.04	0.36	(0,0):28,(0,1):18,(1,0):4,(1,1):23	0:9,1:36	(0,0):47,(0,1):12,(1,0):3,(1,1):33	0:13,1:35	chr1	ENST00000529984.1	MUTYH	A3SS	CDS	NA	no_diff
chr1:45477874:45478691:+@chr1:45478888|45478964:45479026:+	0.75	0.57	0.89	0.79	0.54	0.98	-0.04	0.44	(0,0):702,(0,1):4,(1,0):25,(1,1):146	0:130,1:45	(0,0):777,(1,0):13,(1,1):154	0:149,1:18	chr1	ENST00000246337.4	UROD	A3SS	CDS	ConservedRegion	no_diff
chr1:42776721:42776781:-@chr1:42744343|42744455:42744019:-	0.19	0.07	0.37	0.13	0.06	0.23	0.06	0.25	(0,0):15,(0,1):6,(1,0):4,(1,1):38	0:13,1:35	(0,0):39,(0,1):19,(1,0):8,(1,1):109	0:34,1:102	chr1	ENST00000372573.1	FOXJ3	A3SS	CDS	NA	no_diff
chr1:150921598:150921754:+@chr1:150921843|150921846:150922001:+	0.8	0.57	0.97	0.8	0.7	0.89	0	0.32	(0,0):20,(0,1):1,(1,0):9,(1,1):22	0:28,1:4	(0,0):87,(0,1):10,(1,0):47,(1,1):99	0:130,1:26	chr1	ENST00000271640.5	SETDB1	A3SS	CDS	NA	no_diff
chr1:2519969:2520064:+@chr1:2520361|2520393:2520479:+	0.5	0.35	0.64	0.44	0.3	0.58	0.06	0.3	(0,0):46,(0,1):15,(1,0):19,(1,1):4	0:21,1:17	(0,0):52,(0,1):19,(1,0):19,(1,1):4	0:21,1:21	chr1	ENST00000419916.2	FAM213B	A3SS	CDS	NA	no_diff
chr1:1370903:1371201:+@chr1:1372307|1372504:1372864:+	0.76	0.51	0.95	0.79	0.52	0.99	-0.03	0.43	(0,0):13,(1,0):14,(1,1):41	0:52,1:3	(0,0):25,(1,0):23,(1,1):85	0:88,1:20	chr1	ENST00000338660.5	VWA1	A3SS	CDS	NA	no_diff
chr1:143744201:143745467:-@chr1:143719833|143719955:143719747:-	0.47	0.21	0.72	0.44	0.25	0.67	0.03	0.41	(0,0):157,(0,1):4,(1,0):7,(1,1):82	0:52,1:41	(0,0):162,(0,1):6,(1,0):7,(1,1):69	0:44,1:38	chr1	ENST00000445753.1	BX284650.1	A3SS	UTR5	NA	no_diff
chr1:70671353:70671463:+@chr1:70687295|70687298:70687522:+	0.24	0.1	0.43	0.27	0.15	0.42	-0.03	0.35	(0,0):155,(0,1):14,(1,0):4,(1,1):58	0:19,1:57	(0,0):571,(0,1):27,(1,0):10,(1,1):190	0:64,1:163	chr1	ENST00000370951.1	SRSF11	A3SS	UTR5	ConservedRegion	no_diff
chr1:36643474:36643802:+@chr1:36644020|36644047:36644197:+	0.69	0.49	0.94	0.72	0.54	0.9	-0.03	0.36	(0,0):121,(0,1):3,(1,0):26,(1,1):419	0:300,1:148	(0,0):182,(0,1):3,(1,0):35,(1,1):520	0:495,1:63	chr1	ENST00000316156.4	MAP7D1	A3SS	CDS	NA	no_diff
chr1:44457446:44457676:+@chr1:44457825|44457992:44458059:+	0.85	0.63	0.99	0.87	0.68	0.99	-0.02	0.31	(0,0):22,(1,0):14,(1,1):8	00:22:00	(0,0):11,(1,0):16,(1,1):10	00:26:00	chr1	ENST00000486064.1	CCDC24	A3SS	CDS	NA	no_diff
chr1:33363727:33364090:-@chr1:33361344|33361570:33361156:-	0.85	0.7	0.96	0.87	0.72	0.97	-0.02	0.26	(0,0):129,(0,1):1,(1,0):104,(1,1):227	0:304,1:28	(0,0):107,(1,0):82,(1,1):183	0:245,1:20	chr1	ENST00000373463.3	TMEM54	A3SS	CDS	ConservedRegion,IRES	no_diff
chr1:155988061:155988159:-@chr1:155984854|155984864:155984752:-	0.83	0.66	0.95	0.85	0.6	0.99	-0.02	0.3	(0,0):1171,(0,1):3,(1,0):32,(1,1):217	0:202,1:50	(0,0):1114,(1,0):21,(1,1):202	0:195,1:28	chr1	ENST00000295702.4	SSR2	A3SS	CDS	NA	no_diff
chr1:111682660:111682955:-@chr1:111682288|111682333:111682210:-	0.54	0.31	0.78	0.61	0.41	0.79	-0.07	0.43	(0,0):43,(0,1):7,(1,0):10,(1,1):3	0:11,1:9	(0,0):93,(0,1):7,(1,0):16,(1,1):12	0:24,1:11	chr1	ENST00000286692.4	DRAM2	A3SS	UTR5	uORF,IRES	no_diff
chr1:111682660:111682955:-@chr1:111682288|111682336:111682123:-	0.39	0.2	0.62	0.48	0.28	0.68	-0.09	0.5	(0,0):45,(0,1):7,(1,0):7,(1,1):46	0:25,1:35	(0,0):83,(0,1):7,(1,0):12,(1,1):79	0:57,1:41	chr1	ENST00000286692.4	DRAM2	A3SS	UTR5	uORF,IRES	no_diff
chr1:44679104:44679199:+@chr1:44679335|44679381:44679530:+	0.35	0.22	0.49	0.31	0.2	0.42	0.04	0.26	(0,0):89,(0,1):22,(1,0):18,(1,1):47	0:36,1:51	(0,0):153,(0,1):31,(1,0):23,(1,1):76	0:38,1:92	chr1	ENST00000361745.6	DMAP1	A3SS	UTR5	IRES	no_diff
chr1:44457446:44457676:+@chr1:44457884|44457992:44458059:+	0.87	0.64	0.99	0.88	0.63	0.99	-0.01	0.28	(0,0):24,(1,0):12,(1,1):8	0:15,1:5	(0,0):12,(1,0):15,(1,1):10	00:25:00	chr1	ENST00000486064.1	CCDC24	A3SS	CDS	NA	no_diff
chr1:32852380:32852496:-@chr1:32849540|32849649:32849431:-	0.76	0.63	0.89	0.68	0.52	0.84	0.08	0.33	(0,0):248,(0,1):3,(1,0):76,(1,1):101	0:155,1:25	(0,0):292,(0,1):4,(1,0):77,(1,1):133	0:184,1:30	chr1	ENST00000455895.2	BSDC1	A3SS	CDS	NA	no_diff
chr1:155935094:155935203:-@chr1:155934919|155934922:155934779:-	0.68	0.44	0.85	0.66	0.57	0.75	0.02	0.34	(0,0):45,(0,1):6,(1,0):14,(1,1):28	0:24,1:24	(0,0):127,(0,1):32,(1,0):66,(1,1):131	0:148,1:81	chr1	ENST00000313695.7	ARHGEF2	A3SS	CDS	NA	no_diff
chr9:134357113:134357195:+@chr9:134357758|134357761:134357949:+	0.39	0.27	0.54	0.41	0.34	0.48	-0.02	0.23	(0,0):128,(0,1):25,(1,0):16,(1,1):92	0:42,1:91	(0,0):422,(0,1):112,(1,0):83,(1,1):315	0:187,1:323	chr9	ENST00000405995	ENSG00000130723	A3SS	CDS	NA	no_diff
chr9:34401664:34401718:-@chr9:34401117|34401120:34398188:-	0.66	0.48	0.84	0.66	0.52	0.77	0	0.3	(0,0):95,(0,1):9,(1,0):20,(1,1):1694	0:576,1:1147	(0,0):90,(0,1):15,(1,0):32,(1,1):1789	0:1347,1:489	chr9	ENST00000379080.1	FAM219A	A3SS	CDS	NA	no_diff
chr9:131038425:131038681:+@chr9:131038866|131038986:131039034:+	0.27	0.2	0.35	0.24	0.16	0.34	0.03	0.18	(0,0):157,(0,1):54,(1,0):41,(1,1):81	0:62,1:114	(0,0):97,(0,1):36,(1,0):23,(1,1):51	0:29,1:81	chr9	ENST00000320188.4	SWI5	A3SS	CDS	NA	no_diff
chr20:44984441:44984595:-@chr20:44983817|44983918:44983712:-	0.72	0.58	0.86	0.73	0.62	0.84	-0.01	0.26	(0,0):262,(0,1):10,(1,0):60,(1,1):44	0:94,1:20	(0,0):244,(0,1):10,(1,0):59,(1,1):30	0:82,1:17	chr20	ENST00000317734.8	SLC35C2	A3SS	CDS	ConservedRegion	no_diff
chr17:27042474:27042525:-@chr17:27042232|27042294:27042213:-	0.43	0.02	0.91	0.46	0.09	0.81	-0.03	0.69	(0,0):824,(1,0):298	0.206944	(0,0):554,(1,0):224	0.155556	chr17	ENST00000395243.3	RAB34	A3SS	CDS	NA	no_diff
chr17:8113272:8113567:-@chr17:8111158|8111219:8111056:-	0.61	0.35	0.83	0.69	0.46	0.9	-0.08	0.51	(0,0):824,(0,1):1,(1,0):15,(1,1):109	0:109,1:16	(0,0):899,(0,1):2,(1,0):21,(1,1):120	0:98,1:45	chr17	ENST00000316199.6	AURKB	A3SS	CDS	NA	no_diff
chr17:42400652:42400711:-@chr17:42399896|42399920:42399787:-	0.45	0.34	0.56	0.44	0.31	0.59	0.01	0.24	(0,0):1782,(0,1):14,(1,0):50,(1,1):325	0:174,1:215	(0,0):1212,(0,1):7,(1,0):31,(1,1):230	0:118,1:150	chr17	ENST00000225308.8	SLC25A39	A3SS	CDS	NA	no_diff
chr10:104178941:104179171:+@chr10:104179668|104180809:104180939:+	0.8	0.56	0.98	0.78	0.5	1	0.02	0.5	(0,0):41,(1,0):52,(1,1):14	0:63,1:3	(0,0):25,(1,0):26,(1,1):7	0:30,1:3	chr10	ENST00000406432.1	PSD	A3SS	UTR3	ConservedRegion,IRES,uORF,MIRc,L2a	no_diff
chr10:88820672:88820809:-@chr10:88819998|88820582:88819918:-	0.57	0.43	0.72	0.54	0.46	0.64	0.03	0.23	(0,0):195,(1,0):191,(1,1):86	0:251,1:26	(0,0):672,(1,0):486,(1,1):225	0:595,1:116	chr10	ENST00000277865.4	GLUD1	A3SS	CDS	BRD-BOX,L1MB8,UNR-bs	no_diff
chr16:2127406:2127727:+@chr16:2129033|2129036:2129197:+	0.78	0.36	0.97	0.69	0.49	0.85	0.09	0.57	(0,0):47,(1,0):4,(1,1):30	0:31,1:3	(0,0):203,(0,1):7,(1,0):17,(1,1):156	0:112,1:68	chr16	ENST00000382538.6	TSC2	A3SS	CDS	NA	no_diff
chr16:4847939:4847988:-@chr16:4847841|4847862:4847715:-	0.16	0.08	0.27	0.25	0.13	0.4	-0.09	0.38	(0,0):117,(0,1):29,(1,0):7,(1,1):39	0:14,1:61	(0,0):112,(0,1):22,(1,0):10,(1,1):37	0:20,1:49	chr16	ENST00000322048.7	ROGDI	A3SS	CDS	NA	no_diff
chr16:3162563:3162683:+@chr16:3163350|3163418:3163488:+	0.42	0.25	0.62	0.46	0.3	0.65	-0.04	0.39	(0,0):129,(0,1):11,(1,0):13,(1,1):1	0:14,1:11	(0,0):130,(0,1):11,(1,0):16,(1,1):6	0:17,1:16	chr16	ENST00000572691.1	RP11-473M20.15	A3SS	UTR3	IRES	no_diff
chr16:3074182:3074287:-@chr16:3073969|3073989:3073848:-	0.55	0.3	0.78	0.51	0.23	0.82	0.04	0.55	(0,0):328,(0,1):5,(1,0):11,(1,1):59	0:42,1:33	(0,0):242,(0,1):1,(1,0):5,(1,1):65	0:58,1:13	chr16	ENST00000248089.3	HCFC1R1	A3SS	UTR5	NA	no_diff
chr5:176917871:176917929:-@chr5:176917032|176917594:176916772:-	0.74	0.58	0.9	0.7	0.52	0.88	0.04	0.33	(0,0):340,(0,1):5,(1,0):105,(1,1):34	0:121,1:23	(0,0):265,(0,1):2,(1,0):84,(1,1):40	0:110,1:16	chr5	ENST00000493815.1	PDLIM7	A3SS	CDS	ConservedRegion,PAS	no_diff
chr5:137667284:137667560:-@chr5:137666903|137666907:137666676:-	0.6	0.41	0.75	0.56	0.4	0.72	0.04	0.34	(0,0):25,(0,1):11,(1,0):18,(1,1):94	0:87,1:36	(0,0):38,(0,1):12,(1,0):17,(1,1):155	0:111,1:73	chr5	ENST00000323760.6	CDC25C	A3SS	UTR5	NA	no_diff
chr5:132099916:132100111:-@chr5:132099578|132099584:132099398:-	0.75	0.61	0.86	0.75	0.67	0.83	0	0.21	(0,0):119,(0,1):12,(1,0):41,(1,1):190	0:177,1:66	(0,0):241,(0,1):25,(1,0):86,(1,1):411	0:371,1:151	chr5	ENST00000378719.2	2013-09-08	A3SS	CDS	NA	no_diff
chr5:175812222:175812328:-@chr5:175811284|175811375:175810949:-	0.81	0.75	0.86	0.89	0.83	0.94	-0.08	0.88	(0,0):379,(0,1):34,(1,0):270,(1,1):444	0:638,1:110	(0,0):270,(0,1):14,(1,0):210,(1,1):289	0:482,1:31	chr5	ENST00000510123.1	NOP16	A3SS	CDS	NA	no_diff
chr3:49155380:49155553:-@chr3:49155218|49155263:49155090:-	0.64	0.41	0.84	0.57	0.46	0.69	0.07	0.41	(0,0):26,(0,1):4,(1,0):12,(1,1):19	0:24,1:11	(0,0):102,(0,1):27,(1,0):55,(1,1):114	0:117,1:79	chr3	ENST00000398896.1	USP19	A3SS	CDS	NA	no_diff
chr3:178745211:178745311:-@chr3:178743013|178743016:178741527:-	0.48	0.26	0.7	0.48	0.29	0.69	0	0.43	(0,0):16,(0,1):6,(1,0):6,(1,1):127	0:41,1:98	(0,0):31,(0,1):14,(1,0):13,(1,1):258	0:99,1:186	chr3	ENST00000311417.2	ZMAT3	A3SS	CDS	NA	no_diff
chr3:9854932:9855029:+@chr3:9859329|9860239:9860604:+	0.57	0.3	0.88	0.65	0.48	0.83	-0.08	0.55	(0,0):90,(1,0):22,(1,1):18	0:36,1:4	(0,0):165,(1,0):62,(1,1):42	0:97,1:7	chr3	ENST00000427220.1	TTLL3	A3SS	CDS	NA	no_diff
chr3:9798451:9798500:+@chr3:9798728|9798745:9798875:+	0.22	0.09	0.42	0.18	0.04	0.4	0.04	0.37	(0,0):175,(0,1):12,(1,0):4,(1,1):40	0:15,1:41	(0,0):113,(0,1):11,(1,0):2,(1,1):23	0:10,1:26	chr3	ENST00000302003.7	OGG1	A3SS	CDS	ConservedRegion	no_diff
chr3:48225290:48225326:-@chr3:48224517|48224520:48224419:-	0.72	0.54	0.87	0.64	0.51	0.78	0.08	0.38	(0,0):126,(0,1):6,(1,0):19,(1,1):29	0:38,1:16	(0,0):147,(0,1):15,(1,0):31,(1,1):42	0:66,1:22	chr3	ENST00000302506.3	CDC25A	A3SS	CDS	NA	no_diff
chr14:100842597:100843142:-@chr14:100841743|100841883:100841620:-	0.82	0.55	0.97	0.76	0.56	0.91	0.06	0.5	(0,0):125,(1,0):9,(1,1):15	00:24:00	(0,0):155,(0,1):3,(1,0):18,(1,1):25	0:40,1:6	chr14	ENST00000392882.2	WARS	A3SS	UTR5	IRES,uORF	no_diff
chr14:24583353:24584133:+@chr14:24584724|24584752:24584935:+	0.4	0.23	0.6	0.32	0.15	0.55	0.08	0.44	(0,0):237,(0,1):13,(1,0):10,(1,1):113	0:61,1:75	(0,0):233,(0,1):13,(1,0):7,(1,1):101	0:51,1:70	chr14	ENST00000559115.1	DCAF11	A3SS	UTR5	ConservedRegion	no_diff
chr14:31602444:31602620:-@chr14:31598513|31598654:31597818:-	0.72	0.42	0.91	0.74	0.66	0.8	-0.02	0.32	(0,0):10,(0,1):2,(1,0):13,(1,1):45	0:51,1:9	(0,0):251,(0,1):25,(1,0):194,(1,1):852	0:808,1:263	chr14	ENST00000553957.1	HECTD1	A3SS	CDS	NA	no_diff
chr14:24583353:24584133:+@chr14:24584724|24584752:24584958:+	0.4	0.23	0.58	0.33	0.12	0.57	0.07	0.47	(0,0):238,(0,1):13,(1,0):10,(1,1):130	0:71,1:82	(0,0):243,(0,1):13,(1,0):7,(1,1):106	0:58,1:68	chr14	ENST00000559115.1	DCAF11	A3SS	UTR5	ConservedRegion	no_diff
chr14:24584494:24584601:+@chr14:24584724|24584752:24584958:+	0.46	0.24	0.69	0.45	0.21	0.74	0.01	0.41	(0,0):182,(0,1):4,(1,0):10,(1,1):123	0:85,1:52	(0,0):195,(0,1):3,(1,0):7,(1,1):95	0:32,1:73	chr14	ENST00000559115.1	DCAF11	A3SS	UTR5	ConservedRegion	no_diff
chr2:74781214:74781941:+@chr2:74782281|74782283:74782580:+	0.81	0.61	0.95	0.83	0.62	0.98	-0.02	0.3	(0,0):20,(0,1):2,(1,0):11,(1,1):72	0:69,1:16	(0,0):23,(0,1):1,(1,0):10,(1,1):87	0:76,1:22	chr2	ENST00000409429.1	DOK1	A3SS	CDS	IRES	no_diff
chr2:114346127:114346280:+@chr2:114352627|114352640:114352738:+	0.22	0.08	0.46	0.21	0.06	0.46	0.01	0.4	(0,0):175,(0,1):13,(1,0):3,(1,1):18	0:7,1:27	(0,0):260,(0,1):11,(1,0):3,(1,1):16	0:9,1:21	chr2	ENST00000326632	ENSG00000146556	A3SS	UTR3	NA	no_diff
chr2:71299771:71300724:+@chr2:71302685|71303734:71303831:+	0.83	0.66	0.96	0.88	0.75	0.98	-0.05	0.27	(0,0):334,(1,0):104,(1,1):111	0:209,1:6	(0,0):431,(0,1):1,(1,0):144,(1,1):126	0:258,1:13	chr2	ENST00000244204.5	NAGK	A3SS	CDS	ConservedRegion,K-BOX	no_diff
chr2:68274305:68274472:-@chr2:68273243|68273542:68273120:-	0.5	0.37	0.67	0.57	0.43	0.73	-0.07	0.33	(0,0):219,(1,0):79,(1,1):119	0:145,1:53	(0,0):225,(1,0):87,(1,1):115	0:147,1:55	chr2	ENST00000355848.3	C1D	A3SS	CDS	NA	no_diff
chr2:85581516:85581952:+@chr2:85582199|85584090:85584375:+	0.43	0.31	0.59	0.48	0.36	0.62	-0.05	0.29	(0,0):60,(0,1):2,(1,0):76,(1,1):59	0:100,1:37	(0,0):79,(0,1):1,(1,0):104,(1,1):76	0:146,1:35	chr2	ENST00000409013.3	ELMOD3	A3SS	UTR5	ConservedRegion,AluYc,uORF,AluSg	no_diff
chr2:219520873:219521195:-@chr2:219516545|219516794:219516424:-	0.52	0.31	0.8	0.51	0.37	0.7	0.01	0.42	(0,0):100,(0,1):1,(1,0):19,(1,1):53	0:45,1:28	(0,0):210,(0,1):2,(1,0):52,(1,1):148	0:117,1:85	chr2	ENST00000449707.1	ZNF142	A3SS	CDS	NA	no_diff
chr2:223161697:223162261:-@chr2:223160373|223160376:223160247:-	0.65	0.35	0.85	0.72	0.56	0.86	-0.07	0.48	(0,0):25,(0,1):3,(1,0):6,(1,1):29	0:33,1:5	(0,0):52,(0,1):7,(1,0):19,(1,1):59	0:64,1:21	chr2	ENST00000344493.4	PAX3	A3SS	CDS	NA	no_diff
chr2:71297430:71297969:+@chr2:71299771|71300612:71300724:+	0.16	0.11	0.23	0.19	0.14	0.26	-0.03	0.15	(0,0):601,(0,1):1,(1,0):31,(1,1):137	0:47,1:122	(0,0):796,(1,0):44,(1,1):161	0:70,1:135	chr2	ENST00000244204.5	NAGK	A3SS	CDS	NA	no_diff
chr6:31499073:31503262:-@chr6:31498955|31498958:31498830:-	0.46	0.3	0.63	0.38	0.26	0.52	0.08	0.35	(0,0):3868,(0,1):18,(1,0):16,(1,1):5124	0:2056,1:3102	(0,0):4558,(0,1):30,(1,0):19,(1,1):8646	0:3149,1:5546	chr6	ENST00000458640.1	DDX39B	A3SS	CDS	SF2	no_diff
chr6:41554747:41554894:+@chr6:41555037|41555040:41555250:+	0.75	0.57	0.89	0.69	0.56	0.82	0.06	0.34	(0,0):157,(0,1):7,(1,0):25,(1,1):146	0:129,1:49	(0,0):180,(0,1):13,(1,0):32,(1,1):209	0:206,1:48	chr6	ENST00000373063.3	FOXP4	A3SS	CDS	NA	no_diff
chr6:44193435:44193904:+@chr6:44194997|44195000:44195079:+	0.51	0.29	0.71	0.54	0.31	0.73	-0.03	0.39	(0,0):236,(0,1):8,(1,0):8,(1,1):16	0:15,1:17	(0,0):285,(0,1):11,(1,0):14,(1,1):14	0:24,1:15	chr6	ENST00000393844.1	SLC29A1	A3SS	UTR3	NA	no_diff
chr6:28317691:28317844:+@chr6:28327302|28329101:28329248:+	0.46	0.23	0.85	0.48	0.31	0.67	-0.02	0.47	(0,0):36,(0,1):1,(1,0):44,(1,1):13	0:47,1:11	(0,0):69,(0,1):2,(1,0):88,(1,1):21	0:101,1:10	chr6	ENST00000252211.2	ZKSCAN3	A3SS	UTR3	SF2,IRES	no_diff
chr6:43484465:43484728:-@chr6:43483851|43483925:43483627:-	0.24	0.17	0.32	0.2	0.13	0.28	0.04	0.17	(0,0):542,(1,0):41,(1,1):986	0:262,1:765	(0,0):426,(1,0):28,(1,1):793	0:155,1:666	chr6	ENST00000372422.2	YIPF3	A3SS	CDS	NA	no_diff
chr6:43484465:43484728:-@chr6:43483851|43483928:43483627:-	0.19	0.13	0.26	0.17	0.11	0.25	0.02	0.13	(0,0):550,(1,0):33,(1,1):986	0:177,1:842	(0,0):430,(1,0):24,(1,1):793	0:187,1:630	chr6	ENST00000372422.2	YIPF3	A3SS	CDS	NA	no_diff
chr22:42377649:42377840:+@chr22:42383626|42383757:42383763:+	0.67	0.34	0.92	0.73	0.47	0.94	-0.06	0.55	(0,0):86,(1,0):13,(1,1):18	0:27,1:4	(0,0):114,(1,0):27,(1,1):32	0:54,1:5	chr22	ENST00000396426.3	2013-09-03	A3SS	CDS	NA	no_diff
chr22:26868268:26868384:-@chr22:26867256|26867354:26867179:-	0.65	0.38	0.9	0.6	0.36	0.89	0.05	0.56	(0,0):48,(1,0):9,(1,1):16	0:17,1:8	(0,0):59,(0,1):2,(1,0):13,(1,1):17	0:25,1:7	chr22	ENST00000398145.2	HPS4	A3SS	CDS	NA	no_diff
chr22:39712711:39713634:-@chr22:39711533|39711536:39711374:-	0.72	0.43	0.91	0.65	0.46	0.84	0.07	0.6	(0,0):7582,(0,1):1,(1,0):15,(1,1):5755	0:4178,1:1593	(0,0):8118,(0,1):2,(1,0):18,(1,1):6100	0:4477,1:1643	chr22	ENST00000216146.4	RPL3	A3SS	CDS	SF2	no_diff
chr15:59358963:59359282:+@chr15:59368153|59368156:59368414:+	0.55	0.3	0.82	0.51	0.35	0.68	0.04	0.44	(0,0):7,(0,1):4,(1,0):6,(1,1):32	0:23,1:19	(0,0):56,(0,1):13,(1,0):15,(1,1):163	0:85,1:106	chr15	ENST00000348370.4	RNF111	A3SS	CDS	NA	no_diff
chr15:80215794:80216104:-@chr15:80200026|80200048:80199971:-	0.23	0.11	0.37	0.32	0.15	0.52	-0.09	0.39	(0,0):234,(0,1):20,(1,0):7,(1,1):105	0:32,1:100	(0,0):449,(0,1):9,(1,0):6,(1,1):96	0:43,1:68	chr15	ENST00000478497.1	ST20	A3SS	UTR5	AluSq2,AluSx	no_diff
chr15:91455083:91455509:+@chr15:91455747|91455772:91455894:+	0.06	0.01	0.18	0.14	0.06	0.25	-0.08	0.37	(0,0):44,(0,1):19,(1,1):47	0:3,1:63	(0,0):88,(0,1):44,(1,0):8,(1,1):140	0:30,1:162	chr15	ENST00000560451.1	MAN2A2	A3SS	CDS	ConservedRegion	no_diff
chr19:51142282:51142563:-@chr19:51140683|51141047:51140521:-	0.33	0.13	0.65	0.55	0.27	0.9	-0.22	0.85	(0,0):19,(0,1):5,(1,0):6,(1,1):9	0:9,1:11	(0,0):24,(0,1):2,(1,0):9,(1,1):13	0:13,1:11	chr19	ENST00000338916.3	SYT3	A3SS	UTR5	NA	no_diff
chr19:14522318:14522410:-@chr19:14521948|14521951:14521801:-	0.79	0.56	0.93	0.64	0.34	0.89	0.15	0.77	(0,0):981,(0,1):1,(1,0):13,(1,1):348	0:313,1:49	(0,0):966,(0,1):1,(1,0):7,(1,1):303	0:285,1:26	chr19	ENST00000589318.1	DDX39A	A3SS	CDS	NA	no_diff
chr19:7459999:7460133:+@chr19:7505075|7505230:7505368:+	0.3	0.12	0.53	0.45	0.31	0.61	-0.15	0.63	(0,0):23,(0,1):6,(1,0):7,(1,1):16	0:16,1:13	(0,0):55,(0,1):12,(1,0):25,(1,1):22	0:38,1:21	chr19	ENST00000319670.8	ARHGEF18	A3SS	CDS	NA	no_diff
chr19:6759605:6759681:-@chr19:6754943|6755326:6754842:-	0.61	0.38	0.86	0.81	0.51	0.98	-0.2	0.99	(0,0):23,(0,1):3,(1,0):29,(1,1):4	0:32,1:4	(0,0):17,(0,1):1,(1,0):33,(1,1):2	0:34,1:2	chr19	ENST00000245908.5	SH2D3A	A3SS	CDS	NA	no_diff
chr19:46366316:46366548:-@chr19:46357758|46357843:46357649:-	0.79	0.56	0.96	0.58	0.38	0.83	0.21	0.93	(0,0):162,(0,1):1,(1,0):12,(1,1):16	0:26,1:3	(0,0):441,(0,1):2,(1,0):22,(1,1):95	0:71,1:48	chr19	ENST00000245934.7	SYMPK	A3SS	UTR5	NA	no_diff
chr19:39389019:39389065:-@chr19:39384507|39384611:39384459:-	0.14	0.06	0.26	0.29	0.16	0.46	-0.15	0.8	(0,0):549,(0,1):16,(1,0):14	0:14,1:16	(0,0):586,(0,1):10,(1,0):21	0:21,1:10	chr19	ENST00000479290.1	SIRT2	A3SS	CDS	NA	no_diff
chr12:6657591:6657711:-@chr12:6657323|6657326:6657231:-	0.53	0.32	0.72	0.68	0.54	0.82	-0.15	0.65	(0,0):62,(0,1):11,(1,0):12,(1,1):16	0:20,1:19	(0,0):112,(0,1):10,(1,0):23,(1,1):38	0:56,1:15	chr12	ENST00000336604.4	IFFO1	A3SS	CDS	NA	no_diff
chr12:1025805:1025986:-@chr12:1025649|1025701:1025510:-	0.19	0.04	0.43	0.29	0.15	0.45	-0.1	0.48	(0,0):24,(0,1):9,(1,0):2,(1,1):17	0:7,1:21	(0,0):44,(0,1):18,(1,0):10,(1,1):41	0:30,1:39	chr12	ENST00000358495.3	RAD52	A3SS	CDS	NA	no_diff
chr12:57998406:57998641:+@chr12:57999127|57999354:57999514:+	0.34	0.24	0.44	0.48	0.35	0.62	-0.14	0.8	(0,0):68,(0,1):24,(1,0):39,(1,1):82	0:73,1:72	(0,0):65,(0,1):15,(1,0):45,(1,1):67	0:88,1:39	chr12	ENST00000549583.1	DTX3	A3SS	UTR5	NA	no_diff
chr12:132588542:132588715:+@chr12:132588923|132589112:132589849:+	0.7	0.44	0.91	0.89	0.77	0.98	-0.19	0.67	(0,0):9,(0,1):2,(1,0):12,(1,1):37	0:40,1:11	(0,0):50,(0,1):2,(1,0):44,(1,1):111	0:140,1:17	chr12	ENST00000446190.1	EP400NL	A3SS	UTR3	NA	no_diff
chr12:49580390:49580616:-@chr12:49580235|49580241:49580093:-	0.91	0.73	0.99	0.76	0.51	0.95	0.15	0.51	(0,0):574,(1,0):20,(1,1):514	0:530,1:4	(0,0):1789,(1,0):21,(1,1):1462	0:1316,1:167	chr12	ENST00000301071.7	TUBA1A	A3SS	CDS	NA	no_diff
chr12:53896811:53896996:+@chr12:53897497|53897514:53897592:+	0.71	0.54	0.88	0.59	0.37	0.8	0.12	0.49	(0,0):346,(0,1):7,(1,0):22,(1,1):45	0:61,1:13	(0,0):257,(0,1):6,(1,0):13,(1,1):48	0:49,1:18	chr12	ENST00000550147.1	TARBP2	A3SS	CDS	NA	no_diff
chr12:120636657:120636803:-@chr12:120636434|120636437:120636357:-	0.57	0.47	0.67	0.69	0.58	0.8	-0.12	0.7	(0,0):11982,(0,1):27,(1,0):69,(1,1):2741	0:1561,1:1276	(0,0):9966,(0,1):15,(1,0):65,(1,1):2234	0:1496,1:818	chr12	ENST00000392514.4	RPLP0	A3SS	CDS	NA	no_diff
chr12:14576519:14578407:+@chr12:14587271|14587274:14587357:+	0.64	0.24	0.98	0.88	0.78	0.95	-0.24	0.69	(0,0):5,(1,0):2,(1,1):55	0:42,1:15	(0,0):79,(0,1):5,(1,0):41,(1,1):821	0:819,1:48	chr12	ENST00000539659.1	ATF7IP	A3SS	CDS	NA	no_diff
chr11:118962110:118962236:+@chr11:118962835|118963114:118963233:+	0.31	0.21	0.44	0.41	0.3	0.56	-0.1	0.41	(0,0):187,(1,0):42,(1,1):86	0:67,1:61	(0,0):279,(0,1):1,(1,0):69,(1,1):107	0:100,1:77	chr11	ENST00000545621.1	HMBS	A3SS	CDS	NA	no_diff
chr11:18108413:18108601:-@chr11:18105275|18105278:18105082:-	0.62	0.44	0.77	0.78	0.67	0.88	-0.16	0.75	(0,0):71,(0,1):10,(1,0):18,(1,1):98	0:79,1:47	(0,0):132,(0,1):10,(1,0):41,(1,1):180	0:176,1:55	chr11	ENST00000524803.1	SAAL1	A3SS	CDS	NA	no_diff
chr11:47282792:47283000:+@chr11:47283098|47283470:47283569:+	0.46	0.31	0.64	0.62	0.42	0.82	-0.16	0.71	(0,0):52,(0,1):2,(1,0):40,(1,1):53	0:67,1:28	(0,0):41,(0,1):3,(1,0):40,(1,1):29	0:66,1:6	chr11	ENST00000527464.1	NR1H3	A3SS	CDS	NA	no_diff
chr11:62438712:62439012:-@chr11:62437487|62437637:62437354:-	0.63	0.33	0.94	0.52	0.31	0.74	0.11	0.76	(0,0):61,(1,0):8,(1,1):33	0:39,1:2	(0,0):126,(0,1):1,(1,0):14,(1,1):57	0:48,1:24	chr11	ENST00000354588.3	C11orf48	A3SS	UTR5	NA	no_diff
chr8:38245468:38245548:+@chr8:38250060|38250131:38250513:+	0.49	0.07	0.93	0.68	0.43	0.91	-0.19	0.94	(0,0):9,(0,1):1,(1,0):2,(1,1):20	0:10,1:13	(0,0):16,(0,1):3,(1,0):14,(1,1):33	0:36,1:14	chr8	ENST00000519476.2	LETM2	A3SS	UTR3	NA	no_diff
chrX:154444550:154444852:+@chrX:154448440|154448464:154448584:+	0.35	0.15	0.58	0.25	0.12	0.46	0.1	0.44	(0,0):404,(0,1):2,(1,0):6,(1,1):228	0:122,1:114	(0,0):485,(0,1):8,(1,0):6,(1,1):241	0:93,1:162	chrX	ENST00000535916.1	VBP1	A3SS	CDS	NA	no_diff
chr7:66057244:66057395:-@chr7:66041916|66041919:66041742:-	0.81	0.6	0.93	0.63	0.31	0.95	0.18	0.62	(0,0):177,(0,1):2,(1,0):13,(1,1):38	0:44,1:9	(0,0):205,(0,1):2,(1,0):5,(1,1):41	0:25,1:23	chr7	ENST00000445080	ENSG00000232559	A3SS	UTR5	NA	no_diff
chr7:75044398:75044512:+@chr7:75044870|75045259:75045469:+	0.42	0.19	0.82	0.26	0.14	0.41	0.16	0.58	(0,0):14,(1,0):10,(1,1):19	0:17,1:12	(0,0):14,(1,0):16,(1,1):45	0:29,1:32	chr7	ENST00000422386.1	NSUN5P1	A3SS	UTR3	NA	no_diff
chr18:48500767:48500931:+@chr18:48510466|48510857:48510933:+	0.38	0.26	0.53	0.5	0.38	0.64	-0.12	0.52	(0,0):27,(0,1):12,(1,0):38,(1,1):17	0:44,1:23	(0,0):38,(0,1):12,(1,0):84,(1,1):40	0:102,1:34	chr18	ENST00000269466.3	ELAC1	A3SS	CDS	NA	no_diff
chr18:11886916:11887024:-@chr18:11886620|11886777:11886498:-	0.43	0.2	0.69	0.32	0.15	0.56	0.11	0.52	(0,0):38,(0,1):3,(1,0):9,(1,1):13	0:12,1:13	(0,0):46,(0,1):6,(1,0):11,(1,1):20	0:18,1:19	chr18	ENST00000588072.1	MPPE1	A3SS	CDS	NA	no_diff
chr1:231374603:231374934:-@chr1:231364952|231364955:231364896:-	0.69	0.56	0.8	0.79	0.7	0.87	-0.1	0.44	(0,0):165,(0,1):14,(1,0):33,(1,1):129	0:134,1:42	(0,0):243,(0,1):14,(1,0):61,(1,1):220	0:252,1:43	chr1	ENST00000366649.2	C1orf131	A3SS	CDS	NA	no_diff
chr1:114301645:114302101:-@chr1:114301355|114301470:114301281:-	0.77	0.63	0.89	0.64	0.52	0.76	0.13	0.7	(0,0):46,(0,1):7,(1,0):42,(1,1):41	0:76,1:14	(0,0):81,(0,1):17,(1,0):50,(1,1):64	0:90,1:41	chr1	ENST00000393357.2	PHTF1	A3SS	UTR5	NA	no_diff
chr1:3659625:3659754:-@chr1:3659475|3659521:3659368:-	0.38	0.26	0.52	0.27	0.17	0.37	0.11	0.52	(0,0):148,(0,1):24,(1,0):23,(1,1):41	0:40,1:48	(0,0):206,(0,1):34,(1,0):21,(1,1):68	0:38,1:85	chr1	ENST00000418088.1	TP73-AS1	A3SS	UTR5	NA	no_diff
chr1:898084:898297:+@chr1:898412|898489:898633:+	0.6	0.21	0.91	0.45	0.24	0.68	0.15	0.81	(0,0):32,(0,1):2,(1,0):6,(1,1):21	0:13,1:16	(0,0):46,(0,1):7,(1,0):10,(1,1):27	0:21,1:23	chr1	ENST00000338591.3	KLHL17	A3SS	CDS	NA	no_diff
chr1:53370318:53372605:-@chr1:53363156|53364896:53363109:-	0.52	0.39	0.66	0.67	0.56	0.78	-0.15	0.77	(0,0):277,(1,0):71,(1,1):180	0:157,1:94	(0,0):450,(0,1):2,(1,0):201,(1,1):382	0:472,1:113	chr1	ENST00000371522.4	ECHDC2	A3SS	CDS	NA	no_diff
chr1:15851347:15851412:-@chr1:15844790|15844890:15844605:-	0.85	0.62	0.99	0.72	0.41	0.96	0.13	0.58	(0,0):49,(1,0):22,(1,1):30	00:52:00	(0,0):66,(1,0):15,(1,1):37	0:47,1:5	chr1	ENST00000333868.5	CASP9	A3SS	CDS	NA	no_diff
chr1:150978788:150980095:-@chr1:150975182|150975444:150974641:-	0.42	0.2	0.66	0.56	0.35	0.78	-0.14	0.65	(0,0):55,(0,1):5,(1,0):9,(1,1):87	0:33,1:68	(0,0):74,(0,1):3,(1,0):16,(1,1):144	0:99,1:64	chr1	ENST00000312210.5	FAM63A	A3SS	CDS	NA	no_diff
chr9:116139009:116139291:-@chr9:116137806|116137847:116137733:-	0.64	0.44	0.82	0.81	0.65	0.93	-0.17	0.83	(0,0):100,(0,1):7,(1,0):18,(1,1):29	0:25,1:29	(0,0):89,(0,1):2,(1,0):20,(1,1):32	0:42,1:12	chr9	ENST00000238379.5	HDHD3	A3SS	UTR5	NA	no_diff
chr9:123555165:123555535:-@chr9:123550464|123550556:123550047:-	0.68	0.49	0.88	0.52	0.36	0.69	0.16	0.7	(0,0):96,(0,1):2,(1,0):28,(1,1):271	0:176,1:125	(0,0):169,(0,1):5,(1,0):28,(1,1):327	0:225,1:135	chr9	ENST00000373926.3	FBXW2	A3SS	UTR5	NA	no_diff
chr9:32988081:32988127:-@chr9:32987729|32987844:32987542:-	0.62	0.48	0.76	0.72	0.6	0.84	-0.1	0.37	(0,0):236,(0,1):9,(1,0):71,(1,1):105	0:143,1:42	(0,0):216,(0,1):9,(1,0):93,(1,1):104	0:166,1:40	chr9	ENST00000379825.2	APTX	A3SS	CDS	NA	no_diff
chr9:84228292:84228437:-@chr9:84226871|84226874:84226684:-	0.68	0.43	0.89	0.86	0.75	0.94	-0.18	0.64	(0,0):33,(0,1):3,(1,0):8,(1,1):41	0:43,1:9	(0,0):52,(0,1):6,(1,0):42,(1,1):96	0:127,1:17	chr9	ENST00000376499.3	TLE1	A3SS	CDS	NA	no_diff
chr20:25187158:25187226:+@chr20:25187712|25187715:25188033:+	0.55	0.33	0.78	0.65	0.47	0.82	-0.1	0.47	(0,0):89,(0,1):6,(1,0):8,(1,1):96	0:71,1:39	(0,0):74,(0,1):7,(1,0):13,(1,1):94	0:71,1:43	chr20	ENST00000354989.5	ENTPD6	A3SS	CDS	NA	no_diff
chr20:35402065:35402304:-@chr20:35399596|35399876:35399276:-	0.22	0.11	0.36	0.34	0.25	0.45	-0.12	0.58	(0,0):125,(0,1):3,(1,0):13,(1,1):106	0:34,1:88	(0,0):302,(0,1):13,(1,0):47,(1,1):187	0:92,1:155	chr20	ENST00000426836.1	DSN1	A3SS	UTR5	NA	no_diff
chr20:30310421:30311332:-@chr20:30310133|30310151:30309458:-	0.2	0.07	0.42	0.38	0.21	0.57	-0.18	0.84	(0,0):59,(0,1):14,(1,0):3,(1,1):441	0:147,1:311	(0,0):54,(0,1):10,(1,0):7,(1,1):401	0:175,1:243	chr20	ENST00000376062.2	BCL2L1	A3SS	UTR5	NA	no_diff
chr20:37054583:37054700:-@chr20:37049745|37050888:37049653:-	0.43	0.3	0.59	0.57	0.39	0.79	-0.14	0.52	(0,0):453,(1,0):149,(1,1):43	0:164,1:28	(0,0):463,(1,0):171,(1,1):39	0:194,1:16	chr20	ENST00000449469.1	RP4-564F22.2	A3SS	UTR3	NA	no_diff
chr17:76120970:76121066:-@chr17:76120736|76120862:76120605:-	0.64	0.41	0.85	0.75	0.51	0.92	-0.11	0.59	(0,0):22,(0,1):3,(1,0):14,(1,1):5	0:17,1:5	(0,0):25,(0,1):1,(1,0):13,(1,1):6	0:16,1:4	chr17	ENST00000392467.3	TMC6	A3SS	CDS	NA	no_diff
chr17:66244145:66244227:+@chr17:66244751|66244781:66244846:+	0.49	0.32	0.65	0.37	0.2	0.54	0.12	0.55	(0,0):557,(0,1):12,(1,0):16	0:16,1:12	(0,0):600,(0,1):14,(1,0):11	0:11,1:14	chr17	ENST00000359904.3	AMZ2	A3SS	UTR5	NA	no_diff
chr17:52978052:52978284:+@chr17:52981041|52981074:52981153:+	0.4	0.19	0.65	0.55	0.34	0.77	-0.15	0.6	(0,0):52,(0,1):5,(1,0):5,(1,1):26	0:11,1:25	(0,0):162,(0,1):6,(1,0):13,(1,1):59	0:53,1:25	chr17	ENST00000575882.1	TOM1L1	A3SS	CDS	NA	no_diff
chr10:127483449:127483796:-@chr10:127477932|127478097:127477852:-	0.56	0.41	0.71	0.67	0.46	0.9	-0.11	0.45	(0,0):274,(0,1):10,(1,0):38,(1,1):77	0:79,1:46	(0,0):254,(0,1):2,(1,0):24,(1,1):62	0:65,1:23	chr10	ENST00000368797.4	UROS	A3SS	CDS	NA	no_diff
chr16:2510086:2510171:+@chr16:2510284|2510624:2510694:+	0.39	0.23	0.58	0.49	0.27	0.71	-0.1	0.53	(0,0):102,(0,1):7,(1,0):23	0:23,1:7	(0,0):117,(0,1):5,(1,0):24	0:24,1:5	chr16	ENST00000361837.4	C16orf59	A3SS	CDS	NA	no_diff
chr16:720456:720557:+@chr16:720774|720892:721203:+	0.47	0.23	0.83	0.31	0.2	0.43	0.16	0.59	(0,0):225,(0,1):1,(1,0):11,(1,1):73	0:48,1:37	(0,0):580,(0,1):8,(1,0):27,(1,1):216	0:91,1:160	chr16	ENST00000445361.2	MSLN	A3SS	CDS	NA	no_diff
chr5:167891716:167891967:+@chr5:167894845|167894848:167894969:+	0.6	0.43	0.76	0.49	0.37	0.6	0.11	0.46	(0,0):52,(0,1):12,(1,0):20,(1,1):93	0:92,1:33	(0,0):97,(0,1):34,(1,0):33,(1,1):125	0:83,1:109	chr5	ENST00000265293.4	WWC1	A3SS	CDS	NA	no_diff
chr5:175812222:175812328:-@chr5:175811284|175811287:175810949:-	0.24	0.14	0.36	0.39	0.23	0.57	-0.15	0.63	(0,0):638,(0,1):34,(1,0):11,(1,1):444	0:155,1:334	(0,0):470,(0,1):14,(1,0):10,(1,1):289	0:84,1:229	chr5	ENST00000510123.1	NOP16	A3SS	CDS	NA	no_diff
chr5:157159876:157160052:+@chr5:157161588|157161679:157161753:+	0.77	0.56	0.94	0.66	0.47	0.84	0.11	0.55	(0,0):64,(0,1):1,(1,0):20,(1,1):31	0:39,1:13	(0,0):141,(0,1):3,(1,0):30,(1,1):62	0:75,1:20	chr5	ENST00000231198.7	THG1L	A3SS	CDS	NA	no_diff
chr3:78688894:78689048:-@chr3:78685093|78685258:78684923:-	0.71	0.45	0.95	0.58	0.48	0.69	0.13	0.62	(0,0):26,(0,1):1,(1,0):18,(1,1):28	0:32,1:15	(0,0):175,(0,1):13,(1,0):101,(1,1):187	0:217,1:84	chr3	ENST00000495273.1	ROBO1	A3SS	CDS	NA	no_diff
chr3:184032977:184033644:+@chr3:184033860|184033920:184034006:+	0.29	0.12	0.52	0.19	0.12	0.27	0.1	0.36	(0,0):103,(0,1):7,(1,0):3,(1,1):27	0:14,1:23	(0,0):735,(0,1):68,(1,0):18,(1,1):94	0:45,1:135	chr3	ENST00000444495.1	EIF2B5	A3SS	CDS	NA	no_diff
chr3:48719781:48719985:-@chr3:48719568|48719589:48719478:-	0.4	0.17	0.63	0.53	0.37	0.7	-0.13	0.55	(0,0):37,(0,1):9,(1,0):8,(1,1):33	0:19,1:31	(0,0):82,(0,1):11,(1,0):17,(1,1):72	0:47,1:53	chr3	ENST00000416649.2	NCKIPSD	A3SS	CDS	NA	no_diff
chr3:48732523:48733020:-@chr3:48732240|48732257:48732127:-	0.94	0.82	1	0.71	0.37	0.96	0.23	0.63	(0,0):157,(1,0):27,(1,1):267	0:291,1:3	(0,0):169,(1,0):9,(1,1):315	0:279,1:45	chr3	ENST00000433104.2	IP6K2	A3SS	CDS	NA	no_diff
chr14:104181761:104181839:-@chr14:104177904|104177998:104177803:-	0.32	0.2	0.49	0.48	0.3	0.69	-0.16	0.59	(0,0):322,(0,1):12,(1,0):15,(1,1):20	0:19,1:28	(0,0):643,(0,1):6,(1,0):19,(1,1):23	0:27,1:21	chr14	ENST00000554913.1	XRCC3	A3SS	UTR5	NA	no_diff
chr14:76249490:76249873:+@chr14:76259256|76259259:76259443:+	0.46	0.17	0.78	0.3	0.15	0.5	0.16	0.7	(0,0):23,(0,1):4,(1,0):3,(1,1):46	0:34,1:19	(0,0):47,(0,1):15,(1,0):6,(1,1):125	0:50,1:96	chr14	ENST00000557636.1	TTLL5	A3SS	CDS	NA	no_diff
chr14:23237167:23237380:+@chr14:23238986|23239006:23239143:+	0.62	0.29	0.89	0.74	0.45	0.96	-0.12	0.82	(0,0):189,(1,0):8,(1,1):195	0:109,1:94	(0,0):405,(1,0):18,(1,1):325	0:328,1:15	chr14	ENST00000285848.5	OXA1L	A3SS	CDS	NA	no_diff
chr14:20923290:20923553:+@chr14:20923737|20924073:20924260:+	0.65	0.57	0.73	0.75	0.66	0.84	-0.1	0.57	(0,0):576,(0,1):2,(1,0):372,(1,1):638	0:760,1:252	(0,0):544,(0,1):1,(1,0):407,(1,1):605	0:830,1:183	chr14	ENST00000555414.1	APEX1	A3SS	UTR5	NA	no_diff
chr14:64009497:64010122:-@chr14:64006407|64006410:64006247:-	0.78	0.52	0.96	0.66	0.5	0.8	0.12	0.58	(0,0):18,(0,1):2,(1,0):9,(1,1):45	0:42,1:14	(0,0):54,(0,1):9,(1,0):20,(1,1):144	0:120,1:53	chr14	ENST00000337537.3	PPP2R5E	A3SS	UTR5	NA	no_diff
chr2:3605976:3606588:+@chr2:3606994|3607038:3607319:+	0.47	0.28	0.68	0.3	0.16	0.46	0.17	0.73	(0,0):28,(0,1):10,(1,0):13,(1,1):119	0:70,1:72	(0,0):34,(0,1):14,(1,0):8,(1,1):154	0:50,1:126	chr2	ENST00000438436.1	AC108488.3	A3SS	UTR5	NA	no_diff
chr2:46819614:46819722:-@chr2:46815265|46815318:46815214:-	0.79	0.49	0.97	0.68	0.41	0.96	0.11	0.58	(0,0):122,(1,0):13,(1,1):19	0:26,1:6	(0,0):200,(0,1):1,(1,0):17,(1,1):27	0:36,1:9	chr2	ENST00000281382.6	PIGF	A3SS	CDS	NA	no_diff
chr2:74710449:74710537:+@chr2:74717152|74717371:74717600:+	0.57	0.27	0.91	0.36	0.2	0.62	0.21	0.85	(0,0):23,(0,1):1,(1,0):8,(1,1):15	0:19,1:5	(0,0):56,(1,0):14,(1,1):49	0:29,1:34	chr2	ENST00000424122.1	TTC31	A3SS	CDS	NA	no_diff
chr2:27579606:27579899:-@chr2:27573256|27573499:27573181:-	0.53	0.29	0.81	0.66	0.47	0.87	-0.13	0.73	(0,0):59,(0,1):1,(1,0):10,(1,1):21	0:20,1:12	(0,0):104,(0,1):3,(1,0):47,(1,1):71	0:83,1:38	chr2	ENST00000359541.2	GTF3C2	A3SS	UTR5	NA	no_diff
chr2:220110610:220110807:+@chr2:220111244|220111440:220111598:+	0.6	0.47	0.73	0.72	0.55	0.91	-0.12	0.52	(0,0):266,(0,1):1,(1,0):90,(1,1):214	0:209,1:96	(0,0):222,(0,1):1,(1,0):91,(1,1):181	0:208,1:65	chr2	ENST00000409638.3	STK16	A3SS	CDS	NA	no_diff
chr2:27579606:27579899:-@chr2:27573266|27573499:27573181:-	0.59	0.3	0.91	0.82	0.61	0.97	-0.23	0.83	(0,0):60,(1,0):10,(1,1):21	0:21,1:10	(0,0):107,(1,0):47,(1,1):71	0:112,1:6	chr2	ENST00000359541.2	GTF3C2	A3SS	UTR5	NA	no_diff
chr2:74173846:74174033:+@chr2:74177728|74177754:74177859:+	0.57	0.4	0.76	0.67	0.42	0.94	-0.1	0.56	(0,0):761,(1,0):34,(1,1):510	0:323,1:221	(0,0):523,(1,0):20,(1,1):272	0:245,1:47	chr2	ENST00000264093.4	DGUOK	A3SS	CDS	NA	no_diff
chr6:10723148:10723474:+@chr6:10724789|10724809:10724866:+	0.75	0.43	0.96	0.88	0.62	0.99	-0.13	0.4	(0,0):721,(0,1):1,(1,0):8,(1,1):60	0:38,1:31	(0,0):591,(1,0):11,(1,1):69	0:77,1:3	chr6	ENST00000229563.5	TMEM14C	A3SS	UTR5	NA	no_diff
chr6:33048457:33048553:-@chr6:33041370|33041549:33041248:-	0.21	0.09	0.41	0.39	0.21	0.6	-0.18	0.83	(0,0):220,(1,0):8,(1,1):38	0:15,1:31	(0,0):175,(1,0):17,(1,1):41	0:30,1:28	chr6	ENST00000419277	ENSG00000231389	A3SS	UTR5	NA	no_diff
chr6:13328528:13328806:-@chr6:13327138|13327195:13327019:-	0.51	0.3	0.74	0.66	0.39	0.86	-0.15	0.65	(0,0):125,(0,1):7,(1,0):12,(1,1):34	0:23,1:30	(0,0):74,(0,1):4,(1,0):10,(1,1):25	0:34,1:5	chr6	ENST00000356436.4	TBC1D7	A3SS	UTR5	NA	no_diff
chr22:50301369:50301592:-@chr22:50298032|50298154:50297985:-	0.77	0.66	0.87	0.88	0.76	0.96	-0.11	0.54	(0,0):228,(0,1):9,(1,0):131,(1,1):176	0:268,1:48	(0,0):194,(0,1):2,(1,0):134,(1,1):182	0:295,1:23	chr22	ENST00000330817.5	ALG12	A3SS	CDS	NA	no_diff
chr22:39916183:39916756:+@chr22:39917377|39917380:39917676:+	0.85	0.62	0.98	0.68	0.48	0.88	0.17	0.81	(0,0):2126,(0,1):1,(1,0):19,(1,1):2295	0:2265,1:50	(0,0):1943,(0,1):4,(1,0):14,(1,1):2238	0:1546,1:710	chr22	ENST00000337304.2	ATF4	A3SS	UTR3	NA	no_diff
chr15:42120283:42120386:+@chr15:42126938|42127092:42127421:+	0.84	0.53	0.99	0.7	0.41	0.96	0.14	0.59	(0,0):18,(1,0):15,(1,1):28	0:39,1:4	(0,0):37,(1,0):14,(1,1):43	0:56,1:1	chr15	ENST00000397299.4	JMJD7	A3SS	CDS	NA	no_diff
chr15:74277659:74281598:-@chr15:74277209|74277212:74277000:-	0.54	0.29	0.78	0.67	0.44	0.87	-0.13	0.61	(0,0):42,(0,1):5,(1,0):6,(1,1):83	0:42,1:52	(0,0):62,(0,1):5,(1,0):12,(1,1):122	0:75,1:64	chr15	ENST00000564777.1	STOML1	A3SS	CDS	NA	no_diff
chr15:75182348:75182430:+@chr15:75182779|75182894:75182995:+	0.8	0.6	0.94	0.62	0.43	0.83	0.18	0.77	(0,0):208,(1,0):42,(1,1):45	0:78,1:9	(0,0):283,(1,0):42,(1,1):68	0:88,1:22	chr15	ENST00000352410.4	MPI	A3SS	CDS	NA	no_diff
chr15:75182348:75182430:+@chr15:75182779|75182897:75182995:+	0.77	0.57	0.97	0.59	0.41	0.8	0.18	0.69	(0,0):208,(1,0):43,(1,1):44	0:78,1:9	(0,0):282,(0,1):1,(1,0):44,(1,1):66	0:72,1:39	chr15	ENST00000352410.4	MPI	A3SS	CDS	NA	no_diff
chr13:111536140:111536077|111535900:-@chr13:111530885:111532459:-	0.36	0.15	0.65	0.34	0.2	0.5	0.02	0.37	(0,0):53,(1,0):7,(1,1):205	0:70,1:142	(0,0):174,(1,0):16,(1,1):466	0:182,1:300	chr13	ENST00000267339.2	ANKRD10	A5SS	CDS	ConservedRegion	no_diff
chr13:45912911:45912797|45912791:-@chr13:45910734:45911523:-	0.8	0.54	0.99	0.82	0.61	0.97	-0.02	0.4	(0,0):1960,(1,0):16,(1,1):2391	0:2174,1:233	(0,0):2670,(1,0):23,(1,1):3410	0:2918,1:515	chr13	ENST00000379056.1	TPT1	A5SS	CDS	NA	no_diff
chr20:32247538:32247459|32247303:-@chr20:32246528:32246640:-	0.71	0.47	0.94	0.77	0.55	0.94	-0.06	0.58	(0,0):60,(1,0):24,(1,1):25	0:41,1:8	(0,0):107,(0,1):1,(1,0):31,(1,1):18	0:46,1:4	chr20	ENST00000375238.4	NECAB3	A5SS	CDS	ConservedRegion	no_diff
chr9:131223221:131223346|131223289:+@chr9:131233587:131233752:+	0.85	0.61	1	0.84	0.62	0.96	0.01	0.37	(0,0):128,(1,0):18,(1,1):42	0:59,1:1	(0,0):484,(1,0):45,(1,1):129	0:166,1:8	chr9	ENST00000393533.2	ODF2	A5SS	CDS	NA	no_diff
chr8:41907225:41907138|41907094:-@chr8:41905896:41906820:-	0.54	0.21	0.91	0.61	0.39	0.81	-0.07	0.61	(0,0):14,(0,1):1,(1,0):3,(1,1):43	0:34,1:13	(0,0):67,(0,1):4,(1,0):18,(1,1):418	0:216,1:224	chr8	ENST00000265713.2	KAT6A	A5SS	UTR5	NA	no_diff
chr8:48641495:48641664|48641609:+@chr8:48641974:48642168:+	0.33	0.17	0.53	0.27	0.17	0.41	0.06	0.32	(0,0):36,(0,1):11,(1,0):7,(1,1):16	0:9,1:25	(0,0):94,(0,1):25,(1,0):12,(1,1):21	0:18,1:40	chr8	ENST00000297423.4	KIAA0146	A5SS	CDS	NA	no_diff
chr8:56854414:56854550|56854487:+@chr8:56859007:56859052:+	0.82	0.61	0.99	0.86	0.7	0.95	-0.04	0.3	(0,0):42,(0,1):2,(1,0):29	0:29,1:2	(0,0):77,(0,1):2,(1,0):39	0:39,1:2	chr8	ENST00000519728.1	LYN	A5SS	CDS	NA	no_diff
chr8:145138292:145138419|145138327:+@chr8:145138617:145138764:+	0.6	0.41	0.86	0.59	0.41	0.78	0.01	0.39	(0,0):197,(1,0):40,(1,1):81	0:91,1:30	(0,0):347,(1,0):47,(1,1):101	0:123,1:25	chr8	ENST00000355091.4	GPAA1	A5SS	CDS	NA	no_diff
chr8:57125321:57125454|57125448:+@chr8:57127157:57128137:+	0.29	0.09	0.56	0.34	0.13	0.58	-0.05	0.42	(0,0):205,(0,1):7,(1,0):2,(1,1):23	0:11,1:21	(0,0):164,(0,1):10,(1,0):4,(1,1):34	0:10,1:38	chr8	ENST00000355315.3	CHCHD7	A5SS	CDS	IRES	no_diff
chr16:28847254:28847497|28847443:+@chr16:28848072:28848558:+	0.35	0.17	0.56	0.35	0.23	0.49	0	0.3	(0,0):230,(0,1):4,(1,0):9,(1,1):226	0:100,1:139	(0,0):678,(0,1):10,(1,0):24,(1,1):587	0:229,1:392	chr16	ENST00000340394.8	ATXN2L	A5SS	CDS	SF2	no_diff
chr16:88737685:88738101|88737873:+@chr16:88738221:88738587:+	0.26	0.13	0.44	0.29	0.14	0.53	-0.03	0.37	(0,0):10,(0,1):7,(1,0):6,(1,1):31	0:11,1:33	(0,0):14,(0,1):6,(1,0):6,(1,1):28	0:8,1:32	chr16	ENST00000563261.1	RP5-1142A6.3	A5SS	UTR5	Charlie1a	no_diff
chr16:31484762:31485055|31484877:+@chr16:31485156:31485421:+	0.88	0.66	0.99	0.85	0.59	0.96	0.03	0.3	(0,0):30,(1,0):23,(1,1):33	00:56:00	(0,0):81,(1,0):19,(1,1):30	0:47,1:2	chr16	ENST00000394863.3	TGFB1I1	A5SS	CDS	NA	no_diff
chr16:84216934:84216850|84216682:-@chr16:84215352:84216046:-	0.86	0.6	0.99	0.79	0.57	0.94	0.07	0.56	(0,0):48,(1,0):13,(1,1):35	0:42,1:6	(0,0):165,(0,1):1,(1,0):27,(1,1):100	0:105,1:23	chr16	ENST00000341690.6	TAF1C	A5SS	CDS	ConservedRegion	no_diff
chr16:4564665:4564632|4564576:-@chr16:4563697:4563852:-	0.82	0.58	0.97	0.73	0.42	0.95	0.09	0.55	(0,0):158,(1,0):18,(1,1):27	0:43,1:2	(0,0):123,(1,0):10,(1,1):24	0:27,1:7	chr16	ENST00000563332.1	C16orf5	A5SS	UTR3	NA	no_diff
chr19:11306496:11306298|11306232:-@chr19:11305151:11305266:-	0.67	0.47	0.85	0.65	0.54	0.75	0.02	0.29	(0,0):17,(0,1):4,(1,0):16,(1,1):24	0:24,1:20	(0,0):74,(0,1):23,(1,0):70,(1,1):82	0:124,1:51	chr19	ENST00000586659.1	KANK2	A5SS	UTR5	NA	no_diff
chr19:50315993:50315895|50315872:-@chr19:50314888:50314956:-	0.68	0.51	0.82	0.7	0.55	0.82	-0.02	0.29	(0,0):486,(0,1):10,(1,0):31,(1,1):36	0:58,1:19	(0,0):365,(0,1):10,(1,0):34,(1,1):22	0:48,1:18	chr19	ENST00000525130.1	FUZ	A5SS	CDS	ConservedRegion	no_diff
chr19:40331427:40331335|40331296:-@chr19:40331054:40331155:-	0.23	0.13	0.35	0.28	0.17	0.42	-0.05	0.27	(0,0):1452,(1,0):15,(1,1):217	0:55,1:177	(0,0):1314,(1,0):17,(1,1):212	0:75,1:154	chr19	ENST00000221801.2	FBL	A5SS	CDS	GA-rich	no_diff
chr19:40331427:40331368|40331290:-@chr19:40331054:40331155:-	0.19	0.13	0.27	0.27	0.19	0.36	-0.08	0.39	(0,0):1451,(1,0):32,(1,1):201	0:62,1:171	(0,0):1312,(1,0):44,(1,1):187	0:107,1:124	chr19	ENST00000221801.2	FBL	A5SS	CDS	GA-rich	no_diff
chr19:5901465:5901397|5901346:-@chr19:5896916:5897008:-	0.43	0.32	0.54	0.41	0.29	0.56	0.02	0.25	(0,0):2161,(0,1):1,(1,0):69,(1,1):281	0:176,1:175	(0,0):1317,(1,0):42,(1,1):181	0:102,1:121	chr19	ENST00000418389.2	NDUFA11	A5SS	CDS	NA	no_diff
chr19:11618863:11618806|11618517:-@chr19:11618272:11618377:-	0.91	0.82	0.97	0.89	0.75	0.97	0.02	0.17	(0,0):298,(0,1):2,(1,0):306,(1,1):57	0:354,1:11	(0,0):232,(0,1):1,(1,0):183,(1,1):40	0:223,1:1	chr19	ENST00000270517.6	ECSIT	A5SS	CDS	ConservedRegion	no_diff
chr19:49621112:49621344|49621275:+@chr19:49621609:49622236:+	0.27	0.15	0.4	0.2	0.06	0.37	0.07	0.36	(0,0):84,(0,1):32,(1,0):16,(1,1):156	0:65,1:139	(0,0):54,(0,1):13,(1,0):5,(1,1):99	0:20,1:97	chr19	ENST00000221459.2	LIN7B	A5SS	CDS	ConservedRegion	no_diff
chr19:40331427:40331368|40331260:-@chr19:40331054:40331155:-	0.15	0.11	0.21	0.24	0.17	0.31	-0.09	0.59	(0,0):1447,(1,0):36,(1,1):201	0:76,1:161	(0,0):1304,(1,0):52,(1,1):187	0:84,1:155	chr19	ENST00000221801.2	FBL	A5SS	CDS	GA-rich	no_diff
chr19:40331427:40331335|40331257:-@chr19:40331054:40331155:-	0.28	0.19	0.39	0.34	0.25	0.46	-0.06	0.28	(0,0):1429,(1,0):38,(1,1):217	0:102,1:153	(0,0):1285,(1,0):46,(1,1):212	0:106,1:152	chr19	ENST00000221801.2	FBL	A5SS	CDS	GA-rich	no_diff
chr19:19104549:19104457|19104445:-@chr19:19101697:19101958:-	0.61	0.19	0.96	0.62	0.47	0.77	-0.01	0.79	(0,0):365,(0,1):1,(1,0):3,(1,1):38	0:18,1:24	(0,0):1785,(0,1):13,(1,0):27,(1,1):201	0:151,1:90	chr19	ENST00000337018.5	SUGP2	A5SS	UTR3	NA	no_diff
chr19:19104549:19104457|19104447:-@chr19:19101697:19101958:-	0.66	0.24	0.96	0.68	0.54	0.8	-0.02	0.55	(0,0):364,(0,1):1,(1,0):4,(1,1):38	0:31,1:12	(0,0):1777,(0,1):13,(1,0):35,(1,1):201	0:189,1:60	chr19	ENST00000337018.5	SUGP2	A5SS	UTR3	NA	no_diff
chr19:40331427:40331335|40331290:-@chr19:40331054:40331155:-	0.21	0.12	0.33	0.26	0.15	0.39	-0.05	0.23	(0,0):1451,(1,0):16,(1,1):217	0:39,1:194	(0,0):1312,(1,0):19,(1,1):212	0:80,1:151	chr19	ENST00000221801.2	FBL	A5SS	CDS	GA-rich	no_diff
chr19:40331427:40331335|40331260:-@chr19:40331054:40331155:-	0.16	0.09	0.23	0.21	0.14	0.3	-0.05	0.22	(0,0):1447,(1,0):20,(1,1):217	0:66,1:171	(0,0):1304,(1,0):27,(1,1):212	0:57,1:182	chr19	ENST00000221801.2	FBL	A5SS	CDS	GA-rich	no_diff
chr19:40331427:40331311|40331257:-@chr19:40331054:40331155:-	0.39	0.26	0.53	0.44	0.3	0.62	-0.05	0.31	(0,0):1429,(1,0):31,(1,1):224	0:116,1:139	(0,0):1285,(1,0):35,(1,1):223	0:123,1:135	chr19	ENST00000221801.2	FBL	A5SS	CDS	GA-rich	no_diff
chr19:40331427:40331368|40331296:-@chr19:40331054:40331155:-	0.2	0.13	0.29	0.28	0.2	0.38	-0.08	0.38	(0,0):1452,(1,0):31,(1,1):201	0:80,1:152	(0,0):1314,(1,0):42,(1,1):187	0:75,1:154	chr19	ENST00000221801.2	FBL	A5SS	CDS	GA-rich	no_diff
chr3:39142593:39142507|39142279:-@chr3:39141796:39141994:-	0.26	0.14	0.47	0.28	0.16	0.43	-0.02	0.27	(0,0):141,(1,0):12,(1,1):50	0:19,1:43	(0,0):151,(1,0):16,(1,1):58	0:28,1:46	chr3	ENST00000441302.2	GORASP1	A5SS	CDS	ConservedRegion	no_diff
chr3:47610717:47610642|47610561:-@chr3:47603725:47604251:-	0.25	0.1	0.42	0.18	0.08	0.31	0.07	0.36	(0,0):69,(0,1):14,(1,0):6,(1,1):34	0:12,1:42	(0,0):183,(0,1):20,(1,0):6,(1,1):71	0:30,1:67	chr3	ENST00000456150.1	CSPG5	A5SS	CDS	NA	no_diff
chr3:196294178:196294062|196293761:-@chr3:196287678:196288362:-	0.85	0.6	0.99	0.87	0.69	0.99	-0.02	0.42	(0,0):31,(1,0):32,(1,1):80	0:88,1:24	(0,0):82,(1,0):45,(1,1):110	0:117,1:38	chr3	ENST00000332629.5	WDR53	A5SS	UTR5	uORF,IRES	no_diff
chr3:183860840:183861353|183860930:+@chr3:183861887:183862012:+	0.62	0.37	0.92	0.57	0.42	0.8	0.05	0.41	(0,0):95,(1,0):43,(1,1):27	0:53,1:17	(0,0):206,(1,0):99,(1,1):60	0:138,1:21	chr3	ENST00000444495.1	EIF2B5	A5SS	CDS	ConservedRegion,uORF	no_diff
chr4:104007697:104007637|104006506:-@chr4:104004028:104004086:-	0.44	0.2	0.77	0.38	0.16	0.74	0.06	0.58	(0,0):110,(0,1):3,(1,0):42	0:42,1:3	(0,0):134,(0,1):3,(1,0):35	0:35,1:3	chr4	ENST00000296424.4	BDH2	A5SS	CDS	ConservedRegion	no_diff
chr4:108779628:108779740|108779709:+@chr4:108816466:108817164:+	0.2	0.07	0.48	0.25	0.13	0.41	-0.05	0.36	(0,0):12,(0,1):9,(1,0):2,(1,1):50	0:17,1:44	(0,0):42,(0,1):18,(1,0):8,(1,1):198	0:45,1:179	chr4	ENST00000394684.4	SGMS2	A5SS	UTR5	NA	no_diff
chr4:42122311:42122142|42122071:-@chr4:42112870:42119752:-	0.43	0.22	0.74	0.48	0.33	0.63	-0.05	0.39	(0,0):104,(0,1):4,(1,0):5,(1,1):456	0:203,1:262	(0,0):234,(0,1):13,(1,0):20,(1,1):1323	0:699,1:657	chr4	ENST00000502486.1	BEND4	A5SS	CDS	NA	no_diff
chr2:74686565:74686689|74686679:+@chr2:74686770:74686872:+	0.72	0.33	0.95	0.81	0.57	0.96	-0.09	0.53	(0,0):406,(1,0):6,(1,1):83	0:74,1:15	(0,0):408,(0,1):2,(1,0):15,(1,1):74	0:64,1:27	chr2	ENST00000233615.2	WBP1	A5SS	CDS	NA	no_diff
chr5:1633021:1632960|1632759:-@chr5:1601943:1602850:-	0.3	0.17	0.46	0.23	0.12	0.37	0.07	0.32	(0,0):341,(0,1):18,(1,0):9,(1,1):10	0:11,1:26	(0,0):570,(0,1):28,(1,0):10,(1,1):16	0:13,1:41	chr5	ENST00000507290.1	RP11-43F13.1	A5SS	UTR5	NA	no_diff
chr5:154173360:154173560|154173482:+@chr5:154173660:154173822:+	0.68	0.51	0.84	0.69	0.58	0.79	-0.01	0.25	(0,0):148,(0,1):5,(1,0):42,(1,1):108	0:131,1:24	(0,0):525,(0,1):12,(1,0):140,(1,1):412	0:429,1:135	chr5	ENST00000336314.4	LARP1	A5SS	CDS	NA	no_diff
chr7:73098097:73098330|73098180:+@chr7:73100966:73101061:+	0.36	0.26	0.5	0.36	0.25	0.5	0	0.22	(0,0):995,(0,1):4,(1,0):51,(1,1):93	0:85,1:63	(0,0):837,(1,0):47,(1,1):96	0:72,1:71	chr7	ENST00000265758.2	WBSCR22	A5SS	CDS	NA	no_diff
chr7:99810756:99810670|99810576:-@chr7:99806561:99809617:-	0.9	0.69	0.99	0.85	0.67	0.98	0.05	0.36	(0,0):123,(1,0):13,(1,1):104	0:104,1:13	(0,0):131,(0,1):1,(1,0):17,(1,1):211	0:206,1:23	chr7	ENST00000426455.1	STAG3	A5SS	CDS	MLT1A0,MSTC	no_diff
chr7:73098097:73098253|73098180:+@chr7:73100966:73101061:+	0.51	0.36	0.71	0.42	0.28	0.6	0.09	0.45	(0,0):1007,(0,1):4,(1,0):39,(1,1):93	0:87,1:49	(0,0):857,(1,0):27,(1,1):96	0:71,1:52	chr7	ENST00000265758.2	WBSCR22	A5SS	CDS	NA	no_diff
chr17:70944014:70943891|70943870:-@chr17:70845733:70845943:-	0.28	0.15	0.43	0.22	0.11	0.38	0.06	0.28	(0,0):45,(0,1):20,(1,0):9,(1,1):64	0:24,1:69	(0,0):63,(0,1):21,(1,0):7,(1,1):65	0:24,1:69	chr17	ENST00000255559.3	SLC39A11	A5SS	CDS	NA	no_diff
chr17:65989351:65989160|65989017:-@chr17:65987215:65988219:-	0.24	0.16	0.34	0.2	0.13	0.29	0.04	0.18	(0,0):71,(0,1):25,(1,0):24,(1,1):521	0:120,1:450	(0,0):78,(0,1):27,(1,0):23,(1,1):621	0:129,1:542	chr17	ENST00000449250.2	C17orf58	A5SS	CDS	NA	no_diff
chr17:58162564:58162474|58162464:-@chr17:58160927:58161127:-	0.69	0.41	0.9	0.76	0.53	0.93	-0.07	0.5	(0,0):16,(0,1):2,(1,0):7,(1,1):16	0:22,1:3	(0,0):11,(0,1):2,(1,0):9,(1,1):11	0:20,1:2	chr17	ENST00000566140.1	CTD-2319I12.1	A5SS	UTR3	NA	no_diff
chr17:74723052:74723295|74723260:+@chr17:74725772:74725876:+	0.25	0.13	0.42	0.32	0.16	0.53	-0.07	0.35	(0,0):188,(0,1):22,(1,0):8,(1,1):24	0:16,1:38	(0,0):193,(0,1):10,(1,0):6,(1,1):32	0:12,1:36	chr17	ENST00000590964.1	METTL23	A5SS	UTR5	ConservedRegion,IRES	no_diff
chr17:61781942:61781792|61781701:-@chr17:61780238:61781407:-	0.7	0.46	0.9	0.74	0.61	0.88	-0.04	0.41	(0,0):183,(0,1):1,(1,0):32,(1,1):555	0:426,1:162	(0,0):162,(0,1):4,(1,0):47,(1,1):630	0:559,1:122	chr17	ENST00000245865.5	STRADA	A5SS	CDS	ConservedRegion	no_diff
chr14:24683805:24683752|24683698:-@chr14:24682615:24683357:-	0.74	0.57	0.87	0.66	0.48	0.83	0.08	0.39	(0,0):212,(0,1):6,(1,0):25,(1,1):83	0:81,1:33	(0,0):163,(0,1):8,(1,0):19,(1,1):56	0:55,1:28	chr14	ENST00000565988.1	AL136419.6	A5SS	CDS	NA	no_diff
chr11:124972705:124972630|124972533:-@chr11:124972028:124972213:-	0.67	0.49	0.85	0.75	0.58	0.88	-0.08	0.39	(0,0):69,(0,1):7,(1,0):29,(1,1):19	0:38,1:17	(0,0):65,(0,1):5,(1,0):32,(1,1):22	0:48,1:11	chr11	ENST00000531909.1	TMEM218	A5SS	UTR5	IRES,uORF	no_diff
chr11:125831893:125831619|125831550:-@chr11:125826695:125831000:-	0.14	0	0.44	0.16	0.05	0.34	-0.02	0.35	(0,0):14,(0,1):3,(1,1):212	0:60,1:155	(0,0):37,(0,1):14,(1,0):3,(1,1):508	0:56,1:469	chr11	ENST00000392693.3	CDON	A5SS	CDS	NA	no_diff
chr11:67163582:67163646|67163642:+@chr11:67163734:67163871:+	0.86	0.63	0.98	0.86	0.67	0.98	0	0.33	(0,0):34,(0,1):1,(1,0):10,(1,1):11	0:19,1:3	(0,0):33,(0,1):1,(1,0):14,(1,1):22	0:26,1:11	chr11	ENST00000307980.2	RAD9A	A5SS	CDS	ConservedRegion	no_diff
chr11:47317047:47317130|47317118:+@chr11:47317448:47317606:+	0.72	0.46	0.89	0.79	0.67	0.89	-0.07	0.35	(0,0):32,(0,1):3,(1,0):11,(1,1):17	0:24,1:7	(0,0):116,(0,1):8,(1,0):38,(1,1):49	0:74,1:21	chr11	ENST00000342922.4	MADD	A5SS	CDS	NA	no_diff
chr11:124747415:124748027|124747554:+@chr11:124748480:124749237:+	0.68	0.42	0.91	0.76	0.47	0.96	-0.08	0.66	(0,0):42,(0,1):1,(1,0):13,(1,1):21	0:28,1:7	(0,0):39,(1,0):16,(1,1):27	0:39,1:4	chr11	ENST00000397801.1	ROBO3	A5SS	CDS	ConservedRegion,uORF	no_diff
chr11:123611244:123611101|123610825:-@chr11:123601195:123601693:-	0.48	0.2	0.78	0.52	0.31	0.74	-0.04	0.52	(0,0):50,(1,0):11,(1,1):57	0:50,1:18	(0,0):110,(1,0):23,(1,1):100	0:85,1:38	chr11	ENST00000336139.4	ZNF202	A5SS	UTR5	ConservedRegion,uORF	no_diff
chr11:123611244:123611125|123610825:-@chr11:123601195:123601693:-	0.39	0.19	0.66	0.44	0.26	0.69	-0.05	0.47	(0,0):50,(1,0):11,(1,1):57	0:27,1:41	(0,0):109,(0,1):1,(1,0):24,(1,1):99	0:73,1:51	chr11	ENST00000336139.4	ZNF202	A5SS	UTR5	ConservedRegion,uORF	no_diff
chr11:3845500:3845685|3845594:+@chr11:3846250:3846358:+	0.23	0.09	0.39	0.24	0.13	0.37	-0.01	0.26	(0,0):157,(0,1):9,(1,0):10,(1,1):36	0:21,1:34	(0,0):145,(0,1):14,(1,0):12,(1,1):37	0:23,1:40	chr11	ENST00000528216.1	PGAP2	A5SS	CDS	ConservedRegion	no_diff
chr11:31823324:31823310|31822778:-@chr11:31822239:31822404:-	0.42	0.24	0.7	0.48	0.27	0.75	-0.06	0.45	(0,0):50,(1,0):40,(1,1):22	0:57,1:5	(0,0):87,(1,0):45,(1,1):21	0:48,1:18	chr11	ENST00000419022.1	PAX6	A5SS	CDS	ConservedRegion	no_diff
chr1:1203372:1203242|1203113:-@chr1:1201478:1201670:-	0.29	0.19	0.42	0.24	0.14	0.35	0.05	0.26	(0,0):247,(0,1):9,(1,0):26,(1,1):144	0:78,1:101	(0,0):216,(0,1):9,(1,0):19,(1,1):128	0:52,1:104	chr1	ENST00000349431.6	UBE2J2	A5SS	CDS	IRES	no_diff
chr1:155716587:155716726|155716662:+@chr1:155716920:155717687:+	0.37	0.23	0.52	0.34	0.19	0.48	0.03	0.29	(0,0):131,(0,1):19,(1,0):13,(1,1):87	0:36,1:83	(0,0):206,(0,1):21,(1,0):14,(1,1):125	0:50,1:110	chr1	ENST00000452804.2	MSTO1	A5SS	UTR3	NA	no_diff
chr1:46655239:46655156|46655126:-@chr1:46654353:46655029:-	0.82	0.62	0.97	0.8	0.55	0.96	0.02	0.38	(0,0):180,(1,0):28,(1,1):640	0:542,1:126	(0,0):164,(1,0):21,(1,1):535	0:465,1:91	chr1	ENST00000371984.3	POMGNT1	A5SS	CDS	NA	no_diff
chr15:60688626:60688479|60688215:-@chr15:60686773:60686894:-	0.68	0.38	0.99	0.76	0.43	0.96	-0.08	0.63	(0,0):261,(1,0):21,(1,1):21	0:34,1:8	(0,0):276,(1,0):23,(1,1):24	0:41,1:6	chr15	ENST00000396024.3	ANXA2	A5SS	CDS	NA	no_diff
chr15:41145909:41146127|41146079:+@chr15:41146258:41146284:+	0.58	0.36	0.82	0.53	0.39	0.67	0.05	0.35	(0,0):60,(0,1):5,(1,0):18,(1,1):41	0:43,1:21	(0,0):146,(0,1):13,(1,0):43,(1,1):111	0:109,1:58	chr15	ENST00000562057.1	SPINT1	A5SS	CDS	NA	no_diff
chr10:103868934:103868792|103868786:-@chr10:103867091:103868080:-	0.66	0.54	0.77	0.66	0.55	0.76	0	0.21	(0,0):350,(0,1):20,(1,0):42,(1,1):1048	0:803,1:307	(0,0):497,(0,1):27,(1,0):56,(1,1):1152	0:856,1:379	chr10	ENST00000361198.5	LDB1	A5SS	CDS	NA	no_diff
chr10:49687807:49687679|49687631:-@chr10:49667727:49667934:-	0.72	0.5	0.91	0.72	0.42	0.93	0	0.54	(0,0):28,(0,1):2,(1,0):12,(1,1):19	0:28,1:5	(0,0):87,(0,1):2,(1,0):11,(1,1):27	0:28,1:12	chr10	ENST00000249601.4	ARHGAP22	A5SS	CDS	ConservedRegion	no_diff
chr10:135116484:135116333|135116263:-@chr10:135113489:135113617:-	0.84	0.6	0.99	0.88	0.71	0.99	-0.04	0.37	(0,0):235,(1,0):38,(1,1):124	0:161,1:1	(0,0):358,(1,0):75,(1,1):238	0:271,1:42	chr10	ENST00000417178.2	TUBGCP2	A5SS	CDS	ConservedRegion	no_diff
chr10:70098260:70098426|70098399:+@chr10:70098897:70100010:+	0.45	0.37	0.54	0.54	0.48	0.6	-0.09	0.46	(0,0):869,(0,1):70,(1,0):64,(1,1):404	0:211,1:327	(0,0):1764,(0,1):110,(1,0):142,(1,1):819	0:581,1:490	chr10	ENST00000265866.7	HNRNPH3	A5SS	CDS	NA	no_diff
chr6:28239632:28240116|28240113:+@chr6:28240447:28240564:+	0.87	0.6	0.98	0.86	0.69	0.96	0.01	0.27	(0,0):31,(1,0):8,(1,1):35	0:37,1:6	(0,0):114,(0,1):2,(1,0):18,(1,1):127	0:132,1:15	chr6	ENST00000316606	ENSG00000197062	A5SS	UTR5	SF2	no_diff
chr6:28327302:28327765|28327678:+@chr6:28329101:28329248:+	0.65	0.37	0.91	0.6	0.36	0.81	0.05	0.65	(0,0):32,(0,1):2,(1,0):10,(1,1):37	0:32,1:17	(0,0):56,(0,1):3,(1,0):13,(1,1):67	0:43,1:40	chr6	ENST00000252211.2	ZKSCAN3	A5SS	CDS	SF2	no_diff
chr12:9809164:9809293|9809245:+@chr12:9809517:9811018:+	0.55	0.24	0.83	0.61	0.38	0.81	-0.06	0.49	(0,0):6,(0,1):3,(1,0):5,(1,1):39	0:27,1:20	(0,0):12,(0,1):4,(1,0):10,(1,1):69	0:37,1:46	chr12	ENST00000575094.1	RP11-705C15.2	A5SS	UTR5	NA	no_diff
chr12:120638634:120638529|120638522:-@chr12:120635739:120637288:-	0.48	0.34	0.74	0.45	0.26	0.76	0.03	0.35	(0,0):14435,(1,0):22,(1,1):10712	0:3712,1:7022	(0,0):12029,(1,0):18,(1,1):9109	0:3823,1:5304	chr12	ENST00000392514.4	RPLP0	A5SS	CDS	NA	no_diff
chr12:57883050:57883341|57883128:+@chr12:57883990:57884162:+	0.48	0.34	0.64	0.51	0.42	0.62	-0.03	0.26	(0,0):282,(1,0):55,(1,1):100	0:94,1:61	(0,0):984,(1,0):161,(1,1):266	0:288,1:139	chr12	ENST00000262027.5	MARS	A5SS	CDS	uORF	no_diff
chr12:102120072:102120275|102120182:+@chr12:102122679:102123154:+	0.23	0.17	0.3	0.29	0.21	0.36	-0.06	0.23	(0,0):113,(0,1):88,(1,0):36,(1,1):151	0:67,1:208	(0,0):174,(0,1):77,(1,0):43,(1,1):141	0:88,1:173	chr12	ENST00000229266.3	CHPT1	A5SS	CDS	NA	no_diff
chr20:62505021:62505173|62505158:+@chr20:62514072:62514262:+	0.75	0.46	0.93	0.89	0.62	1	-0.14	0.62	(0,0):705,(0,1):1,(1,0):13,(1,1):186	0:139,1:61	(0,0):847,(1,0):18,(1,1):195	0:182,1:31	chr20	ENST00000346249.4	TPD52L2	A5SS	CDS	NA	no_diff
chrX:148623564:148623630|148623611:+@chrX:148626914:148627046:+	0.31	0.2	0.44	0.42	0.29	0.57	-0.11	0.46	(0,0):163,(0,1):32,(1,0):19,(1,1):44	0:25,1:70	(0,0):144,(0,1):19,(1,0):20,(1,1):40	0:36,1:43	chrX	ENST00000441248.1	CXorf40A	A5SS	UTR5	NA	no_diff
chr9:136223790:136224110|136224058:+@chr9:136224587:136224946:+	0.43	0.28	0.61	0.58	0.4	0.75	-0.15	0.69	(0,0):462,(0,1):13,(1,0):18,(1,1):202	0:93,1:140	(0,0):364,(0,1):7,(1,0):18,(1,1):141	0:89,1:77	chr9	ENST00000371964.4	SURF2	A5SS	CDS	NA	no_diff
chr8:145651446:145651305|145651258:-@chr8:145648999:145651155:-	0.47	0.25	0.73	0.27	0.05	0.54	0.2	0.82	(0,0):1623,(0,1):4,(1,0):11,(1,1):849	0:248,1:616	(0,0):1185,(0,1):2,(1,0):3,(1,1):745	0:325,1:425	chr8	ENST00000526054.1	VPS28	A5SS	CDS	NA	no_diff
chr16:1717963:1718194|1718185:+@chr16:1719002:1719166:+	0.62	0.37	0.86	0.79	0.64	0.91	-0.17	0.7	(0,0):27,(0,1):4,(1,0):8,(1,1):35	0:25,1:22	(0,0):61,(0,1):6,(1,0):27,(1,1):84	0:92,1:25	chr16	ENST00000454337.1	LA16c-431H6.6	A5SS	CDS	NA	no_diff
chr16:31045547:31045857|31045646:+@chr16:31046291:31046361:+	0.82	0.58	0.98	0.71	0.53	0.89	0.11	0.53	(0,0):259,(1,0):67,(1,1):35	0:96,1:6	(0,0):199,(0,1):3,(1,0):60,(1,1):22	0:80,1:5	chr16	ENST00000394998.1	STX4	A5SS	CDS	NA	no_diff
chr16:4533638:4533755|4533739:+@chr16:4555485:4555611:+	0.83	0.63	1	0.72	0.44	0.91	0.11	0.49	(0,0):277,(1,0):17,(1,1):128	0:91,1:54	(0,0):234,(1,0):8,(1,1):80	0:66,1:22	chr16	ENST00000570646.1	HMOX2	A5SS	UTR5	NA	no_diff
chr16:30770568:30770499|30770333:-@chr16:30768743:30768975:-	0.25	0.13	0.41	0.43	0.21	0.74	-0.18	0.81	(0,0):48,(0,1):12,(1,0):11,(1,1):28	0:15,1:36	(0,0):52,(0,1):3,(1,0):10,(1,1):23	0:23,1:13	chr16	ENST00000563588.1	PHKG2	A5SS	CDS	NA	no_diff
chr19:42804244:42804194|42804161:-@chr19:42801184:42801517:-	0.67	0.54	0.8	0.55	0.35	0.78	0.12	0.55	(0,0):972,(0,1):5,(1,0):62,(1,1):752	0:574,1:245	(0,0):729,(1,0):29,(1,1):537	0:348,1:218	chr19	ENST00000262890.2	PAFAH1B3	A5SS	CDS	NA	no_diff
chr19:5931542:5931430|5931415:-@chr19:5927979:5928098:-	0.54	0.46	0.62	0.43	0.35	0.52	0.11	0.73	(0,0):292,(0,1):57,(1,0):79,(1,1):128	0:134,1:130	(0,0):332,(0,1):64,(1,0):58,(1,1):125	0:123,1:124	chr19	ENST00000439268.2	RANBP3	A5SS	CDS	NA	no_diff
chr19:19903293:19903220|19902371:-@chr19:19896650:19897663:-	0.61	0.37	0.88	0.78	0.51	0.99	-0.17	0.66	(0,0):26,(1,0):16,(1,1):31	0:34,1:13	(0,0):151,(1,0):29,(1,1):47	0:67,1:9	chr19	ENST00000443905.2	ZNF506	A5SS	UTR3	NA	no_diff
chr19:16758072:16757931|16757907:-@chr19:16741562:16742535:-	0.82	0.73	0.89	0.72	0.59	0.83	0.1	0.41	(0,0):1787,(0,1):13,(1,0):75,(1,1):601	0:587,1:102	(0,0):1614,(0,1):12,(1,0):38,(1,1):378	0:279,1:149	chr19	ENST00000487803.1	C19orf42	A5SS	UTR5	NA	no_diff
chr19:13227245:13227001|13226950:-@chr19:13226453:13226866:-	0.9	0.7	1	0.76	0.48	0.93	0.14	0.54	(0,0):247,(1,0):20,(1,1):141	0:157,1:4	(0,0):417,(0,1):1,(1,0):22,(1,1):255	0:245,1:33	chr19	ENST00000357720.4	TRMT1	A5SS	CDS	NA	no_diff
chr19:40331427:40331290|40331257:-@chr19:40331054:40331155:-	0.5	0.31	0.79	0.61	0.41	0.85	-0.11	0.59	(0,0):1429,(1,0):22,(1,1):233	0:136,1:119	(0,0):1285,(1,0):27,(1,1):231	0:169,1:89	chr19	ENST00000221801.2	FBL	A5SS	CDS	NA	no_diff
chr19:44936541:44936397|44935942:-@chr19:44930423:44934717:-	0.7	0.45	0.94	0.53	0.38	0.71	0.17	0.63	(0,0):11,(1,0):21,(1,1):259	0:179,1:101	(0,0):28,(1,0):39,(1,1):727	0:306,1:460	chr19	ENST00000291187.4	ZNF229	A5SS	CDS	NA	no_diff
chr19:18548798:18548670|18548409:-@chr19:18547140:18547915:-	0.45	0.28	0.7	0.55	0.44	0.67	-0.1	0.45	(0,0):138,(1,0):19,(1,1):147	0:89,1:77	(0,0):610,(1,0):107,(1,1):630	0:408,1:329	chr19	ENST00000545187.1	ISYNA1	A5SS	CDS	NA	no_diff
chr19:56886055:56886194|56886126:+@chr19:56888236:56891194:+	0.74	0.43	0.98	0.5	0.3	0.71	0.24	0.86	(0,0):37,(1,0):8,(1,1):444	0:368,1:84	(0,0):112,(0,1):3,(1,0):13,(1,1):915	0:443,1:488	chr19	ENST00000467807.1	ZNF542	A5SS	UTR3	NA	no_diff
chr3:51994336:51994205|51993911:-@chr3:51993593:51993667:-	0.62	0.42	0.83	0.8	0.6	0.97	-0.18	0.68	(0,0):96,(0,1):2,(1,0):44,(1,1):24	0:59,1:11	(0,0):61,(0,1):1,(1,0):47,(1,1):17	0:59,1:6	chr3	ENST00000355852.2	PCBP4	A5SS	CDS	NA	no_diff
chr2:85582678:85582839|85582721:+@chr2:85584090:85584865:+	0.62	0.42	0.82	0.72	0.56	0.87	-0.1	0.48	(0,0):95,(0,1):5,(1,0):16,(1,1):64	0:45,1:40	(0,0):127,(0,1):4,(1,0):22,(1,1):75	0:82,1:19	chr2	ENST00000409013.3	ELMOD3	A5SS	UTR5	NA	no_diff
chr2:111881310:111881716|111881446:+@chr2:111921710:111926024:+	0.62	0.46	0.86	0.73	0.61	0.85	-0.11	0.49	(0,0):220,(1,0):49,(1,1):1274	0:710,1:613	(0,0):614,(0,1):1,(1,0):101,(1,1):2210	0:1806,1:506	chr2	ENST00000308659.8	BCL2L11	A5SS	CDS	NA	no_diff
chr2:114353270:114353780|114353406:+@chr2:114353958:114354159:+	0.3	0.2	0.42	0.44	0.28	0.63	-0.14	0.61	(0,0):55,(1,0):35,(1,1):90	0:62,1:63	(0,0):68,(1,0):40,(1,1):67	0:67,1:40	chr2	ENST00000326632	ENSG00000146556	A5SS	UTR3	NA	no_diff
chr5:153832016:153832059|153832055:+@chr5:153832962:153833064:+	0.54	0.28	0.76	0.69	0.48	0.89	-0.15	0.63	(0,0):230,(0,1):6,(1,0):9,(1,1):28	0:22,1:21	(0,0):241,(0,1):4,(1,0):13,(1,1):41	0:41,1:17	chr5	ENST00000297109.5	SAP30L	A5SS	CDS	NA	no_diff
chr7:98984308:98984422|98984358:+@chr7:98985662:98985884:+	0.56	0.37	0.82	0.42	0.29	0.57	0.14	0.55	(0,0):302,(1,0):36,(1,1):213	0:146,1:103	(0,0):427,(1,0):38,(1,1):295	0:169,1:164	chr7	ENST00000252725.5	ARPC1B	A5SS	CDS	NA	no_diff
chr7:154735737:154736330|154736108:+@chr7:154738070:154739122:+	0.68	0.33	0.93	0.85	0.64	0.98	-0.17	0.59	(0,0):74,(1,0):4,(1,1):28	0:14,1:18	(0,0):230,(1,0):25,(1,1):147	0:154,1:18	chr7	ENST00000411526.1	AC093726.6	A5SS	CDS	NA	no_diff
chr7:98984308:98984416|98984358:+@chr7:98985662:98985884:+	0.59	0.42	0.77	0.46	0.32	0.63	0.13	0.55	(0,0):302,(1,0):36,(1,1):213	0:191,1:58	(0,0):427,(1,0):38,(1,1):295	0:211,1:122	chr7	ENST00000252725.5	ARPC1B	A5SS	CDS	NA	no_diff
chr17:37830307:37830246|37829767:-@chr17:37829304:37829508:-	0.74	0.45	0.99	0.54	0.33	0.76	0.2	0.77	(0,0):53,(1,0):25,(1,1):13	0:35,1:3	(0,0):91,(0,1):1,(1,0):49,(1,1):38	0:79,1:9	chr17	ENST00000579146.1	PGAP3	A5SS	CDS	NA	no_diff
chr17:8283254:8283119|8283108:-@chr17:8280834:8281010:-	0.76	0.66	0.87	0.62	0.53	0.71	0.14	0.94	(0,0):5711,(1,0):173,(1,1):4896	0:3871,1:1198	(0,0):5109,(1,0):124,(1,1):4315	0:2958,1:1481	chr17	ENST00000293842.5	RPL26	A5SS	CDS	NA	no_diff
chr17:73847757:73847675|73847537:-@chr17:73845685:73845820:-	0.67	0.53	0.82	0.78	0.64	0.92	-0.11	0.49	(0,0):628,(1,0):127,(1,1):206	0:255,1:78	(0,0):795,(1,0):182,(1,1):246	0:384,1:44	chr17	ENST00000254806.3	WBP2	A5SS	CDS	NA	no_diff
chr17:15903432:15903696|15903526:+@chr17:15905229:15905339:+	0.57	0.3	0.87	0.73	0.48	0.97	-0.16	0.67	(0,0):126,(1,0):20,(1,1):30	0:46,1:4	(0,0):200,(1,0):43,(1,1):45	0:82,1:6	chr17	ENST00000261647.4	TTC19	A5SS	CDS	NA	no_diff
chr17:8283254:8283119|8283110:-@chr17:8280834:8281010:-	0.88	0.79	0.97	0.76	0.64	0.89	0.12	0.53	(0,0):5711,(1,0):173,(1,1):4896	0:4093,1:976	(0,0):5109,(1,0):124,(1,1):4315	0:3957,1:482	chr17	ENST00000293842.5	RPL26	A5SS	CDS	NA	no_diff
chr14:20813091:20813285|20813246:+@chr14:20813553:20813623:+	0.73	0.59	0.84	0.85	0.77	0.91	-0.12	0.52	(0,0):57,(0,1):9,(1,0):39,(1,1):34	0:63,1:19	(0,0):128,(0,1):14,(1,0):126,(1,1):105	0:218,1:27	chr14	ENST00000429687.3	PARP2	A5SS	CDS	NA	no_diff
chr14:21731988:21731826|21731779:-@chr14:21731063:21731495:-	0.82	0.59	0.96	0.59	0.35	0.82	0.23	0.88	(0,0):1125,(0,1):1,(1,0):13,(1,1):54	0:63,1:5	(0,0):1166,(0,1):2,(1,0):10,(1,1):94	0:98,1:8	chr14	ENST00000336053.6	HNRNPC	A5SS	UTR5	NA	no_diff
chr11:66137003:66136840|66136531:-@chr11:66136008:66136142:-	0.54	0.3	0.8	0.43	0.27	0.62	0.11	0.5	(0,0):55,(0,1):1,(1,0):22,(1,1):30	0:35,1:18	(0,0):64,(0,1):4,(1,0):30,(1,1):40	0:41,1:33	chr11	ENST00000311161.7	SLC29A2	A5SS	CDS	NA	no_diff
chr15:63356263:63356389|63356341:+@chr15:63358095:63364111:+	0.19	0.05	0.38	0.36	0.18	0.62	-0.17	0.61	(0,0):321,(0,1):8,(1,0):2,(1,1):1414	0:280,1:1144	(0,0):417,(0,1):4,(1,0):7,(1,1):1731	0:505,1:1237	chr15	ENST00000288398.6	TPM1	A5SS	CDS	NA	no_diff
chr18:51888013:51888801|51888318:+@chr18:51889141:51889295:+	0.39	0.19	0.67	0.55	0.41	0.69	-0.16	0.78	(0,0):22,(0,1):2,(1,0):11,(1,1):20	0:19,1:14	(0,0):52,(0,1):4,(1,0):75,(1,1):95	0:128,1:46	chr18	ENST00000300091.5	C18orf54	A5SS	CDS	NA	no_diff
chr18:5241698:5241888|5241811:+@chr18:5243593:5246771:+	0.86	0.6	0.98	0.75	0.54	0.9	0.11	0.49	(0,0):50,(1,0):12,(1,1):163	0:110,1:65	(0,0):135,(0,1):4,(1,0):22,(1,1):440	0:362,1:104	chr18	ENST00000582363.1	LINC00667	A5SS	UTR3	NA	no_diff
chr10:12867572:12867693|12867689:+@chr10:12870768:12871755:+	0.44	0.26	0.63	0.31	0.19	0.44	0.13	0.56	(0,0):57,(0,1):14,(1,0):11,(1,1):94	0:50,1:69	(0,0):106,(0,1):27,(1,0):12,(1,1):187	0:77,1:149	chr10	ENST00000378847.3	CAMK1D	A5SS	CDS	NA	no_diff
chr10:46135411:46135264|46135199:-@chr10:46121399:46122553:-	0.3	0.07	0.56	0.11	0.02	0.25	0.19	0.75	(0,0):17,(0,1):5,(1,0):3,(1,1):90	0:24,1:74	(0,0):46,(0,1):12,(1,0):2,(1,1):227	0:12,1:229	chr10	ENST00000344646.5	ZFAND4	A5SS	CDS	NA	no_diff
chr10:102795254:102795428|102795377:+@chr10:102795760:102795858:+	0.87	0.65	0.98	0.76	0.48	0.97	0.11	0.45	(0,0):71,(1,0):21,(1,1):28	00:49:00	(0,0):78,(0,1):1,(1,0):11,(1,1):23	0:31,1:4	chr10	ENST00000489434.1	SFXN3	A5SS	CDS	NA	no_diff
chr6:33381186:33381608|33381334:+@chr6:33381818:33381886:+	0.52	0.35	0.72	0.72	0.45	1	-0.2	0.86	(0,0):158,(1,0):57,(1,1):61	0:77,1:41	(0,0):126,(1,0):53,(1,1):41	0:70,1:24	chr6	ENST00000374512.3	PHF1	A5SS	CDS	NA	no_diff
chr12:98992300:98992485|98992479:+@chr12:98993733:98993905:+	0.71	0.5	0.96	0.56	0.37	0.78	0.15	0.62	(0,0):1363,(1,0):23,(1,1):1474	0:1328,1:169	(0,0):1869,(1,0):21,(1,1):1973	0:1486,1:508	chr12	ENST00000401722.3	SLC25A3	A5SS	CDS	NA	no_diff
chr12:2927272:2927519|2927443:+@chr12:2929252:2929391:+	0.13	0.04	0.28	0.26	0.16	0.38	-0.13	0.93	(0,0):42,(0,1):9,(1,0):3,(1,1):55	0:11,1:56	(0,0):164,(0,1):22,(1,0):16,(1,1):78	0:45,1:71	chr12	ENST00000228799.2	ITFG2	A5SS	CDS	NA	no_diff
chr12:56510559:56510714|56510647:+@chr12:56510973:56510995:+	0.34	0.24	0.45	0.46	0.32	0.61	-0.12	0.55	(0,0):3546,(0,1):26,(1,0):38,(1,1):5	0:41,1:28	(0,0):3447,(0,1):13,(1,0):39,(1,1):10	0:46,1:16	chr12	ENST00000546591.1	RPL41	A5SS	CDS	NA	no_diff
chr22:19164206:19164095|19164088:-@chr22:19163934:19164007:-	0.49	0.25	0.72	0.34	0.15	0.57	0.15	0.75	(0,0):1308,(0,1):4,(1,0):9,(1,1):190	0:80,1:123	(0,0):1022,(0,1):4,(1,0):5,(1,1):170	0:58,1:121	chr22	ENST00000215882.5	SLC25A1	A5SS	CDS	NA	no_diff
chr22:45566869:45567058|45567033:+@chr22:45567481:45568488:+	0.77	0.47	0.94	0.6	0.4	0.8	0.17	0.73	(0,0):110,(0,1):1,(1,0):6,(1,1):38	0:32,1:13	(0,0):348,(0,1):10,(1,0):17,(1,1):118	0:94,1:51	chr22	ENST00000347635.3	NUP50	A5SS	CDS	NA	no_diff
chr3:195610028:195612676:-@chr3:195638665:195638816:-	0.7	0.25	0.95	0.76	0.43	0.96	-0.06	0.62	(0,0):67,(1,0):22	00:22:00	(0,0):392,(1,0):74	0.0513889	chr3	ENST00000381916.2	TNK2	AFE	UTR5	ConservedRegion@uORF	no_diff
chr3:129407020:129407500:-,chr3:129389173:129390107:-@chr3:129612337:129612403:-,chr3:129551617:129551669:-,chr3:129546646:129546920:-	0.56	0.44	0.68	0.58	0.49	0.67	-0.02	0.21	(0,0):96,(0,1):19,(1,0):101	0:101,1:19	(0,0):297,(0,1):33,(1,0):193	0:193,1:33	chr3	ENST00000432054.2	TMCC1	AFE	UTR5	NA@ConservedRegion,(CTG)n	no_diff
chr3:184053717:184053911:+,chr3:184055099:184055159:+,chr3:184059854:184060036:+@chr3:184056305:184056317:+,chr3:184059512:184059605:+	0.34	0.21	0.5	0.37	0.21	0.57	-0.03	0.33	(0,0):93,(0,1):10,(1,0):55	0:55,1:10	(0,0):125,(0,1):7,(1,0):41	0:41,1:7	chr3	ENST00000444495.1	EIF2B5	AFE	UTR5	ConservedRegion@ConservedRegion	no_diff
chr3:9867250:9867632:+@chr3:9854932:9855029:+,chr3:9859329:9860604:+,chr3:9862230:9862425:+	0.4	0.24	0.57	0.31	0.2	0.43	0.09	0.39	(0,0):194,(0,1):60,(1,0):8	0:8,1:60	(0,0):389,(0,1):135,(1,0):12	0:12,1:135	chr3	ENST00000427220.1	TTLL3	AFE	UTR5	NA@NA	no_diff
chr3:9867250:9867632:+@chr3:9859329:9862425:+	0.37	0.21	0.54	0.28	0.18	0.39	0.09	0.4	(0,0):49,(0,1):127,(1,0):8	0:8,1:127	(0,0):76,(0,1):309,(1,0):12	0:12,1:309	chr3	ENST00000427220.1	TTLL3	AFE	UTR5	NA@SF2	no_diff
chr3:51995176:51995652:-,chr3:51995026:51995049:-,chr3:51994542:51994914:-@chr3:52001342:52001469:-,chr3:51996826:51996908:-,chr3:51995176:51995320:-	0.81	0.66	0.95	0.87	0.69	0.99	-0.06	0.3	(0,0):114,(0,1):2,(1,0):59,(1,1):17	0:71,1:7	(0,0):123,(1,0):49,(1,1):19	0:67,1:1	chr3	ENST00000355852.2	PCBP4	AFE	UTR5	ConservedRegion,uORF@ConservedRegion,uORF,IRES,MIRb,(CCG)n	no_diff
chr3:98239977:98240281:-@chr3:98241693:98241910:-,chr3:98239977:98240286:-	0.59	0.44	0.7	0.59	0.49	0.68	0	0.2	(0,0):88,(0,1):60,(1,1):156	0:106,1:110	(0,0):160,(0,1):102,(1,1):264	0:163,1:203	chr3	ENST00000341181.6	CLDND1	AFE	UTR5	NA@SF2,ConservedRegion,GC_rich,IRES,uORF	no_diff
chr3:128840129:128840619:-@chr3:128879816:128880029:-	0.5	0.36	0.64	0.43	0.32	0.54	0.07	0.29	(0,0):1386,(0,1):15,(1,0):44	0:44,1:15	(0,0):1453,(0,1):22,(1,0):48	0:48,1:22	chr3	ENST00000315150.5	RAB43	AFE	UTR5	(CCGGG)n,IRES@IRES	no_diff
chr3:10362193:10362745:-,chr3:10359734:10359778:-@chr3:10362734:10362855:-	0.64	0.4	0.9	0.7	0.44	0.93	-0.06	0.45	(0,0):424,(0,1):3,(1,0):54	0:54,1:3	(0,0):391,(0,1):2,(1,0):53	0:53,1:2	chr3	ENST00000397109.3	SEC13	AFE	UTR5	ConservedRegion,uORF,IRES,MIR@ConservedRegion,IRES	no_diff
chr3:51995176:51995652:-,chr3:51995026:51995049:-,chr3:51994542:51994914:-@chr3:51996826:51996908:-,chr3:51995176:51995320:-	0.7	0.45	0.93	0.65	0.39	0.94	0.05	0.58	(0,0):106,(0,1):1,(1,0):59,(1,1):17	0:70,1:7	(0,0):105,(1,0):49,(1,1):19	0:60,1:8	chr3	ENST00000355852.2	PCBP4	AFE	UTR5	ConservedRegion,uORF@SF2,uORF,TOP,IRES,MIRb	no_diff
chr3:51995176:51995652:-,chr3:51995026:51995049:-,chr3:51994542:51994914:-@chr3:52001342:52001469:-,chr3:51995176:51995320:-	0.73	0.5	0.96	0.64	0.46	0.86	0.09	0.51	(0,0):114,(0,1):2,(1,0):59,(1,1):17	0:76,1:2	(0,0):121,(0,1):2,(1,0):49,(1,1):19	0:59,1:11	chr3	ENST00000355852.2	PCBP4	AFE	UTR5	ConservedRegion,uORF@ConservedRegion,uORF,IRES,MIRb,(CCG)n	no_diff
chr12:122263106:122263272:+,chr12:122265425:122265556:+@chr12:122242086:122242139:+,chr12:122242630:122242817:+	0.75	0.56	0.89	0.75	0.65	0.84	0	0.26	(0,0):623,(0,1):5,(1,0):23	0:23,1:5	(0,0):1780,(0,1):18,(1,0):73	0:73,1:18	chr12	ENST00000542440	ENSG00000139718	AFE	UTR5	NA@NA	no_diff
chr12:89918897:89919340:-,chr12:89885713:89885892:-@chr12:89919658:89919777:-	0.38	0.17	0.67	0.38	0.24	0.57	0	0.42	(0,0):181,(0,1):4,(1,0):22	0:22,1:4	(0,0):611,(0,1):10,(1,0):65	0:65,1:10	chr12	ENST00000393179.4	POC1B	AFE	UTR5	NA@ConservedRegion,C-rich	no_diff
chr12:109536007:109536443:+@chr12:109535415:109535616:+	0.47	0.41	0.53	0.43	0.38	0.48	0.04	0.17	(0,0):239,(0,1):79,(1,0):196	0:196,1:79	(0,0):261,(0,1):109,(1,0):230	0:230,1:109	chr12	ENST00000242576.2	UNG	AFE	UTR5	SF2@NA	no_diff
chr12:123459354:123459668:+,chr12:123460358:123460414:+,chr12:123460800:123460948:+@chr12:123459778:123459930:+	0.55	0.39	0.73	0.46	0.32	0.61	0.09	0.39	(0,0):58,(0,1):9,(1,0):59	0:59,1:9	(0,0):78,(0,1):13,(1,0):59	0:59,1:13	chr12	ENST00000542678.1	ABCB9	AFE	UTR5	uORF@ConservedRegion,uORF	no_diff
chr12:123459354:123459668:+,chr12:123460358:123460414:+,chr12:123461201:123461314:+,chr12:123461418:123461517:+,chr12:123462989:123463116:+@chr12:123459778:123459930:+	0.71	0.58	0.83	0.63	0.51	0.75	0.08	0.37	(0,0):126,(0,1):9,(1,0):194	0:194,1:9	(0,0):153,(0,1):13,(1,0):181	0:181,1:13	chr12	ENST00000542678.1	ABCB9	AFE	UTR5	ConservedRegion,IRES,uORF@ConservedRegion,uORF	no_diff
chr12:9572577:9572677:-@chr12:9600578:9600824:-,chr12:9596131:9596278:-	0.46	0.22	0.66	0.42	0.24	0.6	0.04	0.44	(0,0):389,(0,1):50,(1,0):4	0:4,1:50	(0,0):955,(0,1):113,(1,0):7	0:7,1:113	chr12	ENST00000290818	ENSG00000214826	AFE	UTR5	SF2@uORF	no_diff
chr12:123459354:123459668:+,chr12:123460358:123461314:+,chr12:123461418:123461517:+,chr12:123462989:123463116:+@chr12:123459778:123459930:+	0.53	0.36	0.7	0.46	0.34	0.62	0.07	0.39	(0,0):140,(0,1):9,(1,0):180	0:180,1:9	(0,0):145,(0,1):13,(1,0):189	0:189,1:13	chr12	ENST00000542678.1	ABCB9	AFE	UTR5	ConservedRegion,IRES,uORF@ConservedRegion,uORF	no_diff
chr12:123459354:123459668:+,chr12:123461201:123461314:+,chr12:123461418:123461517:+,chr12:123462989:123463116:+@chr12:123459778:123459930:+	0.69	0.56	0.83	0.61	0.49	0.74	0.08	0.36	(0,0):170,(0,1):9,(1,0):150	0:150,1:9	(0,0):181,(0,1):13,(1,0):153	0:153,1:13	chr12	ENST00000542678.1	ABCB9	AFE	UTR5	ConservedRegion,IRES,uORF@ConservedRegion,uORF	no_diff
chr12:50189321:50189429:-@chr12:50222105:50222208:-,chr12:50199763:50199824:-,chr12:50197705:50197863:-	0.63	0.43	0.78	0.69	0.6	0.77	-0.06	0.29	(0,0):479,(0,1):29,(1,0):8	0:8,1:29	(0,0):1124,(0,1):105,(1,0):34	0:34,1:105	chr12	ENST00000433948.1	NCKAP5L	AFE	UTR5	NA@NA	no_diff
chr5:102465010:102465407:+@chr5:102455958:102456192:+	0.57	0.38	0.76	0.52	0.45	0.6	0.05	0.3	(0,0):7,(0,1):8,(1,0):20	0:20,1:8	(0,0):54,(0,1):55,(1,0):118	0:118,1:55	chr5	ENST00000358359.3	PPIP5K2	AFE	UTR5	AluSx,ConservedRegion,IRES,uORF@uORF,UNR-bs	no_diff
chr5:70363321:70363500:+,chr5:70358535:70358623:+@chr5:68874835:68874935:+	0.55	0.37	0.77	0.53	0.39	0.67	0.02	0.35	(0,0):8585,(0,1):5,(1,0):43	0:43,1:5	(0,0):17411,(0,1):12,(1,0):100	0:100,1:12	chr5	ENST00000274400.5	GTF2H2	AFE	UTR5	SF2@NA	no_diff
chr5:68874835:68874935:-@chr5:70363321:70363500:-,chr5:70360952:70361049:-,chr5:70358535:70358623:-	0.47	0.26	0.67	0.46	0.32	0.58	0.01	0.31	(0,0):8562,(0,1):66,(1,0):5	0:5,1:66	(0,0):17359,(0,1):152,(1,0):12	0:12,1:152	chr5	ENST00000502619.1	GTF2H2C	AFE	UTR5	NA@SF2	no_diff
chr5:148741616:148743773:+@chr5:148737634:148737735:+	0.63	0.28	0.93	0.6	0.3	0.89	0.03	0.65	(0,0):34,(1,0):47	00:47:00	(0,0):137,(0,1):1,(1,0):104	0:104,1:1	chr5	ENST00000274569.4	PCYOX1L	AFE	UTR5	ConservedRegion,IRES,uORF,MIR3,Charlie18a,MIRb,MER58A,L1MC4a,UNR-bs@NA	no_diff
chr5:69711198:69711377:-,chr5:69716076:69716164:-@chr5:70363321:70363500:-,chr5:70358535:70358623:-	0.49	0.38	0.59	0.41	0.34	0.49	0.08	0.31	(0,0):5108,(0,1):43,(1,0):41	0:41,1:43	(0,0):10435,(0,1):100,(1,0):70	0:70,1:100	chr5	ENST00000513202.1	GTF2H2B	AFE	UTR5	SF2@SF2	no_diff
chr5:156929811:156929988:-@chr5:157002611:157002768:-,chr5:156997903:156997988:-,chr5:156991381:156991451:-,chr5:156964921:156964999:-,chr5:156957815:156957891:-,chr5:156946847:156947039:-,chr5:156945831:156945896:-,chr5:156940432:156940513:-,chr5:156936309:156936475:-	0.53	0.3	0.77	0.5	0.33	0.64	0.03	0.36	(0,0):20,(0,1):31,(1,0):4	0:4,1:31	(0,0):64,(0,1):76,(1,0):9	0:9,1:76	chr5	ENST00000517951.1	ADAM19	AFE	UTR5	ConservedRegion@ConservedRegion,IRES	no_diff
chr5:68856051:68856230:-,chr5:68860927:68861015:-@chr5:70363321:70363500:-,chr5:70360952:70361049:-,chr5:70358535:70358623:-	0.46	0.36	0.55	0.42	0.35	0.48	0.04	0.19	(0,0):8847,(0,1):66,(1,0):37	0:37,1:66	(0,0):17944,(0,1):152,(1,0):72	0:72,1:152	chr5	ENST00000502619.1	GTF2H2C	AFE	UTR5	SF2@SF2	no_diff
chr5:68856051:68856230:-,chr5:68860927:68861015:-@chr5:70363321:70363500:-,chr5:70358535:70358623:-	0.46	0.35	0.57	0.42	0.35	0.49	0.04	0.21	(0,0):8870,(0,1):43,(1,0):37	0:37,1:43	(0,0):17996,(0,1):100,(1,0):72	0:72,1:100	chr5	ENST00000502619.1	GTF2H2C	AFE	UTR5	SF2@SF2	no_diff
chr5:148741616:148743773:+@chr5:148737609:148737719:+	0.71	0.4	0.96	0.67	0.35	0.92	0.04	0.52	(0,0):34,(1,0):47	00:47:00	(0,0):137,(0,1):1,(1,0):104	0:104,1:1	chr5	ENST00000274569.4	PCYOX1L	AFE	UTR5	ConservedRegion,IRES,uORF,MIR3,Charlie18a,MIRb,MER58A,L1MC4a,UNR-bs@NA	no_diff
chr5:177652356:177653080:-,chr5:177651643:177651730:-,chr5:177651449:177651565:-,chr5:177649853:177649935:-,chr5:177649356:177649493:-@chr5:177659493:177659786:-	0.77	0.59	0.89	0.78	0.63	0.9	-0.01	0.28	(0,0):275,(0,1):4,(1,0):71	0:71,1:4	(0,0):482,(0,1):5,(1,0):100	0:100,1:5	chr5	ENST00000308158.5	AGXT2L2	AFE	UTR5	ConservedRegion,uORF@NA	no_diff
chr5:177652356:177653080:-,chr5:177651643:177651730:-,chr5:177651449:177651565:-,chr5:177649853:177649935:-,chr5:177649356:177649493:-@chr5:177658670:177659792:-,chr5:177658406:177658524:-	0.68	0.59	0.76	0.7	0.63	0.77	-0.02	0.16	(0,0):243,(0,1):36,(1,0):71	0:71,1:36	(0,0):441,(0,1):46,(1,0):100	0:100,1:46	chr5	ENST00000308158.5	AGXT2L2	AFE	UTR5	ConservedRegion,uORF@NA	no_diff
chr22:47033737:47033857:+@chr22:47022648:47022858:+	0.41	0.2	0.61	0.46	0.33	0.58	-0.05	0.36	(0,0):36,(0,1):23,(1,0):5	0:5,1:23	(0,0):47,(0,1):56,(1,0):17	0:17,1:56	chr22	ENST00000406902.1	GRAMD4	AFE	UTR5	NA@ConservedRegion,IRES,MER63D	no_diff
chr22:18376574:18376670:-@chr22:18385397:18385513:-,chr22:18384644:18384745:-,chr22:18383608:18383763:-,chr22:18382214:18382314:-	0.43	0.11	0.69	0.49	0.33	0.64	-0.06	0.43	(0,0):82,(0,1):41,(1,0):2	0:2,1:41	(0,0):291,(0,1):156,(1,0):9	0:9,1:156	chr22	ENST00000400561.2	MICAL3	AFE	UTR5	NA@NA	no_diff
chr22:18376574:18376670:-@chr22:18389315:18389652:-	0.39	0.14	0.63	0.47	0.29	0.62	-0.08	0.42	(0,0):165,(0,1):41,(1,0):2	0:2,1:41	(0,0):593,(0,1):113,(1,0):9	0:9,1:113	chr22	ENST00000400561.2	MICAL3	AFE	UTR5	NA@IRES	no_diff
chr22:18376574:18376670:-@chr22:18484159:18484267:-,chr22:18389315:18389652:-,chr22:18387398:18387605:-,chr22:18385397:18385513:-,chr22:18384644:18384745:-,chr22:18383608:18383763:-,chr22:18379490:18379747:-	0.45	0.2	0.69	0.49	0.32	0.63	-0.04	0.43	(0,0):78,(0,1):133,(1,0):2	0:2,1:133	(0,0):292,(0,1):463,(1,0):9	0:9,1:463	chr22	ENST00000400561.2	MICAL3	AFE	UTR5	NA@IRES	no_diff
chr22:21350252:21350401:+@chr22:21341793:21341872:+	0.58	0.35	0.84	0.58	0.36	0.82	0	0.47	(0,0):602,(0,1):2,(1,0):34	0:34,1:2	(0,0):1606,(0,1):4,(1,0):63	0:63,1:4	chr22	ENST00000215739.8	LZTR1	AFE	UTR5	ConservedRegion@NA	no_diff
chr22:21341793:21341872:+@chr22:21336558:21336860:+	0.7	0.41	0.91	0.68	0.45	0.84	0.02	0.42	(0,0):57,(0,1):21,(1,0):2	0:2,1:21	(0,0):184,(0,1):55,(1,0):4	0:4,1:55	chr22	ENST00000215739.8	LZTR1	AFE	UTR5	NA@ConservedRegion,IRES	no_diff
chr22:29939418:29939531:-@chr22:29949660:29949736:-,chr22:29946717:29946832:-,chr22:29945041:29945147:-	0.67	0.59	0.75	0.76	0.69	0.81	-0.09	0.46	(0,0):272,(0,1):105,(1,0):40	0:40,1:105	(0,0):425,(0,1):98,(1,0):55	0:55,1:98	chr22	ENST00000490103.1	THOC5	AFE	UTR5	SF2@SF2,ConservedRegion,IRES,uORF	no_diff
chr21:38739859:38739930:+,chr21:38844986:38845182:+@chr21:38792601:38792686:+	0.69	0.42	0.96	0.7	0.47	0.93	-0.01	0.44	(0,0):40,(0,1):1,(1,0):42	0:42,1:1	(0,0):113,(0,1):2,(1,0):94	0:94,1:2	chr21	ENST00000462274.1	DYRK1A	AFE	UTR5	FRAM,G-rich@ConservedRegion	no_diff
chr21:44524425:44525362:-,chr21:44520563:44520629:-,chr21:44515804:44515853:-@chr21:44527561:44527688:-	0.6	0.53	0.67	0.66	0.59	0.73	-0.06	0.23	(0,0):1703,(0,1):43,(1,0):1162	0:1162,1:43	(0,0):2170,(0,1):38,(1,0):1344	0:1344,1:38	chr21	ENST00000459639.1	U2AF1	AFE	UTR5	ConservedRegion,uORF@(CGG)n,IRES,uORF	no_diff
chr11:47270467:47270550:+,chr11:47281342:47281530:+@chr11:47280731:47280810:+	0.65	0.31	0.96	0.72	0.3	0.97	-0.07	0.75	(0,0):37,(1,0):20	00:20:00	(0,0):59,(1,0):29	00:29:00	chr11	ENST00000527464.1	NR1H3	AFE	UTR5	SF2@IRES	no_diff
chr11:62378559:62378816:-,chr11:62378351:62378464:-,chr11:62378108:62378240:-,chr11:62377101:62377168:-,chr11:62376826:62376949:-@chr11:62378897:62379068:-	0.56	0.29	0.83	0.6	0.45	0.8	-0.04	0.49	(0,0):16,(0,1):3,(1,0):19	0:19,1:3	(0,0):41,(0,1):7,(1,0):65	0:65,1:7	chr11	ENST00000394773.2	EML3	AFE	UTR5	NA@NA	no_diff
chr11:1502001:1502115:-,chr11:1501623:1501716:-@chr11:1785475:1785501:-,chr11:1501955:1502115:-	0.34	0.24	0.46	0.35	0.23	0.5	-0.01	0.22	(0,0):3398,(0,1):41,(1,0):25,(1,1):17	0:32,1:51	(0,0):6781,(0,1):29,(1,0):19,(1,1):16	0:27,1:37	chr11	ENST00000329957.6	MOB2	AFE	UTR5	NA@NA	no_diff
chr11:3829784:3829881:+,chr11:3845113:3845365:+,chr11:3845500:3845606:+@chr11:3829272:3829317:+,chr11:3829524:3829545:+,chr11:3832480:3832654:+	0.69	0.6	0.77	0.69	0.6	0.78	0	0.15	(0,0):132,(0,1):28,(1,0):143	0:143,1:28	(0,0):162,(0,1):27,(1,0):139	0:139,1:27	chr11	ENST00000528216.1	PGAP2	AFE	UTR5	IRES,ConservedRegion@uORF	no_diff
chr11:47587129:47587348:+,chr11:47587458:47587538:+,chr11:47593023:47593295:+,chr11:47602077:47602536:+@chr11:47600632:47600710:+	0.9	0.73	0.99	0.84	0.64	0.97	0.06	0.27	(0,0):2057,(1,0):1093	0.759028	(0,0):2184,(1,0):778	0.540278	chr11	ENST00000426530.2	PTPMT1	AFE	UTR5	IRES,SF2,ConservedRegion@NA	no_diff
chr11:66278119:66278177:+@chr11:66276550:66276785:+	0.39	0.01	0.9	0.33	0.06	0.82	0.06	0.85	(0,0):77,(0,1):44	0:0,1:44	(0,0):446,(0,1):182	0:0,1:182	chr11	ENST00000526760.1	BBS1	AFE	UTR5	NA@ConservedRegion,MIRc	no_diff
chr19:15483662:15484151:-,chr19:15483029:15483158:-,chr19:15482763:15482809:-,chr19:15480957:15480990:-,chr19:15479878:15480035:-,chr19:15479046:15479133:-,chr19:15472921:15473062:-,chr19:15472540:15472633:-@chr19:15490524:15490603:-	0.67	0.33	0.96	0.73	0.49	0.91	-0.06	0.52	(0,0):174,(1,0):234	0.1625	(0,0):493,(0,1):1,(1,0):704	0:704,1:1	chr19	ENST00000269701.1	AKAP8	AFE	UTR5	GA-rich,ConservedRegion@ConservedRegion	no_diff
chr19:11303507:11304718:-@chr19:11305151:11305266:-	0.5	0.27	0.85	0.55	0.4	0.73	-0.05	0.45	(0,0):37,(0,1):2,(1,0):57	0:57,1:2	(0,0):145,(0,1):9,(1,0):278	0:278,1:9	chr19	ENST00000586659.1	KANK2	AFE	UTR5	NA@NA	no_diff
chr19:4182208:4182276:-,chr19:4180779:4180906:-,chr19:4179101:4179283:-@chr19:4182471:4182596:-	0.79	0.64	0.92	0.76	0.62	0.87	0.03	0.29	(0,0):94,(0,1):4,(1,0):100	0:100,1:4	(0,0):115,(0,1):7,(1,0):133	0:133,1:7	chr19	ENST00000337491.1	SIRT6	AFE	UTR5	NA@ConservedRegion	no_diff
chr19:18586624:18586745:-,chr19:18583645:18583692:-,chr19:18576607:18576728:-,chr19:18576222:18576385:-@chr19:18632731:18632918:-	0.41	0.3	0.54	0.46	0.38	0.55	-0.05	0.24	(0,0):33,(0,1):21,(1,0):47	0:47,1:21	(0,0):78,(0,1):39,(1,0):109	0:109,1:39	chr19	ENST00000262809.3	ELL	AFE	UTR5	NA@ConservedRegion	no_diff
chr19:7709399:7709638:+@chr19:7701991:7702072:+,chr19:7703905:7703986:+	0.75	0.64	0.85	0.69	0.61	0.78	0.06	0.25	(0,0):927,(0,1):11,(1,0):64	0:64,1:11	(0,0):1618,(0,1):25,(1,0):104	0:104,1:25	chr19	ENST00000221283.4	STXBP2	AFE	UTR5	ConservedRegion@ConservedRegion	no_diff
chr19:12248473:12248544:-,chr19:12246584:12246710:-@chr19:12267371:12267529:-,chr19:12258491:12258617:-,chr19:12258210:12258270:-,chr19:12253456:12253530:-,chr19:12250995:12251140:-	0.24	0.07	0.47	0.31	0.16	0.45	-0.07	0.38	(0,0):138,(0,1):31,(1,0):2	0:2,1:31	(0,0):442,(0,1):71,(1,0):8	0:8,1:71	chr19	ENST00000334213.5	ZNF20	AFE	UTR5	SF2@SF2,ConservedRegion,IRES,uORF	no_diff
chr19:8577913:8578233:-@chr19:8578928:8579032:-	0.63	0.47	0.79	0.57	0.39	0.75	0.06	0.37	(0,0):116,(0,1):7,(1,0):98	0:98,1:7	(0,0):96,(0,1):8,(1,0):86	0:86,1:8	chr19	ENST00000393927.3	ZNF414	AFE	UTR5	NA@NA	no_diff
chr19:50333043:50333205:+@chr19:50321546:50321732:+	0.67	0.52	0.81	0.63	0.56	0.7	0.04	0.23	(0,0):283,(0,1):18,(1,0):29	0:29,1:18	(0,0):804,(0,1):69,(1,0):95	0:95,1:69	chr19	ENST00000312865.5	MED25	AFE	UTR5	NA@NA	no_diff
chr19:49310257:49311049:-,chr19:49309774:49309974:-@chr19:49314241:49314301:-	0.46	0.08	0.98	0.42	0.05	0.91	0.04	0.78	(0,0):365,(1,0):240	0.166667	(0,0):458,(1,0):323	0.224306	chr19	ENST00000316273.5	BCAT2	AFE	UTR5	AluSx1,ConservedRegion@NA	no_diff
chr14:57698224:57699090:-@chr14:57735340:57735617:-	0.43	0.29	0.58	0.48	0.4	0.57	-0.05	0.28	(0,0):271,(0,1):13,(1,0):36	0:36,1:13	(0,0):1145,(0,1):40,(1,0):141	0:141,1:40	chr14	ENST00000413566.2	EXOC5	AFE	UTR5	NA@ConservedRegion,uORF	no_diff
chr14:90754561:90755489:-@chr14:90798185:90798279:-	0.6	0.27	0.92	0.59	0.37	0.81	0.01	0.58	(0,0):176,(0,1):1,(1,0):51	0:51,1:1	(0,0):769,(0,1):3,(1,0):221	0:221,1:3	chr14	ENST00000354366.3	C14orf102	AFE	UTR5	SF2,ConservedRegion@ConservedRegion,uORF	no_diff
chr14:90778738:90778887:-,chr14:90770279:90770726:-,chr14:90767583:90767716:-@chr14:90798185:90798279:-	0.63	0.28	0.95	0.68	0.46	0.88	-0.05	0.66	(0,0):68,(0,1):1,(1,0):61	0:61,1:1	(0,0):310,(0,1):3,(1,0):210	0:210,1:3	chr14	ENST00000354366.3	C14orf102	AFE	UTR5	ConservedRegion@ConservedRegion,uORF	no_diff
chr14:93676162:93676303:+,chr14:93676994:93677054:+,chr14:93678378:93678473:+,chr14:93681275:93681328:+@chr14:93673401:93673786:+	0.64	0.57	0.7	0.57	0.52	0.62	0.07	0.38	(0,0):135,(0,1):85,(1,0):135	0:135,1:85	(0,0):213,(0,1):167,(1,0):199	0:199,1:167	chr14	ENST00000013070.6	UBR7	AFE	UTR5	NA@ConservedRegion,IRES	no_diff
chr14:21898960:21899355:-,chr14:21897123:21897494:-@chr14:21905353:21905404:-,chr14:21899970:21900017:-	0.73	0.37	0.97	0.78	0.63	0.91	-0.05	0.5	(0,0):68,(1,0):47	00:47:00	(0,0):596,(0,1):5,(1,0):502	0:502,1:5	chr14	ENST00000430710.3	CHD8	AFE	UTR5	NA@NA	no_diff
chr14:24911552:24911658:-,chr14:24911384:24911466:-@chr14:24911960:24912007:-	0.44	0.02	0.85	0.37	0.01	0.92	0.07	0.69	(0,0):107,(1,0):79	0.0548611	(0,0):82,(1,0):74	0.0513889	chr14	ENST00000544691.2	SDR39U1	AFE	UTR5	IRES,ConservedRegion,uORF@NA	no_diff
chr14:78325398:78325622:+@chr14:78266474:78266513:+,chr14:78285311:78285456:+	0.29	0.14	0.49	0.25	0.15	0.38	0.04	0.29	(0,0):33,(0,1):14,(1,0):7	0:7,1:14	(0,0):65,(0,1):32,(1,0):14	0:14,1:32	chr14	ENST00000238561.5	ADCK1	AFE	UTR5	NA@IRES	no_diff
chr6:33747877:33748076:-@chr6:33756158:33756896:-	0.34	0.16	0.53	0.41	0.25	0.57	-0.07	0.4	(0,0):496,(0,1):46,(1,0):4	0:4,1:46	(0,0):845,(0,1):70,(1,0):10	0:10,1:70	chr6	ENST00000293760.5	LEMD2	AFE	UTR5	NA@SF2,GC_rich,ConservedRegion,uORF	no_diff
chr6:170064866:170064950:-,chr6:170064262:170064382:-@chr6:170101647:170102159:-,chr6:170088913:170089108:-	0.46	0.27	0.64	0.51	0.36	0.64	-0.05	0.34	(0,0):177,(0,1):34,(1,0):6	0:6,1:34	(0,0):362,(0,1):55,(1,0):12	0:12,1:55	chr6	ENST00000448612.1	WDR27	AFE	UTR5	NA@NA	no_diff
chr6:167369585:167370077:-@chr6:167370437:167370679:-,chr6:167356507:167356577:-,chr6:167352084:167352496:-	0.44	0.36	0.52	0.46	0.38	0.54	-0.02	0.17	(0,0):342,(0,1):100,(1,0):50	0:50,1:100	(0,0):376,(0,1):90,(1,0):48	0:48,1:90	chr6	ENST00000508775.1	RNASET2	AFE	UTR5	IRES,TOP@NA	no_diff
chr6:167369585:167370077:-,chr6:167365976:167366036:-,chr6:167362058:167362113:-,chr6:167360170:167360227:-,chr6:167356507:167357297:-@chr6:167370437:167370679:-,chr6:167356507:167356577:-,chr6:167352084:167352496:-	0.45	0.39	0.52	0.51	0.44	0.57	-0.06	0.23	(0,0):216,(0,1):100,(1,0):176	0:176,1:100	(0,0):229,(0,1):90,(1,0):195	0:195,1:90	chr6	ENST00000508775.1	RNASET2	AFE	UTR5	IRES,TOP@L1MC2,ConservedRegion	no_diff
chr6:31864383:31864601:-,chr6:31864040:31864293:-,chr6:31861139:31861439:-,chr6:31860603:31860687:-@chr6:31865413:31865464:-	0.45	0.03	0.91	0.5	0.06	0.89	-0.05	0.92	(0,0):87,(1,0):193	0.134028	(0,0):326,(1,0):539	0.374306	chr6	ENST00000395728.3	EHMT2	AFE	UTR5	SF2,AluJr@(CGG)n,ConservedRegion	no_diff
chr6:35436576:35436650:+,chr6:35436724:35437306:+@chr6:35436178:35436216:+	0.53	0.04	0.95	0.58	0.13	0.98	-0.05	0.75	(0,0):4350,(1,0):3697	2.56736	(0,0):3541,(1,0):3046	2.11528	chr6	ENST00000322203.6	RPL10A	AFE	UTR5	SF2,ConservedRegion@NA	no_diff
chrX:15349712:15350114:-,chrX:15344036:15344168:-,chrX:15343142:15343274:-@chrX:15353623:15353660:-,chrX:15349712:15350114:-	0.46	0.3	0.65	0.47	0.37	0.59	-0.01	0.28	(0,0):73,(0,1):8,(1,0):22,(1,1):41	0:43,1:28	(0,0):213,(0,1):17,(1,0):58,(1,1):115	0:123,1:67	chrX	ENST00000542278.1	PIGA	AFE	UTR5	ConservedRegion,uORF@ConservedRegion,uORF	no_diff
chrX:9651431:9652228:+@chrX:9431335:9431502:+,chrX:9469820:9469889:+,chrX:9608313:9608400:+,chrX:9621585:9621729:+	0.27	0.15	0.42	0.23	0.15	0.32	0.04	0.24	(0,0):86,(0,1):19,(1,0):12	0:12,1:19	(0,0):181,(0,1):38,(1,0):19	0:19,1:38	chrX	ENST00000407597.2	TBL1X	AFE	UTR5	NA@ConservedRegion,uORF,L1MB1	no_diff
chrX:9651431:9652228:+@chrX:9431335:9431502:+,chrX:9469820:9469889:+,chrX:9608313:9608400:+,chrX:9622255:9622362:+	0.15	0.08	0.23	0.13	0.08	0.18	0.02	0.13	(0,0):67,(0,1):38,(1,0):12	0:12,1:38	(0,0):151,(0,1):68,(1,0):19	0:19,1:68	chrX	ENST00000407597.2	TBL1X	AFE	UTR5	NA@ConservedRegion,uORF,L1MB1	no_diff
chrX:9651431:9652228:+@chrX:9433039:9433487:+,chrX:9469820:9469889:+,chrX:9608313:9608400:+,chrX:9621585:9621729:+	0.34	0.2	0.49	0.29	0.19	0.39	0.05	0.3	(0,0):81,(0,1):24,(1,0):12	0:12,1:24	(0,0):171,(0,1):47,(1,0):19	0:19,1:47	chrX	ENST00000407597.2	TBL1X	AFE	UTR5	NA@GC_rich,uORF,L1MB1	no_diff
chrX:11777761:11777994:+,chrX:11778522:11778617:+,chrX:11778956:11779056:+,chrX:11779619:11779701:+,chrX:11780249:11780371:+@chrX:11776278:11776484:+	0.7	0.61	0.79	0.68	0.6	0.75	0.02	0.17	(0,0):66,(0,1):21,(1,0):209	0:209,1:21	(0,0):99,(0,1):33,(1,0):297	0:297,1:33	chrX	ENST00000312196.4	MSL3	AFE	UTR5	NA@ConservedRegion,(CCCCG)n	no_diff
chrX:9651431:9652228:+@chrX:9431335:9431502:+,chrX:9469820:9469889:+,chrX:9502940:9503074:+,chrX:9608313:9608400:+,chrX:9622255:9622362:+	0.23	0.13	0.35	0.22	0.15	0.31	0.01	0.18	(0,0):77,(0,1):28,(1,0):12	0:12,1:28	(0,0):171,(0,1):48,(1,0):19	0:19,1:48	chrX	ENST00000407597.2	TBL1X	AFE	UTR5	NA@ConservedRegion,uORF,L1MB1	no_diff
chrX:48456604:48457345:+@chrX:48455895:48456002:+,chrX:48456346:48456425:+	0.63	0.49	0.78	0.67	0.52	0.81	-0.04	0.31	(0,0):208,(0,1):10,(1,0):99	0:99,1:10	(0,0):215,(0,1):8,(1,0):94	0:94,1:8	chrX	ENST00000218056.5	WDR13	AFE	UTR5	NA@ConservedRegion	no_diff
chr8:144919795:144920246:-@chr8:144921681:144922202:-,chr8:144921486:144921580:-,chr8:144921344:144921367:-,chr8:144921189:144921272:-,chr8:144921055:144921110:-	0.31	0.13	0.53	0.34	0.16	0.54	-0.03	0.36	(0,0):23,(0,1):18,(1,0):4	0:4,1:18	(0,0):38,(0,1):22,(1,0):6	0:6,1:22	chr8	ENST00000533093.1	NRBP2	AFE	UTR5	NA@ConservedRegion,uORF	no_diff
chr20:62710647:62710845:-,chr20:62707878:62707999:-@chr20:62710976:62711181:-,chr20:62708210:62708307:-	0.87	0.69	0.98	0.86	0.69	0.96	0.01	0.24	(0,0):53,(0,1):2,(1,0):18	0:18,1:2	(0,0):61,(0,1):2,(1,0):22	0:22,1:2	chr20	ENST00000395042.1	RGS19	AFE	UTR5	ConservedRegion@ConservedRegion,IRES	no_diff
chr20:33981895:33982103:-,chr20:33971841:33971936:-@chr20:33999743:33999833:-	0.79	0.57	0.95	0.87	0.64	0.98	-0.08	0.43	(0,0):131,(0,1):2,(1,0):118	0:118,1:2	(0,0):194,(1,0):113	0.0784722	chr20	ENST00000457259.1	UQCC	AFE	UTR5	ConservedRegion,uORF@ConservedRegion	no_diff
chr20:40041964:40043705:-,chr20:40040784:40040903:-,chr20:40031170:40034129:-@chr20:40076522:40076611:-	0.66	0.24	0.98	0.58	0.33	0.91	0.08	0.93	(0,0):111,(1,0):81	0.05625	(0,0):1102,(0,1):2,(1,0):794	0:794,1:2	chr20	ENST00000373233.3	CHD6	AFE	UTR5	ConservedRegion,BRD-BOX,PAS@NA	no_diff
chr9:139917154:139917512:-,chr9:139916803:139916930:-,chr9:139916343:139916453:-@chr9:139917393:139918292:-	0.53	0.34	0.69	0.59	0.47	0.71	-0.06	0.32	(0,0):12,(0,1):17,(1,0):11,(1,1):1	0:11,1:18	(0,0):14,(0,1):30,(1,0):26,(1,1):10	0:29,1:37	chr9	ENST00000459850.1	ABCA2	AFE	UTR5	ConservedRegion,GY-BOX@NA	no_diff
chr9:139310519:139311666:+@chr9:139305116:139305191:+	0.39	0.14	0.69	0.43	0.19	0.75	-0.04	0.56	(0,0):706,(0,1):1,(1,0):219	0:219,1:1	(0,0):1820,(0,1):2,(1,0):598	0:598,1:2	chr9	ENST00000371717.3	PMPCA	AFE	UTR5	SF2,ConservedRegion,PAS,AluJb@ConservedRegion	no_diff
chr9:137298428:137299338:+,chr9:137299995:137300145:+@chr9:137218410:137218505:+	0.62	0.26	0.93	0.71	0.43	0.94	-0.09	0.77	(0,0):98,(1,0):21	00:21:00	(0,0):234,(1,0):71	0.0493056	chr9	ENST00000481739.1	RXRA	AFE	UTR5	NA@ConservedRegion,GC_rich,IRES	no_diff
chr9:136216399:136216555:+,chr9:136216767:136216907:+,chr9:136217095:136217174:+,chr9:136217452:136217582:+@chr9:136215069:136215101:+	0.53	0.16	0.95	0.51	0.1	0.96	0.02	0.69	(0,0):9222,(1,0):20133	0:20133	(0,0):7813,(1,0):16914	0:16914	chr9	ENST00000323345.6	RPL7A	AFE	UTR5	SF2,ConservedRegion,SF2SAN_487@ConservedRegion	no_diff
chr9:32989757:32990086:-,chr9:32988077:32988122:-,chr9:32987542:32987840:-@chr9:33001565:33001626:-,chr9:32989757:32989893:-	0.37	0.3	0.45	0.41	0.34	0.49	-0.04	0.19	(0,0):259,(0,1):26,(1,0):217,(1,1):106	0:257,1:92	(0,0):258,(0,1):23,(1,0):237,(1,1):103	0:275,1:88	chr9	ENST00000379825.2	APTX	AFE	UTR5	IRES,ConservedRegion,uORF@TOP,IRES,uORF,MIR	no_diff
chr9:32989757:32990086:-,chr9:32988081:32988122:-,chr9:32987542:32987729:-,chr9:32985969:32986028:-@chr9:33001514:33001563:-,chr9:32989757:32989893:-	0.53	0.42	0.65	0.54	0.42	0.68	-0.01	0.22	(0,0):357,(0,1):3,(1,0):228,(1,1):106	0:285,1:52	(0,0):385,(0,1):1,(1,0):213,(1,1):103	0:267,1:50	chr9	ENST00000379825.2	APTX	AFE	UTR5	IRES,ConservedRegion,uORF@IRES,uORF,MIR	no_diff
chr9:32989757:32990086:-,chr9:32988081:32988122:-,chr9:32987542:32987729:-,chr9:32985969:32986028:-@chr9:33001565:33001626:-,chr9:32989757:32989893:-	0.42	0.35	0.51	0.42	0.34	0.49	0	0.14	(0,0):334,(0,1):26,(1,0):228,(1,1):106	0:274,1:86	(0,0):364,(0,1):23,(1,0):213,(1,1):103	0:254,1:85	chr9	ENST00000379825.2	APTX	AFE	UTR5	IRES,ConservedRegion,uORF@TOP,IRES,uORF,MIR	no_diff
chr9:32989757:32990086:-,chr9:32988081:32988127:-,chr9:32987542:32987729:-,chr9:32985969:32986028:-@chr9:33001514:33001563:-,chr9:32989757:32989893:-	0.54	0.43	0.66	0.54	0.43	0.68	0	0.22	(0,0):350,(0,1):3,(1,0):235,(1,1):106	0:284,1:60	(0,0):379,(0,1):1,(1,0):219,(1,1):103	0:267,1:56	chr9	ENST00000379825.2	APTX	AFE	UTR5	IRES,ConservedRegion,uORF@IRES,uORF,MIR	no_diff
chr9:32989757:32990086:-,chr9:32988081:32988127:-,chr9:32987542:32987729:-,chr9:32985969:32986028:-@chr9:33001565:33001626:-,chr9:32989757:32989893:-	0.43	0.35	0.51	0.42	0.35	0.5	0.01	0.14	(0,0):327,(0,1):26,(1,0):235,(1,1):106	0:280,1:87	(0,0):358,(0,1):23,(1,0):219,(1,1):103	0:251,1:94	chr9	ENST00000379825.2	APTX	AFE	UTR5	IRES,ConservedRegion,uORF@TOP,IRES,uORF,MIR	no_diff
chr9:133710831:133710912:+@chr9:133589268:133589842:+	0.62	0.34	0.83	0.65	0.47	0.8	-0.03	0.43	(0,0):86,(0,1):79,(1,0):3	0:3,1:79	(0,0):172,(0,1):158,(1,0):5	0:5,1:158	chr9	ENST00000372348.2	ABL1	AFE	UTR5	IRES@ConservedRegion,uORF	no_diff
chr9:26892257:26892406:-,chr9:26887311:26887511:-@chr9:26892411:26892725:-	0.49	0.41	0.58	0.52	0.44	0.61	-0.03	0.18	(0,0):87,(0,1):51,(1,0):57	0:57,1:51	(0,0):116,(0,1):63,(1,0):80	0:80,1:63	chr9	ENST00000333916.5	CAAP1	AFE	UTR5	NA@SF2	no_diff
chr9:131873967:131874070:+,chr9:131882792:131882889:+@chr9:131873244:131873311:+,chr9:131873751:131873910:+	0.43	0.35	0.51	0.49	0.41	0.57	-0.06	0.26	(0,0):299,(0,1):88,(1,0):54	0:54,1:88	(0,0):330,(0,1):79,(1,0):61	0:61,1:79	chr9	ENST00000358994.4	PPP2R4	AFE	UTR5	uORF@NA	no_diff
chr7:14024980:14025145:-,chr7:14017052:14017105:-,chr7:13978742:13978871:-,chr7:13975333:13975521:-@chr7:14029188:14029324:-,chr7:14028633:14028764:-	0.61	0.43	0.78	0.62	0.52	0.72	-0.01	0.3	(0,0):38,(0,1):7,(1,0):25	0:25,1:7	(0,0):126,(0,1):22,(1,0):87	0:87,1:22	chr7	ENST00000430479.1	ETV1	AFE	UTR5	NA@ConservedRegion,uORF,UNR-bs	no_diff
chr7:2255520:2255644:-@chr7:2272507:2272583:-,chr7:2270184:2270399:-,chr7:2269619:2269778:-	0.69	0.54	0.82	0.66	0.58	0.74	0.03	0.23	(0,0):217,(0,1):36,(1,0):12	0:12,1:36	(0,0):711,(0,1):168,(1,0):45	0:45,1:168	chr7	ENST00000402746.1	MAD1L1	AFE	UTR5	SF2,ConservedRegion@ConservedRegion,uORF,Ricksha_c	no_diff
chr7:100453063:100454798:+,chr7:100456457:100456564:+,chr7:100457507:100457664:+,chr7:100457772:100458884:+,chr7:100459014:100459206:+@chr7:100450358:100450457:+,chr7:100451778:100452000:+	0.58	0.39	0.75	0.5	0.4	0.6	0.08	0.37	(0,0):75,(0,1):6,(1,0):104	0:104,1:6	(0,0):231,(0,1):26,(1,0):329	0:329,1:26	chr7	ENST00000540482.1	SLC12A9	AFE	UTR5	NA@SF2	no_diff
chr7:100421825:100423148:-,chr7:100421266:100421553:-@chr7:100424601:100425143:-	0.55	0.45	0.66	0.53	0.45	0.6	0.02	0.18	(0,0):71,(0,1):25,(1,0):100	0:100,1:25	(0,0):122,(0,1):51,(1,0):185	0:185,1:51	chr7	ENST00000360620.3	EPHB4	AFE	UTR5	IRES,ConservedRegion,uORF@ConservedRegion,GC_rich,(CCCCG)n	no_diff
chr7:2255520:2255644:-@chr7:2272507:2272583:-,chr7:2270184:2270362:-,chr7:2269619:2269778:-	0.64	0.49	0.77	0.61	0.53	0.69	0.03	0.24	(0,0):211,(0,1):42,(1,0):12	0:12,1:42	(0,0):690,(0,1):189,(1,0):45	0:45,1:189	chr7	ENST00000402746.1	MAD1L1	AFE	UTR5	SF2,ConservedRegion@ConservedRegion,uORF,Ricksha_c	no_diff
chr7:2255520:2255644:-@chr7:2272507:2272583:-,chr7:2270184:2270359:-,chr7:2269619:2269778:-	0.68	0.52	0.81	0.65	0.57	0.72	0.03	0.22	(0,0):218,(0,1):35,(1,0):12	0:12,1:35	(0,0):722,(0,1):157,(1,0):45	0:45,1:157	chr7	ENST00000402746.1	MAD1L1	AFE	UTR5	SF2,ConservedRegion@ConservedRegion,uORF,Ricksha_c	no_diff
chr13:37598477:37599084:-,chr13:37598172:37598330:-@chr13:37633617:37633850:-,chr13:37625625:37625720:-	0.76	0.63	0.88	0.8	0.71	0.89	-0.04	0.23	(0,0):317,(0,1):7,(1,0):67	0:67,1:7	(0,0):1014,(0,1):14,(1,0):157	0:157,1:14	chr13	ENST00000360252.4	FAM48A	AFE	UTR5	NA@NA	no_diff
chr13:37598477:37599084:-,chr13:37598172:37598330:-@chr13:37625625:37625720:-	0.32	0.17	0.51	0.33	0.21	0.49	-0.01	0.27	(0,0):315,(0,1):6,(1,0):67	0:67,1:6	(0,0):1005,(0,1):11,(1,0):157	0:157,1:11	chr13	ENST00000360252.4	FAM48A	AFE	UTR5	NA@NA	no_diff
chr13:37598477:37599084:-,chr13:37598172:37598330:-@chr13:37633332:37633569:-,chr13:37625625:37625720:-	0.75	0.62	0.88	0.82	0.73	0.9	-0.07	0.3	(0,0):315,(0,1):8,(1,0):67	0:67,1:8	(0,0):1015,(0,1):12,(1,0):157	0:157,1:12	chr13	ENST00000360252.4	FAM48A	AFE	UTR5	NA@NA	no_diff
chr1:155657862:155658364:-@chr1:155658450:155658565:-,chr1:155650207:155650247:-	0.86	0.61	0.99	0.78	0.56	0.94	0.08	0.4	(0,0):97,(1,0):21	00:21:00	(0,0):210,(0,1):1,(1,0):36	0:36,1:1	chr1	ENST00000452804.2	MSTO1	AFE	UTR5	IRES,ConservedRegion@ConservedRegion	no_diff
chr1:249151433:249151696:-,chr1:249150713:249150761:-,chr1:249150572:249150621:-,chr1:249149757:249150145:-@chr1:249153117:249153271:-,chr1:249152330:249152520:-	0.8	0.63	0.92	0.74	0.6	0.87	0.06	0.34	(0,0):33,(0,1):2,(1,0):32	0:32,1:2	(0,0):76,(0,1):7,(1,0):54	0:54,1:7	chr1	ENST00000463519.1	ZNF692	AFE	UTR5	SF2,ConservedRegion,uORF@ConservedRegion	no_diff
chr1:221910185:221910802:-,chr1:221879437:221879808:-@chr1:221915323:221915461:-,chr1:221912276:221913129:-	0.29	0.2	0.38	0.32	0.26	0.39	-0.03	0.18	(0,0):15,(0,1):71,(1,0):27	0:27,1:71	(0,0):37,(0,1):131,(1,0):61	0:61,1:131	chr1	ENST00000366899.3	DUSP10	AFE	UTR5	MIRb,ConservedRegion,uORF@ConservedRegion,uORF,IRES,UNR-bs	no_diff
chr1:40319642:40319740:-,chr1:40315791:40315933:-,chr1:40313658:40313769:-@chr1:40348990:40349177:-	0.35	0.24	0.48	0.31	0.24	0.39	0.04	0.21	(0,0):121,(0,1):27,(1,0):35	0:35,1:27	(0,0):302,(0,1):60,(1,0):65	0:65,1:60	chr1	ENST00000046894.5	TRIT1	AFE	UTR5	IRES,ConservedRegion@uORF	no_diff
chr1:247473626:247473758:-@chr1:247495092:247495162:-,chr1:247494734:247494949:-,chr1:247493268:247493383:-,chr1:247492491:247492917:-	0.66	0.51	0.79	0.64	0.44	0.78	0.02	0.28	(0,0):117,(0,1):47,(1,0):8	0:8,1:47	(0,0):167,(0,1):62,(1,0):9	0:9,1:62	chr1	ENST00000462139.1	ZNF496	AFE	UTR5	NA@ConservedRegion,TOP,uORF,IRES	no_diff
chr1:166831440:166832453:-@chr1:166845397:166845479:-	0.12	0.05	0.31	0.21	0.09	0.38	-0.09	0.34	(0,0):164,(0,1):5,(1,0):50	0:50,1:5	(0,0):304,(0,1):5,(1,0):104	0:104,1:5	chr1	ENST00000367874.4	TADA1	AFE	UTR5	PAS@IRES	no_diff
chr1:154144505:154145153:-@chr1:154164378:154164609:-	0.88	0.66	0.98	0.8	0.56	0.98	0.08	0.41	(0,0):3386,(1,0):22	00:22:00	(0,0):4162,(0,1):1,(1,0):26	0:26,1:1	chr1	ENST00000368533.3	TPM3	AFE	UTR5	SF2@ConservedRegion,uORF,UNR-bs	no_diff
chr1:95699711:95699871:+@chr1:95583479:95583647:+,chr1:95609447:95609612:+	0.78	0.65	0.88	0.69	0.59	0.78	0.09	0.42	(0,0):475,(0,1):14,(1,0):18	0:18,1:14	(0,0):1316,(0,1):35,(1,0):28	0:28,1:35	chr1	ENST00000429514.2	RWDD3	AFE	UTR5	IRES@NA	no_diff
chr1:202878138:202878289:-@chr1:202896217:202896371:-,chr1:202894096:202894335:-	0.51	0.37	0.65	0.43	0.32	0.54	0.08	0.35	(0,0):238,(0,1):54,(1,0):14	0:14,1:54	(0,0):469,(0,1):119,(1,0):22	0:22,1:119	chr1	ENST00000367261.3	KLHL12	AFE	UTR5	NA@ConservedRegion	no_diff
chr1:155719081:155719222:+@chr1:155716587:155716662:+,chr1:155716920:155716974:+,chr1:155717060:155717198:+,chr1:155717292:155718322:+,chr1:155718439:155718579:+	0.58	0.43	0.7	0.5	0.37	0.62	0.08	0.33	(0,0):212,(0,1):202,(1,0):14	0:14,1:202	(0,0):323,(0,1):330,(1,0):17	0:17,1:330	chr1	ENST00000538914	ENSG00000203761	AFE	UTR5	NA@SF2	no_diff
chr1:1244466:1244653:+,chr1:1244834:1245194:+,chr1:1245416:1246451:+@chr1:1243994:1244100:+	0.34	0.23	0.49	0.34	0.24	0.47	0	0.23	(0,0):423,(0,1):14,(1,0):299	0:299,1:14	(0,0):417,(0,1):16,(1,0):353	0:353,1:16	chr1	ENST00000379031.5	PUSL1	AFE	UTR5	SF2@IRES	no_diff
chr1:17294698:17295835:+@chr1:17248445:17248573:+	0.67	0.33	0.96	0.63	0.36	0.87	0.04	0.68	(0,0):174,(1,0):26	00:26:00	(0,0):525,(0,1):2,(1,0):72	0:72,1:2	chr1	ENST00000465021.1	CROCC	AFE	UTR5	ConservedRegion@NA	no_diff
chr1:1239466:1241309:-,chr1:1238542:1238661:-@chr1:1243149:1243269:-	0.47	0.19	0.81	0.53	0.25	0.87	-0.06	0.66	(0,0):23,(0,1):1,(1,0):32	0:32,1:1	(0,0):67,(0,1):2,(1,0):61	0:61,1:2	chr1	ENST00000354700.5	ACAP3	AFE	UTR5	NA@ConservedRegion,IRES	no_diff
chr1:147596136:147596350:-,chr1:147588746:147588818:-,chr1:147588076:147588281:-@chr1:147599112:147599459:-,chr1:147597182:147597284:-,chr1:147596136:147596350:-	0.59	0.44	0.73	0.52	0.42	0.62	0.07	0.32	(0,0):117,(0,1):18,(1,0):17,(1,1):15	0:27,1:23	(0,0):480,(0,1):53,(1,0):35,(1,1):33	0:55,1:66	chr1	ENST00000480568.1	NBPF24	AFE	UTR5	SF2@NA	no_diff
chr1:44482066:44482228:-,chr1:44476398:44476554:-,chr1:44475637:44475768:-@chr1:44496978:44497134:-,chr1:44489920:44490034:-	0.7	0.55	0.83	0.71	0.58	0.83	-0.01	0.25	(0,0):37,(0,1):7,(1,0):33	0:33,1:7	(0,0):51,(0,1):11,(1,0):53	0:53,1:11	chr1	ENST00000475075.2	SLC6A9	AFE	UTR5	NA@ConservedRegion,uORF	no_diff
chr2:71221771:71221834:-,chr2:71220826:71220905:-@chr2:71221818:71222001:-	0.73	0.61	0.84	0.68	0.55	0.79	0.05	0.25	(0,0):203,(0,1):16,(1,0):27	0:27,1:16	(0,0):227,(0,1):17,(1,0):24	0:24,1:17	chr2	ENST00000272438.4	TEX261	AFE	UTR5	GC_rich,ConservedRegion@(CGG)n,IRES	no_diff
chr2:85829007:85829792:-,chr2:85828144:85828605:-@chr2:85829730:85829821:-,chr2:85829007:85829187:-	0.23	0.17	0.32	0.27	0.19	0.38	-0.04	0.19	(0,0):65,(0,1):7,(1,0):83,(1,1):64	0:95,1:59	(0,0):39,(0,1):7,(1,0):62,(1,1):37	0:70,1:36	chr2	ENST00000306353.3	TMEM150A	AFE	UTR5	GC_rich,ConservedRegion,uORF@ConservedRegion	no_diff
chr2:192266266:192267444:+,chr2:192272841:192272915:+,chr2:192273770:192273904:+@chr2:192127725:192128114:+,chr2:192141613:192141756:+	0.69	0.47	0.88	0.75	0.68	0.82	-0.06	0.31	(0,0):191,(0,1):3,(1,0):21	0:21,1:3	(0,0):3096,(0,1):30,(1,0):256	0:256,1:30	chr2	ENST00000339514.4	MYO1B	AFE	UTR5	NA@ConservedRegion,uORF,IRES	no_diff
chr2:220094479:220094622:+,chr2:220097212:220097405:+,chr2:220097801:220097913:+@chr2:220094610:220094680:+,chr2:220094950:220095127:+	0.51	0.33	0.67	0.47	0.37	0.58	0.04	0.3	(0,0):37,(0,1):12,(1,0):26	0:26,1:12	(0,0):138,(0,1):34,(1,0):63	0:63,1:34	chr2	ENST00000323348.5	ANKZF1	AFE	UTR5	ConservedRegion@IRES	no_diff
chr2:144969082:144969146:-,chr2:144966170:144966371:-@chr2:145090006:145090029:-,chr2:144993243:144993304:-,chr2:144903139:144903306:-,chr2:144899449:144899622:-	0.62	0.47	0.75	0.65	0.54	0.75	-0.03	0.24	(0,0):58,(0,1):21,(1,0):20	0:20,1:21	(0,0):134,(0,1):32,(1,0):34	0:34,1:32	chr2	ENST00000409214.1	GTDC1	AFE	UTR5	IRES@(GGA)n,uORF	no_diff
chr2:192542862:192542967:+,chr2:192543716:192543854:+,chr2:192546672:192546743:+@chr2:192543258:192543431:+	0.68	0.47	0.86	0.65	0.46	0.83	0.03	0.37	(0,0):22,(0,1):3,(1,0):17	0:17,1:3	(0,0):26,(0,1):7,(1,0):34	0:34,1:7	chr2	ENST00000307849.3	NABP1	AFE	UTR5	IRES,uORF@ConservedRegion	no_diff
chr2:180427126:180427315:-,chr2:180409554:180409696:-@chr2:180725828:180726232:-,chr2:180635248:180635399:-,chr2:180634230:180634529:-	0.23	0.1	0.39	0.18	0.07	0.35	0.05	0.28	(0,0):54,(0,1):38,(1,0):3	0:3,1:38	(0,0):141,(0,1):50,(1,0):3	0:3,1:50	chr2	ENST00000466398.1	ZNF385B	AFE	UTR5	IRES,ConservedRegion,uORF,L2b@ConservedRegion,GC_rich,uORF,G-rich,Tigger16a,(CCG)n	no_diff
chr2:192266266:192267444:+,chr2:192272841:192272915:+,chr2:192273770:192273904:+@chr2:192110254:192110337:+,chr2:192141613:192141756:+	0.48	0.23	0.8	0.49	0.4	0.58	-0.01	0.35	(0,0):192,(0,1):3,(1,0):21	0:21,1:3	(0,0):3108,(0,1):32,(1,0):256	0:256,1:32	chr2	ENST00000339514.4	MYO1B	AFE	UTR5	NA@IRES	no_diff
chr2:86352118:86352205:+,chr2:86352918:86353003:+,chr2:86354284:86354428:+,chr2:86355064:86355114:+,chr2:86357771:86357864:+@chr2:86333338:86333474:+	0.8	0.58	0.98	0.85	0.73	0.93	-0.05	0.32	(0,0):176,(0,1):1,(1,0):49	0:49,1:1	(0,0):774,(0,1):5,(1,0):209	0:209,1:5	chr2	ENST00000254630.7	PTCD3	AFE	UTR5	SF2,ConservedRegion,uORF@NA	no_diff
chr17:27916801:27916880:+,chr17:27934760:27935017:+,chr17:27935213:27935258:+@chr17:27920527:27920753:+	0.69	0.45	0.9	0.69	0.54	0.85	0	0.38	(0,0):111,(0,1):4,(1,0):20	0:20,1:4	(0,0):193,(0,1):8,(1,0):37	0:37,1:8	chr17	ENST00000487527.1	ANKRD13B	AFE	UTR5	NA@ConservedRegion,GC_rich	no_diff
chr17:66287659:66287709:+,chr17:66339745:66339932:+,chr17:66343266:66343313:+,chr17:66347716:66347827:+@chr17:66255323:66255567:+,chr17:66303084:66303852:+	0.42	0.29	0.55	0.46	0.34	0.57	-0.04	0.24	(0,0):88,(0,1):64,(1,0):16	0:16,1:64	(0,0):246,(0,1):70,(1,0):21	0:21,1:70	chr17	ENST00000448504.2	ARSG	AFE	UTR5	NA@ConservedRegion,uORF	no_diff
chr17:77030472:77030615:+,chr17:77040037:77040205:+@chr17:77021745:77022017:+	0.78	0.6	0.93	0.84	0.7	0.95	-0.06	0.29	(0,0):47,(0,1):4,(1,0):19	0:19,1:4	(0,0):43,(0,1):3,(1,0):22	0:22,1:3	chr17	ENST00000579760.1	C1QTNF1	AFE	UTR5	TOP@(CAT)n	no_diff
chr17:77020251:77020576:+,chr17:77042637:77042776:+@chr17:77021745:77022017:+	0.84	0.72	0.95	0.87	0.74	0.95	-0.03	0.23	(0,0):90,(0,1):4,(1,0):54	0:54,1:4	(0,0):104,(0,1):3,(1,0):45	0:45,1:3	chr17	ENST00000581579.1	AC073624.1	AFE	UTR5	ConservedRegion,uORF@(CAT)n	no_diff
chr17:1388988:1389051:-@chr17:1394894:1394972:-,chr17:1387442:1387597:-	0.45	0.02	0.86	0.38	0.06	0.77	0.07	0.75	(0,0):27,(0,1):26	0:0,1:26	(0,0):115,(0,1):108	0:0,1:108	chr17	ENST00000359786.5	MYO1C	AFE	UTR5	NA@ConservedRegion	no_diff
chr17:27250927:27252690:-@chr17:27277913:27278508:-	0.57	0.49	0.65	0.64	0.57	0.7	-0.07	0.27	(0,0):258,(0,1):40,(1,0):172	0:172,1:40	(0,0):452,(0,1):52,(1,0):296	0:296,1:52	chr17	ENST00000332830.4	PHF12	AFE	UTR5	ConservedRegion,PAS,UNR-bs@SF2,ConservedRegion,uORF	no_diff
chr17:45918036:45918539:-@chr17:45918574:45918612:-	0.44	0.02	0.96	0.43	0.03	0.9	0.01	0.79	(0,0):103,(1,0):90	0.0625	(0,0):78,(1,0):86	0.0597222	chr17	ENST00000407215.3	SCRN2	AFE	UTR5	IRES,uORF@NA	no_diff
chr17:81006545:81007030:-,chr17:81006347:81006446:-,chr17:80992911:80992975:-,chr17:80972330:80972395:-,chr17:80963451:80963547:-@chr17:81009613:81009686:-	0.54	0.13	0.94	0.45	0.07	0.92	0.09	0.88	(0,0):69,(1,0):37	00:37:00	(0,0):73,(1,0):47	00:47:00	chr17	ENST00000320865.3	B3GNTL1	AFE	UTR5	AluY,ConservedRegion,uORF@NA	no_diff
chr17:76121807:76121965:-,chr17:76121239:76121344:-@chr17:76128422:76128488:-,chr17:76122858:76122987:-	0.64	0.46	0.79	0.62	0.47	0.76	0.02	0.32	(0,0):75,(0,1):8,(1,0):23	0:23,1:8	(0,0):102,(0,1):13,(1,0):34	0:34,1:13	chr17	ENST00000392467.3	TMC6	AFE	UTR5	ConservedRegion@ConservedRegion,IRES	no_diff
chr17:76124693:76124861:-,chr17:76122605:76122729:-,chr17:76122358:76122447:-,chr17:76121807:76121965:-,chr17:76121239:76121344:-,chr17:76120605:76120862:-@chr17:76128422:76128488:-,chr17:76122858:76122987:-	0.54	0.38	0.72	0.55	0.42	0.68	-0.01	0.34	(0,0):69,(0,1):8,(1,0):61	0:61,1:8	(0,0):65,(0,1):13,(1,0):104	0:104,1:13	chr17	ENST00000322914.3	TMC6	AFE	UTR5	IRES,ConservedRegion@ConservedRegion,IRES	no_diff
chr17:76122858:76123039:-@chr17:76124693:76124861:-,chr17:76122605:76122729:-,chr17:76122358:76122447:-,chr17:76121807:76121965:-,chr17:76121239:76121344:-,chr17:76120605:76120862:-	0.49	0.31	0.65	0.58	0.45	0.69	-0.09	0.37	(0,0):67,(0,1):61,(1,0):8	0:8,1:61	(0,0):59,(0,1):104,(1,0):19	0:19,1:104	chr17	ENST00000392467.3	TMC6	AFE	UTR5	IRES@ConservedRegion,IRES	no_diff
chr17:1012174:1012324:-@chr17:1090094:1090616:-,chr17:1028518:1028702:-	0.7	0.51	0.84	0.69	0.57	0.78	0.01	0.25	(0,0):124,(0,1):23,(1,0):8	0:8,1:23	(0,0):269,(0,1):84,(1,0):24	0:24,1:84	chr17	ENST00000302538.5	ABR	AFE	UTR5	SF2,ConservedRegion@ConservedRegion	no_diff
chr17:77020251:77020576:+,chr17:77040037:77040205:+@chr17:77021745:77022017:+	0.88	0.77	0.96	0.88	0.77	0.97	0	0.16	(0,0):60,(0,1):4,(1,0):68	0:68,1:4	(0,0):64,(0,1):3,(1,0):67	0:67,1:3	chr17	ENST00000581579.1	AC073624.1	AFE	UTR5	ConservedRegion,uORF@(CAT)n	no_diff
chr17:2278786:2279169:+,chr17:2279431:2279555:+@chr17:2240806:2241039:+	0.78	0.67	0.86	0.77	0.69	0.83	0.01	0.16	(0,0):548,(0,1):13,(1,0):130	0:130,1:13	(0,0):1028,(0,1):28,(1,0):250	0:250,1:28	chr17	ENST00000268989.3	SGSM2	AFE	UTR5	SF2@(CGG)n,SF2,ConservedRegion,uORF	no_diff
chr17:49294695:49294777:-,chr17:49286675:49286791:-,chr17:49284249:49284366:-@chr17:49337196:49337427:-,chr17:49336504:49336567:-,chr17:49302369:49302570:-	0.26	0.13	0.42	0.26	0.17	0.35	0	0.23	(0,0):66,(0,1):27,(1,0):5	0:5,1:27	(0,0):264,(0,1):104,(1,0):21	0:21,1:104	chr17	ENST00000591270.1	MBTD1	AFE	UTR5	NA@ConservedRegion,uORF,L3	no_diff
chr17:7579839:7579937:-@chr17:7590695:7590863:-,chr17:7579839:7579940:-	0.29	0.11	0.45	0.27	0.11	0.42	0.02	0.34	(0,0):421,(0,1):387,(1,1):84	0:28,1:443	(0,0):466,(0,1):413,(1,1):81	0:27,1:467	chr17	ENST00000413465.2	TP53	AFE	UTR5	NA@ConservedRegion,uORF,IRES	no_diff
chr10:35415801:35416121:+,chr10:35495823:35495979:+@chr10:35484055:35484142:+	0.79	0.52	0.98	0.72	0.45	0.92	0.07	0.53	(0,0):519,(1,0):74	0.0513889	(0,0):677,(0,1):1,(1,0):104	0:104,1:1	chr10	ENST00000374726.3	CREM	AFE	UTR5	ConservedRegion@NA	no_diff
chr10:75290462:75290593:-,chr10:75289901:75290281:-,chr10:75289438:75289669:-,chr10:75286405:75286538:-,chr10:75283341:75283508:-,chr10:75276133:75277505:-@chr10:75301391:75301496:-	0.54	0.32	0.79	0.45	0.32	0.62	0.09	0.42	(0,0):125,(0,1):3,(1,0):238	0:238,1:3	(0,0):328,(0,1):10,(1,0):575	0:575,1:10	chr10	ENST00000424265.1	USP54	AFE	UTR5	K-BOX,ConservedRegion,uORF@NA	no_diff
chr10:46143742:46143982:-,chr10:46135199:46135411:-,chr10:46121399:46122553:-@chr10:46168127:46168251:-,chr10:46158990:46159290:-	0.48	0.38	0.6	0.56	0.48	0.63	-0.08	0.31	(0,0):60,(0,1):27,(1,0):110	0:110,1:27	(0,0):155,(0,1):51,(1,0):277	0:277,1:51	chr10	ENST00000344646.5	ZFAND4	AFE	UTR5	ConservedRegion@ConservedRegion	no_diff
chr10:35484055:35484142:+@chr10:35416388:35416495:+,chr10:35437296:35437419:+	0.21	0.02	0.47	0.3	0.1	0.56	-0.09	0.52	(0,0):443,(0,1):36	0:0,1:36	(0,0):562,(0,1):44,(1,0):1	0:1,1:44	chr10	ENST00000354759.3	CREM	AFE	UTR5	NA@uORF	no_diff
chr10:134121076:134121477:-@chr10:134145658:134146063:-,chr10:134059404:134059459:-,chr10:134041481:134041632:-	0.17	0.06	0.31	0.24	0.12	0.39	-0.07	0.34	(0,0):338,(0,1):40,(1,0):4	0:4,1:40	(0,0):283,(0,1):34,(1,0):6	0:6,1:34	chr10	ENST00000478542.1	STK32C	AFE	UTR5	NA@ConservedRegion,uORF,IRES,GY-BOX	no_diff
chr10:6002330:6002530:-@chr10:6019740:6020142:-,chr10:6008108:6008302:-	0.79	0.65	0.89	0.7	0.54	0.81	0.09	0.36	(0,0):23,(0,1):14,(1,0):14	0:14,1:14	(0,0):38,(0,1):21,(1,0):13	0:13,1:21	chr10	ENST00000379977.3	IL15RA	AFE	UTR5	ConservedRegion@ConservedRegion,GC_rich	no_diff
chr10:111969989:111970073:+,chr10:111987947:111988079:+@chr10:111985762:111986041:+	0.85	0.74	0.94	0.86	0.78	0.93	-0.01	0.17	(0,0):84,(0,1):6,(1,0):26	0:26,1:6	(0,0):125,(0,1):10,(1,0):47	0:47,1:10	chr10	ENST00000332674.5	MXI1	AFE	UTR5	NA@ConservedRegion,GC_rich,IRES	no_diff
chr10:111985762:111986041:+@chr10:111967363:111967840:+	0.36	0.18	0.57	0.35	0.21	0.49	0.01	0.33	(0,0):50,(0,1):21,(1,0):6	0:6,1:21	(0,0):65,(0,1):36,(1,0):10	0:10,1:36	chr10	ENST00000332674.5	MXI1	AFE	UTR5	GC_rich,IRES,ConservedRegion@ConservedRegion,IRES	no_diff
chr16:2317176:2317604:-,chr16:2314574:2314761:-@chr16:2318056:2318114:-	0.52	0.03	0.95	0.43	0.04	0.89	0.09	0.9	(0,0):1033,(1,0):717	0.497917	(0,0):849,(1,0):550	0.381944	chr16	ENST00000397086.2	RNPS1	AFE	UTR5	SF2,ConservedRegion,uORF@ConservedRegion,uORF	no_diff
chr16:5083703:5084062:+,chr16:5092096:5092968:+,chr16:5122952:5123029:+,chr16:5123154:5123257:+@chr16:5121820:5122058:+	0.36	0.24	0.52	0.31	0.23	0.4	0.05	0.26	(0,0):60,(0,1):12,(1,0):51	0:51,1:12	(0,0):129,(0,1):28,(1,0):98	0:98,1:28	chr16	ENST00000588623.1	ALG1	AFE	UTR5	IRES,L1MC4@NA	no_diff
chr16:74937845:74938244:-@chr16:74949768:74950025:-	0.39	0.26	0.56	0.42	0.32	0.53	-0.03	0.27	(0,0):209,(0,1):15,(1,0):17	0:17,1:15	(0,0):455,(0,1):32,(1,0):41	0:41,1:32	chr16	ENST00000563381.1	WDR59	AFE	UTR5	NA@NA	no_diff
chr16:30205208:30206112:+,chr16:30206207:30206548:+,chr16:30208295:30208422:+,chr16:30208591:30208678:+,chr16:30212046:30212197:+@chr16:29466401:29466445:+,chr16:29469249:29469336:+,chr16:29472703:29472854:+	0.68	0.61	0.75	0.59	0.51	0.67	0.09	0.59	(0,0):66855,(0,1):30,(1,0):476	0:476,1:30	(0,0):79057,(0,1):39,(1,0):403	0:403,1:39	chr16	ENST00000305321.4	BOLA2B	AFE	UTR5	SF2@NA	no_diff
chr16:30212046:30212197:+@chr16:29466401:29466445:+,chr16:29469249:29469336:+,chr16:29472703:29472854:+	0.53	0.38	0.68	0.51	0.38	0.65	0.02	0.3	(0,0):67318,(0,1):30,(1,0):13	0:13,1:30	(0,0):79445,(0,1):39,(1,0):15	0:15,1:39	chr16	ENST00000338971.5	SULT1A3	AFE	UTR5	NA@NA	no_diff
chr16:89785435:89786115:-,chr16:89783138:89783230:-@chr16:89787171:89787394:-	0.77	0.59	0.94	0.7	0.52	0.83	0.07	0.37	(0,0):364,(0,1):3,(1,0):55	0:55,1:3	(0,0):403,(0,1):6,(1,0):73	0:73,1:6	chr16	ENST00000561976.1	C16orf7	AFE	UTR5	ConservedRegion,uORF@NA	no_diff
chr16:711065:711501:+,chr16:711597:711787:+,chr16:711891:712059:+,chr16:712220:712331:+,chr16:712673:712844:+@chr16:699363:699426:+	0.52	0.1	0.96	0.47	0.07	0.94	0.05	0.96	(0,0):118,(1,0):37	00:37:00	(0,0):469,(1,0):138	0.0958333	chr16	ENST00000445361.2	MSLN	AFE	UTR5	ConservedRegion@NA	no_diff
chr16:71487146:71487876:-,chr16:71481513:71483788:-@chr16:71496113:71496273:-,chr16:71490667:71490731:-,chr16:71487945:71488121:-	0.65	0.49	0.79	0.67	0.59	0.76	-0.02	0.22	(0,0):55,(0,1):7,(1,0):122	0:122,1:7	(0,0):224,(0,1):26,(1,0):479	0:479,1:26	chr16	ENST00000564528.1	ZNF23	AFE	UTR5	L1MD,ConservedRegion,uORF,PAS,UNR-bs@ConservedRegion,uORF,IRES,Charlie4z	no_diff
chr16:602301:602771:+@chr16:577856:578029:+,chr16:583946:583998:+,chr16:596817:598287:+	0.35	0.26	0.44	0.34	0.28	0.4	0.01	0.15	(0,0):1069,(0,1):197,(1,0):26	0:26,1:197	(0,0):3029,(0,1):522,(1,0):66	0:66,1:522	chr16	ENST00000219611.2	SOLH	AFE	UTR5	NA@SF2,ConservedRegion,GC_rich	no_diff
chr16:602301:602771:+@chr16:577856:578029:+,chr16:583946:583998:+,chr16:586029:586142:+,chr16:596817:598287:+	0.34	0.25	0.42	0.32	0.27	0.38	0.02	0.14	(0,0):1041,(0,1):225,(1,0):26	0:26,1:225	(0,0):2943,(0,1):608,(1,0):66	0:66,1:608	chr16	ENST00000219611.2	SOLH	AFE	UTR5	NA@SF2,ConservedRegion,GC_rich	no_diff
chr16:30210536:30210648:+,chr16:30212046:30212197:+@chr16:29472703:29472854:+	0.38	0.22	0.59	0.34	0.21	0.49	0.04	0.3	(0,0):66935,(0,1):10,(1,0):14	0:14,1:10	(0,0):79016,(0,1):17,(1,0):20	0:20,1:17	chr16	ENST00000338971.5	SULT1A3	AFE	UTR5	NA@NA	no_diff
chr16:2764066:2765566:-@chr16:2770116:2770552:-	0.42	0.28	0.57	0.48	0.33	0.66	-0.06	0.35	(0,0):34,(0,1):14,(1,0):37	0:37,1:14	(0,0):34,(0,1):10,(1,0):37	0:37,1:10	chr16	ENST00000302641.3	PRSS27	AFE	UTR5	NA@NA	no_diff
chr16:2133222:2133255:+,chr16:2133696:2133817:+@chr16:2097990:2098066:+,chr16:2098588:2098754:+	0.74	0.6	0.86	0.72	0.66	0.79	0.02	0.19	(0,0):787,(0,1):13,(1,0):20	0:20,1:13	(0,0):3830,(0,1):65,(1,0):84	0:84,1:65	chr16	ENST00000382538.6	TSC2	AFE	UTR5	ConservedRegion@SF2,IRES	no_diff
chr16:30212046:30212197:+@chr16:29472703:29472854:+	0.56	0.34	0.78	0.47	0.31	0.65	0.09	0.49	(0,0):66936,(0,1):10,(1,0):13	0:13,1:10	(0,0):79021,(0,1):17,(1,0):15	0:15,1:17	chr16	ENST00000338971.5	SULT1A3	AFE	UTR5	NA@NA	no_diff
chr4:2933282:2933613:-@chr4:2935480:2935769:-,chr4:2935294:2935390:-,chr4:2934833:2934904:-,chr4:2934327:2934417:-	0.53	0.42	0.63	0.52	0.43	0.61	0.01	0.2	(0,0):408,(0,1):48,(1,0):30	0:30,1:48	(0,0):583,(0,1):73,(1,0):44	0:44,1:73	chr4	ENST00000355443.4	MFSD10	AFE	UTR5	ConservedRegion@ConservedRegion	no_diff
chr4:184203760:184204059:+@chr4:184130102:184130178:+,chr4:184174910:184175152:+	0.63	0.5	0.75	0.66	0.6	0.72	-0.03	0.21	(0,0):408,(0,1):19,(1,0):30	0:30,1:19	(0,0):1334,(0,1):74,(1,0):133	0:133,1:74	chr4	ENST00000508747.1	WWC2	AFE	UTR5	uORF@ConservedRegion	no_diff
chr4:184186841:184186921:+@chr4:184180792:184180881:+,chr4:184182063:184182538:+	0.63	0.39	0.84	0.69	0.55	0.8	-0.06	0.39	(0,0):86,(0,1):88,(1,0):3	0:3,1:88	(0,0):295,(0,1):283,(1,0):10	0:10,1:283	chr4	ENST00000427431.1	WWC2	AFE	UTR5	NA@NA	no_diff
chr4:89978269:89978317:-,chr4:89978089:89978139:-@chr4:90032193:90032549:-,chr4:89950611:89950800:-,chr4:89941611:89941820:-,chr4:89930102:89930229:-,chr4:89912124:89912301:-	0.26	0.02	0.54	0.23	0.07	0.51	0.03	0.44	(0,0):52,(0,1):71	0:0,1:71	(0,0):107,(0,1):124	0:0,1:124	chr4	ENST00000511976.1	FAM13A	AFE	UTR5	NA@SF2,ConservedRegion	no_diff
chr4:54248445:54248502:+,chr4:54256688:54256795:+,chr4:54257176:54257306:+@chr4:54243863:54244090:+	0.58	0.42	0.74	0.61	0.53	0.68	-0.03	0.27	(0,0):128,(0,1):13,(1,0):26	0:26,1:13	(0,0):546,(0,1):54,(1,0):120	0:120,1:54	chr4	ENST00000337488.6	FIP1L1	AFE	UTR5	NA@SF2,ConservedRegion,IRES	no_diff
chr4:54294194:54294350:+,chr4:54306749:54306775:+,chr4:54308820:54308874:+,chr4:54310215:54310270:+@chr4:54243863:54244090:+	0.7	0.56	0.81	0.63	0.56	0.7	0.07	0.28	(0,0):280,(0,1):13,(1,0):45	0:45,1:13	(0,0):1321,(0,1):54,(1,0):134	0:134,1:54	chr4	ENST00000337488.6	FIP1L1	AFE	UTR5	NA@SF2,ConservedRegion,IRES	no_diff
chr15:83224620:83225286:-@chr15:83240384:83240573:-,chr15:83240094:83240282:-	0.47	0.3	0.66	0.39	0.25	0.54	0.08	0.4	(0,0):52,(0,1):11,(1,0):17	0:17,1:11	(0,0):82,(0,1):20,(1,0):24	0:24,1:20	chr15	ENST00000450751.2	CPEB1	AFE	UTR5	ConservedRegion,uORF@ConservedRegion,uORF,IRES	no_diff
chr15:83224620:83225286:-@chr15:83240094:83240573:-	0.51	0.35	0.69	0.46	0.31	0.61	0.05	0.33	(0,0):52,(0,1):11,(1,0):17	0:17,1:11	(0,0):82,(0,1):20,(1,0):24	0:24,1:20	chr15	ENST00000450751.2	CPEB1	AFE	UTR5	ConservedRegion,uORF@ConservedRegion,uORF,IRES	no_diff
chr15:42128979:42129138:+,chr15:42129266:42129572:+,chr15:42132223:42132428:+,chr15:42132722:42132858:+,chr15:42132972:42133103:+,chr15:42133253:42133293:+,chr15:42133429:42133471:+,chr15:42133715:42133769:+,chr15:42134017:42134147:+,chr15:42134391:42134474:+,chr15:42135874:42136009:+,chr15:42136669:42136805:+@chr15:42131011:42131120:+	0.73	0.35	1	0.65	0.35	0.92	0.08	0.56	(0,0):48,(1,0):56	00:56:00	(0,0):72,(0,1):1,(1,0):83	0:83,1:1	chr15	ENST00000397299.4	JMJD7	AFE	UTR5	NA@NA	no_diff
chr3:133098561:133100005:+@chr3:132757253:132757279:+,chr3:132764746:132764864:+,chr3:132948114:132948195:+	0.5	0.34	0.7	0.36	0.25	0.53	0.14	0.55	(0,0):20,(0,1):9,(1,0):76	0:76,1:9	(0,0):29,(0,1):14,(1,0):68	0:68,1:14	chr3	ENST00000321871.6	TMEM108	AFE	UTR5	NA	no_diff
chr3:53915693:53915851:-,chr3:53913966:53914099:-,chr3:53912384:53912494:-@chr3:53916006:53916187:-	0.43	0.29	0.59	0.3	0.24	0.36	0.13	0.78	(0,0):38,(0,1):14,(1,0):32	0:32,1:14	(0,0):176,(0,1):77,(1,0):98	0:98,1:77	chr3	ENST00000335754.3	ACTR8	AFE	UTR5	NA	no_diff
chr3:45016750:45016968:+,chr3:45030632:45030733:+,chr3:45031042:45031136:+@chr3:45017741:45017826:+	0.51	0.35	0.7	0.71	0.53	0.89	-0.2	0.95	(0,0):334,(0,1):7,(1,0):189	0:189,1:7	(0,0):319,(0,1):2,(1,0):176	0:176,1:2	chr3	ENST00000296127.3	ZDHHC3	AFE	UTR5	NA	no_diff
chr3:184058258:184060036:+@chr3:184055353:184055506:+	0.6	0.34	0.88	0.72	0.44	0.94	-0.12	0.72	(0,0):83,(0,1):2,(1,0):66	0:66,1:2	(0,0):99,(0,1):1,(1,0):61	0:61,1:1	chr3	ENST00000444495.1	EIF2B5	AFE	UTR5	NA	no_diff
chr12:31255361:31255461:+@chr12:31226794:31226903:+,chr12:31231324:31231471:+	0.39	0.14	0.63	0.58	0.45	0.69	-0.19	0.78	(0,0):811,(0,1):32,(1,0):3	0:3,1:32	(0,0):2349,(0,1):99,(1,0):22	0:22,1:99	chr12	ENST00000542838.1	DDX11	AFE	UTR5	NA	no_diff
chr12:124089904:124090528:+,chr12:124090620:124090706:+,chr12:124093227:124093376:+@chr12:124086672:124086803:+	0.58	0.33	0.82	0.37	0.27	0.47	0.21	0.98	(0,0):162,(0,1):3,(1,0):46	0:46,1:3	(0,0):464,(0,1):20,(1,0):154	0:154,1:20	chr12	ENST00000542286.1	DDX55	AFE	UTR5	NA	no_diff
chr12:124103144:124103384:+@chr12:124086672:124086803:+	0.79	0.62	0.93	0.65	0.55	0.75	0.14	0.76	(0,0):461,(0,1):3,(1,0):42	0:42,1:3	(0,0):1204,(0,1):20,(1,0):110	0:110,1:20	chr12	ENST00000542286.1	DDX55	AFE	UTR5	NA	no_diff
chr12:123459354:123459668:+,chr12:123460358:123460414:+,chr12:123461148:123461314:+,chr12:123461418:123461517:+,chr12:123462528:123462746:+,chr12:123462907:123463116:+@chr12:123459778:123459930:+	0.62	0.47	0.79	0.52	0.37	0.68	0.1	0.47	(0,0):140,(0,1):9,(1,0):180	0:180,1:9	(0,0):175,(0,1):13,(1,0):159	0:159,1:13	chr12	ENST00000542678.1	ABCB9	AFE	UTR5	NA	no_diff
chr12:123459354:123459668:+,chr12:123460358:123460414:+,chr12:123461201:123461314:+,chr12:123461418:123461517:+,chr12:123462907:123463116:+@chr12:123459778:123459930:+	0.71	0.58	0.85	0.59	0.46	0.72	0.12	0.52	(0,0):114,(0,1):9,(1,0):206	0:206,1:9	(0,0):159,(0,1):13,(1,0):175	0:175,1:13	chr12	ENST00000542678.1	ABCB9	AFE	UTR5	NA	no_diff
chr12:123459354:123459668:+,chr12:123460358:123460414:+,chr12:123461201:123461314:+,chr12:123461418:123461713:+,chr12:123462872:123463116:+@chr12:123459778:123459930:+	0.64	0.5	0.79	0.54	0.41	0.69	0.1	0.38	(0,0):123,(0,1):9,(1,0):197	0:197,1:9	(0,0):155,(0,1):13,(1,0):179	0:179,1:13	chr12	ENST00000542678.1	ABCB9	AFE	UTR5	NA	no_diff
chr12:123459354:123459668:+,chr12:123460358:123460414:+,chr12:123461201:123461314:+,chr12:123461418:123461517:+,chr12:123462528:123462638:+,chr12:123462907:123463116:+@chr12:123459778:123459930:+	0.67	0.52	0.81	0.56	0.43	0.69	0.11	0.46	(0,0):121,(0,1):9,(1,0):199	0:199,1:9	(0,0):164,(0,1):13,(1,0):170	0:170,1:13	chr12	ENST00000542678.1	ABCB9	AFE	UTR5	NA	no_diff
chr12:31632523:31633189:-@chr12:31648744:31648853:-	0.53	0.32	0.76	0.42	0.32	0.54	0.11	0.44	(0,0):21,(0,1):4,(1,0):65	0:65,1:4	(0,0):93,(0,1):19,(1,0):223	0:223,1:19	chr12	ENST00000536562.1	DENND5B	AFE	UTR5	NA	no_diff
chr12:31255361:31255461:+@chr12:31226779:31227025:+,chr12:31231324:31231471:+,chr12:31236747:31236995:+,chr12:31237517:31237603:+,chr12:31237903:31238060:+,chr12:31240872:31240917:+,chr12:31241978:31242085:+,chr12:31242337:31243028:+	0.37	0.13	0.61	0.58	0.47	0.67	-0.21	0.95	(0,0):530,(0,1):313,(1,0):3	0:3,1:313	(0,0):1502,(0,1):946,(1,0):22	0:22,1:946	chr12	ENST00000542838.1	DDX11	AFE	UTR5	NA	no_diff
chr12:124090928:124093376:+@chr12:124086672:124086803:+	0.37	0.17	0.64	0.18	0.12	0.26	0.19	0.89	(0,0):146,(0,1):3,(1,0):62	0:62,1:3	(0,0):452,(0,1):20,(1,0):166	0:166,1:20	chr12	ENST00000542286.1	DDX55	AFE	UTR5	NA	no_diff
chr12:123459354:123459668:+,chr12:123460358:123460414:+,chr12:123461148:123461314:+,chr12:123461418:123461510:+,chr12:123462872:123463116:+@chr12:123459778:123459930:+	0.65	0.5	0.8	0.54	0.42	0.67	0.11	0.45	(0,0):147,(0,1):9,(1,0):173	0:173,1:9	(0,0):180,(0,1):13,(1,0):154	0:154,1:13	chr12	ENST00000542678.1	ABCB9	AFE	UTR5	NA	no_diff
chr5:177030861:177031542:+@chr5:177027172:177027261:+	0.8	0.59	0.95	0.63	0.39	0.89	0.17	0.77	(0,0):139,(0,1):1,(1,0):206	0:206,1:1	(0,0):139,(0,1):3,(1,0):182	0:182,1:3	chr5	ENST00000029410.5	B4GALT7	AFE	UTR5	NA	no_diff
chr5:138378309:138378408:-@chr5:138533958:138534065:-,chr5:138532130:138532217:-,chr5:138463428:138463542:-	0.8	0.65	0.89	0.66	0.49	0.78	0.14	0.75	(0,0):147,(0,1):22,(1,0):11	0:11,1:22	(0,0):290,(0,1):58,(1,0):13	0:13,1:58	chr5	ENST00000394817.2	SIL1	AFE	UTR5	NA	no_diff
chr5:133477155:133477995:+@chr5:133451427:133451724:+	0.17	0.11	0.24	0.29	0.2	0.4	-0.12	0.98	(0,0):307,(0,1):38,(1,0):24	0:24,1:38	(0,0):477,(0,1):27,(1,0):35	0:35,1:27	chr5	ENST00000342854.5	TCF7	AFE	UTR5	NA	no_diff
chr18:45691502:45691937:-,chr18:45614041:45614169:-,chr18:45566271:45567494:-@chr18:45901909:45901935:-,chr18:45864545:45864769:-,chr18:45712305:45712366:-,chr18:45691502:45691624:-	0.81	0.63	0.93	0.7	0.57	0.81	0.11	0.48	(0,0):20,(0,1):2,(1,0):59	0:59,1:2	(0,0):34,(0,1):9,(1,0):106,(1,1):1	0:107,1:9	chr18	ENST00000588982.1	ZBTB7C	AFE	UTR5	NA	no_diff
chr18:45691502:45691937:-,chr18:45614041:45614169:-,chr18:45566271:45567494:-@chr18:45935597:45935663:-,chr18:45864545:45864769:-,chr18:45712305:45712366:-,chr18:45691502:45691628:-	0.84	0.68	0.94	0.69	0.56	0.81	0.15	0.87	(0,0):20,(0,1):2,(1,0):59	0:59,1:2	(0,0):39,(0,1):11,(1,0):106,(1,1):1	0:107,1:11	chr18	ENST00000588982.1	ZBTB7C	AFE	UTR5	NA	no_diff
chr18:67727086:67727278:-,chr18:67724978:67725068:-,chr18:67721367:67721520:-,chr18:67720531:67720750:-,chr18:67718647:67718784:-@chr18:67872864:67872962:-	0.59	0.18	0.91	0.81	0.59	0.97	-0.22	0.67	(0,0):276,(0,1):1,(1,0):28	0:28,1:1	(0,0):1724,(0,1):1,(1,0):178	0:178,1:1	chr18	ENST00000583043.1	RTTN	AFE	UTR5	NA	no_diff
chr18:3449973:3450068:+,chr18:3450320:3450503:+@chr18:3447608:3447795:+	0.77	0.67	0.86	0.66	0.56	0.76	0.11	0.56	(0,0):226,(0,1):12,(1,0):76	0:76,1:12	(0,0):284,(0,1):22,(1,0):79	0:79,1:22	chr18	ENST00000548489.1	TGIF1	AFE	UTR5	NA	no_diff
chr18:3455412:3456578:+@chr18:3447608:3447795:+	0.59	0.47	0.72	0.49	0.39	0.62	0.1	0.43	(0,0):400,(0,1):12,(1,0):177	0:177,1:12	(0,0):501,(0,1):22,(1,0):200	0:200,1:22	chr18	ENST00000548489.1	TGIF1	AFE	UTR5	NA	no_diff
chr22:19131570:19132146:-,chr22:19130239:19130407:-@chr22:19132019:19132190:-	0.74	0.58	0.88	0.59	0.47	0.73	0.15	0.74	(0,0):128,(0,1):4,(1,0):146,(1,1):13	0:155,1:8	(0,0):150,(0,1):9,(1,0):160,(1,1):20	0:174,1:15	chr22	ENST00000252137.6	DGCR14	AFE	UTR5	NA	no_diff
chr21:43321731:43321858:-,chr21:43319162:43319456:-@chr21:43338965:43339142:-	0.43	0.23	0.64	0.59	0.45	0.76	-0.16	0.64	(0,0):132,(0,1):8,(1,0):19	0:19,1:8	(0,0):290,(0,1):10,(1,0):48	0:48,1:10	chr21	ENST00000449165.1	C2CD2	AFE	UTR5	NA	no_diff
chr21:43327769:43328352:-,chr21:43327101:43327275:-@chr21:43338965:43339142:-	0.25	0.12	0.43	0.38	0.23	0.56	-0.13	0.53	(0,0):89,(0,1):8,(1,0):15	0:15,1:8	(0,0):168,(0,1):10,(1,0):38	0:38,1:10	chr21	ENST00000329623.7	C2CD2	AFE	UTR5	NA	no_diff
chr11:721064:721206:+,chr11:721285:721352:+,chr11:721565:721691:+,chr11:722091:722165:+,chr11:722401:722549:+@chr11:706123:706288:+,chr11:709330:709451:+	0.75	0.57	0.89	0.89	0.8	0.95	-0.14	0.7	(0,0):91,(0,1):5,(1,0):37	0:37,1:5	(0,0):270,(0,1):5,(1,0):101	0:101,1:5	chr11	ENST00000318562.8	EPS8L2	AFE	UTR5	NA	no_diff
chr11:128628010:128628221:+@chr11:128563989:128564171:+	0.69	0.53	0.84	0.8	0.66	0.92	-0.11	0.46	(0,0):28,(0,1):8,(1,0):25	0:25,1:8	(0,0):65,(0,1):6,(1,0):35	0:35,1:6	chr11	ENST00000525560.1	FLI1	AFE	UTR5	NA	no_diff
chr11:126277129:126277244:+,chr11:126277469:126277529:+,chr11:126277994:126278089:+,chr11:126278202:126278391:+@chr11:126275982:126276066:+	0.82	0.5	0.97	0.7	0.38	0.96	0.12	0.6	(0,0):78,(1,0):83	0.0576389	(0,0):77,(0,1):1,(1,0):113	0:113,1:1	chr11	ENST00000530591.1	ST3GAL4	AFE	UTR5	NA	no_diff
chr11:126276704:126276918:+,chr11:126277147:126277244:+,chr11:126277469:126277529:+,chr11:126277994:126278089:+,chr11:126278202:126278391:+@chr11:126275982:126276066:+	0.81	0.47	0.99	0.67	0.42	0.91	0.14	0.67	(0,0):63,(1,0):98	0.0680556	(0,0):55,(0,1):1,(1,0):135	0:135,1:1	chr11	ENST00000530591.1	ST3GAL4	AFE	UTR5	NA	no_diff
chr11:45991366:45992918:-,chr11:45986866:45987159:-@chr11:46142486:46142985:-,chr11:46113734:46113774:-,chr11:46112006:46112117:-,chr11:46105717:46105853:-	0.43	0.32	0.56	0.54	0.46	0.61	-0.11	0.47	(0,0):57,(0,1):23,(1,0):43	0:43,1:23	(0,0):216,(0,1):54,(1,0):153	0:153,1:54	chr11	ENST00000323180.6	PHF21A	AFE	UTR5	NA	no_diff
chr19:30205814:30205963:-@chr19:30206032:30206452:-,chr19:30199161:30199330:-	0.26	0.06	0.47	0.42	0.27	0.59	-0.16	0.68	(0,0):125,(0,1):63,(1,0):3	0:3,1:63	(0,0):251,(0,1):72,(1,0):8	0:8,1:72	chr19	ENST00000323670.9	C19orf12	AFE	UTR5	NA	no_diff
chr19:2809526:2810488:+@chr19:2785506:2785676:+	0.68	0.51	0.84	0.8	0.68	0.9	-0.12	0.45	(0,0):2011,(0,1):6,(1,0):120	0:120,1:6	(0,0):3644,(0,1):7,(1,0):269	0:269,1:7	chr19	ENST00000307741.6	THOP1	AFE	UTR5	NA	no_diff
chr19:10746480:10747261:+@chr19:10713133:10713237:+	0.85	0.47	0.99	0.7	0.43	0.97	0.15	0.58	(0,0):428,(1,0):54	00:54:00	(0,0):596,(0,1):1,(1,0):66	0:66,1:1	chr19	ENST00000407327.4	SLC44A2	AFE	UTR5	NA	no_diff
chr19:21116830:21116956:+@chr19:21106080:21106209:+	0.5	0.3	0.68	0.64	0.46	0.8	-0.14	0.55	(0,0):33,(0,1):12,(1,0):11	0:11,1:12	(0,0):48,(0,1):10,(1,0):18	0:18,1:10	chr19	ENST00000328178.7	ZNF85	AFE	UTR5	NA	no_diff
chr19:56135813:56135932:-,chr19:56132107:56134010:-@chr19:56135850:56135941:-	0.62	0.35	0.9	0.84	0.52	0.99	-0.22	0.93	(0,0):20,(0,1):2,(1,0):339	0:339,1:2	(0,0):23,(1,0):301,(1,1):1	0:301,1:1	chr19	ENST00000325351.3	ZNF784	AFE	UTR5	NA	no_diff
chr14:75746346:75746831:+@chr14:75745531:75745826:+	0.28	0.15	0.43	0.16	0.08	0.29	0.12	0.56	(0,0):11,(0,1):18,(1,0):12	0:12,1:18	(0,0):34,(0,1):25,(1,0):8	0:8,1:25	chr14	ENST00000303562.4	FOS	AFE	UTR5	NA	no_diff
chr14:72052998:72053645:+,chr14:72054288:72056087:+@chr14:71933902:71933964:+,chr14:71979460:71979562:+,chr14:71996029:71996087:+	0.55	0.39	0.71	0.68	0.57	0.78	-0.13	0.59	(0,0):26,(0,1):9,(1,0):163	0:163,1:9	(0,0):73,(0,1):16,(1,0):526	0:526,1:16	chr14	ENST00000381232.3	SIPA1L1	AFE	UTR5	NA	no_diff
chr14:72054288:72056087:+@chr14:71933902:71933964:+,chr14:71979460:71979562:+,chr14:71996029:71996087:+	0.61	0.47	0.76	0.74	0.65	0.82	-0.13	0.62	(0,0):26,(0,1):9,(1,0):163	0:163,1:9	(0,0):73,(0,1):16,(1,0):526	0:526,1:16	chr14	ENST00000381232.3	SIPA1L1	AFE	UTR5	NA	no_diff
chr6:105232860:105235289:-@chr6:105307442:105307794:-	0.69	0.41	0.91	0.84	0.69	0.94	-0.15	0.55	(0,0):132,(0,1):2,(1,0):40	0:40,1:2	(0,0):513,(0,1):3,(1,0):162	0:162,1:3	chr6	ENST00000262903.4	HACE1	AFE	UTR5	NA	no_diff
chr6:128718711:128718833:-@chr6:128841404:128841723:-	0.63	0.48	0.75	0.77	0.7	0.83	-0.14	0.9	(0,0):61,(0,1):38,(1,0):13	0:13,1:38	(0,0):123,(0,1):76,(1,0):52	0:52,1:76	chr6	ENST00000368226.4	PTPRK	AFE	UTR5	NA	no_diff
chr6:30887535:30887625:+@chr6:30882103:30882121:+,chr6:30882582:30882814:+	0.46	0.25	0.66	0.63	0.5	0.74	-0.17	0.72	(0,0):497,(0,1):42,(1,0):4	0:4,1:42	(0,0):1042,(0,1):93,(1,0):16	0:16,1:93	chr6	ENST00000321897.5	VARS2	AFE	UTR5	NA	no_diff
chrX:135251455:135252139:+,chrX:135288566:135288747:+@chrX:135279222:135279293:+	0.52	0.02	0.95	0.69	0.32	0.97	-0.17	0.81	(0,0):701,(1,0):1049	0.728472	(0,0):822,(1,0):1112	0.772222	chrX	ENST00000370690.3	FHL1	AFE	UTR5	NA	no_diff
chr8:95908040:95908155:+,chr8:95970223:95970407:+,chr8:95993083:95993201:+,chr8:96044223:96044326:+@chr8:96037221:96037433:+	0.82	0.58	0.98	0.68	0.46	0.87	0.14	0.59	(0,0):608,(0,1):1,(1,0):27	0:27,1:1	(0,0):1259,(0,1):4,(1,0):32	0:32,1:4	chr8	ENST00000523378.1	NDUFAF6	AFE	UTR5	NA	no_diff
chr8:144766622:144766712:+,chr8:144773243:144774500:+@chr8:144766622:144766712:+,chr8:144769087:144769184:+,chr8:144770164:144770237:+,chr8:144770832:144771471:+,chr8:144772227:144772293:+	0.74	0.56	0.87	0.6	0.45	0.73	0.14	0.63	(0,0):63,(0,1):5,(1,0):21	0:21,1:5	(0,0):109,(0,1):16,(1,0):34	0:34,1:16	chr8	ENST00000533031.1	ZNF707	AFE	UTR5	NA	no_diff
chr8:145687666:145688245:-@chr8:145690736:145690849:-,chr8:145690192:145690479:-	0.16	0.09	0.24	0.27	0.17	0.4	-0.11	0.61	(0,0):243,(0,1):43,(1,0):12	0:12,1:43	(0,0):207,(0,1):27,(1,0):15	0:15,1:27	chr8	ENST00000438911.2	CYHR1	AFE	UTR5	NA	no_diff
chr8:145687666:145688245:-@chr8:145690192:145690871:-	0.25	0.14	0.38	0.37	0.25	0.51	-0.12	0.55	(0,0):242,(0,1):44,(1,0):12	0:12,1:44	(0,0):202,(0,1):32,(1,0):15	0:15,1:32	chr8	ENST00000438911.2	CYHR1	AFE	UTR5	NA	no_diff
chr8:145687666:145688245:-@chr8:145690954:145691031:-,chr8:145690192:145690479:-	0.15	0.08	0.23	0.27	0.17	0.39	-0.12	0.71	(0,0):244,(0,1):43,(1,0):12	0:12,1:43	(0,0):211,(0,1):26,(1,0):15	0:15,1:26	chr8	ENST00000438911.2	CYHR1	AFE	UTR5	NA	no_diff
chr20:30457613:30457801:-,chr20:30457367:30457400:-,chr20:30454874:30454956:-,chr20:30452756:30452805:-,chr20:30451710:30451784:-,chr20:30450374:30450545:-@chr20:30458379:30458467:-	0.76	0.39	0.99	0.65	0.3	0.93	0.11	0.7	(0,0):18,(1,0):58	00:58:00	(0,0):24,(1,0):36	00:36:00	chr20	ENST00000278979.3	DUSP15	AFE	UTR5	NA	no_diff
chr20:35787295:35787439:-@chr20:35807626:35807974:-	0.13	0.02	0.31	0.31	0.1	0.51	-0.18	0.74	(0,0):180,(0,1):31	0:0,1:31	(0,0):436,(0,1):44,(1,0):5	0:5,1:44	chr20	ENST00000343811.4	C20orf132	AFE	UTR5	NA	no_diff
chr20:45014763:45014914:-@chr20:45035187:45035271:-,chr20:45023044:45023142:-	0.72	0.6	0.83	0.6	0.51	0.69	0.12	0.59	(0,0):258,(0,1):15,(1,0):29	0:29,1:15	(0,0):660,(0,1):42,(1,0):47	0:47,1:42	chr20	ENST00000290246.6	ELMO2	AFE	UTR5	NA	no_diff
chr9:124530711:124530912:+@chr9:124505064:124505200:+,chr9:124519292:124519445:+	0.78	0.66	0.88	0.65	0.56	0.74	0.13	0.89	(0,0):390,(0,1):14,(1,0):31	0:31,1:14	(0,0):844,(0,1):42,(1,0):47	0:47,1:42	chr9	ENST00000373782.3	DAB2IP	AFE	UTR5	NA	no_diff
chr9:117386630:117386739:+,chr9:117389176:117389286:+@chr9:117373706:117373844:+,chr9:117379398:117379581:+	0.71	0.56	0.83	0.82	0.71	0.9	-0.11	0.43	(0,0):95,(0,1):15,(1,0):22	0:22,1:15	(0,0):146,(0,1):12,(1,0):34	0:34,1:12	chr9	ENST00000288502.4	C9orf91	AFE	UTR5	NA	no_diff
chr9:139313496:139313558:+@chr9:139305116:139305191:+,chr9:139306449:139306651:+,chr9:139306942:139307021:+	0.64	0.06	0.97	0.45	0.03	0.96	0.19	0.72	(0,0):1089,(0,1):290	0:0,1:290	(0,0):2791,(0,1):706	0:0,1:706	chr9	ENST00000371717.3	PMPCA	AFE	UTR5	NA	no_diff
chr9:119249638:119249816:-,chr9:119204732:119204832:-,chr9:119202888:119203071:-@chr9:119449345:119449513:-,chr9:119413807:119414072:-	0.47	0.34	0.6	0.59	0.49	0.68	-0.12	0.48	(0,0):31,(0,1):29,(1,0):28	0:28,1:29	(0,0):69,(0,1):36,(1,0):55	0:55,1:36	chr9	ENST00000373986.3	ASTN2	AFE	UTR5	NA	no_diff
chr9:136654380:136655349:-,chr9:136653476:136653608:-@chr9:136857197:136857405:-	0.54	0.33	0.75	0.37	0.27	0.49	0.17	0.83	(0,0):240,(0,1):6,(1,0):50	0:50,1:6	(0,0):527,(0,1):18,(1,0):77	0:77,1:18	chr9	ENST00000371850.3	VAV2	AFE	UTR5	NA	no_diff
chr9:131393524:131394602:+@chr9:131392581:131392654:+	0.45	0.07	0.86	0.67	0.11	0.97	-0.22	0.96	(0,0):61,(1,0):43	00:43:00	(0,0):237,(1,0):122	0.0847222	chr9	ENST00000372731.4	SPTAN1	AFE	UTR5	NA	no_diff
chr7:889157:889240:+@chr7:856252:856310:+,chr7:878435:878623:+	0.33	0.11	0.57	0.5	0.36	0.63	-0.17	0.67	(0,0):312,(0,1):76,(1,0):2	0:2,1:76	(0,0):1072,(0,1):199,(1,0):12	0:12,1:199	chr7	ENST00000389574.3	SUN1	AFE	UTR5	NA	no_diff
chr7:76057955:76058950:+@chr7:76026841:76027114:+,chr7:76054369:76054593:+	0.08	0.02	0.16	0.22	0.1	0.36	-0.14	0.88	(0,0):30,(0,1):26,(1,0):4	0:4,1:26	(0,0):19,(0,1):14,(1,0):8	0:8,1:14	chr7	ENST00000336517.4	ZP3	AFE	UTR5	NA	no_diff
chr7:100454416:100456564:+,chr7:100456672:100456783:+,chr7:100457507:100457664:+,chr7:100457772:100458884:+,chr7:100459014:100459206:+@chr7:100450359:100450461:+,chr7:100451778:100452000:+	0.53	0.38	0.73	0.41	0.33	0.5	0.12	0.45	(0,0):86,(0,1):6,(1,0):93	0:93,1:6	(0,0):228,(0,1):33,(1,0):325	0:325,1:33	chr7	ENST00000540482.1	SLC12A9	AFE	UTR5	NA	no_diff
chr7:98988495:98988722:+@chr7:98983325:98983401:+	0.4	0.22	0.62	0.53	0.3	0.75	-0.13	0.56	(0,0):770,(0,1):5,(1,0):136	0:136,1:5	(0,0):1067,(0,1):3,(1,0):181	0:181,1:3	chr7	ENST00000252725.5	ARPC1B	AFE	UTR5	NA	no_diff
chr7:882978:883157:+@chr7:856252:856310:+,chr7:872142:872238:+	0.51	0.36	0.67	0.36	0.28	0.44	0.15	0.86	(0,0):281,(0,1):17,(1,0):22	0:22,1:17	(0,0):847,(0,1):70,(1,0):49	0:49,1:70	chr7	ENST00000389574.3	SUN1	AFE	UTR5	NA	no_diff
chr7:100453063:100454798:+,chr7:100456457:100456564:+@chr7:100450358:100450457:+,chr7:100451778:100452000:+	0.59	0.41	0.76	0.47	0.37	0.58	0.12	0.47	(0,0):44,(0,1):6,(1,0):62	0:62,1:6	(0,0):159,(0,1):26,(1,0):160	0:160,1:26	chr7	ENST00000540482.1	SLC12A9	AFE	UTR5	NA	no_diff
chr7:100453063:100454798:+,chr7:100456457:100456564:+,chr7:100457507:100457664:+,chr7:100457772:100458884:+,chr7:100459014:100459206:+@chr7:100450359:100450461:+,chr7:100451778:100452000:+	0.58	0.41	0.77	0.44	0.35	0.53	0.14	0.66	(0,0):75,(0,1):6,(1,0):104	0:104,1:6	(0,0):224,(0,1):33,(1,0):329	0:329,1:33	chr7	ENST00000540482.1	SLC12A9	AFE	UTR5	NA	no_diff
chr7:100454416:100456564:+@chr7:100450358:100450457:+,chr7:100451778:100452000:+	0.48	0.27	0.7	0.34	0.26	0.44	0.14	0.5	(0,0):67,(0,1):6,(1,0):39	0:39,1:6	(0,0):211,(0,1):26,(1,0):108	0:108,1:26	chr7	ENST00000540482.1	SLC12A9	AFE	UTR5	NA	no_diff
chr7:100454416:100456564:+@chr7:100450359:100450461:+,chr7:100451778:100452000:+	0.47	0.3	0.68	0.29	0.22	0.38	0.18	0.93	(0,0):67,(0,1):6,(1,0):39	0:39,1:6	(0,0):204,(0,1):33,(1,0):108	0:108,1:33	chr7	ENST00000540482.1	SLC12A9	AFE	UTR5	NA	no_diff
chr13:37596148:37597106:-@chr13:37633617:37633850:-,chr13:37625625:37625720:-	0.56	0.37	0.8	0.69	0.58	0.79	-0.13	0.59	(0,0):401,(0,1):7,(1,0):30	0:30,1:7	(0,0):1234,(0,1):14,(1,0):111	0:111,1:14	chr13	ENST00000360252.4	FAM48A	AFE	UTR5	NA	no_diff
chr1:220310144:220310253:+@chr1:220267455:220267825:+	0.66	0.42	0.85	0.76	0.69	0.82	-0.1	0.36	(0,0):350,(0,1):18,(1,0):5	0:5,1:18	(0,0):1993,(0,1):109,(1,0):42	0:42,1:109	chr1	ENST00000366922.1	IARS2	AFE	UTR5	NA	no_diff
chr1:110031469:110032750:+@chr1:110026561:110026702:+	0.75	0.45	0.96	0.61	0.35	0.87	0.14	0.63	(0,0):95,(1,0):37	00:37:00	(0,0):160,(0,1):2,(1,0):56	0:56,1:2	chr1	ENST00000369870.3	ATXN7L2	AFE	UTR5	NA	no_diff
chr1:47080643:47080805:-@chr1:47082383:47082563:-,chr1:47078576:47079043:-	0.18	0.04	0.42	0.34	0.08	0.62	-0.16	0.65	(0,0):10,(0,1):32	0:0,1:32	(0,0):16,(0,1):26,(1,0):2	0:2,1:26	chr1	ENST00000545730.1	MKNK1	AFE	UTR5	NA	no_diff
chr1:67390642:67390778:+,chr1:67391825:67391925:+,chr1:67394612:67394646:+,chr1:67405711:67405735:+,chr1:67411833:67411978:+@chr1:67395926:67396083:+	0.56	0.38	0.76	0.74	0.6	0.86	-0.18	0.91	(0,0):47,(0,1):6,(1,0):32	0:32,1:6	(0,0):121,(0,1):9,(1,0):114	0:114,1:9	chr1	ENST00000371018.3	MIER1	AFE	UTR5	NA	no_diff
chr1:155721558:155721691:-@chr1:155826938:155827008:-,chr1:155823067:155823597:-,chr1:155796628:155796819:-,chr1:155792077:155792267:-,chr1:155791265:155791339:-,chr1:155790397:155790447:-,chr1:155785596:155786053:-,chr1:155784121:155784240:-	0.27	0.06	0.53	0.39	0.24	0.53	-0.12	0.57	(0,0):529,(0,1):97,(1,0):1	0:1,1:97	(0,0):2266,(0,1):411,(1,0):10	0:10,1:411	chr1	ENST00000473267.1	GON4L	AFE	UTR5	NA	no_diff
chr1:33815198:33815499:-,chr1:33799691:33799893:-@chr1:33840967:33841194:-	0.79	0.69	0.88	0.89	0.81	0.96	-0.1	0.55	(0,0):252,(0,1):14,(1,0):148	0:148,1:14	(0,0):414,(0,1):6,(1,0):148	0:148,1:6	chr1	ENST00000373422.3	PHC2	AFE	UTR5	NA	no_diff
chr1:67391825:67391925:+,chr1:67405711:67405735:+,chr1:67423742:67423903:+@chr1:67395926:67396083:+	0.69	0.51	0.84	0.79	0.68	0.89	-0.1	0.45	(0,0):78,(0,1):6,(1,0):38	0:38,1:6	(0,0):259,(0,1):9,(1,0):97	0:97,1:9	chr1	ENST00000371018.3	MIER1	AFE	UTR5	NA	no_diff
chr1:109824241:109825041:-@chr1:109825683:109825771:-,chr1:109825302:109825353:-	0.75	0.61	0.86	0.89	0.77	0.96	-0.14	0.79	(0,0):271,(0,1):8,(1,0):258	0:258,1:8	(0,0):264,(0,1):2,(1,0):237	0:237,1:2	chr1	ENST00000369904.3	PSRC1	AFE	UTR5	NA	no_diff
chr1:249151433:249151696:-,chr1:249150713:249150761:-,chr1:249150572:249150621:-,chr1:249149757:249150145:-@chr1:249153214:249153284:-,chr1:249152330:249152520:-	0.84	0.64	0.97	0.72	0.56	0.88	0.12	0.53	(0,0):34,(0,1):1,(1,0):32	0:32,1:1	(0,0):77,(0,1):6,(1,0):54	0:54,1:6	chr1	ENST00000463519.1	ZNF692	AFE	UTR5	NA	no_diff
chr2:25705665:25705742:-@chr2:25896255:25896503:-,chr2:25875463:25875530:-,chr2:25861883:25861963:-	0.4	0.08	0.74	0.27	0.02	0.71	0.13	0.76	(0,0):440,(0,1):57	0:0,1:57	(0,0):652,(0,1):83	0:0,1:83	chr2	ENST00000496972.2	DTNB	AFE	UTR5	NA	no_diff
chr2:25705665:25705742:-@chr2:25896255:25896503:-,chr2:25875463:25875530:-,chr2:25861883:25861963:-,chr2:25851040:25851253:-,chr2:25830105:25830190:-,chr2:25803590:25803695:-	0.34	0.03	0.7	0.18	0.01	0.55	0.16	0.74	(0,0):301,(0,1):196	0:0,1:196	(0,0):466,(0,1):269	0:0,1:269	chr2	ENST00000496972.2	DTNB	AFE	UTR5	NA	no_diff
chr2:102460563:102460773:+,chr2:102472439:102472600:+,chr2:102475458:102475544:+@chr2:102407182:102407238:+	0.47	0.13	0.9	0.59	0.11	0.98	-0.12	0.82	(0,0):501,(1,0):194	0.134722	(0,0):2045,(1,0):714	0.495833	chr2	ENST00000347699.4	MAP4K4	AFE	UTR5	NA	no_diff
chr2:73208138:73208363:-,chr2:73198699:73198814:-@chr2:73286137:73286309:-,chr2:73285657:73285725:-,chr2:73267983:73268060:-,chr2:73250317:73250343:-,chr2:73249651:73249705:-	0.23	0.11	0.37	0.36	0.23	0.5	-0.13	0.72	(0,0):219,(0,1):27,(1,0):6	0:6,1:27	(0,0):339,(0,1):33,(1,0):15	0:15,1:33	chr2	ENST00000474528.1	SFXN5	AFE	UTR5	NA	no_diff
chr2:220325548:220325718:+,chr2:220326604:220326779:+@chr2:220308396:220308781:+,chr2:220309375:220309464:+,chr2:220309547:220309883:+,chr2:220312696:220313993:+,chr2:220315858:220316001:+,chr2:220316347:220316529:+	0.41	0.21	0.62	0.57	0.43	0.7	-0.16	0.7	(0,0):33,(0,1):49,(1,0):4	0:4,1:49	(0,0):81,(0,1):77,(1,0):13	0:13,1:77	chr2	ENST00000498378.1	SPEG	AFE	UTR5	NA	no_diff
chr2:220325548:220325718:+,chr2:220326604:220326779:+@chr2:220306773:220306805:+,chr2:220307830:220307872:+,chr2:220308768:220308781:+,chr2:220309375:220309464:+,chr2:220309547:220309706:+,chr2:220312696:220313993:+,chr2:220315858:220316001:+,chr2:220316347:220316529:+	0.49	0.26	0.7	0.63	0.46	0.74	-0.14	0.6	(0,0):64,(0,1):29,(1,0):4	0:4,1:29	(0,0):129,(0,1):50,(1,0):13	0:13,1:50	chr2	ENST00000498378.1	SPEG	AFE	UTR5	NA	no_diff
chr17:49284249:49284366:-@chr17:49337196:49337427:-,chr17:49336504:49336567:-,chr17:49302369:49302570:-	0.56	0.33	0.77	0.42	0.26	0.58	0.14	0.66	(0,0):67,(0,1):27,(1,0):4	0:4,1:27	(0,0):277,(0,1):104,(1,0):8	0:8,1:104	chr17	ENST00000591270.1	MBTD1	AFE	UTR5	NA	no_diff
chr17:74379058:74379610:+,chr17:74381532:74382218:+@chr17:74380731:74381250:+	0.14	0.06	0.24	0.25	0.13	0.4	-0.11	0.53	(0,0):12,(0,1):17,(1,0):6	0:6,1:17	(0,0):14,(0,1):15,(1,0):12	0:12,1:15	chr17	ENST00000545180.1	SPHK1	AFE	UTR5	NA	no_diff
chr17:76121807:76121965:-,chr17:76121239:76121344:-@chr17:76122858:76123039:-	0.61	0.43	0.78	0.5	0.36	0.64	0.11	0.52	(0,0):61,(0,1):8,(1,0):23	0:23,1:8	(0,0):85,(0,1):19,(1,0):34	0:34,1:19	chr17	ENST00000392467.3	TMC6	AFE	UTR5	NA	no_diff
chr17:77039675:77040205:+@chr17:77021745:77022017:+	0.64	0.39	0.83	0.75	0.54	0.91	-0.11	0.47	(0,0):49,(0,1):4,(1,0):17	0:17,1:4	(0,0):42,(0,1):3,(1,0):23	0:23,1:3	chr17	ENST00000579760.1	C1QTNF1	AFE	UTR5	NA	no_diff
chr17:12847386:12847513:+@chr17:12692829:12693208:+,chr17:12798257:12798296:+,chr17:12799724:12799828:+,chr17:12812214:12812290:+,chr17:12819217:12819328:+,chr17:12823072:12823148:+,chr17:12844373:12844441:+	0.69	0.6	0.78	0.56	0.45	0.66	0.13	0.94	(0,0):119,(0,1):133,(1,0):22	0:22,1:133	(0,0):206,(0,1):232,(1,0):21	0:21,1:232	chr17	ENST00000379672.5	ARHGAP44	AFE	UTR5	NA	no_diff
chr17:56378594:56382749:-@chr17:56383703:56383774:-,chr17:56383194:56383226:-,chr17:56382901:56383004:-	0.28	0.11	0.64	0.12	0.06	0.21	0.16	0.57	(0,0):6,(0,1):4,(1,0):33	0:33,1:4	(0,0):13,(0,1):11,(1,0):39	0:39,1:11	chr17	ENST00000581675.1	BZRAP1	AFE	UTR5	NA	no_diff
chr17:37347727:37350136:-,chr17:37343732:37343854:-,chr17:37343046:37343182:-,chr17:37342749:37342825:-,chr17:37341384:37341403:-,chr17:37341037:37341117:-@chr17:37353665:37353901:-	0.53	0.29	0.82	0.69	0.48	0.9	-0.16	0.64	(0,0):25,(0,1):3,(1,0):61	0:61,1:3	(0,0):46,(0,1):2,(1,0):89	0:89,1:2	chr17	ENST00000394303.3	CACNB1	AFE	UTR5	NA	no_diff
chr10:35484055:35484142:+@chr10:35415801:35416121:+,chr10:35437296:35437419:+	0.18	0.01	0.47	0.29	0.07	0.6	-0.11	0.63	(0,0):412,(0,1):85	0:0,1:85	(0,0):537,(0,1):86,(1,0):1	0:1,1:86	chr10	ENST00000354759.3	CREM	AFE	UTR5	NA	no_diff
chr10:99221253:99221558:-@chr10:99258453:99258513:-,chr10:99258030:99258149:-	0.59	0.39	0.83	0.71	0.55	0.84	-0.12	0.48	(0,0):750,(0,1):6,(1,0):19	0:19,1:6	(0,0):2170,(0,1):9,(1,0):49	0:49,1:9	chr10	ENST00000438925.2	MMS19	AFE	UTR5	NA	no_diff
chr10:35484055:35484142:+@chr10:35415801:35416121:+,chr10:35426710:35426807:+	0.28	0	0.7	0.47	0.1	0.78	-0.19	0.84	(0,0):477,(0,1):20	0:0,1:20	(0,0):601,(0,1):22,(1,0):1	0:1,1:22	chr10	ENST00000354759.3	CREM	AFE	UTR5	NA	no_diff
chr10:133753535:133753700:+,chr10:133754086:133754345:+,chr10:133757472:133757649:+@chr10:133747960:133748059:+	0.45	0.31	0.62	0.65	0.48	0.84	-0.2	0.99	(0,0):169,(0,1):10,(1,0):155	0:155,1:10	(0,0):281,(0,1):6,(1,0):232	0:232,1:6	chr10	ENST00000455566.1	PPP2R2D	AFE	UTR5	NA	no_diff
chr16:711065:711501:+,chr16:711597:711787:+,chr16:711891:712059:+,chr16:712220:712331:+,chr16:712673:712844:+@chr16:707762:707892:+	0.65	0.31	0.93	0.76	0.55	0.96	-0.11	0.54	(0,0):32,(0,1):1,(1,0):37	0:37,1:1	(0,0):163,(0,1):2,(1,0):138	0:138,1:2	chr16	ENST00000445361.2	MSLN	AFE	UTR5	NA	no_diff
chr16:30207111:30208422:+,chr16:30208591:30208678:+,chr16:30212046:30212197:+@chr16:29472703:29472854:+	0.5	0.36	0.67	0.36	0.25	0.49	0.14	0.69	(0,0):66766,(0,1):10,(1,0):183	0:183,1:10	(0,0):78856,(0,1):17,(1,0):180	0:180,1:17	chr16	ENST00000345535.4	SLX1A	AFE	UTR5	NA	no_diff
chr16:57079360:57079404:+,chr16:57080464:57080553:+@chr16:57059280:57060930:+	0.56	0.29	0.77	0.37	0.05	0.67	0.19	0.79	(0,0):44,(0,1):70,(1,0):4	0:4,1:70	(0,0):66,(0,1):78,(1,0):2	0:2,1:78	chr16	ENST00000539881.1	NLRC5	AFE	UTR5	NA	no_diff
chr16:30205213:30206548:+,chr16:30208295:30208422:+,chr16:30208591:30208678:+,chr16:30212046:30212197:+@chr16:29466401:29466445:+,chr16:29469249:29469336:+,chr16:29472703:29472854:+	0.67	0.59	0.75	0.57	0.49	0.64	0.1	0.64	(0,0):66859,(0,1):30,(1,0):472	0:472,1:30	(0,0):79065,(0,1):39,(1,0):395	0:395,1:39	chr16	ENST00000305321.4	BOLA2B	AFE	UTR5	NA	no_diff
chr16:30205208:30206112:+,chr16:30206207:30206548:+,chr16:30208295:30208422:+,chr16:30208591:30208678:+,chr16:30212046:30212197:+@chr16:29472703:29472854:+	0.71	0.58	0.84	0.55	0.44	0.68	0.16	0.92	(0,0):66473,(0,1):10,(1,0):476	0:476,1:10	(0,0):78633,(0,1):17,(1,0):403	0:403,1:17	chr16	ENST00000305321.4	BOLA2B	AFE	UTR5	NA	no_diff
chr16:30207111:30208422:+,chr16:30208591:30208678:+,chr16:30212046:30212197:+@chr16:29471194:29471306:+,chr16:29472703:29472854:+	0.65	0.52	0.77	0.54	0.43	0.65	0.11	0.47	(0,0):66786,(0,1):13,(1,0):183	0:183,1:13	(0,0):78877,(0,1):21,(1,0):180	0:180,1:21	chr16	ENST00000345535.4	SLX1A	AFE	UTR5	NA	no_diff
chr4:128932828:128932855:+,chr4:128938518:128938656:+@chr4:128886461:128886761:+,chr4:128904094:128904202:+	0.53	0.31	0.72	0.41	0.25	0.56	0.12	0.54	(0,0):40,(0,1):19,(1,0):6	0:6,1:19	(0,0):125,(0,1):56,(1,0):11	0:11,1:56	chr4	ENST00000398965.1	C4orf29	AFE	UTR5	NA	no_diff
chr4:128930705:128930776:+,chr4:128932838:128932855:+,chr4:128938518:128938656:+@chr4:128886461:128886761:+,chr4:128904094:128904202:+	0.41	0.21	0.61	0.31	0.17	0.45	0.1	0.41	(0,0):40,(0,1):19,(1,0):6	0:6,1:19	(0,0):125,(0,1):56,(1,0):11	0:11,1:56	chr4	ENST00000398965.1	C4orf29	AFE	UTR5	NA	no_diff
chr4:128930705:128930776:+,chr4:128932838:128932855:+,chr4:128938518:128938656:+@chr4:128886461:128886761:+,chr4:128904094:128904202:+,chr4:128905494:128905578:+,chr4:128930075:128930153:+,chr4:128930262:128930356:+	0.43	0.21	0.65	0.33	0.2	0.46	0.1	0.45	(0,0):31,(0,1):28,(1,0):6	0:6,1:28	(0,0):97,(0,1):84,(1,0):11	0:11,1:84	chr4	ENST00000398965.1	C4orf29	AFE	UTR5	NA	no_diff
chr4:128932828:128932855:+,chr4:128938518:128938656:+@chr4:128886461:128886761:+,chr4:128904094:128904202:+,chr4:128905494:128905578:+,chr4:128930075:128930153:+,chr4:128930262:128930356:+	0.57	0.36	0.74	0.45	0.3	0.6	0.12	0.54	(0,0):31,(0,1):28,(1,0):6	0:6,1:28	(0,0):97,(0,1):84,(1,0):11	0:11,1:84	chr4	ENST00000398965.1	C4orf29	AFE	UTR5	NA	no_diff
chr15:70387065:70387124:-,chr15:70386871:70386915:-@chr15:70388500:70388943:-	0.38	0.04	0.71	0.27	0.05	0.53	0.11	0.79	(0,0):339,(0,1):23,(1,0):1	0:1,1:23	(0,0):649,(0,1):46,(1,0):1	0:1,1:46	chr15	ENST00000558939.1	TLE3	AFE	UTR5	NA	no_diff
chr15:57972896:57972988:+,chr15:57976600:57976872:+,chr15:58001383:58001556:+@chr15:57998901:57999153:+	0.63	0.47	0.79	0.77	0.65	0.87	-0.14	0.71	(0,0):281,(0,1):8,(1,0):36	0:36,1:8	(0,0):616,(0,1):9,(1,0):84	0:84,1:9	chr15	ENST00000380569.2	GCOM1	AFE	UTR5	NA	no_diff
chr15:57972896:57972988:+,chr15:57976600:57976872:+,chr15:58001383:58001556:+@chr15:57998901:57999339:+	0.75	0.62	0.87	0.85	0.77	0.92	-0.1	0.45	(0,0):280,(0,1):9,(1,0):36	0:36,1:9	(0,0):614,(0,1):11,(1,0):84	0:84,1:11	chr15	ENST00000380569.2	GCOM1	AFE	UTR5	NA	no_diff
chr15:42128979:42129138:+,chr15:42129266:42129572:+,chr15:42132223:42132428:+,chr15:42132722:42132858:+,chr15:42132972:42133103:+,chr15:42133253:42133293:+,chr15:42133429:42133471:+,chr15:42133715:42133769:+,chr15:42134017:42134147:+,chr15:42134391:42134474:+,chr15:42135874:42136009:+,chr15:42136669:42136805:+@chr15:42120283:42120386:+	0.46	0.2	0.83	0.36	0.17	0.62	0.1	0.64	(0,0):126,(0,1):2,(1,0):56	0:56,1:2	(0,0):187,(0,1):4,(1,0):83	0:83,1:4	chr15	ENST00000397299.4	JMJD7	AFE	UTR5	NA	no_diff
chr6:33235459:33235516:-@chr6:33218049:33218764:-	0.55	0.14	0.96	0.5	0.07	0.93	0.05	0.94	(0,0):630,(0,1):269	0:0,1:269	(0,0):1706,(0,1):687	0:0,1:687	chr6	ENST00000482399.1	VPS52	ALE	UTR3	NA@SF2,ConservedRegion,PAS	no_diff
chr13:103524548:103524748:+@chr13:103527657:103528345:+	0.27	0.06	0.51	0.3	0.19	0.42	-0.03	0.35	(0,0):13,(0,1):26,(1,0):2	0:2,1:26	(0,0):78,(0,1):143,(1,0):12	0:12,1:143	chr13	ENST00000355739.4	ERCC5	ALE	UTR3	NA@SF2,ConservedRegion,PAS	no_diff
chr12:58023114:58024115:-@chr12:58019551:58020744:-	0.41	0.31	0.5	0.32	0.23	0.41	0.09	0.41	(0,0):37,(0,1):58,(1,0):33	0:33,1:58	(0,0):68,(0,1):66,(1,0):25	0:25,1:66	chr12	ENST00000553142.1	B4GALNT1	ALE	UTR3	MIR,PAS,L2b@ConservedRegion,PAS	no_diff
chr12:28115254:28116703:-@chr12:28111017:28111501:-	0.9	0.79	0.97	0.82	0.68	0.93	0.08	0.38	(0,0):18,(0,1):2,(1,0):88	0:88,1:2	(0,0):19,(0,1):6,(1,0):99	0:99,1:6	chr12	ENST00000535992.1	PTHLH	ALE	UTR3	T-rich,MIRb,PAS@hsa-miR-15a,hsa-miR-93,hsa-miR-33b,hsa-miR-15b,hsa-miR-190,ConservedRegion,hsa-miR-106b,PAS,hsa-miR-33a,hsa-miR-16	no_diff
chr12:113733765:113733934:+@chr12:113734708:113736389:+	0.29	0.14	0.49	0.29	0.14	0.44	0	0.34	(0,0):98,(0,1):164,(1,0):4	0:4,1:164	(0,0):152,(0,1):247,(1,0):6	0:6,1:247	chr12	ENST00000335509.6	TPCN1	ALE	UTR3	ConservedRegion,hsa-miR-153@K-BOX,ConservedRegion,PAS	no_diff
chr12:109201388:109201603:-@chr12:109185696:109186605:-	0.54	0.41	0.65	0.54	0.45	0.63	0	0.21	(0,0):160,(0,1):86,(1,0):18	0:18,1:86	(0,0):297,(0,1):169,(1,0):35	0:35,1:169	chr12	ENST00000326495.5	SSH1	ALE	UTR3	NA@AluY,ConservedRegion,PAS	no_diff
chr12:132475181:132475259:+@chr12:132561946:132565005:+	0.39	0.03	0.81	0.41	0.15	0.65	-0.02	0.75	(0,0):402,(0,1):174	0:0,1:174	(0,0):4196,(0,1):1663,(1,0):2	0:2,1:1663	chr12	ENST00000541296.1	EP400	ALE	UTR3	NA@K-BOX,ConservedRegion,PAS,hsa-miR-26a,UNR-bs	no_diff
chrX:134483035:134483239:+,chrX:134482679:134482762:+@chrX:134494118:134497338:+	0.59	0.37	0.77	0.66	0.58	0.73	-0.07	0.32	(0,0):10,(0,1):47,(1,0):5	0:5,1:47	(0,0):95,(0,1):275,(1,0):38	0:38,1:275	chrX	ENST00000339249.4	ZNF449	ALE	UTR3	IRES,MER33,ConservedRegion,uORF,TOP@ConservedRegion,MER103C,BRD-BOX,K-BOX,PAS,(CA)n	no_diff
chr7:13945823:13946224:-@chr7:13930856:13935712:-	0.51	0.35	0.66	0.5	0.41	0.58	0.01	0.24	(0,0):15,(0,1):145,(1,0):11	0:11,1:145	(0,0):89,(0,1):442,(1,0):31	0:31,1:442	chr7	ENST00000430479.1	ETV1	ALE	UTR3	NA@T-rich,hsa-miR-105,hsa-miR-93,ConservedRegion,hsa-miR-211,hsa-miR-23b,hsa-miR-448,hsa-miR-548c-3p,hsa-miR-548c-5p,AT_rich,hsa-miR-106b,PAS,MLT1D	no_diff
chr7:13946055:13946224:-@chr7:13930856:13935712:-	0.76	0.62	0.86	0.76	0.69	0.83	0	0.18	(0,0):15,(0,1):145,(1,0):11	0:11,1:145	(0,0):90,(0,1):442,(1,0):30	0:30,1:442	chr7	ENST00000430479.1	ETV1	ALE	UTR3	NA@T-rich,hsa-miR-105,hsa-miR-93,ConservedRegion,hsa-miR-211,hsa-miR-23b,hsa-miR-448,hsa-miR-548c-3p,hsa-miR-548c-5p,AT_rich,hsa-miR-106b,PAS,MLT1D	no_diff
chr7:89791228:89791565:+@chr7:89793791:89794141:+	0.44	0.28	0.59	0.45	0.34	0.57	-0.01	0.25	(0,0):21,(0,1):17,(1,0):12	0:12,1:17	(0,0):45,(0,1):33,(1,0):26	0:26,1:33	chr7	ENST00000297205.2	STEAP1	ALE	UTR3	SF2@ConservedRegion,PAS	no_diff
chr7:102913539:102916074:-@chr7:102815720:102815858:-	0.65	0.32	0.89	0.56	0.36	0.74	0.09	0.54	(0,0):89,(0,1):1,(1,0):75	0:75,1:1	(0,0):331,(0,1):4,(1,0):184	0:184,1:4	chr7	ENST00000439473.1	DPY19L2P2	ALE	UTR3	NA@NA	no_diff
chr11:1006528:1006617:+@chr11:1010548:1012240:+	0.76	0.53	0.88	0.71	0.57	0.81	0.05	0.34	(0,0):187,(0,1):155,(1,0):6	0:6,1:155	(0,0):564,(0,1):554,(1,0):15	0:15,1:554	chr11	ENST00000448903.2	AP2A2	ALE	UTR3	NA@ConservedRegion,PAS	no_diff
chr11:770550:771426:-@chr11:767227:767373:-	0.41	0.3	0.54	0.42	0.33	0.53	-0.01	0.2	(0,0):691,(0,1):19,(1,0):144	0:144,1:19	(0,0):1067,(0,1):27,(1,0):209	0:209,1:27	chr11	ENST00000397472.2	PDDC1	ALE	UTR3	ConservedRegion@PAS	no_diff
chr11:68503600:68506256:-@chr11:68474908:68475968:-	0.79	0.62	0.91	0.85	0.72	0.94	-0.06	0.33	(0,0):9,(0,1):4,(1,0):39	0:39,1:4	(0,0):11,(0,1):2,(1,0):43	0:43,1:2	chr11	ENST00000255087.5	MTL5	ALE	UTR3	AluSx,ConservedRegion,BRD-BOX,PAS,CT-rich@G-rich,ConservedRegion,K-BOX,PAS	no_diff
chr11:68514615:68514834:-@chr11:68503600:68506256:-	0.78	0.63	0.88	0.74	0.57	0.85	0.04	0.27	(0,0):37,(0,1):39,(1,0):9	0:9,1:39	(0,0):49,(0,1):43,(1,0):8	0:8,1:43	chr11	ENST00000255087.5	MTL5	ALE	UTR3	NA@AluSx,ConservedRegion,BRD-BOX,CT-rich,PAS	no_diff
chr11:17167331:17167489:-@chr11:17108124:17111467:-	0.33	0.05	0.63	0.26	0.17	0.36	0.07	0.47	(0,0):121,(0,1):93,(1,0):1	0:1,1:93	(0,0):2104,(0,1):1443,(1,0):13	0:13,1:1443	chr11	ENST00000531428.1	PIK3C2A	ALE	UTR3	ConservedRegion,PAS@AluSx,ConservedRegion,AluSq2,PAS,(CA)n	no_diff
chr16:28848049:28848558:+,chr16:28847647:28847811:+@chr16:28848072:28848558:+	0.53	0.37	0.7	0.52	0.43	0.63	0.01	0.26	(0,0):144,(1,0):42,(1,1):183	0:158,1:67	(0,0):447,(1,0):112,(1,1):482	0:371,1:223	chr16	ENST00000340394.8	ATXN2L	ALE	UTR3	ConservedRegion@NA	no_diff
chr16:50344365:50344439:+@chr16:50349270:50352043:+	0.47	0.11	0.85	0.55	0.11	0.88	-0.08	0.92	(0,0):201,(0,1):247	0:0,1:247	(0,0):528,(0,1):649	0:0,1:649	chr16	ENST00000538642.1	ADCY7	ALE	UTR3	PAS@(CAAA)n,ConservedRegion,MER91B,PAS	no_diff
chr16:30771360:30771774:-@chr16:30768752:30768975:-	0.49	0.37	0.6	0.54	0.43	0.65	-0.05	0.28	(0,0):155,(0,1):28,(1,0):59	0:59,1:28	(0,0):149,(0,1):23,(1,0):61	0:61,1:23	chr16	ENST00000563588.1	PHKG2	ALE	UTR3	MIRb,ConservedRegion,PAS@ConservedRegion,PAS	no_diff
chr16:71663270:71663577:+@chr16:71674293:71675868:+	0.26	0.17	0.36	0.19	0.1	0.29	0.07	0.31	(0,0):376,(0,1):268,(1,0):15	0:15,1:268	(0,0):510,(0,1):272,(1,0):9	0:9,1:272	chr16	ENST00000567566.1	MARVELD3	ALE	UTR3	NA@AluSx,ConservedRegion,AluSq2,PAS	no_diff
chr5:136969726:136969854:-@chr5:136953189:136957815:-	0.34	0.07	0.72	0.25	0.03	0.59	0.09	0.6	(0,0):15,(0,1):79	0:0,1:79	(0,0):39,(0,1):152	0:0,1:152	chr5	ENST00000506491.1	KLHL3	ALE	UTR3	NA@(TG)n,ConservedRegion,MER94,(CAAAA)n,AT_rich,PAS,(TTA)n,GY-BOX,UNR-bs	no_diff
chr2:27870703:27870810:+@chr2:27872982:27873713:+,chr2:27865296:27865386:+	0.66	0.6	0.72	0.73	0.69	0.77	-0.07	0.43	(0,0):512,(0,1):725,(1,0):66	0:66,1:725	(0,0):630,(0,1):773,(1,0):95	0:95,1:773	chr2	ENST00000458167.2	GPN1	ALE	UTR3	NA@ConservedRegion,uORF,PAS	no_diff
chr2:27870703:27870810:+@chr2:27872982:27873713:+	0.66	0.6	0.71	0.72	0.67	0.76	-0.06	0.3	(0,0):345,(0,1):661,(1,0):66	0:66,1:661	(0,0):435,(0,1):718,(1,0):95	0:95,1:718	chr2	ENST00000458167.2	GPN1	ALE	UTR3	NA@ConservedRegion,uORF,PAS	no_diff
chr2:230875412:230877825:+@chr2:230947869:230948016:+,chr2:230931376:230931493:+	0.72	0.39	0.96	0.7	0.44	0.93	0.02	0.56	(0,0):1039,(1,0):22	00:22:00	(0,0):1789,(0,1):1,(1,0):43	0:43,1:1	chr2	ENST00000373652.3	FBXO36	ALE	UTR3	(TTTTC)n,AluSz,ConservedRegion,BRD-BOX,PAS,(TA)n@NA	no_diff
chr2:121684937:121685042:+@chr2:121745784:121750229:+	0.6	0.27	0.82	0.58	0.36	0.74	0.02	0.49	(0,0):175,(0,1):156,(1,0):2	0:2,1:156	(0,0):521,(0,1):411,(1,0):5	0:5,1:411	chr2	ENST00000482119.1	GLI2	ALE	UTR3	NA@ConservedRegion,(CA)n	no_diff
chr2:174081843:174082156:+@chr2:174085878:174091873:+	0.41	0.29	0.53	0.44	0.38	0.5	-0.03	0.18	(0,0):80,(0,1):548,(1,0):16	0:16,1:548	(0,0):264,(0,1):2148,(1,0):68	0:68,1:2148	chr2	ENST00000539448.1	AC013461.1	ALE	UTR3	NA@AluSx,MER20B,ConservedRegion,BRD-BOX,L2a,AluJo,MIR,AT_rich,PAS,GY-BOX,UNR-bs	no_diff
chr2:63053222:63053716:+@chr2:63272545:63273621:+	0.22	0.12	0.35	0.26	0.2	0.31	-0.04	0.2	(0,0):259,(0,1):71,(1,0):8	0:8,1:71	(0,0):1693,(0,1):360,(1,0):52	0:52,1:360	chr2	ENST00000405015.3	EHBP1	ALE	UTR3	ConservedRegion@ConservedRegion,PAS	no_diff
chr2:70900461:70900479:-@chr2:70890376:70890867:-,chr2:70900010:70900138:-	0.42	0.06	0.83	0.39	0.04	0.86	0.03	0.71	(0,0):82,(0,1):245	0:0,1:245	(0,0):126,(0,1):362	0:0,1:362	chr2	ENST00000403045.2	ADD2	ALE	UTR3	NA@NA	no_diff
chr2:63630844:63631792:-@chr2:63348535:63349191:-	0.53	0.33	0.74	0.56	0.45	0.66	-0.03	0.34	(0,0):28,(0,1):8,(1,0):13	0:13,1:8	(0,0):119,(0,1):24,(1,0):45	0:45,1:24	chr2	ENST00000409354.2	WDPCP	ALE	UTR3	ConservedRegion@ConservedRegion,K-BOX,PAS,AluJr4	no_diff
chr2:241492168:241492474:-@chr2:241461432:241463798:-	0.31	0.18	0.44	0.4	0.28	0.51	-0.09	0.36	(0,0):70,(0,1):218,(1,0):10	0:10,1:218	(0,0):171,(0,1):220,(1,0):15	0:15,1:220	chr2	ENST00000373318.2	ANKMY1	ALE	UTR3	NA@Charlie1a,LTR12_,K-BOX	no_diff
chr2:24092533:24092631:-@chr2:23971534:23974957:-	0.48	0.03	0.82	0.47	0.23	0.69	0.01	0.72	(0,0):91,(0,1):62	0:0,1:62	(0,0):841,(0,1):554,(1,0):4	0:4,1:554	chr2	ENST00000439915.1	ATAD2B	ALE	UTR3	NA@ConservedRegion,K-BOX,AT_rich,PAS	no_diff
chr2:29383199:29383333:+@chr2:29404438:29406674:+	0.49	0.18	0.73	0.53	0.37	0.67	-0.04	0.43	(0,0):71,(0,1):73,(1,0):2	0:2,1:73	(0,0):200,(0,1):334,(1,0):11	0:11,1:334	chr2	ENST00000401605.1	CLIP4	ALE	UTR3	NA@ConservedRegion,BRD-BOX,MIR3,SF2,PAS	no_diff
chr17:42158939:42160040:-@chr17:42154121:42155783:-	0.47	0.33	0.6	0.46	0.35	0.58	0.01	0.23	(0,0):790,(0,1):34,(1,0):20	0:20,1:34	(0,0):839,(0,1):47,(1,0):25	0:25,1:47	chr17	ENST00000336057.5	HDAC5	ALE	UTR3	Charlie16a,MIR,AluSx1,ConservedRegion@ConservedRegion,hsa-miR-198,PAS,GY-BOX,UNR-bs	no_diff
chr17:63553924:63554854:-@chr17:63534220:63534461:-	0.64	0.5	0.78	0.6	0.5	0.71	0.04	0.25	(0,0):89,(0,1):11,(1,0):102	0:102,1:11	(0,0):194,(0,1):24,(1,0):188	0:188,1:24	chr17	ENST00000307078.5	AXIN2	ALE	UTR3	ConservedRegion@NA	no_diff
chr17:63534220:63534461:-@chr17:63524683:63526220:-	0.44	0.29	0.58	0.48	0.37	0.57	-0.04	0.23	(0,0):166,(0,1):121,(1,0):11	0:11,1:121	(0,0):286,(0,1):228,(1,0):24	0:24,1:228	chr17	ENST00000307078.5	AXIN2	ALE	UTR3	NA@ConservedRegion,AT_rich,PAS	no_diff
chr17:38512261:38513894:+@chr17:38566921:38566941:+	0.59	0.19	0.93	0.51	0.1	0.98	0.08	0.8	(0,0):1577,(1,0):388	0.269444	(0,0):21502,(1,0):374	0.259722	chr17	ENST00000254066.5	RARA	ALE	UTR3	(CCCCAG)n,hsa-miR-218,ConservedRegion,AT_rich,PAS,hsa-miR-27b,(CA)n,hsa-miR-135a@NA	no_diff
chr3:195605920:195606046:-@chr3:195590236:195591058:-	0.56	0.33	0.73	0.48	0.34	0.58	0.08	0.39	(0,0):169,(0,1):71,(1,0):7	0:7,1:71	(0,0):457,(0,1):220,(1,0):15	0:15,1:220	chr3	ENST00000381916.2	TNK2	ALE	UTR3	NA@hsa-miR-326,ConservedRegion,hsa-miR-23b,PAS	no_diff
chr3:15455881:15456421:-@chr3:15422784:15425694:-,chr3:15452752:15452944:-	0.32	0.2	0.45	0.36	0.25	0.47	-0.04	0.25	(0,0):476,(0,1):122,(1,0):9	0:9,1:122	(0,0):762,(0,1):215,(1,0):19	0:19,1:215	chr3	ENST00000383790.3	METTL6	ALE	UTR3	AluSx1,AluJr@L1M5,ConservedRegion,HAL1,MER87,L1MA7,LTR49,K-BOX,FRAM,FLAM_C,PAS,AluJb,UNR-bs	no_diff
chr22:39421075:39421676:+@chr22:39428203:39429256:+	0.37	0.18	0.56	0.28	0.11	0.51	0.09	0.47	(0,0):39,(0,1):17,(1,0):5	0:5,1:17	(0,0):39,(0,1):19,(1,0):3	0:3,1:19	chr22	ENST00000381568.4	APOBEC3D	ALE	UTR3	NA@AluSx1,PAS,AluJb	no_diff
chr8:70667659:70667876:-@chr8:70584576:70585561:-	0.54	0.31	0.74	0.46	0.28	0.64	0.08	0.53	(0,0):33,(0,1):25,(1,0):5	0:5,1:25	(0,0):79,(0,1):50,(1,0):7	0:7,1:50	chr8	ENST00000260126.3	SLCO5A1	ALE	UTR3	NA@hsa-miR-218,ConservedRegion,PAS,hsa-miR-153	no_diff
chr8:143852615:143856781:-@chr8:143845756:143846159:-	0.71	0.35	0.99	0.65	0.33	0.92	0.06	0.51	(1,0):26	00:26:00	(0,0):2,(1,0):21	00:21:00	chr8	ENST00000335822.5	LYNX1	ALE	UTR3	MIR,PAS@PAS	no_diff
chr18:19281237:19282459:-@chr18:19236181:19237113:-	0.51	0.33	0.68	0.51	0.42	0.59	0	0.25	(0,0):88,(0,1):13,(1,0):18	0:18,1:13	(0,0):575,(0,1):60,(1,0):82	0:82,1:60	chr18	ENST00000289119.2	ABHD3	ALE	UTR3	ConservedRegion,AluJb@NA	no_diff
chr1:150936006:150936321:+@chr1:150936726:150937213:+	0.44	0.34	0.54	0.51	0.46	0.57	-0.07	0.31	(0,0):55,(0,1):71,(1,0):32	0:32,1:71	(0,0):208,(0,1):220,(1,0):134	0:134,1:220	chr1	ENST00000271640.5	SETDB1	ALE	UTR3	NA@ConservedRegion,PAS,GY-BOX	no_diff
chr1:150936006:150936321:+@chr1:150936723:150937211:+	0.44	0.33	0.54	0.51	0.45	0.56	-0.07	0.31	(0,0):55,(0,1):71,(1,0):32	0:32,1:71	(0,0):207,(0,1):221,(1,0):134	0:134,1:221	chr1	ENST00000271640.5	SETDB1	ALE	UTR3	NA@ConservedRegion,PAS,GY-BOX	no_diff
chr1:147589855:147590069:-@chr1:146032542:146034408:-	0.42	0.27	0.57	0.36	0.27	0.47	0.06	0.29	(0,0):5731,(0,1):183,(1,0):10	0:10,1:183	(0,0):13016,(0,1):445,(1,0):20	0:20,1:445	chr1	ENST00000480568.1	NBPF24	ALE	UTR3	NA@NA	no_diff
chr1:148011680:148011788:-@chr1:148003642:148004791:-	0.19	0.05	0.41	0.13	0.01	0.32	0.06	0.35	(0,0):218,(0,1):184,(1,0):1	0:1,1:184	(0,0):1244,(0,1):342,(1,0):1	0:1,1:342	chr1	ENST00000310701.10	NBPF14	ALE	UTR3	NA@L1MC4,PAS,UNR-bs	no_diff
chr1:147576820:147576928:-@chr1:146032542:146034408:-	0.19	0.05	0.43	0.25	0.08	0.45	-0.06	0.4	(0,0):5618,(0,1):183	0:0,1:183	(0,0):12629,(0,1):445,(1,0):3	0:3,1:445	chr1	ENST00000480568.1	NBPF24	ALE	UTR3	NA@NA	no_diff
chr14:77765798:77765904:-@chr14:77741299:77743824:-	0.61	0.44	0.75	0.7	0.6	0.77	-0.09	0.33	(0,0):598,(0,1):347,(1,0):8	0:8,1:347	(0,0):979,(0,1):665,(1,0):22	0:22,1:665	chr14	ENST00000261534.4	POMT2	ALE	UTR3	NA@ConservedRegion,hsa-miR-196b,PAS,hsa-miR-504,(TCCCC)n	no_diff
chr14:24842901:24843913:+@chr14:24845500:24846395:+	0.38	0.18	0.59	0.39	0.28	0.51	-0.01	0.32	(0,0):23,(0,1):13,(1,0):8	0:8,1:13	(0,0):53,(0,1):37,(1,0):27	0:27,1:37	chr14	ENST00000413692.2	NFATC4	ALE	UTR3	NA@ConservedRegion,MIR3,K-BOX	no_diff
chr14:75287760:75288814:+@chr14:75302478:75304013:+,chr14:75301968:75302150:+	0.27	0.14	0.4	0.18	0.14	0.23	0.09	0.34	(0,0):57,(0,1):43,(1,0):9	0:9,1:43	(0,0):584,(0,1):323,(1,0):43	0:43,1:323	chr14	ENST00000549293.1	YLPM1	ALE	UTR3	NA@ConservedRegion,CT-rich,PAS	no_diff
chr14:35577345:35577442:-@chr14:35554678:35554984:-	0.59	0.4	0.75	0.57	0.42	0.7	0.02	0.3	(0,0):191,(0,1):37,(1,0):6	0:6,1:37	(0,0):457,(0,1):90,(1,0):13	0:13,1:90	chr14	ENST00000553273.1	PPP2R3C	ALE	UTR3	ConservedRegion@ConservedRegion,PAS	no_diff
chr10:99379167:99379440:-@chr10:99374310:99376168:-	0.43	0.35	0.51	0.4	0.3	0.5	0.03	0.18	(0,0):134,(0,1):418,(1,0):36	0:36,1:418	(0,0):92,(0,1):319,(1,0):24	0:24,1:319	chr10	ENST00000307450.6	MORN4	ALE	UTR3	IRES@AluSg,ConservedRegion,AluJo,PAS,(TTA)n	no_diff
chr10:13708097:13708325:-@chr10:13685706:13689035:-,chr10:13693903:13693974:-	0.53	0.31	0.71	0.5	0.37	0.62	0.03	0.32	(0,0):114,(0,1):100,(1,0):6	0:6,1:100	(0,0):353,(0,1):300,(1,0):15	0:15,1:300	chr10	ENST00000358621.4	FRMD4A	ALE	UTR3	NA@hsa-miR-149,ConservedRegion,AT_rich,PAS,hsa-miR-135a	no_diff
chr10:44871365:44871480:-@chr10:44865605:44868791:-	0.28	0	0.73	0.24	0.01	0.62	0.04	0.48	(0,0):6,(0,1):59	0:0,1:59	(0,0):33,(0,1):120	0:0,1:120	chr10	ENST00000395795.4	CXCL12	ALE	UTR3	NA@ConservedRegion,hsa-miR-23b,PAS,GY-BOX	no_diff
chr15:43069122:43069440:-@chr15:43036544:43038455:-	0.5	0.31	0.67	0.55	0.46	0.63	-0.05	0.27	(0,0):87,(0,1):50,(1,0):7	0:7,1:50	(0,0):357,(0,1):226,(1,0):37	0:37,1:226	chr15	ENST00000567840.1	TTBK2	ALE	UTR3	PAS,(TTA)n@ConservedRegion,K-BOX,PAS,UNR-bs	no_diff
chr15:42606278:42607030:+@chr15:42644228:42645864:+	0.33	0.16	0.53	0.29	0.17	0.42	0.04	0.3	(0,0):34,(0,1):29,(1,0):6	0:6,1:29	(0,0):134,(0,1):67,(1,0):12	0:12,1:67	chr15	ENST00000566442.1	GANC	ALE	UTR3	NA@NA	no_diff
chr15:42619561:42619693:+@chr15:42644228:42645864:+	0.24	0.03	0.55	0.19	0.01	0.5	0.05	0.46	(0,0):29,(0,1):29	0:0,1:29	(0,0):94,(0,1):67	0:0,1:67	chr15	ENST00000318010.8	GANC	ALE	UTR3	NA@NA	no_diff
chr15:43856301:43856363:-@chr15:43825660:43827450:-	0.4	0.07	0.79	0.48	0.06	0.93	-0.08	0.91	(0,0):91,(0,1):215	0:0,1:215	(0,0):167,(0,1):364	0:0,1:364	chr15	ENST00000334933.4	PPIP5K1	ALE	UTR3	NA@ConservedRegion,AT_rich,PAS,UNR-bs	no_diff
chr9:114354440:114355262:-@chr9:114325253:114326542:-	0.58	0.44	0.7	0.54	0.43	0.65	0.04	0.25	(0,0):195,(0,1):28,(1,0):25	0:25,1:28	(0,0):366,(0,1):47,(1,0):34	0:34,1:47	chr9	ENST00000538962.1	PTGR1	ALE	UTR3	NA@SF2,PAS	no_diff
chr9:137293478:137298240:+@chr9:137313522:137319016:+	0.59	0.48	0.69	0.63	0.55	0.7	-0.04	0.2	(0,0):322,(0,1):39,(1,0):48	0:48,1:39	(0,0):708,(0,1):65,(1,0):96	0:96,1:65	chr9	ENST00000481739.1	RXRA	ALE	UTR3	NA@G-rich,MIR3,MIR,MLT1D	no_diff
chr6:33406552:33406886:+@chr6:33419537:33421466:+,chr6:33415607:33415710:+	0.24	0.05	0.49	0.42	0.23	0.58	-0.18	0.8	(0,0):100,(0,1):51,(1,0):2	0:2,1:51	(0,0):240,(0,1):91,(1,0):9	0:9,1:91	chr6	ENST00000479510.1	SYNGAP1	ALE	UTR3	NA	no_diff
chr6:33406552:33406886:+@chr6:33419537:33421466:+	0.26	0.08	0.51	0.42	0.26	0.57	-0.16	0.66	(0,0):101,(0,1):50,(1,0):2	0:2,1:50	(0,0):242,(0,1):89,(1,0):9	0:9,1:89	chr6	ENST00000479510.1	SYNGAP1	ALE	UTR3	NA	no_diff
chr6:158487476:158487980:+@chr6:158514920:158515126:+	0.89	0.66	0.99	0.78	0.64	0.91	0.11	0.59	(0,0):239,(1,0):26	00:26:00	(0,0):1174,(0,1):5,(1,0):67	0:67,1:5	chr6	ENST00000367121.3	SYNJ2	ALE	UTR3	NA	no_diff
chr6:33036796:33037077:-@chr6:33036258:33036581:-	0.67	0.56	0.77	0.78	0.67	0.86	-0.11	0.52	(0,0):47,(0,1):29,(1,0):49	0:49,1:29	(0,0):44,(0,1):16,(1,0):49	0:49,1:16	chr6	ENST00000419277	ENSG00000231389	ALE	UTR3	NA	no_diff
chr6:159049440:159049522:+@chr6:159052842:159056467:+	0.39	0.05	0.72	0.54	0.36	0.68	-0.15	0.62	(0,0):84,(0,1):576,(1,0):1	0:1,1:576	(0,0):453,(0,1):2562,(1,0):8	0:8,1:2562	chr6	ENST00000367090.3	TMEM181	ALE	UTR3	NA	no_diff
chr6:27806440:27806888:+@chr6:27819887:27819974:+	0.77	0.36	0.98	0.62	0.26	0.91	0.15	0.77	(0,0):27,(1,0):41	00:41:00	(0,0):70,(0,1):1,(1,0):47	0:47,1:1	chr6	ENST00000449538.2	HIST1H2BN	ALE	UTR3	NA	no_diff
chr6:41658739:41658973:-@chr6:41651716:41652816:-	0.62	0.47	0.73	0.46	0.28	0.59	0.16	0.92	(0,0):68,(0,1):56,(1,0):15	0:15,1:56	(0,0):118,(0,1):90,(1,0):12	0:12,1:90	chr6	ENST00000230323.4	TFEB	ALE	UTR3	NA	no_diff
chr13:52325446:52325801:+@chr13:52333876:52336171:+	0.33	0.21	0.47	0.22	0.12	0.33	0.11	0.5	(0,0):123,(0,1):170,(1,0):11	0:11,1:170	(0,0):209,(0,1):263,(1,0):9	0:9,1:263	chr13	ENST00000298125.4	WDFY2	ALE	UTR3	NA	no_diff
chr12:9572785:9572851:-@chr12:9570307:9571786:-	0.4	0.05	0.94	0.61	0.09	0.99	-0.21	0.99	(0,0):107,(0,1):179	0:0,1:179	(0,0):214,(0,1):385	0:0,1:385	chr12	ENST00000290818	ENSG00000214826	ALE	UTR3	NA	no_diff
chr12:11090007:11091176:-@chr12:11033560:11033655:-,chr12:11034816:11035087:-	0.39	0.22	0.57	0.51	0.34	0.67	-0.12	0.5	(0,0):45,(0,1):8,(1,0):19	0:19,1:8	(0,0):76,(0,1):8,(1,0):30	0:30,1:8	chr12	ENST00000381852.4	TAS2R14	ALE	UTR3	NA	no_diff
chr12:11090007:11091176:-@chr12:11033560:11033655:-,chr12:11034816:11035297:-	0.34	0.22	0.48	0.45	0.31	0.59	-0.11	0.52	(0,0):34,(0,1):19,(1,0):19	0:19,1:19	(0,0):67,(0,1):17,(1,0):30	0:30,1:17	chr12	ENST00000381852.4	TAS2R14	ALE	UTR3	NA	no_diff
chr12:120512247:120512341:+@chr12:120530804:120532299:+	0.31	0.1	0.6	0.21	0.03	0.47	0.1	0.58	(0,0):27,(0,1):60	0:0,1:60	(0,0):59,(0,1):83	0:0,1:83	chr12	ENST00000546420.1	CCDC64	ALE	UTR3	NA	no_diff
chr12:27800662:27800898:+@chr12:27845729:27848496:+	0.14	0	0.41	0.31	0.19	0.43	-0.17	0.82	(0,0):94,(0,1):62	0:0,1:62	(0,0):798,(0,1):441,(1,0):12	0:12,1:441	chr12	ENST00000545381.1	PPFIBP1	ALE	UTR3	NA	no_diff
chrX:46382464:46382560:-@chrX:46358546:46360770:-	0.43	0.07	0.78	0.29	0.07	0.67	0.14	0.76	(0,0):11,(0,1):36	0:0,1:36	(0,0):61,(0,1):114	0:0,1:114	chrX	ENST00000523374.1	ZNF674	ALE	UTR3	NA	no_diff
chrX:153784380:153784846:+@chrX:153791025:153791168:+	0.47	0.35	0.62	0.36	0.28	0.45	0.11	0.5	(0,0):206,(0,1):15,(1,0):76	0:76,1:15	(0,0):294,(0,1):30,(1,0):94	0:94,1:30	chrX	ENST00000369609.5	IKBKG	ALE	UTR3	NA	no_diff
chrX:153791025:153791168:+@chrX:153792534:153793261:+	0.38	0.27	0.5	0.51	0.41	0.6	-0.13	0.72	(0,0):106,(0,1):228,(1,0):15	0:15,1:228	(0,0):133,(0,1):270,(1,0):30	0:30,1:270	chrX	ENST00000369609.5	IKBKG	ALE	UTR3	NA	no_diff
chrX:117895101:117895477:+@chrX:117938895:117939459:+	0.77	0.64	0.89	0.88	0.8	0.95	-0.11	0.53	(0,0):641,(0,1):9,(1,0):21	0:21,1:9	(0,0):1678,(0,1):8,(1,0):42	0:42,1:8	chrX	ENST00000371666.3	IL13RA1	ALE	UTR3	NA	no_diff
chr20:34501171:34501269:+@chr20:34535407:34538288:+	0.35	0.08	0.72	0.23	0.08	0.43	0.12	0.68	(0,0):162,(0,1):184,(1,0):1	0:1,1:184	(0,0):795,(0,1):944,(1,0):2	0:2,1:944	chr20	ENST00000374012.3	PHF20	ALE	UTR3	NA	no_diff
chr7:73115158:73115261:-@chr7:73113540:73114814:-	0.44	0.26	0.63	0.25	0.07	0.47	0.19	0.74	(0,0):63,(0,1):301,(1,0):6	0:6,1:301	(0,0):59,(0,1):305,(1,0):2	0:2,1:305	chr7	ENST00000436944.1	WBSCR22	ALE	UTR3	NA	no_diff
chr11:18524033:18524124:-@chr11:18501858:18502182:-	0.5	0.31	0.67	0.65	0.56	0.72	-0.15	0.64	(0,0):414,(0,1):105,(1,0):8	0:8,1:105	(0,0):937,(0,1):235,(1,0):31	0:31,1:235	chr11	ENST00000251968.3	TSG101	ALE	UTR3	NA	no_diff
chr11:46920109:46920228:-@chr11:46878418:46880866:-	0.43	0.13	0.69	0.55	0.38	0.69	-0.12	0.49	(0,0):198,(0,1):110,(1,0):2	0:2,1:110	(0,0):856,(0,1):367,(1,0):9	0:9,1:367	chr11	ENST00000378623.1	LRP4	ALE	UTR3	NA	no_diff
chr16:75575248:75575353:-@chr16:75572015:75574072:-	0.44	0.22	0.64	0.54	0.36	0.69	-0.1	0.46	(0,0):39,(0,1):319,(1,0):4	0:4,1:319	(0,0):59,(0,1):417,(1,0):8	0:8,1:417	chr16	ENST00000460606.1	RP11-77K12.7	ALE	UTR3	NA	no_diff
chr5:138737190:138737514:-@chr5:138732458:138732618:-	0.72	0.55	0.88	0.57	0.37	0.75	0.15	0.54	(0,0):88,(0,1):5,(1,0):39	0:39,1:5	(0,0):137,(0,1):7,(1,0):26	0:26,1:7	chr5	ENST00000302091.5	SPATA24	ALE	UTR3	NA	no_diff
chr5:170669686:170670066:+@chr5:170725766:170727019:+	0.29	0.05	0.56	0.39	0.25	0.52	-0.1	0.48	(0,0):35,(0,1):22,(1,0):2	0:2,1:22	(0,0):159,(0,1):79,(1,0):13	0:13,1:79	chr5	ENST00000523189.1	RANBP17	ALE	UTR3	NA	no_diff
chr5:61800494:61800527:+@chr5:61922981:61924409:+	0.47	0.04	0.96	0.65	0.12	1	-0.18	0.74	(0,0):112,(0,1):101	0:0,1:101	(0,0):1046,(0,1):785	0:0,1:785	chr5	ENST00000424533.1	IPO11	ALE	UTR3	NA	no_diff
chr4:85566375:85566478:+@chr4:85570128:85570341:+,chr4:85569710:85570112:+	0.51	0.24	0.73	0.35	0.16	0.55	0.16	0.63	(0,0):28,(0,1):63,(1,0):4	0:4,1:63	(0,0):89,(0,1):140,(1,0):4	0:4,1:140	chr4	ENST00000295887.5	CDS1	ALE	UTR3	NA	no_diff
chr4:15482821:15483879:+@chr4:15512870:15513298:+	0.65	0.43	0.82	0.47	0.3	0.65	0.18	0.78	(0,0):12,(0,1):4,(1,0):22	0:22,1:4	(0,0):41,(0,1):9,(1,0):21	0:21,1:9	chr4	ENST00000413206.1	CC2D2A	ALE	UTR3	NA	no_diff
chr4:8297422:8298198:+@chr4:8307698:8308834:+	0.5	0.38	0.61	0.37	0.25	0.49	0.13	0.61	(0,0):15,(0,1):35,(1,0):23	0:23,1:35	(0,0):12,(0,1):51,(1,0):20	0:20,1:51	chr4	ENST00000307358.2	HTRA3	ALE	UTR3	NA	no_diff
chr4:1805419:1805563:+@chr4:1808843:1810598:+	0.55	0.35	0.73	0.45	0.28	0.63	0.1	0.48	(0,0):122,(0,1):88,(1,0):5	0:5,1:88	(0,0):238,(0,1):170,(1,0):6	0:6,1:170	chr4	ENST00000481110.2	FGFR3	ALE	UTR3	NA	no_diff
chr2:128081478:128081570:-@chr2:128062139:128065380:-	0.35	0.05	0.68	0.24	0.08	0.43	0.11	0.54	(0,0):167,(0,1):280,(1,0):1	0:1,1:280	(0,0):690,(0,1):1473,(1,0):2	0:2,1:1473	chr2	ENST00000409947.1	MAP3K2	ALE	UTR3	NA	no_diff
chr2:9599660:9599747:+@chr2:9613045:9613227:+	0.65	0.41	0.83	0.52	0.41	0.63	0.13	0.58	(0,0):110,(0,1):20,(1,0):6	0:6,1:20	(0,0):616,(0,1):140,(1,0):20	0:20,1:140	chr2	ENST00000238112.3	CPSF3	ALE	UTR3	NA	no_diff
chr17:45368320:45368565:+@chr17:45387505:45390077:+	0.6	0.34	0.8	0.46	0.22	0.68	0.14	0.57	(0,0):16,(0,1):25,(1,0):3	0:3,1:25	(0,0):59,(0,1):68,(1,0):4	0:4,1:68	chr17	ENST00000262017.2	ITGB3	ALE	UTR3	NA	no_diff
chr17:19812487:19812589:-@chr17:19808750:19809545:-	0.56	0.39	0.68	0.67	0.59	0.74	-0.11	0.51	(0,0):83,(0,1):232,(1,0):12	0:12,1:232	(0,0):166,(0,1):487,(1,0):41	0:41,1:487	chr17	ENST00000225737.6	AKAP10	ALE	UTR3	NA	no_diff
chr17:62481711:62481985:-@chr17:62473902:62474105:-	0.46	0.28	0.67	0.35	0.24	0.47	0.11	0.45	(0,0):77,(0,1):9,(1,0):11	0:11,1:9	(0,0):162,(0,1):26,(1,0):21	0:21,1:26	chr17	ENST00000539111.2	POLG2	ALE	UTR3	NA	no_diff
chr3:158178724:158178792:+@chr3:158261972:158262576:+	0.64	0.05	0.99	0.48	0	0.98	0.16	0.88	(0,0):113,(0,1):62	0:0,1:62	(0,0):267,(0,1):154	0:0,1:154	chr3	ENST00000295930.3	RSRC1	ALE	UTR3	NA	no_diff
chr3:49066132:49067139:-@chr3:49061762:49061837:-	0.52	0.16	0.88	0.67	0.29	0.99	-0.15	0.89	(0,0):1421,(1,0):88	0.0611111	(0,0):4516,(1,0):249	0.172917	chr3	ENST00000326739.4	IMPDH2	ALE	UTR3	NA	no_diff
chr19:17317488:17317627:+@chr19:17322704:17324104:+,chr19:17322456:17322595:+	0.44	0.27	0.62	0.3	0.21	0.42	0.14	0.7	(0,0):94,(0,1):175,(1,0):6	0:6,1:175	(0,0):468,(0,1):682,(1,0):13	0:13,1:682	chr19	ENST00000397274.2	MYO9B	ALE	UTR3	NA	no_diff
chr19:17317488:17317627:+@chr19:17322456:17324093:+	0.42	0.23	0.59	0.3	0.2	0.41	0.12	0.48	(0,0):81,(0,1):188,(1,0):6	0:6,1:188	(0,0):431,(0,1):719,(1,0):13	0:13,1:719	chr19	ENST00000397274.2	MYO9B	ALE	UTR3	NA	no_diff
chr19:17317488:17317627:+@chr19:17322704:17324104:+	0.42	0.25	0.61	0.29	0.19	0.4	0.13	0.53	(0,0):104,(0,1):165,(1,0):6	0:6,1:165	(0,0):494,(0,1):656,(1,0):13	0:13,1:656	chr19	ENST00000397274.2	MYO9B	ALE	UTR3	NA	no_diff
chr19:13201113:13201204:+@chr19:13205449:13209610:+	0.46	0.05	0.78	0.65	0.49	0.78	-0.19	0.73	(0,0):43,(0,1):452,(1,0):2	0:2,1:452	(0,0):127,(0,1):957,(1,0):9	0:9,1:957	chr19	ENST00000397661.2	NFIX	ALE	UTR3	NA	no_diff
chr22:30818266:30819828:+@chr22:30820705:30820926:+	0.8	0.56	0.95	0.63	0.48	0.79	0.17	0.88	(0,0):25,(0,1):1,(1,0):65	0:65,1:1	(0,0):36,(0,1):8,(1,0):140	0:140,1:8	chr22	ENST00000312932.8	SEC14L2	ALE	UTR3	NA	no_diff
chr22:18609125:18609261:+@chr22:18613610:18614498:+	0.8	0.6	0.91	0.63	0.41	0.8	0.17	0.78	(0,0):107,(0,1):18,(1,0):7	0:7,1:18	(0,0):148,(0,1):36,(1,0):5	0:5,1:36	chr22	ENST00000316027.6	TUBA8	ALE	UTR3	NA	no_diff
chr18:34238038:34238151:+@chr18:34359411:34360018:+	0.3	0.1	0.55	0.2	0.05	0.37	0.1	0.51	(0,0):387,(0,1):53,(1,0):2	0:2,1:53	(0,0):917,(0,1):145,(1,0):2	0:2,1:145	chr18	ENST00000589114.1	FHOD3	ALE	UTR3	NA	no_diff
chr1:11889253:11889379:+@chr1:11900200:11903201:+	0.5	0.28	0.69	0.33	0.16	0.54	0.17	0.75	(0,0):135,(0,1):247,(1,0):5	0:5,1:247	(0,0):301,(0,1):480,(1,0):4	0:4,1:480	chr1	ENST00000346436.6	CLCN6	ALE	UTR3	NA	no_diff
chr1:145074847:145075060:-@chr1:144951761:144952376:-	0.21	0.07	0.41	0.39	0.24	0.55	-0.18	0.95	(0,0):411,(0,1):48,(1,0):3	0:3,1:48	(0,0):802,(0,1):63,(1,0):11	0:11,1:63	chr1	ENST00000369348.3	PDE4DIP	ALE	UTR3	NA	no_diff
chr1:144827820:144827928:+@chr1:145368441:145370195:+	0.39	0.05	0.74	0.57	0.39	0.71	-0.18	0.77	(0,0):5407,(0,1):45,(1,0):1	0:1,1:45	(0,0):14652,(0,1):268,(1,0):8	0:8,1:268	chr1	ENST00000375552.3	NBPF9	ALE	UTR3	NA	no_diff
chr14:93125506:93127767:+@chr14:93151332:93151911:+	0.28	0.15	0.45	0.42	0.29	0.6	-0.14	0.68	(0,0):22,(0,1):11,(1,0):17	0:17,1:11	(0,0):51,(0,1):11,(1,0):33	0:33,1:11	chr14	ENST00000216487.7	RIN3	ALE	UTR3	NA	no_diff
chr14:68944365:68944810:+@chr14:69061202:69062614:+	0.44	0.21	0.65	0.31	0.12	0.5	0.13	0.64	(0,0):19,(0,1):21,(1,0):5	0:5,1:21	(0,0):96,(0,1):38,(1,0):4	0:4,1:38	chr14	ENST00000479335.1	RAD51B	ALE	UTR3	NA	no_diff
chr10:118892801:118894094:-@chr10:118888032:118891813:-	0.83	0.74	0.9	0.72	0.63	0.8	0.11	0.69	(0,0):32,(0,1):24,(1,0):39	0:39,1:24	(0,0):37,(0,1):39,(1,0):34	0:34,1:39	chr10	ENST00000277905.2	VAX1	ALE	UTR3	NA	no_diff
chr10:21884260:21884369:+@chr10:22030868:22032554:+,chr10:22029083:22029165:+	0.48	0.22	0.71	0.64	0.52	0.74	-0.16	0.58	(0,0):300,(0,1):132,(1,0):3	0:3,1:132	(0,0):1208,(0,1):459,(1,0):18	0:18,1:459	chr10	ENST00000377072.3	MLLT10	ALE	UTR3	NA	no_diff
chr10:21884260:21884369:+@chr10:22030868:22032554:+	0.49	0.19	0.72	0.66	0.54	0.75	-0.17	0.57	(0,0):320,(0,1):112,(1,0):3	0:3,1:112	(0,0):1258,(0,1):409,(1,0):18	0:18,1:409	chr10	ENST00000377072.3	MLLT10	ALE	UTR3	NA	no_diff
chr10:21884260:21884369:+@chr10:21962279:21962939:+	0.49	0.21	0.72	0.66	0.54	0.76	-0.17	0.57	(0,0):65,(0,1):49,(1,0):3	0:3,1:49	(0,0):322,(0,1):148,(1,0):18	0:18,1:148	chr10	ENST00000377072.3	MLLT10	ALE	UTR3	NA	no_diff
chr10:85973838:85977121:+@chr10:85978835:85979374:+	0.62	0.42	0.81	0.72	0.57	0.9	-0.1	0.41	(0,0):5,(0,1):5,(1,0):56	0:56,1:5	(0,0):11,(0,1):7,(1,0):126	0:126,1:7	chr10	ENST00000332904.3	CDHR1	ALE	UTR3	NA	no_diff
chr9:119380588:119380751:-@chr9:119187507:119188367:-	0.42	0.18	0.64	0.6	0.44	0.72	-0.18	0.61	(0,0):48,(0,1):42,(1,0):4	0:4,1:42	(0,0):101,(0,1):53,(1,0):10	0:10,1:53	chr9	ENST00000373986.3	ASTN2	ALE	UTR3	NA	no_diff
chr9:103102451:103102651:-@chr9:103064370:103064586:-	0.29	0.13	0.47	0.17	0.1	0.24	0.12	0.51	(0,0):283,(0,1):21,(1,0):7	0:7,1:21	(0,0):1895,(0,1):102,(1,0):17	0:17,1:102	chr9	ENST00000535814.1	TEX10	ALE	UTR3	NA	no_diff
chr7:50823584:50823761:-@chr7:50799969:50799969:-@chr7:50772837:50772837:-@chr7:50771518:50771605:-	0.61	0.45	0.76	0.56	0.42	0.69	0.05	0.31	(0,0):98,(0,1):16,(1,0):16,(1,1):34	0:41,1:25	(0,0):177,(0,1):23,(1,0):18,(1,1):38	0:40,1:39	chr7	ENST00000335866.3	GRB10	MXE	CDS	NA	no_diff
chr10:51613218:51613311:-@chr10:51612904:51612904:-@chr10:51610393:51610393:-@chr10:51606274:51607098:-	0.64	0.58	0.69	0.58	0.53	0.64	0.06	0.24	(0,0):656,(0,1):104,(1,0):198,(1,1):143	0:297,1:148	(0,0):636,(0,1):134,(1,0):203,(1,1):139	0:284,1:192	chr10	ENST00000260867.4	TIMM23	MXE	CDS	NA	no_diff
chr10:123298106:123298229:-@chr10:123279493:123279493:-@chr10:123274637:123274637:-@chr10:123263304:123263455:-	0.58	0.48	0.68	0.57	0.49	0.64	0.01	0.17	(0,0):113,(0,1):38,(1,0):53,(1,1):29	0:69,1:51	(0,0):318,(0,1):71,(1,0):91,(1,1):70	0:127,1:105	chr10	ENST00000357555.5	FGFR2	MXE	CDS	NA	no_diff
chr2:10536961:10537046:+@chr2:10546391:10546391:+@chr2:10548685:10548685:+@chr2:10559860:10560261:+	0.73	0.57	0.85	0.73	0.57	0.85	0	0.26	(0,0):142,(0,1):12,(1,0):1,(1,1):306	0:184,1:135	(0,0):130,(0,1):10,(1,1):273	0:230,1:53	chr2	ENST00000307845.3	HPCAL1	MXE	UTR3	NA	no_diff
chr14:67817328:67817407:-@chr14:67815712:67815712:-@chr14:67814126:67814126:-@chr14:67812485:67812588:-	0.54	0.47	0.62	0.57	0.5	0.64	-0.03	0.16	(0,0):336,(0,1):64,(1,0):117,(1,1):41	0:137,1:85	(0,0):364,(0,1):66,(1,0):139,(1,1):54	0:168,1:91	chr14	ENST00000216442.7	ATP6V1D	MXE	CDS	NA	no_diff
chr15:60689457:60689537:-@chr15:60688572:60688572:-@chr15:60682412:60682412:-@chr15:60677058:60678285:-	0.89	0.75	0.96	0.87	0.7	0.97	0.02	0.19	(0,0):575,(0,1):2,(1,0):20,(1,1):39	0:50,1:11	(0,0):792,(0,1):1,(1,0):12,(1,1):50	0:57,1:6	chr15	ENST00000396024.3	ANXA2	MXE	CDS	NA	no_diff
chr1:21771441:21771712:+@chr1:21779866:21779866:+@chr1:21794934:21794934:+@chr1:21795181:21795390:+	0.18	0.06	0.35	0.27	0.14	0.42	-0.09	0.38	(0,0):193,(0,1):30,(1,0):2,(1,1):87	0:13,1:106	(0,0):497,(0,1):38,(1,0):6,(1,1):115	0:52,1:107	chr1	ENST00000454000.2	NBPF3	MXE	CDS	uORF,MIRc	no_diff
chr1:41157237:41157539:+@chr1:41178359:41178359:+@chr1:41189361:41189361:+@chr1:41204508:41204620:+	0.84	0.63	0.96	0.86	0.62	1	-0.02	0.41	(0,0):181,(0,1):1,(1,0):17,(1,1):100	0:80,1:38	(0,0):271,(1,0):15,(1,1):162	0:157,1:20	chr1	ENST00000424419.2	NFYC	MXE	UTR5	IRES,uORF,AluJb	no_diff
chr1:148306026:148306198:-@chr1:148305203:148305203:-@chr1:148252730:148252730:-@chr1:148250249:148252118:-	0.25	0.03	0.7	0.29	0.16	0.44	-0.04	0.6	(0,0):464,(0,1):4,(1,0):1,(1,1):122	0:11,1:116	(0,0):3525,(0,1):22,(1,0):9,(1,1):382	0:76,1:337	chr1	ENST00000369202	ENSG00000203832	MXE	UTR3	SF2	no_diff
chr9:35689701:35690054:-@chr9:35689143:35689143:-@chr9:35685644:35685644:-@chr9:35685431:35685548:-	0.77	0.62	0.88	0.76	0.61	0.88	0.01	0.29	(0,0):48,(0,1):5,(1,0):24,(1,1):16	0:36,1:9	(0,0):67,(0,1):8,(1,0):37,(1,1):30	0:58,1:17	chr9	ENST00000378292.3	TPM2	MXE	CDS	NA	no_diff
chr5:177659493:177659875:-@chr5:177658406:177658406:-@chr5:177652356:177652356:-@chr5:177651297:177651730:-	0.44	0.28	0.61	0.38	0.23	0.55	0.06	0.37	(0,0):235,(0,1):14,(1,0):12,(1,1):22	0:20,1:28	(0,0):424,(0,1):18,(1,0):12,(1,1):33	0:27,1:36	chr5	ENST00000308158.5	AGXT2L2	MXE	CDS	ConservedRegion,uORF	no_diff
chr4:5819938:5819981:+@chr4:5825344:5825344:+@chr4:5829109:5829109:+@chr4:5830246:5830859:+	0.69	0.38	0.96	0.7	0.53	0.86	-0.01	0.51	(0,0):233,(0,1):1,(1,0):5,(1,1):27	0:27,1:6	(0,0):750,(0,1):6,(1,0):21,(1,1):73	0:60,1:40	chr4	ENST00000382674.2	EVC	MXE	CDS	ConservedRegion,LTR16C,(TG)n	no_diff
chrX:155110958:155111111:+@chrX:155119121:155119121:+@chrX:155125286:155125286:+@chrX:155127776:155127913:+	0.6	0.47	0.72	0.67	0.58	0.76	-0.07	0.3	(0,0):119,(0,1):21,(1,0):39,(1,1):41	0:55,1:46	(0,0):190,(0,1):29,(1,0):71,(1,1):59	0:117,1:42	chrX	ENST00000286448.6	VAMP7	MXE	UTR5	NA	no_diff
chr18:13726328:13726661:-@chr18:13697546:13697546:-@chr18:13687742:13687742:-@chr18:13681604:13682104:-	0.18	0.03	0.43	0.34	0.13	0.6	-0.16	0.72	(0,0):51,(0,1):7,(1,0):1,(1,1):132	0:61,1:79	(0,0):80,(0,1):11,(1,0):4,(1,1):282	0:98,1:199	chr18	ENST00000322247.3	FAM210A	MXE	UTR3	NA	no_diff
chr10:71930169:71930285:-@chr10:71926483:71926483:-@chr10:71922446:71922446:-@chr10:71921375:71921687:-	0.26	0.04	0.6	0.15	0.02	0.38	0.11	0.45	(0,0):478,(0,1):7,(1,1):106	0:24,1:89	(0,0):864,(0,1):15,(1,1):136	0:33,1:118	chr10	ENST00000373241.4	SAR1A	MXE	UTR5	NA	no_diff
chr3:48732523:48733020:-@chr3:48732336:48732336:-@chr3:48732127:48732127:-@chr3:48731410:48731958:-	0.32	0.08	0.6	0.48	0.27	0.64	-0.16	0.69	(0,0):209,(0,1):23,(1,1):322	0:129,1:216	(0,0):193,(0,1):21,(1,1):365	0:258,1:128	chr3	ENST00000433104.2	IP6K2	MXE	CDS	NA	no_diff
chr16:4525924:4526488:+@chr16:4533638:4533638:+@chr16:4546147:4546147:+@chr16:4555485:4555611:+	0.68	0.46	0.86	0.85	0.7	0.96	-0.17	0.72	(0,0):280,(0,1):7,(1,0):14,(1,1):126	0:99,1:48	(0,0):235,(0,1):2,(1,0):13,(1,1):84	0:85,1:14	chr16	ENST00000570646.1	HMOX2	MXE	UTR3	NA	no_diff
chr16:68224671:68225678:+@chr16:68248232:68248232:+@chr16:68255099:68255099:+@chr16:68260253:68264198:+	0.25	0.04	0.59	0.4	0.24	0.6	-0.15	0.59	(0,0):96,(0,1):6,(1,0):2,(1,1):1093	0:477,1:624	(0,0):210,(0,1):16,(1,0):12,(1,1):2157	0:923,1:1262	chr16	ENST00000569766.1	NFATC3	MXE	CDS	NA	no_diff
chr15:74753449:74753535:-@chr15:74753009:74753009:-@chr15:74751360:74751360:-@chr15:74751025:74751237:-	0.83	0.61	0.98	0.68	0.46	0.89	0.15	0.66	(0,0):509,(1,0):25,(1,1):317	0:316,1:26	(0,0):425,(0,1):2,(1,0):21,(1,1):280	0:195,1:108	chr15	ENST00000567435.1	UBL7	MXE	UTR5	NA	no_diff
chr1:160175125:160175312:+@chr1:160176818:160176818:+@chr1:160176920:160176920:+@chr1:160178254:160178455:+	0.23	0.06	0.47	0.35	0.1	0.61	-0.12	0.68	(0,0):178,(0,1):13,(1,0):1,(1,1):56	0:20,1:50	(0,0):210,(0,1):12,(1,0):2,(1,1):64	0:19,1:59	chr1	ENST00000418602.1	RP11-536C5.7	MXE	UTR3	NA	no_diff
chr1:33116034:33116613:-@chr1:33100369:33100369:-@chr1:33099246:33099246:-@chr1:33093109:33093145:-	0.73	0.59	0.84	0.83	0.69	0.93	-0.1	0.44	(0,0):446,(0,1):14,(1,0):29,(1,1):90	0:99,1:34	(0,0):467,(0,1):6,(1,0):22,(1,1):102	0:109,1:21	chr1	ENST00000341885.5	ZBTB8OS	MXE	CDS	NA	no_diff
chr20:17550487:17550856:+@chr20:17572577:17572577:+@chr20:17575577:17575577:+@chr20:17581383:17581873:+	0.27	0.15	0.43	0.38	0.24	0.58	-0.11	0.46	(0,0):606,(1,0):12,(1,1):1441	0:262,1:1191	(0,0):676,(1,0):18,(1,1):1537	0:617,1:938	chr20	ENST00000246069.6	DSTN	MXE	CDS	NA	no_diff
chr4:13378169:13378246:-@chr4:13373419:13373419:-@chr4:13371495:13371495:-@chr4:13369347:13370274:-	0.1	0	0.24	0.28	0.11	0.51	-0.18	0.88	(0,0):73,(0,1):16,(1,1):200	0:35,1:181	(0,0):196,(0,1):15,(1,0):4,(1,1):278	0:105,1:192	chr4	ENST00000330852.5	RAB28	MXE	CDS	NA	no_diff
chr12:21659819:21659910:+@chr12:21660051:21660051:+@chr12:21660878:21660878:+@chr12:21661317:21661495:+	0.53	0.25	0.78	0.75	0.58	0.87	-0.22	0.81	(0,0):115,(0,1):10,(1,1):43	0:18,1:35	(0,0):163,(0,1):11,(1,1):83	0:71,1:23	chr12	ENST00000535593.1	GOLT1B	MXE	CDS	NA	no_diff
chrX:17879218:17879471:-@chrX:17855657:17855657:-@chrX:17847247:17847247:-@chrX:17818165:17820154:-	0.6	0.35	0.9	0.37	0.18	0.6	0.23	0.86	(0,0):44,(1,0):11,(1,1):792	0:754,1:49	(0,0):116,(0,1):1,(1,0):8,(1,1):1112	0:512,1:609	chrX	ENST00000331511.1	RAI2	MXE	UTR5	NA	no_diff
chr7:102743871:102744001:-@chr7:102740223:102743569:-	0.54	0.22	0.87	0.58	0.36	0.86	-0.04	0.57	(0,0):3,(1,0):5,(1,1):121	0:51,1:75	(0,0):20,(1,0):23,(1,1):451	0:306,1:168	chr7	ENST00000341533.4	NAPEPLD	RI	UTR3	ConservedRegion	no_diff
chr15:34630162:34630260:-@chr15:34628611:34628953:-	0.73	0.37	0.99	0.76	0.54	0.95	-0.03	0.53	(0,0):2,(1,0):22,(1,1):8	0:28,1:2	(0,0):11,(1,0):75,(1,1):29	0:94,1:10	chr15	ENST00000397707.2	SLC12A6	RI	UTR5	NA	no_diff
chr15:75644943:75645042:+@chr15:75646591:75646833:+	0.49	0.26	0.82	0.54	0.35	0.77	-0.05	0.54	(0,0):22,(1,0):32,(1,1):14	0:38,1:8	(0,0):68,(0,1):1,(1,0):63,(1,1):19	0:73,1:10	chr15	ENST00000355059.4	NEIL1	RI	CDS	NA	no_diff
chr14:23468263:23468611:-@chr14:23467636:23467950:-	0.68	0.45	0.88	0.68	0.49	0.87	0	0.4	(0,0):10,(0,1):2,(1,0):23,(1,1):47	0:50,1:22	(0,0):15,(0,1):3,(1,0):26,(1,1):44	0:62,1:11	chr14	ENST00000299088.6	C14orf93	RI	UTR5	NA	no_diff
chr14:24584591:24584601:+@chr14:24584724:24584935:+	0.71	0.52	0.89	0.68	0.48	0.87	0.03	0.37	(0,0):120,(1,0):64,(1,1):115	0:149,1:30	(0,0):135,(1,0):53,(1,1):96	0:104,1:45	chr14	ENST00000559115.1	DCAF11	RI	UTR5	ConservedRegion	no_diff
chr14:24584591:24584601:+@chr14:24584752:24584935:+	0.5	0.38	0.64	0.51	0.37	0.67	-0.01	0.27	(0,0):116,(0,1):4,(1,0):74,(1,1):105	0:113,1:70	(0,0):133,(0,1):2,(1,0):60,(1,1):89	0:116,1:35	chr14	ENST00000559115.1	DCAF11	RI	UTR5	ConservedRegion	no_diff
chr14:70235515:70235968:+@chr14:70236228:70237257:+	0.34	0.19	0.52	0.27	0.17	0.4	0.07	0.33	(0,0):491,(0,1):5,(1,0):10,(1,1):123	0:32,1:106	(0,0):825,(0,1):5,(1,0):18,(1,1):353	0:132,1:244	chr14	ENST00000553521.1	SRSF5	RI	CDS	ConservedRegion,uORF,PAS	no_diff
chr17:31258345:31258420:+@chr17:31258499:31258677:+	0.58	0.47	0.7	0.65	0.52	0.79	-0.07	0.32	(0,0):646,(0,1):2,(1,0):115,(1,1):445	0:405,1:157	(0,0):525,(0,1):1,(1,0):100,(1,1):354	0:340,1:115	chr17	ENST00000579849.1	TMEM98	RI	UTR5	IRES	no_diff
chr17:45915636:45915816:-@chr17:45915058:45915368:-	0.28	0.21	0.37	0.2	0.14	0.28	0.08	0.45	(0,0):48,(0,1):26,(1,0):42,(1,1):145	0:74,1:139	(0,0):44,(0,1):30,(1,0):28,(1,1):129	0:56,1:131	chr17	ENST00000407215.3	SCRN2	RI	CDS	NA	no_diff
chr17:48452546:48452873:+@chr17:48453158:48453344:+	0.62	0.48	0.77	0.62	0.5	0.77	0	0.29	(0,0):62,(0,1):1,(1,0):79,(1,1):194	0:185,1:89	(0,0):100,(0,1):1,(1,0):112,(1,1):277	0:276,1:114	chr17	ENST00000338165.4	EME1	RI	CDS	SF2	no_diff
chr17:73996222:73996470:+@chr17:73997493:73997622:+	0.29	0.21	0.39	0.37	0.26	0.5	-0.08	0.33	(0,0):49,(1,0):83,(1,1):88	0:101,1:70	(0,0):47,(1,0):82,(1,1):68	0:118,1:32	chr17	ENST00000397640.1	TEN1	RI	UTR3	IRES	no_diff
chr8:144663379:144663498:-@chr8:144663224:144663313:-	0.54	0.41	0.67	0.53	0.4	0.68	0.01	0.28	(0,0):1269,(1,0):64,(1,1):248	0:183,1:129	(0,0):1436,(1,0):71,(1,1):289	0:175,1:185	chr8	ENST00000532741.1	EEF1D	RI	CDS	NA	no_diff
chr12:6804596:6804817:-@chr12:6802958:6804223:-	0.65	0.42	0.89	0.71	0.46	0.92	-0.06	0.57	(0,0):8,(1,0):15,(1,1):78	0:73,1:20	(0,0):13,(0,1):1,(1,0):23,(1,1):100	0:92,1:32	chr12	ENST00000540656.1	PIANP	RI	CDS	ConservedRegion	no_diff
chr12:7087583:7087669:-@chr12:7086529:7086687:-	0.76	0.55	0.94	0.75	0.58	0.92	0.01	0.35	(0,0):104,(1,0):132,(1,1):33	0:154,1:11	(0,0):184,(1,0):259,(1,1):66	0:310,1:15	chr12	ENST00000535479.1	LPCAT3	RI	CDS	NA	no_diff
chr3:136664425:136664594:+@chr3:136664994:136665137:+	0.83	0.66	0.95	0.78	0.68	0.88	0.05	0.31	(0,0):25,(0,1):2,(1,0):89,(1,1):42	0:120,1:13	(0,0):67,(0,1):8,(1,0):176,(1,1):75	0:237,1:22	chr3	ENST00000288986.2	NCK1	RI	CDS	NA	no_diff
chr3:9798451:9798500:+@chr3:9798745:9798875:+	0.51	0.4	0.65	0.45	0.33	0.59	0.06	0.33	(0,0):91,(0,1):12,(1,0):88,(1,1):40	0:113,1:27	(0,0):64,(0,1):11,(1,0):51,(1,1):23	0:59,1:26	chr3	ENST00000302003.7	OGG1	RI	CDS	ConservedRegion	no_diff
chr16:67241502:67241676:-@chr16:67241042:67241407:-	0.7	0.46	0.89	0.77	0.55	0.93	-0.07	0.39	(0,0):11,(0,1):3,(1,0):15,(1,1):38	0:36,1:20	(0,0):11,(0,1):2,(1,0):16,(1,1):42	0:40,1:20	chr16	ENST00000409509.1	LRRC29	RI	UTR3	NA	no_diff
chr16:28601417:28601546:+@chr16:28601652:28601763:+	0.4	0.21	0.6	0.37	0.2	0.63	0.03	0.39	(0,0):128,(0,1):3,(1,0):11,(1,1):38	0:24,1:28	(0,0):149,(1,0):14,(1,1):66	0:51,1:29	chr16	ENST00000317058.3	CCDC101	RI	CDS	NA	no_diff
chr1:1326677:1326955:-@chr1:1326146:1326245:-	0.66	0.49	0.89	0.57	0.48	0.67	0.09	0.38	(0,0):69,(0,1):4,(1,0):67,(1,1):54	0:91,1:34	(0,0):203,(0,1):18,(1,0):163,(1,1):133	0:249,1:65	chr1	ENST00000480479.1	CCNL2	RI	CDS	ConservedRegion,UNR-bs	no_diff
chr1:155257572:155258498:+@chr1:155259182:155259638:+	0.75	0.52	0.94	0.78	0.56	0.94	-0.03	0.4	(0,0):3,(0,1):1,(1,0):23,(1,1):43	0:57,1:10	(0,0):7,(0,1):1,(1,0):35,(1,1):67	0:88,1:15	chr1	ENST00000368358.3	HCN3	RI	UTR3	T-rich,ConservedRegion,PAS,L2a,K-BOX	no_diff
chr1:1688178:1688321:-@chr1:1687942:1688047:-	0.31	0.13	0.64	0.39	0.24	0.59	-0.08	0.55	(0,0):215,(1,0):7,(1,1):38	0:13,1:32	(0,0):216,(0,1):2,(1,0):16,(1,1):51	0:41,1:28	chr1	ENST00000341426.5	NADK	RI	CDS	ConservedRegion,uORF,IRES,MSTC,MLT1A1,MSTD	no_diff
chr1:24125105:24125220:-@chr1:24124607:24124669:-	0.5	0.29	0.83	0.55	0.31	0.85	-0.05	0.57	(0,0):212,(1,0):35,(1,1):19	0:42,1:12	(0,0):161,(1,0):30,(1,1):15	0:34,1:11	chr1	ENST00000374497.3	GALE	RI	CDS	ConservedRegion,IRES,AluJb	no_diff
chr11:134257738:134257834:-@chr11:134257442:134257588:-	0.38	0.19	0.62	0.47	0.26	0.7	-0.09	0.47	(0,0):11,(0,1):7,(1,0):11,(1,1):12	0:16,1:14	(0,0):19,(0,1):3,(1,0):13,(1,1):21	0:21,1:16	chr11	ENST00000392580.1	B3GAT1	RI	UTR3	ConservedRegion,IRES,uORF	no_diff
chr11:124972533:124972705:-@chr11:124972028:124972247:-	0.43	0.26	0.63	0.35	0.17	0.58	0.08	0.43	(0,0):56,(0,1):2,(1,0):19,(1,1):47	0:38,1:30	(0,0):57,(1,0):15,(1,1):52	0:45,1:22	chr11	ENST00000531909.1	TMEM218	RI	UTR5	uORF,IRES	no_diff
chr11:124972630:124972705:-@chr11:124972028:124972198:-	0.81	0.5	0.98	0.75	0.51	0.97	0.06	0.39	(0,0):58,(1,0):48,(1,1):18	0:57,1:9	(0,0):57,(1,0):45,(1,1):22	0:64,1:3	chr11	ENST00000531909.1	TMEM218	RI	UTR5	IRES,uORF	no_diff
chr11:47182678:47182741:+@chr11:47182997:47183798:+	0.4	0.31	0.49	0.34	0.24	0.44	0.06	0.26	(0,0):107,(0,1):2,(1,0):69,(1,1):525	0:279,1:317	(0,0):86,(1,0):45,(1,1):430	0:204,1:271	chr11	ENST00000528488.1	C11orf49	RI	CDS	ConservedRegion	no_diff
chr11:66136840:66137003:-@chr11:66136531:66136602:-	0.42	0.21	0.69	0.47	0.25	0.74	-0.05	0.47	(0,0):31,(1,0):12,(1,1):22	0:23,1:11	(0,0):42,(1,0):17,(1,1):26	0:30,1:13	chr11	ENST00000311161.7	SLC29A2	RI	CDS	ConservedRegion	no_diff
chr10:75560398:75560517:+@chr10:75560843:75560953:+	0.43	0.24	0.7	0.34	0.25	0.46	0.09	0.39	(0,0):60,(0,1):2,(1,0):23,(1,1):21	0:30,1:16	(0,0):218,(0,1):6,(1,0):60,(1,1):74	0:91,1:49	chr10	ENST00000492395.1	KIAA0913	RI	CDS	ConservedRegion	no_diff
chr20:33530734:33530809:-@chr20:33530291:33530388:-	0.74	0.46	0.95	0.79	0.53	0.99	-0.05	0.58	(0,0):65,(1,0):18,(1,1):5	0:19,1:4	(0,0):287,(1,0):65,(1,1):22	0.0604167	chr20	ENST00000216951.2	GSS	RI	CDS	ConservedRegion,uORF,IRES	no_diff
chr19:19243466:19243563:-@chr19:19243161:19243242:-	0.79	0.48	0.98	0.83	0.68	0.95	-0.04	0.39	(0,0):109,(1,0):31,(1,1):16	0:39,1:8	(0,0):301,(0,1):3,(1,0):104,(1,1):33	0:128,1:12	chr19	ENST00000450333.2	TMEM161A	RI	CDS	NA	no_diff
chr19:36235224:36235322:-@chr19:36234971:36235046:-	0.22	0.18	0.27	0.18	0.12	0.23	0.04	0.19	(0,0):236,(0,1):95,(1,0):84,(1,1):29	0:86,1:122	(0,0):173,(0,1):62,(1,0):43,(1,1):23	0:50,1:78	chr19	ENST00000590135.1	U2AF1L4	RI	CDS	NA	no_diff
chr19:9939003:9939065:+@chr19:9939268:9939351:+	0.48	0.39	0.58	0.4	0.31	0.5	0.08	0.34	(0,0):3849,(0,1):2,(1,0):241,(1,1):180	0:326,1:97	(0,0):2318,(0,1):4,(1,0):125,(1,1):107	0:178,1:58	chr19	ENST00000586895.1	UBL5	RI	CDS	NA	no_diff
chr19:55743560:55743579:-@chr19:55743443:55743462:-	0.55	0.1	0.98	0.5	0.07	0.93	0.05	0.74	(0,0):277,(1,0):107	0.0743056	(0,0):419,(1,0):160	0.111111	chr19	ENST00000412770.2	PPP6R1	RI	CDS	SF2SAN_900	no_diff
chr19:5720020:5720176:-@chr19:5719715:5719827:-	0.42	0.25	0.66	0.44	0.28	0.64	-0.02	0.39	(0,0):70,(0,1):1,(1,0):17,(1,1):45	0:39,1:24	(0,0):119,(1,0):33,(1,1):79	0:66,1:46	chr19	ENST00000360614.3	LONP1	RI	CDS	SF2	no_diff
chr2:180307951:180308195:-@chr2:180306709:180306904:-	0.79	0.54	0.99	0.77	0.57	0.95	0.02	0.44	(0,0):1,(1,0):42,(1,1):15	0:55,1:2	(0,0):9,(0,1):1,(1,0):91,(1,1):31	0:120,1:3	chr2	ENST00000466398.1	ZNF385B	RI	UTR3	ConservedRegion,PAS	no_diff
chr2:74593910:74594059:-@chr2:74593586:74593687:-	0.54	0.33	0.77	0.53	0.43	0.65	0.01	0.34	(0,0):61,(1,0):24,(1,1):38	0:47,1:15	(0,0):499,(1,0):156,(1,1):238	0:282,1:112	chr2	ENST00000361874.3	DCTN1	RI	CDS	NA	no_diff
chr2:97215490:97215542:+@chr2:97215925:97216022:+	0.23	0.12	0.38	0.25	0.13	0.4	-0.02	0.24	(0,0):53,(0,1):10,(1,0):17,(1,1):2	0:17,1:12	(0,0):46,(0,1):8,(1,0):19,(1,1):4	0:21,1:10	chr2	ENST00000357485.3	ARID5A	RI	CDS	NA	no_diff
chrX:135960222:135960245:-@chrX:135960074:135960118:-	0.44	0.06	0.96	0.58	0.19	0.94	-0.14	0.84	(0,0):186,(1,0):141	0.0979167	(0,0):767,(1,0):614	0.426389	chrX	ENST00000431446.3	RBMX	RI	CDS	NA	no_diff
chr9:34647086:34647564:+@chr9:34647829:34647958:+	0.44	0.25	0.63	0.61	0.38	0.86	-0.17	0.67	(0,0):188,(1,0):18,(1,1):86	0:69,1:35	(0,0):186,(1,0):22,(1,1):80	0:69,1:33	chr9	ENST00000554550.1	GALT	RI	CDS	NA	no_diff
chr15:41102050:41102168:+@chr15:41102352:41102414:+	0.56	0.3	0.86	0.73	0.44	0.95	-0.17	0.81	(0,0):93,(1,0):20,(1,1):23	0:31,1:12	(0,0):73,(1,0):31,(1,1):24	0:49,1:6	chr15	ENST00000564258.1	ZFYVE19	RI	CDS	NA	no_diff
chr15:91499842:91500130:+@chr15:91500343:91500733:+	0.48	0.25	0.76	0.33	0.15	0.55	0.15	0.66	(0,0):41,(0,1):4,(1,0):10,(1,1):33	0:21,1:26	(0,0):34,(0,1):5,(1,0):8,(1,1):53	0:17,1:49	chr15	ENST00000394258.2	RCCD1	RI	CDS	NA	no_diff
chr22:30766315:30766939:+@chr22:30767639:30767716:+	0.16	0.07	0.35	0.31	0.18	0.5	-0.15	0.6	(0,0):5,(0,1):3,(1,0):5,(1,1):30	0:13,1:25	(0,0):8,(0,1):5,(1,0):19,(1,1):44	0:31,1:37	chr22	ENST00000405659.1	CCDC157	RI	CDS	NA	no_diff
chr22:50656618:50656831:-@chr22:50656347:50656527:-	0.78	0.47	0.98	0.55	0.37	0.72	0.23	0.97	(0,0):26,(1,0):12,(1,1):43	0:46,1:9	(0,0):89,(0,1):5,(1,0):26,(1,1):112	0:71,1:72	chr22	ENST00000248846.5	TUBGCP6	RI	CDS	NA	no_diff
chr22:31520831:31520892:+@chr22:31521819:31521996:+	0.82	0.49	0.98	0.64	0.43	0.87	0.18	0.79	(0,0):12,(1,0):43,(1,1):9	00:52:00	(0,0):34,(1,0):99,(1,1):27	0:120,1:6	chr22	ENST00000331075.5	INPP5J	RI	CDS	NA	no_diff
chr22:51020987:51021249:-@chr22:51020178:51020786:-	0.3	0.13	0.51	0.41	0.22	0.65	-0.11	0.51	(0,0):43,(0,1):8,(1,0):6,(1,1):37	0:21,1:30	(0,0):42,(0,1):1,(1,0):10,(1,1):90	0:59,1:42	chr22	ENST00000406938.2	CHKB	RI	CDS	NA	no_diff
chr17:7490217:7490284:+@chr17:7490479:7490589:+	0.67	0.54	0.8	0.8	0.59	0.99	-0.13	0.51	(0,0):839,(1,0):182,(1,1):149	0:297,1:34	(0,0):612,(1,0):149,(1,1):110	0:220,1:39	chr17	ENST00000250124.6	MPDU1	RI	CDS	NA	no_diff
chr3:39142238:39142368:-@chr3:39141796:39141945:-	0.33	0.2	0.49	0.2	0.11	0.32	0.13	0.57	(0,0):99,(0,1):2,(1,0):19,(1,1):42	0:35,1:28	(0,0):91,(0,1):4,(1,0):17,(1,1):55	0:29,1:47	chr3	ENST00000441302.2	GORASP1	RI	CDS	NA	no_diff
chr3:52326276:52326585:+@chr3:52327062:52327208:+	0.63	0.49	0.77	0.78	0.65	0.89	-0.15	0.73	(0,0):36,(0,1):6,(1,0):72,(1,1):64	0:115,1:27	(0,0):33,(0,1):4,(1,0):108,(1,1):72	0:151,1:33	chr3	ENST00000473032.1	GLYCTK	RI	CDS	NA	no_diff
chr16:30762427:30762538:+@chr16:30762870:30762924:+	0.64	0.51	0.77	0.79	0.65	0.9	-0.15	0.97	(0,0):372,(0,1):5,(1,0):217,(1,1):81	0:267,1:36	(0,0):284,(0,1):4,(1,0):217,(1,1):55	0:257,1:19	chr16	ENST00000563588.1	PHKG2	RI	CDS	NA	no_diff
chr16:90097584:90097597:+@chr16:90097707:90097904:+	0.19	0.07	0.38	0.32	0.17	0.56	-0.13	0.49	(0,0):60,(1,0):5,(1,1):45	0:8,1:42	(0,0):78,(1,0):15,(1,1):67	0:34,1:48	chr16	ENST00000536122.1	GAS8	RI	CDS	NA	no_diff
chr1:1688218:1688321:-@chr1:1687942:1688047:-	0.2	0.09	0.35	0.37	0.22	0.58	-0.17	0.86	(0,0):213,(0,1):2,(1,0):9,(1,1):36	0:17,1:30	(0,0):217,(0,1):1,(1,0):21,(1,1):46	0:32,1:36	chr1	ENST00000341426.5	NADK	RI	CDS	NA	no_diff
chr1:161087931:161087968:+@chr1:161088606:161088671:+	0.84	0.56	0.99	0.64	0.36	0.9	0.2	0.81	(0,0):102,(1,0):72	0.05	(0,0):102,(0,1):1,(1,0):55	0:55,1:1	chr1	ENST00000368009.2	NIT1	RI	CDS	NA	no_diff
chr11:124972533:124972705:-@chr11:124972028:124972213:-	0.38	0.22	0.56	0.25	0.15	0.4	0.13	0.45	(0,0):55,(0,1):3,(1,0):21,(1,1):45	0:33,1:36	(0,0):55,(0,1):2,(1,0):15,(1,1):52	0:31,1:38	chr11	ENST00000531909.1	TMEM218	RI	UTR5	NA	no_diff
chr11:65632191:65632286:+@chr11:65632586:65632616:+	0.7	0.42	0.93	0.49	0.2	0.8	0.21	0.83	(0,0):135,(1,0):40,(1,1):8	0:45,1:3	(0,0):129,(1,0):22,(1,1):9	0:24,1:7	chr11	ENST00000308110.4	MUS81	RI	CDS	NA	no_diff
chr11:66136840:66137003:-@chr11:66136531:66136670:-	0.31	0.13	0.56	0.12	0.04	0.24	0.19	0.87	(0,0):29,(0,1):2,(1,0):7,(1,1):27	0:14,1:22	(0,0):34,(0,1):8,(1,0):4,(1,1):39	0:9,1:42	chr11	ENST00000311161.7	SLC29A2	RI	CDS	NA	no_diff
chr11:803174:803647:-@chr11:802682:802854:-	0.44	0.25	0.74	0.59	0.35	0.94	-0.15	0.63	(0,0):28,(1,0):14,(1,1):64	0:43,1:35	(0,0):29,(1,0):24,(1,1):79	0:78,1:25	chr11	ENST00000525028.1	PIDD	RI	CDS	NA	no_diff
chr11:9304918:9305140:-@chr11:9302201:9302588:-	0.76	0.62	0.95	0.87	0.75	0.97	-0.11	0.47	(0,0):10,(0,1):1,(1,0):269,(1,1):77	0:333,1:14	(0,0):26,(1,0):630,(1,1):162	0:763,1:29	chr11	ENST00000299596.4	TMEM41B	RI	UTR3	NA	no_diff
chr6:31939646:31939993:+@chr6:31940079:31940288:+	0.42	0.23	0.67	0.57	0.39	0.8	-0.15	0.57	(0,0):162,(1,0):14,(1,1):211	0:66,1:159	(0,0):153,(0,1):2,(1,0):21,(1,1):181	0:159,1:45	chr6	ENST00000477826.1	DOM3Z	RI	CDS	NA	no_diff
chr6:58276137:58276289:-@chr6:58275636:58275783:-	0.38	0.19	0.66	0.6	0.36	0.82	-0.22	0.96	(0,0):39,(1,0):13,(1,1):26	0:21,1:18	(0,0):68,(1,0):24,(1,1):25	0:44,1:5	chr6	ENST00000450081.1	GUSBP4	RI	UTR3	NA	no_diff
chr6:43481097:43481189:-@chr6:43480807:43480836:-	0.87	0.72	0.99	0.71	0.55	0.89	0.16	0.76	(0,0):940,(1,0):348,(1,1):72	0:415,1:5	(0,0):632,(0,1):2,(1,0):252,(1,1):59	0:300,1:13	chr6	ENST00000372422.2	YIPF3	RI	CDS	NA	no_diff
chr20:3146413:3147006:-@chr20:3146143:3146274:-	0.57	0.22	0.92	0.69	0.41	0.94	-0.12	0.73	(0,0):17,(1,0):5,(1,1):51	0:42,1:14	(0,0):49,(1,0):16,(1,1):117	0:125,1:8	chr20	ENST00000329152.3	RP5-1187M17.10	RI	CDS	NA	no_diff
chr19:36278070:36278461:+@chr19:36278546:36279724:+	0.71	0.42	0.95	0.82	0.64	0.95	-0.11	0.53	(0,0):7,(0,1):2,(1,0):10,(1,1):137	0:108,1:41	(0,0):14,(0,1):2,(1,0):24,(1,1):207	0:207,1:26	chr19	ENST00000378944.5	ARHGAP33	RI	CDS	NA	no_diff
chr19:49422287:49422367:+@chr19:49422451:49422543:+	0.44	0.24	0.77	0.65	0.42	0.91	-0.21	0.95	(0,0):332,(1,0):12,(1,1):38	0:24,1:26	(0,0):674,(1,0):32,(1,1):59	0:89,1:2	chr19	ENST00000405315.3	NUCB1	RI	CDS	NA	no_diff
chr19:13227001:13227245:-@chr19:13226811:13226866:-	0.37	0.24	0.53	0.23	0.14	0.33	0.14	0.74	(0,0):203,(1,0):21,(1,1):100	0:76,1:45	(0,0):310,(0,1):1,(1,0):24,(1,1):183	0:64,1:144	chr19	ENST00000357720.4	TRMT1	RI	CDS	NA	no_diff
chr4:10456218:10456612:-@chr4:10452507:10454646:-	0.76	0.49	0.97	0.58	0.38	0.83	0.18	0.78	(0,0):4,(1,0):17,(1,1):28	0:37,1:8	(0,0):30,(1,0):35,(1,1):97	0:84,1:48	chr4	ENST00000515072.1	ZNF518B	RI	UTR5	NA	no_diff
chr2:85828429:85828605:-@chr2:85828144:85828230:-	0.81	0.58	0.97	0.68	0.43	0.91	0.13	0.66	(0,0):91,(0,1):1,(1,0):30,(1,1):18	0:44,1:5	(0,0):54,(0,1):2,(1,0):20,(1,1):13	0:28,1:7	chr2	ENST00000306353.3	TMEM150A	RI	CDS	NA	no_diff
chr9:36190853:36191270:+@chr9:36197548:36197592:+@chr9:36198981:36199093:+	0.25	0.14	0.38	0.3	0.17	0.46	-0.05	0.31	(0,0):1168,(1,0):16,(1,1):714	0:186,1:544	(0,0):926,(1,0):17,(1,1):602	0:161,1:458	chr9	ENST00000433436.2	CLTA	SE	CDS	NA	no_diff
chr9:37819285:37819398:+@chr9:37842086:37842287:+@chr9:37854777:37854979:+	0.85	0.67	0.97	0.81	0.69	0.92	0.04	0.26	(0,0):78,(0,1):1,(1,0):43,(1,1):36	0:79,1:1	(0,0):240,(0,1):4,(1,0):83,(1,1):71	0:146,1:12	chr9	ENST00000377724.3	DCAF10	SE	CDS	NA	no_diff
chr9:32985969:32986028:-@chr9:32987758:32987844:-@chr9:32989757:32990089:-	0.6	0.36	0.84	0.53	0.3	0.84	0.07	0.61	(0,0):546,(1,0):18,(1,1):107	0:74,1:51	(0,0):540,(0,1):1,(1,0):15,(1,1):103	0:60,1:59	chr9	ENST00000379825.2	APTX	SE	CDS	ConservedRegion,IRES,uORF	no_diff
chr9:131604933:131605080:-@chr9:131607632:131607796:-@chr9:131644176:131644354:-	0.8	0.57	0.98	0.87	0.66	1	-0.07	0.38	(0,0):26,(1,0):11,(1,1):10	0:19,1:2	(0,0):50,(1,0):16,(1,1):12	0:27,1:1	chr9	ENST00000462722.1	CCBL1	SE	UTR3	ConservedRegion,IRES	no_diff
chr9:97842976:97843062:+@chr9:97844857:97845001:+@chr9:97848964:97849500:+	0.62	0.47	0.77	0.55	0.45	0.67	0.07	0.33	(0,0):53,(0,1):8,(1,0):35,(1,1):114	0:95,1:62	(0,0):64,(0,1):20,(1,0):51,(1,1):132	0:115,1:88	chr9	ENST00000297979.5	C9orf3	SE	UTR3	ConservedRegion	no_diff
chr9:112898407:112900819:+@chr9:112918599:112918777:+@chr9:112930679:112934795:+	0.52	0.26	0.82	0.59	0.46	0.71	-0.07	0.55	(0,0):8,(0,1):3,(1,0):7,(1,1):270	0:173,1:107	(0,0):40,(0,1):17,(1,0):56,(1,1):1822	0:1369,1:526	chr9	ENST00000434623.2	AKAP2	SE	CDS	NA	no_diff
chr5:69717107:69717184:+@chr5:69717564:69717598:+@chr5:69717940:69718355:+	0.65	0.48	0.79	0.7	0.59	0.8	-0.05	0.27	(0,0):68,(0,1):9,(1,0):19,(1,1):12	0:23,1:17	(0,0):211,(0,1):19,(1,0):49,(1,1):24	0:66,1:26	chr5	ENST00000513202.1	GTF2H2B	SE	UTR5	NA	no_diff
chr5:180659659:180659889:+@chr5:180660413:180660435:+@chr5:180660636:180660763:+	0.91	0.76	0.99	0.84	0.69	0.95	0.07	0.34	(0,0):129,(1,0):20,(1,1):96	0:107,1:9	(0,0):165,(0,1):2,(1,0):25,(1,1):114	0:128,1:13	chr5	ENST00000508930.1	TRIM41	SE	CDS	ConservedRegion	no_diff
chr5:453485:454166:+@chr5:458015:458140:+@chr5:462075:462185:+	0.64	0.44	0.91	0.71	0.56	0.88	-0.07	0.42	(0,0):392,(1,0):41,(1,1):385	0:359,1:67	(0,0):715,(1,0):80,(1,1):640	0:602,1:118	chr5	ENST00000512944.1	EXOC3	SE	CDS	NA	no_diff
chr5:21461892:21461975:+@chr5:21471571:21471755:+@chr5:21473466:21474565:+	0.33	0.2	0.47	0.34	0.21	0.48	-0.01	0.3	(0,0):226,(0,1):4,(1,0):18,(1,1):280	0:123,1:179	(0,0):383,(0,1):10,(1,0):19,(1,1):244	0:114,1:159	chr5	ENST00000508260.1	RP11-823P9.1	SE	UTR3	NA	no_diff
chr5:60241004:60241255:+@chr5:60368952:60369041:+@chr5:60394819:60394859:+	0.83	0.66	0.98	0.89	0.74	0.98	-0.06	0.25	(0,0):201,(1,0):112,(1,1):320	0:407,1:25	(0,0):180,(1,0):96,(1,1):242	0:330,1:8	chr5	ENST00000296597.5	NDUFAF2	SE	CDS	NA	no_diff
chr5:1035598:1036499:+@chr5:1037635:1037813:+@chr5:1037920:1039058:+	0.19	0.09	0.32	0.19	0.1	0.31	0	0.2	(0,0):30,(0,1):26,(1,0):10,(1,1):195	0:42,1:189	(0,0):36,(0,1):23,(1,0):8,(1,1):180	0:34,1:177	chr5	ENST00000296849.5	NKD2	SE	CDS	NA	no_diff
chr5:178043883:178043949:-@chr5:178044345:178044432:-@chr5:178045557:178046174:-	0.3	0.14	0.51	0.3	0.2	0.42	0	0.34	(0,0):25,(0,1):7,(1,0):4,(1,1):25	0:11,1:25	(0,0):128,(0,1):31,(1,0):18,(1,1):75	0:32,1:92	chr5	ENST00000520878.1	CLK4	SE	CDS	SF2,ConservedRegion	no_diff
chr5:139944041:139944443:+@chr5:139945333:139945556:+@chr5:139946150:139948802:+	0.74	0.66	0.83	0.76	0.68	0.84	-0.02	0.18	(0,0):242,(1,0):362,(1,1):6447	0:4954,1:1855	(0,0):208,(1,0):294,(1,1):5169	0:4262,1:1201	chr5	ENST00000323146.3	SLC35A4	SE	UTR5	NA	no_diff
chr5:176918011:176918421:-@chr5:176918808:176918977:-@chr5:176919406:176919436:-	0.63	0.39	0.88	0.59	0.3	0.86	0.04	0.55	(0,0):364,(1,0):21,(1,1):78	0:76,1:23	(0,0):245,(1,0):14,(1,1):59	0:49,1:24	chr5	ENST00000493815.1	PDLIM7	SE	CDS	ConservedRegion	no_diff
chr5:179921403:179921763:+@chr5:179922652:179922755:+@chr5:179956275:179956388:+	0.21	0.11	0.34	0.26	0.18	0.36	-0.05	0.27	(0,0):48,(0,1):27,(1,0):10,(1,1):38	0:24,1:51	(0,0):120,(0,1):50,(1,0):29,(1,1):112	0:52,1:139	chr5	ENST00000393356.1	CNOT6	SE	UTR5	NA	no_diff
chr5:21461892:21461975:+@chr5:21470619:21470771:+@chr5:21471571:21471755:+	0.58	0.32	0.93	0.56	0.34	0.76	0.02	0.53	(0,0):209,(0,1):1,(1,0):14,(1,1):26	0:31,1:10	(0,0):344,(0,1):3,(1,0):18,(1,1):25	0:28,1:18	chr5	ENST00000508260.1	RP11-823P9.1	SE	UTR3	NA	no_diff
chr11:46638826:46639440:+@chr11:46651457:46651650:+@chr11:46665829:46665910:+	0.34	0.23	0.48	0.26	0.17	0.38	0.08	0.34	(0,0):124,(0,1):9,(1,0):31,(1,1):251	0:80,1:211	(0,0):124,(0,1):4,(1,0):23,(1,1):270	0:89,1:208	chr11	ENST00000312040.4	ATG13	SE	UTR5	L1MA6,FAM,uORF,IRES,AluJo	no_diff
chr11:95523060:95523907:+@chr11:95528680:95528723:+@chr11:95532396:95532552:+	0.18	0.06	0.39	0.22	0.12	0.35	-0.04	0.33	(0,0):5,(0,1):15,(1,0):3,(1,1):40	0:17,1:41	(0,0):51,(0,1):30,(1,0):10,(1,1):173	0:53,1:160	chr11	ENST00000325542.5	CEP57	SE	CDS	NA	no_diff
chr11:85694909:85695016:-@chr11:85701293:85701421:-@chr11:85707869:85707972:-	0.26	0.14	0.39	0.34	0.27	0.43	-0.08	0.36	(0,0):34,(0,1):19,(1,0):14,(1,1):9	0:19,1:23	(0,0):242,(0,1):53,(1,0):78,(1,1):80	0:107,1:104	chr11	ENST00000532317.1	PICALM	SE	CDS	NA	no_diff
chr11:3379156:3381795:-@chr11:3382973:3383119:-@chr11:3392205:3392376:-	0.4	0.17	0.66	0.38	0.26	0.53	0.02	0.4	(0,0):49,(0,1):5,(1,0):5,(1,1):108	0:67,1:51	(0,0):236,(0,1):17,(1,0):22,(1,1):610	0:218,1:431	chr11	ENST00000354599.6	ZNF195	SE	CDS	NA	no_diff
chr11:46529741:46529920:-@chr11:46534277:46534363:-@chr11:46563495:46564948:-	0.59	0.35	0.82	0.57	0.44	0.72	0.02	0.38	(0,0):25,(0,1):2,(1,0):8,(1,1):129	0:64,1:75	(0,0):120,(0,1):8,(1,0):27,(1,1):468	0:240,1:263	chr11	ENST00000314845.3	AMBRA1	SE	CDS	NA	no_diff
chr11:57505080:57505140:+@chr11:57505826:57505906:+@chr11:57506136:57506242:+	0.33	0.2	0.51	0.24	0.12	0.41	0.09	0.35	(0,0):625,(0,1):2,(1,0):23,(1,1):80	0:55,1:50	(0,0):837,(0,1):1,(1,0):16,(1,1):86	0:28,1:75	chr11	ENST00000378312.4	TMX2	SE	CDS	NA	no_diff
chr11:123601195:123601693:-@chr11:123611125:123611244:-@chr11:123612257:123612382:-	0.77	0.49	0.97	0.7	0.39	0.93	0.07	0.64	(0,0):59,(1,0):10,(1,1):50	0:38,1:22	(0,0):127,(0,1):1,(1,0):17,(1,1):93	0:60,1:51	chr11	ENST00000336139.4	ZNF202	SE	UTR5	uORF	no_diff
chr11:126081310:126081725:+@chr11:126099120:126099231:+@chr11:126104890:126104982:+	0.69	0.45	0.95	0.74	0.43	0.97	-0.05	0.65	(0,0):89,(1,0):9,(1,1):43	0:40,1:12	(0,0):110,(1,0):13,(1,1):61	0:72,1:2	chr11	ENST00000533050.1	FAM118B	SE	UTR5	IRES	no_diff
chr11:63993762:63994604:+@chr11:63996719:63996820:+@chr11:63996950:63997487:+	0.4	0.22	0.61	0.4	0.18	0.69	0	0.44	(0,0):188,(0,1):4,(1,0):14,(1,1):356	0:108,1:266	(0,0):134,(1,0):7,(1,1):258	0:115,1:150	chr11	ENST00000279206.3	NUDT22	SE	CDS	NA	no_diff
chr11:105929463:105929836:-@chr11:105947234:105947434:-@chr11:105948039:105948491:-	0.76	0.5	0.93	0.71	0.39	0.96	0.05	0.56	(0,0):39,(0,1):1,(1,0):14,(1,1):45	0:57,1:3	(0,0):102,(1,0):18,(1,1):92	0:73,1:37	chr11	ENST00000526793.1	KBTBD3	SE	UTR5	uORF	no_diff
chr11:85685751:85685855:-@chr11:85687666:85687725:-@chr11:85692172:85692271:-	0.75	0.54	0.9	0.74	0.65	0.83	0.01	0.31	(0,0):70,(0,1):3,(1,0):24,(1,1):22	0:39,1:10	(0,0):365,(0,1):21,(1,0):116,(1,1):79	0:170,1:46	chr11	ENST00000532317.1	PICALM	SE	CDS	NA	no_diff
chr11:123601195:123601693:-@chr11:123611101:123611244:-@chr11:123612257:123612382:-	0.69	0.34	0.95	0.64	0.39	0.93	0.05	0.67	(0,0):59,(1,0):10,(1,1):50	0:30,1:30	(0,0):127,(0,1):1,(1,0):17,(1,1):93	0:82,1:29	chr11	ENST00000336139.4	ZNF202	SE	UTR5	uORF	no_diff
chr18:12009882:12009986:+@chr18:12012169:12012348:+@chr18:12014264:12014372:+	0.86	0.67	0.98	0.87	0.65	0.99	-0.01	0.28	(0,0):145,(1,0):47,(1,1):32	0:77,1:2	(0,0):115,(1,0):37,(1,1):22	0:58,1:1	chr18	ENST00000269159.3	IMPA2	SE	CDS	NA	no_diff
chr18:14103872:14106408:-@chr18:14124349:14124475:-@chr18:14132274:14132488:-	0.82	0.6	0.97	0.83	0.6	0.97	-0.01	0.34	(0,0):36,(0,1):1,(1,0):10,(1,1):40	0:45,1:6	(0,0):156,(0,1):2,(1,0):22,(1,1):205	0:178,1:51	chr18	ENST00000589203.1	ZNF519	SE	CDS	NA	no_diff
chr18:28644815:28648178:-@chr18:28648265:28648310:-@chr18:28648860:28649117:-	0.41	0.14	0.76	0.34	0.22	0.45	0.07	0.58	(0,0):8,(0,1):4,(1,0):2,(1,1):69	0:16,1:59	(0,0):66,(0,1):40,(1,0):23,(1,1):781	0:253,1:591	chr18	ENST00000251081.6	DSC2	SE	CDS	NA	no_diff
chr18:77477810:77478016:+@chr18:77496355:77496521:+@chr18:77513652:77514510:+	0.81	0.62	0.96	0.82	0.68	0.95	-0.01	0.32	(0,0):109,(1,0):33,(1,1):234	0:193,1:74	(0,0):304,(1,0):90,(1,1):630	0:619,1:101	chr18	ENST00000299543.7	CTDP1	SE	CDS	NA	no_diff
chr8:94929084:94929307:+@chr8:94930139:94930173:+@chr8:94934244:94938303:+	0.51	0.25	0.8	0.51	0.32	0.69	0	0.48	(0,0):16,(0,1):4,(1,0):4,(1,1):209	0:102,1:115	(0,0):46,(0,1):10,(1,0):12,(1,1):727	0:304,1:445	chr8	ENST00000297598.4	PDP1	SE	UTR3	NA	no_diff
chr8:38034106:38034657:+@chr8:38050206:38050313:+@chr8:38065030:38065284:+	0.66	0.42	0.88	0.69	0.56	0.81	-0.03	0.38	(0,0):27,(0,1):4,(1,0):15,(1,1):54	0:53,1:20	(0,0):53,(0,1):11,(1,0):46,(1,1):158	0:168,1:47	chr8	ENST00000432471.2	BAG4	SE	CDS	NA	no_diff
chr8:141900414:141900868:-@chr8:141935760:141935848:-@chr8:142011224:142011380:-	0.64	0.36	0.85	0.67	0.52	0.79	-0.03	0.4	(0,0):33,(0,1):3,(1,0):11,(1,1):39	0:35,1:18	(0,0):126,(0,1):11,(1,0):38,(1,1):119	0:119,1:49	chr8	ENST00000522684.1	PTK2	SE	UTR5	IRES	no_diff
chr8:42010457:42010623:+@chr8:42011996:42012054:+@chr8:42012134:42012796:+	0.14	0.03	0.36	0.11	0.02	0.25	0.03	0.29	(0,0):10,(0,1):9,(1,0):1,(1,1):28	0:5,1:33	(0,0):33,(0,1):16,(1,0):2,(1,1):92	0:7,1:103	chr8	ENST00000518421.1	AP3M2	SE	UTR5	IRES	no_diff
chr8:146054428:146054475:+@chr8:146054866:146054989:+@chr8:146062776:146062892:+	0.74	0.49	0.91	0.71	0.47	0.9	0.03	0.36	(0,0):60,(0,1):1,(1,0):17,(1,1):7	0:23,1:2	(0,0):111,(0,1):1,(1,0):20,(1,1):13	0:25,1:9	chr8	ENST00000532777.1	ZNF7	SE	CDS	ConservedRegion	no_diff
chr22:30812223:30812392:+@chr22:30822705:30822832:+@chr22:30824449:30825041:+	0.63	0.52	0.74	0.71	0.55	0.86	-0.08	0.34	(0,0):1100,(1,0):131,(1,1):1120	0:894,1:357	(0,0):921,(1,0):87,(1,1):673	0:613,1:147	chr22	ENST00000266263.5	MTFP1	SE	CDS	NA	no_diff
chr22:24984647:24985917:-@chr22:24988184:24988390:-@chr22:24988830:24989131:-	0.6	0.38	0.78	0.53	0.29	0.76	0.07	0.47	(0,0):27,(0,1):5,(1,0):15,(1,1):69	0:47,1:42	(0,0):42,(0,1):6,(1,0):12,(1,1):53	0:40,1:31	chr22	ENST00000248923.4	GGT1	SE	CDS	NA	no_diff
chr22:50687260:50687288:-@chr22:50687532:50687597:-@chr22:50687757:50687945:-	0.87	0.66	1	0.88	0.66	1	-0.01	0.31	(0,0):43,(1,0):16,(1,1):6	0:20,1:2	(0,0):70,(1,0):17,(1,1):20	0:33,1:4	chr22	ENST00000415993.1	HDAC10	SE	CDS	NA	no_diff
chr22:32021567:32022002:-@chr22:32023989:32024196:-@chr22:32026790:32027371:-	0.37	0.19	0.58	0.33	0.19	0.5	0.04	0.38	(0,0):94,(0,1):4,(1,0):9,(1,1):89	0:41,1:61	(0,0):153,(0,1):7,(1,0):12,(1,1):115	0:51,1:83	chr22	ENST00000460723.1	PISD	SE	UTR3	uORF	no_diff
chr22:37415675:37415815:+@chr22:37419793:37419968:+@chr22:37420233:37425854:+	0.65	0.45	0.86	0.64	0.46	0.81	0.01	0.3	(0,0):184,(1,0):37,(1,1):1787	0:1348,1:476	(0,0):211,(1,0):31,(1,1):1587	0:1287,1:331	chr22	ENST00000397129.1	MPST	SE	CDS	NA	no_diff
chr22:39052644:39052755:+@chr22:39052961:39053148:+@chr22:39061551:39061690:+	0.28	0.16	0.42	0.33	0.21	0.5	-0.05	0.27	(0,0):97,(0,1):13,(1,0):16,(1,1):25	0:25,1:29	(0,0):115,(0,1):13,(1,0):21,(1,1):27	0:31,1:30	chr22	ENST00000485501.1	CBY1	SE	UTR5	MSTD,uORF,IRES,Charlie4z,L1ME3A	no_diff
chr22:46639908:46641135:-@chr22:46643003:46643118:-@chr22:46646153:46646576:-	0.54	0.36	0.74	0.52	0.3	0.77	0.02	0.46	(0,0):113,(0,1):4,(1,0):23,(1,1):449	0:236,1:240	(0,0):117,(1,0):12,(1,1):327	0:135,1:204	chr22	ENST00000314567.3	CDPF1	SE	CDS	ConservedRegion	no_diff
chr22:50944464:50944642:-@chr22:50944799:50944931:-@chr22:50945067:50945110:-	0.36	0.21	0.55	0.44	0.34	0.56	-0.08	0.38	(0,0):171,(1,0):22,(1,1):76	0:47,1:51	(0,0):482,(1,0):82,(1,1):212	0:171,1:123	chr22	ENST00000474879.2	LMF2	SE	CDS	ConservedRegion	no_diff
chr22:50944464:50944642:-@chr22:50944714:50944931:-@chr22:50945067:50945110:-	0.78	0.6	0.94	0.84	0.71	0.97	-0.06	0.33	(0,0):100,(1,0):93,(1,1):76	0:153,1:16	(0,0):300,(1,0):264,(1,1):212	0:442,1:34	chr22	ENST00000474879.2	LMF2	SE	CDS	ConservedRegion	no_diff
chr12:102559507:102559661:+@chr12:102576327:102576405:+@chr12:102589729:102591389:+	0.33	0.13	0.68	0.4	0.23	0.58	-0.07	0.58	(0,0):64,(0,1):4,(1,0):4,(1,1):195	0:49,1:154	(0,0):331,(0,1):5,(1,0):18,(1,1):846	0:487,1:382	chr12	ENST00000327680.2	PARPBP	SE	CDS	NA	no_diff
chr12:49740517:49741334:+@chr12:49741427:49741888:+@chr12:49742549:49743495:+	0.25	0.12	0.41	0.34	0.2	0.5	-0.09	0.38	(0,0):10,(0,1):6,(1,0):9,(1,1):121	0:55,1:81	(0,0):12,(0,1):6,(1,0):19,(1,1):176	0:73,1:128	chr12	ENST00000549441.1	DNAJC22	SE	UTR5	ConservedRegion,uORF	no_diff
chr12:109895435:109895487:-@chr12:109895797:109895989:-@chr12:109898441:109898610:-	0.48	0.34	0.66	0.39	0.28	0.51	0.09	0.43	(0,0):214,(1,0):55,(1,1):90	0:90,1:55	(0,0):269,(1,0):57,(1,1):118	0:89,1:86	chr12	ENST00000228495.6	KCTD10	SE	CDS	ConservedRegion,PAS	no_diff
chr12:9808469:9808575:+@chr12:9809164:9809293:+@chr12:9809517:9811018:+	0.55	0.27	0.82	0.5	0.3	0.71	0.05	0.5	(0,0):10,(0,1):3,(1,0):6,(1,1):42	0:24,1:27	(0,0):10,(0,1):8,(1,0):12,(1,1):74	0:64,1:30	chr12	ENST00000575094.1	RP11-705C15.2	SE	UTR5	NA	no_diff
chr12:122213515:122214350:+@chr12:122214728:122215803:+@chr12:122215983:122216356:+	0.67	0.47	0.85	0.66	0.51	0.91	0.01	0.41	(0,0):76,(1,0):54,(1,1):88	0:101,1:41	(0,0):118,(1,0):96,(1,1):156	0:203,1:49	chr12	ENST00000449592.2	TMEM120B	SE	UTR3	BRD-BOX,ConservedRegion,PAS,MER102c,AluSx,(TTTTG)n,MER58A,AluJb	no_diff
chr12:124856568:124857156:-@chr12:124858959:124859009:-@chr12:124862783:124862930:-	0.39	0.24	0.58	0.35	0.25	0.44	0.04	0.27	(0,0):36,(0,1):15,(1,0):12,(1,1):65	0:39,1:53	(0,0):110,(0,1):44,(1,0):31,(1,1):230	0:111,1:194	chr12	ENST00000405201.1	NCOR2	SE	CDS	NA	no_diff
chr12:95645706:95645847:+@chr12:95650926:95650962:+@chr12:95656682:95656857:+	0.6	0.2	0.98	0.63	0.4	0.87	-0.03	0.97	(0,0):173,(1,0):5,(1,1):87	0:43,1:49	(0,0):475,(0,1):1,(1,0):23,(1,1):219	0:193,1:50	chr12	ENST00000436874.1	VEZT	SE	CDS	ConservedRegion	no_diff
chr12:49396927:49397073:-@chr12:49397337:49397378:-@chr12:49397540:49397705:-	0.75	0.54	0.97	0.66	0.48	0.86	0.09	0.57	(0,0):422,(0,1):1,(1,0):46,(1,1):334	0:334,1:47	(0,0):328,(0,1):2,(1,0):39,(1,1):295	0:226,1:110	chr12	ENST00000316299.5	PRKAG1	SE	CDS	NA	no_diff
chr12:111070277:111070364:+@chr12:111072475:111072601:+@chr12:111074286:111074306:+	0.78	0.52	0.95	0.78	0.49	0.98	0	0.47	(0,0):89,(1,0):37,(1,1):8	00:45:00	(0,0):132,(1,0):41,(1,1):12	0:47,1:6	chr12	ENST00000551590.1	TCTN1	SE	CDS	NA	no_diff
chr2:27014999:27015108:+@chr2:27015370:27015701:+@chr2:27016013:27016194:+	0.4	0.31	0.5	0.47	0.36	0.62	-0.07	0.3	(0,0):167,(0,1):7,(1,0):109,(1,1):161	0:155,1:122	(0,0):90,(0,1):3,(1,0):94,(1,1):123	0:155,1:65	chr2	ENST00000335756.4	CENPA	SE	CDS	NA	no_diff
chr2:172309634:172309723:+@chr2:172314481:172314585:+@chr2:172325398:172325540:+	0.84	0.58	0.97	0.85	0.72	0.95	-0.01	0.28	(0,0):31,(0,1):1,(1,0):18,(1,1):12	0:28,1:3	(0,0):76,(0,1):3,(1,0):53,(1,1):32	0:83,1:5	chr2	ENST00000468592.1	DCAF17	SE	CDS	NA	no_diff
chr2:204131237:204131404:+@chr2:204143296:204143438:+@chr2:204144782:204144836:+	0.51	0.22	0.91	0.59	0.32	1	-0.08	0.68	(0,0):51,(1,0):6,(1,1):15	0:7,1:14	(0,0):117,(1,0):17,(1,1):32	0:48,1:1	chr2	ENST00000356079.4	CYP20A1	SE	CDS	NA	no_diff
chr2:11312051:11312171:+@chr2:11315094:11315135:+@chr2:11317863:11319001:+	0.73	0.42	0.96	0.77	0.56	0.92	-0.04	0.42	(0,0):30,(0,1):1,(1,0):7,(1,1):89	0:87,1:10	(0,0):39,(0,1):2,(1,0):13,(1,1):95	0:85,1:25	chr2	ENST00000295083.3	PQLC3	SE	CDS	ConservedRegion	no_diff
chr2:85581516:85581952:+@chr2:85582199:85582293:+@chr2:85582678:85584375:+	0.71	0.54	0.86	0.79	0.62	0.93	-0.08	0.38	(0,0):55,(0,1):5,(1,0):19,(1,1):118	0:94,1:48	(0,0):73,(0,1):3,(1,0):24,(1,1):160	0:166,1:21	chr2	ENST00000409013.3	ELMOD3	SE	UTR5	uORF	no_diff
chr2:233431788:233431924:+@chr2:233438973:233439051:+@chr2:233445614:233449600:+	0.42	0.28	0.56	0.34	0.22	0.48	0.08	0.35	(0,0):1291,(0,1):21,(1,0):23,(1,1):1084	0:467,1:661	(0,0):1096,(0,1):21,(1,0):20,(1,1):1286	0:403,1:924	chr2	ENST00000409098.1	EIF4E2	SE	UTR3	NA	no_diff
chr2:97757199:97757449:-@chr2:97757600:97757722:-@chr2:97760438:97760624:-	0.53	0.29	0.78	0.53	0.27	0.8	0	0.59	(0,0):44,(0,1):3,(1,0):15,(1,1):65	0:58,1:25	(0,0):44,(0,1):2,(1,0):12,(1,1):50	0:28,1:36	chr2	ENST00000272610.3	FAHD2B	SE	UTR5	NA	no_diff
chr2:85827014:85827141:-@chr2:85827468:85827531:-@chr2:85828144:85828605:-	0.47	0.31	0.64	0.38	0.2	0.57	0.09	0.47	(0,0):117,(0,1):12,(1,0):16,(1,1):75	0:59,1:44	(0,0):65,(0,1):9,(1,0):8,(1,1):53	0:20,1:50	chr2	ENST00000306353.3	TMEM150A	SE	CDS	NA	no_diff
chr2:48541776:48541953:+@chr2:48555700:48555841:+@chr2:48573340:48573890:+	0.2	0.01	0.58	0.19	0.09	0.31	0.01	0.46	(0,0):8,(0,1):2,(1,0):1,(1,1):29	0:5,1:27	(0,0):29,(0,1):19,(1,0):10,(1,1):132	0:49,1:112	chr2	ENST00000340553.3	FOXN2	SE	UTR5	uORF,IRES,MER2B	no_diff
chr2:239146910:239148209:-@chr2:239148302:239148388:-@chr2:239148466:239148765:-	0.58	0.34	0.85	0.53	0.32	0.75	0.05	0.48	(0,0):8,(1,0):20,(1,1):636	0:382,1:274	(0,0):5,(0,1):3,(1,0):17,(1,1):441	0:221,1:240	chr2	ENST00000272937.5	HES6	SE	CDS	NA	no_diff
chr2:127808378:127808488:-@chr2:127808730:127808819:-@chr2:127816587:127816731:-	0.6	0.25	0.92	0.59	0.34	0.85	0.01	0.62	(0,0):71,(0,1):2,(1,0):8,(1,1):15	0:17,1:8	(0,0):80,(0,1):2,(1,0):11,(1,1):22	0:23,1:12	chr2	ENST00000376113.2	BIN1	SE	CDS	NA	no_diff
chr2:3605976:3606588:+@chr2:3607038:3607319:+@chr2:3608907:3610487:+	0.77	0.67	0.86	0.83	0.74	0.9	-0.06	0.21	(0,0):14,(0,1):12,(1,0):63,(1,1):145	0:175,1:45	(0,0):13,(0,1):11,(1,0):86,(1,1):214	0:261,1:50	chr2	ENST00000438436.1	AC108488.3	SE	UTR5	NA	no_diff
chr2:242029395:242029459:-@chr2:242033692:242033844:-@chr2:242041668:242041747:-	0.76	0.59	0.9	0.8	0.62	0.92	-0.04	0.32	(0,0):680,(0,1):3,(1,0):35	0:35,1:3	(0,0):1189,(0,1):3,(1,0):44	0:44,1:3	chr2	ENST00000241527.6	MTERFD2	SE	UTR5	NA	no_diff
chr2:97757199:97757449:-@chr2:97757600:97757725:-@chr2:97760438:97760624:-	0.55	0.36	0.76	0.54	0.32	0.81	0.01	0.48	(0,0):42,(0,1):3,(1,0):17,(1,1):65	0:62,1:23	(0,0):44,(0,1):2,(1,0):12,(1,1):50	0:35,1:29	chr2	ENST00000272610.3	FAHD2B	SE	UTR5	NA	no_diff
chr2:182784023:182784173:+@chr2:182785324:182785377:+@chr2:182786675:182787139:+	0.69	0.51	0.83	0.73	0.63	0.84	-0.04	0.26	(0,0):62,(0,1):6,(1,0):23,(1,1):119	0:100,1:48	(0,0):206,(0,1):15,(1,0):83,(1,1):508	0:467,1:139	chr2	ENST00000431877.2	SSFA2	SE	CDS	NA	no_diff
chr2:85581516:85581952:+@chr2:85582678:85582839:+@chr2:85584090:85584865:+	0.8	0.6	0.93	0.89	0.72	0.98	-0.09	0.36	(0,0):118,(0,1):2,(1,0):21,(1,1):70	0:72,1:21	(0,0):159,(0,1):1,(1,0):25,(1,1):90	0:101,1:15	chr2	ENST00000409013.3	ELMOD3	SE	UTR5	uORF	no_diff
chr2:208602135:208602170:+@chr2:208605379:208605430:+@chr2:208606947:208607066:+	0.92	0.76	1	0.88	0.74	0.97	0.04	0.31	(0,0):44,(1,0):24,(1,1):11	0:34,1:1	(0,0):78,(0,1):2,(1,0):42,(1,1):22	0:62,1:4	chr2	ENST00000392209.3	CCNYL1	SE	CDS	NA	no_diff
chr2:74763418:74763598:-@chr2:74763836:74764055:-@chr2:74776496:74776790:-	0.48	0.23	0.75	0.53	0.3	0.76	-0.05	0.47	(0,0):14,(0,1):3,(1,0):7,(1,1):14	0:16,1:8	(0,0):25,(0,1):3,(1,0):10,(1,1):17	0:17,1:13	chr2	ENST00000470907.2	LOXL3	SE	CDS	NA	no_diff
chr2:27805836:27806009:+@chr2:27806293:27806583:+@chr2:27820934:27821121:+	0.3	0.21	0.41	0.28	0.21	0.36	0.02	0.18	(0,0):92,(0,1):17,(1,0):33,(1,1):65	0:54,1:61	(0,0):232,(0,1):28,(1,0):60,(1,1):139	0:120,1:107	chr2	ENST00000355467.3	ZNF512	SE	CDS	NA	no_diff
chr2:242029395:242029459:-@chr2:242033692:242033847:-@chr2:242041668:242041747:-	0.78	0.57	0.93	0.82	0.66	0.94	-0.04	0.35	(0,0):677,(0,1):3,(1,0):38	0:38,1:3	(0,0):1184,(0,1):3,(1,0):49	0:49,1:3	chr2	ENST00000241527.6	MTERFD2	SE	UTR5	NA	no_diff
chrX:48935700:48935771:-@chrX:48937598:48937754:-@chrX:48957520:48958114:-	0.81	0.66	0.94	0.87	0.63	0.98	-0.06	0.4	(0,0):440,(0,1):3,(1,0):32,(1,1):54	0:70,1:19	(0,0):605,(1,0):20,(1,1):61	0:74,1:7	chrX	ENST00000356463.3	WDR45	SE	UTR3	IRES	no_diff
chrX:138808505:138811121:-@chrX:138813810:138813914:-@chrX:138820075:138820228:-	0.72	0.46	0.95	0.72	0.62	0.82	0	0.42	(0,0):21,(0,1):1,(1,0):8,(1,1):158	0:140,1:27	(0,0):179,(0,1):16,(1,0):76,(1,1):1172	0:960,1:304	chrX	ENST00000361648.2	ATP11C	SE	CDS	NA	no_diff
chrX:100910305:100913128:-@chrX:100913447:100913555:-@chrX:100914062:100914487:-	0.83	0.54	0.97	0.78	0.55	0.92	0.05	0.41	(0,0):10,(1,0):6,(1,1):73	0:77,1:2	(0,0):22,(0,1):2,(1,0):17,(1,1):324	0:221,1:122	chrX	ENST00000330154.2	ARMCX2	SE	UTR5	uORF	no_diff
chrX:14039583:14039630:-@chrX:14044171:14044340:-@chrX:14047896:14048212:-	0.71	0.51	0.85	0.65	0.45	0.82	0.06	0.38	(0,0):95,(0,1):6,(1,0):30,(1,1):9	0:38,1:7	(0,0):192,(0,1):5,(1,0):19,(1,1):7	0:23,1:8	chrX	ENST00000380523.4	GEMIN8	SE	UTR5	uORF	no_diff
chrX:118112308:118112426:+@chrX:118116784:118116906:+@chrX:118123371:118123635:+	0.58	0.34	0.82	0.67	0.51	0.8	-0.09	0.46	(0,0):36,(0,1):4,(1,0):15,(1,1):32	0:33,1:18	(0,0):75,(0,1):7,(1,0):44,(1,1):91	0:108,1:34	chrX	ENST00000481285.1	LONRF3	SE	CDS	NA	no_diff
chrX:134480944:134481397:+@chrX:134482679:134482762:+@chrX:134483035:134483239:+	0.18	0.02	0.45	0.24	0.1	0.4	-0.06	0.48	(0,0):7,(0,1):4,(1,1):16	0:1,1:19	(0,0):28,(0,1):18,(1,0):8,(1,1):84	0:24,1:86	chrX	ENST00000339249.4	ZNF449	SE	CDS	MER33,uORF,TOP	no_diff
chrX:52976461:52977913:-@chrX:52984352:52984441:-@chrX:52985471:52987682:-	0.76	0.49	0.97	0.82	0.65	0.95	-0.06	0.38	(0,0):27,(0,1):2,(1,0):13,(1,1):292	0:180,1:127	(0,0):28,(0,1):2,(1,0):23,(1,1):437	0:440,1:22	chrX	ENST00000330025.6	FAM156A	SE	UTR3	uORF	no_diff
chrX:9608299:9608400:+@chrX:9621585:9621729:+@chrX:9622255:9622572:+	0.35	0.2	0.5	0.26	0.15	0.38	0.09	0.38	(0,0):27,(0,1):17,(1,0):14,(1,1):11	0:16,1:26	(0,0):39,(0,1):28,(1,0):15,(1,1):19	0:18,1:44	chrX	ENST00000407597.2	TBL1X	SE	UTR3	NA	no_diff
chrX:133923253:133923296:-@chrX:133923610:133923666:-@chrX:133927845:133927923:-	0.57	0.4	0.71	0.6	0.47	0.73	-0.03	0.29	(0,0):156,(0,1):11,(1,0):32,(1,1):1	0:33,1:11	(0,0):286,(0,1):16,(1,0):54,(1,1):3	0:55,1:18	chrX	ENST00000370790.1	FAM122B	SE	CDS	NA	no_diff
chr17:37809734:37810003:+@chr17:37813151:37813338:+@chr17:37814028:37814152:+	0.74	0.58	0.88	0.73	0.58	0.96	0.01	0.3	(0,0):305,(0,1):1,(1,0):99,(1,1):219	0:270,1:49	(0,0):290,(1,0):108,(1,1):261	0:284,1:85	chr17	ENST00000336308.5	STARD3	SE	CDS	NA	no_diff
chr17:47784327:47784430:-@chr17:47784705:47784806:-@chr17:47785438:47785532:-	0.5	0.38	0.66	0.42	0.29	0.57	0.08	0.35	(0,0):469,(0,1):9,(1,0):47,(1,1):75	0:81,1:50	(0,0):434,(0,1):9,(1,0):39,(1,1):82	0:71,1:59	chr17	ENST00000240333.6	SLC35B1	SE	CDS	NA	no_diff
chr17:36896544:36896695:-@chr17:36904132:36904224:-@chr17:36904449:36904632:-	0.77	0.42	0.97	0.74	0.43	0.98	0.03	0.72	(0,0):147,(1,0):13,(1,1):49	0:45,1:17	(0,0):192,(1,0):15,(1,1):54	0:53,1:16	chr17	ENST00000360797.2	PCGF2	SE	UTR5	ConservedRegion	no_diff
chr17:37809734:37810003:+@chr17:37813163:37813338:+@chr17:37814028:37814152:+	0.78	0.63	0.93	0.76	0.61	0.91	0.02	0.26	(0,0):305,(0,1):1,(1,0):99,(1,1):219	0:269,1:50	(0,0):290,(1,0):108,(1,1):261	0:272,1:97	chr17	ENST00000336308.5	STARD3	SE	CDS	NA	no_diff
chr17:43551710:43553092:-@chr17:43555467:43555513:-@chr17:43559803:43559891:-	0.73	0.41	0.96	0.76	0.6	0.89	-0.03	0.44	(0,0):109,(0,1):1,(1,0):8,(1,1):119	0:110,1:18	(0,0):198,(0,1):5,(1,0):23,(1,1):211	0:196,1:43	chr17	ENST00000430334.3	PLEKHM1	SE	CDS	ConservedRegion	no_diff
chr17:29249958:29250088:+@chr17:29253845:29253936:+@chr17:29258907:29258986:+	0.62	0.47	0.76	0.64	0.5	0.78	-0.02	0.28	(0,0):51,(0,1):11,(1,0):48,(1,1):39	0:70,1:28	(0,0):47,(0,1):9,(1,0):48,(1,1):50	0:82,1:25	chr17	ENST00000585130.1	ADAP2	SE	CDS	NA	no_diff
chr17:5012221:5013163:-@chr17:5014371:5014514:-@chr17:5015095:5015646:-	0.25	0.12	0.4	0.34	0.21	0.47	-0.09	0.39	(0,0):108,(0,1):9,(1,0):8,(1,1):266	0:72,1:211	(0,0):102,(0,1):16,(1,0):18,(1,1):280	0:123,1:191	chr17	ENST00000575898.1	ZNF232	SE	CDS	NA	no_diff
chr17:7220524:7220689:-@chr17:7220780:7221003:-@chr17:7221107:7221251:-	0.89	0.7	0.98	0.86	0.7	0.96	0.03	0.27	(0,0):89,(1,0):47,(1,1):40	0:76,1:11	(0,0):231,(0,1):1,(1,0):114,(1,1):121	0:216,1:20	chr17	ENST00000315614.7	NEURL4	SE	CDS	NA	no_diff
[truncated: 477 more rows]

## Sheet: Control Rep2
Miso Event Name (coordinates)	Poly_lo_ci	Poly_hi_ci	Poly_Psi	Cyto_lo_ci	Cyto_hi_ci	Cyto_Psi	DeltaPsi	Bayes Factor	Polyribosome_Reads	Poly Assigned Reads	Cytoplasm_Reads	Cyto Assigned Reads	Chrom	Ensemble Gene_id	Gene Symbol	Event Type	Location	Overlapping Elements ( Psi @ 1-Psi )	Differential_or_not
[truncated: 1,954 more rows]

[truncated: 2 more sheets: Rapamycin Rep1, Rapamycin Rep2]
