# Supplementary material for: Frac-seq reveals isoform-specific recruitment to polyribosomes
Source: HighWire-hosted journal article supplement (doi:10.1101/gr.148585.112), 2013-06-19
Supplement: Supplemental_Table_3.xlsx [file Supplemental_Table_3.xlsx]

## Sheet: Sheet1
Supplemental Table 2. Comparison of MISO and RT-PCR DY
	Event Type	DY RT-PCR	Standard Dev DY RT-PCR	DY MISO	Valid
NDUFS1	Cassette Exon	-0.2693	0.053	-0.53	Yes
hnRNPR	Cassette Exon	-0.4584	0.038	-0.38	Yes
SGOL1	Cassette Exon	-0.0597	0.0048	-0.48	Yes
DHX9	Cassette Exon	0.18	0.035	0.35	Yes
KARS	Cassette Exon	0.4456	0.027	0.27	Yes
THOC5	Cassette Exon	0.3137	0.033	0.33	Yes
MOV10	Cassette Exon	0.0413	0.051	0.51	No
RBM41	Alternatve Last Exon	not determined	not determined		Yes
				Validation rate	87.5
				Experimental false possitive rate	12.5
