# Supplementary material for: Frac-seq reveals isoform-specific recruitment to polyribosomes
Source: HighWire-hosted journal article supplement (doi:10.1101/gr.148585.112), 2013-06-19
Supplement: Supplemental_Table_4.xlsx [file Supplemental_Table_4.xlsx]

## Sheet: Sheet1
GO COMPONENT
GO term	Description	P-value	FDR q-value	Enrichment (N, B, n, b)	Genes
GO:0005634	nucleus	1.25e-05	0.0147	1.30 (11465,3919,379,169)	[+] Show genes
GO:0016607	nuclear speck	0.000271	0.159	2.96 (11465,143,379,14)	[+] Show genes
GO FUNCTION
GO term	Description	P-value	FDR q-value	Enrichment (N, B, n, b)	Genes
GO:0003676	nucleic acid binding	0.000166	0.56	1.35 (11465,2651,379,118)	[+] Show genes
GO:0003723	RNA binding	0.000205	0.345	1.74 (11465,763,379,44)	[+] Show genes
GO PROCESS
GO term	Description	P-value	FDR q-value	Enrichment (N, B, n, b)	Genes
GO:0008380	RNA splicing	1.89e-05	0.192	2.59 (11465,280,379,24)	[+] Show genes
GO:0000375	RNA splicing, via transesterification reactions	1.93e-05	0.0979	3.11 (11465,175,379,18)	[+] Show genes
GO:0090304	nucleic acid metabolic process	3.29e-05	0.112	1.36 (11465,2911,379,131)	[+] Show genes
GO:0000377	RNA splicing, via transesterification reactions with bulged adenosine as nucleophile	4.04e-05	0.103	3.06 (11465,168,379,17)	[+] Show genes
GO:0000398	mRNA splicing, via spliceosome	4.04e-05	0.0821	3.06 (11465,168,379,17)	[+] Show genes
GO:0006139	nucleobase-containing compound metabolic process	7.3e-05	0.124	1.31 (11465,3292,379,143)	[+] Show genes
GO:0006725	cellular aromatic compound metabolic process	7.87e-05	0.114	1.31 (11465,3381,379,146)	[+] Show genes
GO:0046483	heterocycle metabolic process	8.51e-05	0.108	1.30 (11465,3386,379,146)	[+] Show genes
GO:0034641	cellular nitrogen compound metabolic process	0.000122	0.138	1.29 (11465,3551,379,151)	[+] Show genes
GO:0006376	mRNA splice site selection	0.000124	0.126	9.45 (11465,16,379,5)	[+] Show genes
GO:0016070	RNA metabolic process	0.000128	0.118	1.37 (11465,2499,379,113)	[+] Show genes
GO:0006405	RNA export from nucleus	0.000236	0.2	4.25 (11465,64,379,9)	[+] Show genes
GO:0006397	mRNA processing	0.000281	0.219	2.14 (11465,353,379,25)	[+] Show genes
GO:0006351	transcription, DNA-dependent	0.000371	0.269	1.43 (11465,1734,379,82)	[+] Show genes
GO:1901360	organic cyclic compound metabolic process	0.000484	0.328	1.26 (11465,3505,379,146)	[+] Show genes
GO:0006406	mRNA export from nucleus	0.00053	0.337	4.25 (11465,57,379,8)	[+] Show genes
GO:0043170	macromolecule metabolic process	0.000604	0.361	1.20 (11465,4832,379,191)	[+] Show genes
GO:0006807	nitrogen compound metabolic process	0.000704	0.398	1.24 (11465,3791,379,155)	[+] Show genes
GO:0034645	cellular macromolecule biosynthetic process	0.000726	0.389	1.35 (11465,2172,379,97)	[+] Show genes
GO:0019438	aromatic compound biosynthetic process	0.00092	0.468	1.35 (11465,2106,379,94)	[+] Show genes
